# Supplementary material for: Single-Cell Transcriptomics Analysis of Human Small Antral Follicles
Source: Int J Mol Sci. 2021 Nov 4;22(21):11955. doi: 10.3390/ijms222111955 (PMC8584910; doi:10.3390/ijms222111955)
Supplement: Supplementary file 1 [file ijms-22-11955-s001.zip]

Archive with 5 entries (5 files):
- fig suppl-R2.pdf
- Table S1. Markers_pct.0.6_padj0.05.xls
- Table S2. GOterms oocytes GOGVMII.xlsx
- Table S3. GOterms GC GC1GC2.DEGs.xlsx
- Table S4. cellphoneDB.mean.filtered.xlsx
