# Supplementary material for: Single-Cell Transcriptomics Analysis of Human Small Antral Follicles
Source: Int J Mol Sci. 2021 Nov 4;22(21):11955. doi: 10.3390/ijms222111955 (PMC8584910; doi:10.3390/ijms222111955)
Supplement: Supplementary file 1 [file ijms-22-11955-s001.zip › Table S1. Markers_pct.0.6_padj0.05.xls]

## Sheet: markers_pct.0.6_padj0.05
p_val	avg_log2FC	pct.1	pct.2	p_val_adj	cluster	gene
4.6887e-09	3.46011	0.946	0.509	0.00015725	0	INHBB
8.10459e-09	2.22187	0.946	0.596	0.000271812	0	PDGFC
1.60093e-08	5.58744	0.786	0.368	0.000536919	0	ERVE-1
2.29036e-08	0.351582	0.982	0.877	0.00076814	0	LRRC75A
5.62942e-08	1.66726	0.982	0.754	0.00188799	0	FHL2
7.8517e-08	1.82437	1	0.772	0.0026333	0	UBXN8
1.21851e-07	3.31798	0.875	0.614	0.00408663	0	AL590434.1
1.87904e-07	2.32808	0.875	0.684	0.00630191	0	APOBEC3C
3.06628e-07	4.9077	0.911	0.737	0.0102837	0	THBS1
3.3894e-07	0.912441	1	0.772	0.0113674	0	WIPF3
3.66382e-07	1.72148	0.982	0.895	0.0122877	0	PRKAR2B
3.69715e-07	1.83257	0.982	0.842	0.0123995	0	MARCKS
4.36994e-07	4.3299	0.714	0.298	0.0146559	0	MEX3B
4.91514e-07	1.70057	0.929	0.614	0.0164844	0	DDAH1
6.56702e-07	3.76436	0.821	0.509	0.0220245	0	CRHBP
1.14338e-06	3.36236	0.696	0.316	0.0383466	0	AL109615.3
8.23669e-15	3.33773	0.75	0.03	2.76242e-10	2	FAM83A-AS1
6.03936e-13	3.45667	0.833	0.069	2.02548e-08	2	LINC01266
6.33329e-13	3.63813	0.917	0.109	2.12406e-08	2	HSD11B1
1.14551e-12	2.32566	0.667	0.03	3.84182e-08	2	AC078785.2
1.30605e-12	2.15738	0.667	0.03	4.38023e-08	2	AC084880.2
1.93196e-12	2.16286	0.667	0.03	6.47941e-08	2	AL034399.2
2.04598e-12	3.88679	0.917	0.109	6.86182e-08	2	TP53AIP1
2.10444e-12	2.75757	1	0.158	7.05788e-08	2	LINC02436
3.7741e-12	3.40493	0.833	0.089	1.26576e-07	2	MUC1
4.97133e-12	3.15258	0.75	0.059	1.66728e-07	2	ACY3
5.11041e-12	3.72491	0.833	0.089	1.71393e-07	2	LIF
5.13419e-12	3.58772	0.917	0.139	1.7219e-07	2	TMEM121B
5.73949e-12	5.87798	1	0.208	1.92491e-07	2	CHKA
6.93538e-12	3.39488	0.75	0.059	2.32599e-07	2	AL357054.3
7.90634e-12	2.53953	0.667	0.04	2.65163e-07	2	C15orf59-AS1
1.13736e-11	3.41058	0.667	0.04	3.81447e-07	2	LINC00957
1.13736e-11	2.30523	0.667	0.04	3.81447e-07	2	AL590708.1
1.63175e-11	2.83771	0.667	0.04	5.47257e-07	2	AC091891.1
1.83928e-11	2.98172	0.667	0.04	6.16858e-07	2	AC022596.2
2.01956e-11	3.30914	0.917	0.129	6.77321e-07	2	FAM71F2
3.03271e-11	2.50045	0.833	0.089	1.01711e-06	2	SLC15A5
4.57002e-11	4.08715	1	0.208	1.53269e-06	2	LINC01581
4.70024e-11	3.34105	0.917	0.158	1.57637e-06	2	HGD
4.94083e-11	3.13785	1	0.208	1.65705e-06	2	HNF1B
4.96167e-11	3.92085	1	0.198	1.66405e-06	2	FUT9
5.28101e-11	3.05355	0.75	0.079	1.77115e-06	2	LINC01491
6.09869e-11	3.27405	0.75	0.069	2.04538e-06	2	AP005482.1
6.5538e-11	2.68642	0.833	0.089	2.19801e-06	2	LINC00927
6.73052e-11	2.82052	0.667	0.04	2.25728e-06	2	CTSG
7.55861e-11	2.99141	0.917	0.129	2.53501e-06	2	LINC00240
8.91109e-11	2.89827	0.667	0.05	2.9886e-06	2	LRTM1
9.22955e-11	3.14293	0.833	0.099	3.09541e-06	2	AC087473.1
1.12753e-10	3.53512	0.833	0.109	3.78152e-06	2	ERMN
1.17056e-10	1.71735	1	0.198	3.92582e-06	2	OPN5
1.17195e-10	2.50541	0.75	0.079	3.93048e-06	2	PRAMEF4
1.21004e-10	2.8844	0.833	0.119	4.05824e-06	2	CYP7A1
1.35106e-10	3.90388	0.833	0.109	4.5312e-06	2	MIR194-2HG
1.55119e-10	3.1447	0.667	0.05	5.20237e-06	2	LINC02412
1.57455e-10	3.00873	0.75	0.079	5.28072e-06	2	TUBA3E
1.57455e-10	1.93846	0.75	0.079	5.28072e-06	2	LRRC66
1.76239e-10	2.84878	0.917	0.158	5.91069e-06	2	CLCA2
1.7659e-10	3.28479	1	0.218	5.92247e-06	2	KY
1.81961e-10	2.65024	0.917	0.139	6.10262e-06	2	FUT1
1.84206e-10	3.70428	1	0.238	6.17791e-06	2	LEPR
1.91167e-10	2.76487	0.917	0.158	6.41137e-06	2	LINC01234
1.9825e-10	2.03068	1	0.238	6.6489e-06	2	GFAP
2.11127e-10	3.49464	0.75	0.079	7.08079e-06	2	AL499616.1
2.1166e-10	2.71013	0.833	0.109	7.09866e-06	2	AC025539.1
2.26173e-10	3.92164	0.667	0.059	7.58539e-06	2	FLRT1
2.27114e-10	3.48103	0.75	0.089	7.61694e-06	2	TREML1
2.40484e-10	2.30595	0.667	0.05	8.06535e-06	2	MKRN2OS
2.40484e-10	1.39931	0.667	0.05	8.06535e-06	2	AC004817.3
2.51364e-10	3.08925	0.667	0.059	8.43023e-06	2	AC006058.3
2.54424e-10	3.67505	1	0.267	8.53286e-06	2	PRRX1
2.65648e-10	3.00713	1	0.238	8.90929e-06	2	STXBP5-AS1
2.74511e-10	3.18153	0.75	0.089	9.20656e-06	2	AC134508.1
2.79287e-10	3.0706	0.667	0.059	9.36674e-06	2	NKX6-3
2.95896e-10	3.69736	0.917	0.178	9.92375e-06	2	CAPN11
3.11215e-10	3.13084	0.75	0.079	1.04375e-05	2	LINC01107
3.23645e-10	3.73305	1	0.257	1.08544e-05	2	MICAL1
3.31523e-10	2.33115	0.75	0.089	1.11186e-05	2	HOXB4
3.32849e-10	2.56365	1	0.208	1.11631e-05	2	LINC01198
3.82492e-10	3.43104	0.667	0.059	1.2828e-05	2	LGALS9B
3.86348e-10	3.40744	1	0.208	1.29573e-05	2	TSPAN11
4.12277e-10	3.60615	0.833	0.119	1.38269e-05	2	AC023154.1
4.24543e-10	3.47701	0.667	0.059	1.42383e-05	2	AL589745.1
4.24543e-10	3.21015	0.667	0.059	1.42383e-05	2	AC018781.1
4.24543e-10	3.01625	0.667	0.059	1.42383e-05	2	AP001189.5
4.24543e-10	2.96681	0.667	0.059	1.42383e-05	2	KHDRBS2
4.62912e-10	2.52684	0.917	0.158	1.55251e-05	2	GP2
5.22614e-10	3.20432	0.667	0.059	1.75274e-05	2	AC128688.2
5.22614e-10	2.39821	0.667	0.059	1.75274e-05	2	LINC01994
5.42593e-10	2.26092	0.917	0.158	1.81975e-05	2	KATNAL2
5.81461e-10	3.14622	0.833	0.119	1.9501e-05	2	KRT3
5.81461e-10	2.80835	0.833	0.119	1.9501e-05	2	DCST1
6.08544e-10	2.60784	0.75	0.079	2.04093e-05	2	DYDC2
6.08544e-10	1.7052	0.75	0.079	2.04093e-05	2	PBOV1
6.42674e-10	3.26148	0.667	0.059	2.1554e-05	2	IL1F10
6.77099e-10	2.89061	1	0.228	2.27086e-05	2	NGRN
6.99344e-10	2.54027	0.75	0.089	2.34546e-05	2	LINC01727
7.04982e-10	3.71085	0.917	0.198	2.36437e-05	2	C18orf63
7.49695e-10	3.96465	0.917	0.178	2.51433e-05	2	SH2D6
7.53912e-10	3.04634	0.917	0.168	2.52847e-05	2	KCNA1
7.89496e-10	2.70311	0.667	0.059	2.64781e-05	2	C2CD4A
7.89496e-10	2.66149	0.667	0.059	2.64781e-05	2	ENTPD2
7.90384e-10	3.02909	0.917	0.188	2.65079e-05	2	LINC01722
8.14669e-10	3.08488	0.917	0.168	2.73224e-05	2	AOC1
8.17744e-10	1.27156	0.833	0.119	2.74255e-05	2	AC003973.2
8.41059e-10	3.10717	0.75	0.089	2.82075e-05	2	LRRC74A
8.90121e-10	2.4711	0.833	0.119	2.98529e-05	2	CLEC4E
1.05357e-09	3.45227	0.833	0.129	3.53347e-05	2	GSN-AS1
1.05357e-09	3.12811	0.833	0.129	3.53347e-05	2	HOXA3
1.0541e-09	2.36711	0.833	0.119	3.53523e-05	2	LILRB5
1.07202e-09	1.87557	0.75	0.079	3.59534e-05	2	FGB
1.07286e-09	2.56873	0.667	0.059	3.59817e-05	2	CT45A1
1.10752e-09	2.76159	0.75	0.089	3.71438e-05	2	CLEC12A
1.18773e-09	2.67065	0.667	0.059	3.98341e-05	2	AC087258.1
1.24739e-09	1.98515	0.833	0.119	4.18351e-05	2	CASP14
1.24911e-09	3.08116	1	0.208	4.18928e-05	2	AC008467.1
1.31456e-09	2.40422	0.667	0.059	4.40876e-05	2	LINC00589
1.35659e-09	2.18353	0.833	0.119	4.54974e-05	2	COL10A1
1.37119e-09	2.42439	1	0.218	4.5987e-05	2	EDDM13
1.44042e-09	3.33418	0.917	0.188	4.83089e-05	2	TGFBR2
1.45255e-09	3.17944	1	0.267	4.87155e-05	2	WDR64
1.54109e-09	3.27207	0.833	0.139	5.1685e-05	2	FCRL4
1.58097e-09	3.5338	0.833	0.149	5.30225e-05	2	RAD54L
1.58409e-09	3.03465	1	0.277	5.31271e-05	2	SLC4A10
1.59129e-09	3.02798	0.833	0.129	5.33686e-05	2	LINC00917
1.60903e-09	1.80087	0.667	0.059	5.39636e-05	2	ELOA2
1.66515e-09	4.04403	1	0.248	5.58458e-05	2	SI
1.67126e-09	2.84937	0.917	0.188	5.60506e-05	2	SLC17A8
1.71542e-09	3.89549	0.833	0.158	5.75317e-05	2	LINC00452
1.71555e-09	2.58408	0.75	0.099	5.7536e-05	2	ANKRD62
1.72613e-09	1.81522	0.917	0.178	5.7891e-05	2	ZFP2
2.00185e-09	3.60901	0.667	0.069	6.71381e-05	2	PRSS56
2.07345e-09	3.41112	1	0.277	6.95392e-05	2	LUZP2
2.12581e-09	2.50851	1	0.257	7.12956e-05	2	TTLL6
2.34883e-09	2.62572	1	0.248	7.8775e-05	2	NPR1
2.37054e-09	3.36964	1	0.277	7.95031e-05	2	NPC1L1
2.43068e-09	3.03417	0.667	0.069	8.15202e-05	2	AL031123.2
2.43068e-09	2.82284	0.667	0.069	8.15202e-05	2	WNT10B
2.50045e-09	1.98976	0.75	0.089	8.386e-05	2	LINC00924
2.67742e-09	2.52293	0.667	0.069	8.97954e-05	2	NPY5R
2.73557e-09	4.27382	0.75	0.109	9.17457e-05	2	LINC01747
2.73557e-09	2.75021	0.75	0.109	9.17457e-05	2	LINC02447
2.79935e-09	2.78635	0.917	0.188	9.38847e-05	2	NXPE1
2.84358e-09	4.35916	0.917	0.218	9.53681e-05	2	LPA
2.9485e-09	3.21284	0.667	0.069	9.88867e-05	2	C1orf94
2.96991e-09	3.51236	0.833	0.149	9.96049e-05	2	ZNF683
3.24478e-09	3.00638	0.75	0.109	0.000108823	2	LINC00559
3.24622e-09	2.75438	0.667	0.069	0.000108872	2	LINC02183
3.26523e-09	2.72612	1	0.267	0.000109509	2	P2RX7
3.27857e-09	3.3465	1	0.327	0.000109957	2	ESRRG
3.40043e-09	4.29444	0.667	0.079	0.000114044	2	FAM216B
3.42746e-09	2.81152	0.833	0.139	0.00011495	2	LINC00658
3.53265e-09	3.10775	1	0.277	0.000118478	2	ADGRG4
3.53288e-09	3.91889	0.75	0.109	0.000118486	2	LINC01677
3.53288e-09	3.04057	0.75	0.109	0.000118486	2	AC007114.2
3.78106e-09	3.20047	1	0.287	0.000126809	2	HIVEP2
3.80404e-09	3.49216	0.75	0.119	0.00012758	2	FGG
3.93202e-09	2.60595	0.667	0.069	0.000131872	2	LINC02507
4.18569e-09	3.71508	0.75	0.109	0.00014038	2	HTN1
4.18569e-09	3.12992	0.75	0.109	0.00014038	2	AC020743.2
4.20306e-09	1.41052	0.917	0.178	0.000140962	2	PPP5D1
4.3313e-09	3.35644	0.833	0.158	0.000145263	2	KCNMA1-AS1
4.34224e-09	2.89573	0.833	0.139	0.00014563	2	OR14J1
4.65197e-09	4.23356	0.917	0.218	0.000156018	2	CDHR2
4.69696e-09	2.75088	0.833	0.139	0.000157527	2	TCAF2
4.9304e-09	3.81469	0.667	0.079	0.000165356	2	CLEC4F
5.113e-09	3.38802	0.833	0.149	0.00017148	2	KLHL33
5.19659e-09	3.14685	1	0.267	0.000174283	2	NCAN
5.19659e-09	3.13141	1	0.267	0.000174283	2	GLT1D1
5.29543e-09	3.12311	1	0.317	0.000177598	2	AC007614.1
5.43151e-09	3.57438	0.917	0.208	0.000182162	2	ASB18
5.43151e-09	2.66921	0.917	0.208	0.000182162	2	SEC14L3
5.44374e-09	4.024	0.917	0.198	0.000182572	2	SIRPB2
5.44604e-09	3.93541	0.917	0.248	0.000182649	2	MUC22
5.47724e-09	4.7146	0.917	0.257	0.000183696	2	GRIN3A
5.52207e-09	3.30817	0.833	0.149	0.000185199	2	VNN3
5.75204e-09	1.43496	0.667	0.069	0.000192912	2	ANKRD61
5.80089e-09	2.61004	0.75	0.099	0.00019455	2	MUC7
5.862e-09	3.67021	0.75	0.109	0.0001966	2	AC021242.2
5.862e-09	3.23443	0.75	0.109	0.0001966	2	LINC02102
5.86862e-09	2.71365	0.833	0.158	0.000196822	2	DACT3
5.9629e-09	2.75441	0.833	0.149	0.000199984	2	AC000403.1
5.97427e-09	1.96154	1	0.277	0.000200365	2	MVD
6.24577e-09	3.15074	0.833	0.178	0.000209471	2	MYB
6.31883e-09	2.17557	0.75	0.099	0.000211921	2	FOXD2
6.4379e-09	2.2524	0.833	0.149	0.000215914	2	TAPBPL
6.77744e-09	4.0709	0.75	0.119	0.000227302	2	LINC00494
6.88165e-09	2.46443	0.75	0.099	0.000230797	2	AC048382.5
6.92926e-09	2.70593	0.75	0.109	0.000232393	2	PSG11
6.94689e-09	0.978813	0.667	0.069	0.000232985	2	AC093495.1
6.94962e-09	2.62306	0.833	0.149	0.000233076	2	FBXO39
7.12245e-09	3.59043	0.667	0.079	0.000238873	2	PHGR1
7.53152e-09	2.88861	0.75	0.109	0.000252592	2	MFRP
7.70652e-09	3.16602	0.917	0.208	0.000258461	2	SFTPB
7.98012e-09	4.16763	0.75	0.119	0.000267637	2	MAGEE1
8.09442e-09	1.3403	0.833	0.149	0.000271471	2	TESK1
8.10079e-09	2.88569	0.917	0.218	0.000271684	2	EPHA3
8.10207e-09	1.77964	1	0.257	0.000271727	2	SULT1B1
8.15725e-09	3.10827	0.75	0.099	0.000273578	2	AC073530.1
8.54876e-09	3.61467	0.667	0.079	0.000286708	2	GLYATL2
8.65689e-09	3.51619	0.75	0.119	0.000290335	2	AL355602.1
8.65689e-09	3.30623	0.75	0.119	0.000290335	2	PCDHGA9
8.73361e-09	2.54895	0.833	0.149	0.000292908	2	KCNV1
9.21262e-09	2.89874	0.833	0.158	0.000308973	2	PLCE1-AS2
9.23762e-09	3.9167	0.917	0.267	0.000309811	2	ACSL6
9.36246e-09	3.81286	0.667	0.079	0.000313998	2	LINC01676
9.36246e-09	2.89186	0.667	0.079	0.000313998	2	LINC01739
9.36246e-09	2.89031	0.667	0.079	0.000313998	2	LECT2
9.38933e-09	2.25377	0.75	0.119	0.000314899	2	ASB4
9.49124e-09	2.72845	0.917	0.208	0.000318317	2	HFM1
9.83906e-09	3.96189	0.917	0.307	0.000329982	2	SCN3B
9.92631e-09	3.74285	0.833	0.158	0.000332909	2	AC008938.1
9.97566e-09	3.16811	1	0.287	0.000334564	2	PCDHA4
1.01032e-08	2.03996	0.667	0.069	0.000338842	2	PLVAP
1.02512e-08	2.86283	0.667	0.079	0.000343806	2	PCDHB15
1.04367e-08	3.3188	0.75	0.129	0.000350024	2	UBQLNL
1.04843e-08	3.11006	1	0.366	0.000351624	2	AGBL4
1.05205e-08	3.15067	1	0.356	0.000352835	2	C2orf16
1.05273e-08	3.22412	0.917	0.238	0.000353066	2	LINC01568
1.09597e-08	2.35368	0.833	0.149	0.000367567	2	OR5H14
1.0966e-08	3.62207	0.833	0.198	0.000367777	2	ZDHHC8
1.11665e-08	4.02721	0.917	0.307	0.000374502	2	AL138889.1
1.13924e-08	2.86302	0.75	0.109	0.000382079	2	OR11A1
1.14343e-08	2.38469	0.75	0.099	0.000383482	2	SLC26A4-AS1
1.18176e-08	2.88839	0.833	0.149	0.000396338	2	GRM3
1.18941e-08	3.63756	0.667	0.089	0.000398905	2	PIP5KL1
1.19667e-08	2.94863	0.75	0.119	0.000401338	2	AL157786.1
1.19978e-08	2.75582	1	0.317	0.000402382	2	CRTC1
1.22285e-08	2.91115	0.75	0.129	0.000410119	2	LINC01539
1.29857e-08	3.32537	0.667	0.089	0.000435514	2	PCDHGA1
1.31726e-08	3.69282	1	0.307	0.000441782	2	CD6
1.33947e-08	2.37783	0.917	0.208	0.000449232	2	PLA2G4D
1.34254e-08	2.75871	0.75	0.109	0.000450263	2	PNLIPRP3
1.34895e-08	1.33902	1	0.297	0.000452412	2	GLI2
1.36523e-08	3.61761	0.917	0.267	0.000457871	2	ADCY8
1.37334e-08	3.02272	0.833	0.149	0.000460592	2	HTR3A
1.4054e-08	3.31036	0.75	0.119	0.000471343	2	AKR1B10
1.47002e-08	3.06594	0.667	0.079	0.000493016	2	OSMR-AS1
1.47002e-08	2.85832	0.667	0.079	0.000493016	2	HDDC3
1.51222e-08	2.7952	1	0.347	0.000507169	2	ACSBG1
1.54683e-08	3.42379	0.667	0.089	0.000518778	2	AL031118.1
1.56983e-08	3.38609	0.917	0.238	0.00052649	2	LINC02395
1.66621e-08	3.49212	0.833	0.158	0.000558812	2	DRC1
1.66621e-08	2.83007	0.833	0.158	0.000558812	2	TSPAN2
1.66807e-08	2.24437	0.917	0.198	0.000559436	2	CLEC17A
1.68768e-08	4.26373	0.667	0.089	0.000566016	2	C12orf80
1.70817e-08	3.03156	0.833	0.168	0.000572887	2	CORO2B
1.71317e-08	3.23376	0.917	0.218	0.000574562	2	SCN4B
1.76712e-08	3.4586	0.917	0.267	0.000592656	2	GPSM1
1.78625e-08	1.95475	0.75	0.119	0.000599072	2	CCR4
1.78625e-08	1.53651	0.75	0.119	0.000599072	2	PPP1R32
1.79435e-08	3.9251	0.75	0.139	0.000601789	2	FRS3
1.80104e-08	3.02101	1	0.337	0.000604031	2	CDH4
1.83943e-08	3.61257	0.917	0.277	0.000616908	2	TSNARE1
1.86019e-08	2.65169	0.75	0.109	0.000623871	2	AF121898.1
1.87665e-08	2.23146	0.833	0.139	0.00062939	2	TMPRSS11F
1.88405e-08	3.78224	0.917	0.208	0.000631872	2	GBP5
1.88908e-08	3.20772	1	0.376	0.000633558	2	PKN2-AS1
1.9128e-08	3.06548	0.917	0.257	0.000641516	2	C3orf20
1.9217e-08	1.75944	0.667	0.079	0.0006445	2	AC068831.7
1.92311e-08	3.11264	0.917	0.248	0.000644971	2	FNDC1
1.92607e-08	2.94413	1	0.347	0.000645965	2	VWA3B
1.96732e-08	4.18082	1	0.386	0.000659799	2	COL6A5
2.00771e-08	2.54655	0.667	0.089	0.000673346	2	TEX13C
2.00902e-08	2.09097	1	0.257	0.000673784	2	TMPRSS6
2.04976e-08	1.58086	0.917	0.198	0.000687449	2	RGS8
2.09075e-08	2.50994	1	0.317	0.000701194	2	PAMR1
2.09164e-08	3.25269	0.75	0.139	0.000701496	2	LRFN5
2.09397e-08	3.23077	0.75	0.119	0.000702276	2	ZNF32-AS3
2.10026e-08	3.32218	0.667	0.079	0.000704385	2	LINC01250
2.1328e-08	2.90959	1	0.327	0.000715297	2	CDHR1
2.14173e-08	2.81333	0.917	0.267	0.000718294	2	KANK4
2.17233e-08	2.34174	1	0.347	0.000728555	2	COL9A1
2.18909e-08	3.19749	0.667	0.089	0.000734177	2	AC108471.2
2.27888e-08	2.86925	0.833	0.168	0.00076429	2	DCST2
2.28294e-08	3.57682	0.917	0.267	0.000765652	2	MAN2C1
2.31187e-08	2.39628	0.833	0.149	0.000775354	2	LINC00900
2.32104e-08	3.34573	0.917	0.257	0.00077843	2	TSIX
2.33746e-08	2.7135	0.917	0.248	0.000783938	2	CLVS2
2.37078e-08	3.9418	0.917	0.277	0.000795112	2	ALDH1L2
2.4009e-08	2.08436	0.833	0.158	0.000805215	2	ASPA
2.42525e-08	2.91853	0.833	0.188	0.00081338	2	AC099792.1
2.46929e-08	1.57652	0.917	0.208	0.00082815	2	PRPF40B
2.47297e-08	2.87345	0.75	0.129	0.000829383	2	GNAS-AS1
2.53075e-08	2.87267	0.833	0.198	0.000848762	2	GLRA3
2.60078e-08	2.62674	0.667	0.089	0.000872251	2	AC093895.1
2.62257e-08	3.44318	0.917	0.228	0.000879556	2	TRPM5
2.62257e-08	3.38974	0.917	0.228	0.000879556	2	CACNG8
2.6298e-08	2.49322	0.833	0.168	0.000881981	2	HCN3
2.6541e-08	3.14256	0.75	0.119	0.000890131	2	CCL22
2.6541e-08	2.99093	0.75	0.119	0.000890131	2	LINC02211
2.6541e-08	2.90809	0.75	0.119	0.000890131	2	KCNJ11
2.67188e-08	3.29825	0.75	0.129	0.000896095	2	ONECUT1
2.71764e-08	3.42193	1	0.327	0.000911441	2	BAHCC1
2.82716e-08	2.46326	0.833	0.178	0.000948174	2	NOMO3
2.82731e-08	3.22277	0.667	0.099	0.000948223	2	RSPH6A
2.83555e-08	2.22478	1	0.317	0.000950987	2	PRKCZ
2.83634e-08	3.47575	0.75	0.139	0.000951252	2	ENAM
2.87126e-08	3.09495	0.75	0.119	0.000962964	2	LINC00482
2.92925e-08	2.70608	1	0.347	0.000982411	2	GALNT16
3.0241e-08	4.23461	0.917	0.307	0.00101422	2	TMC2
3.03292e-08	1.52105	0.833	0.168	0.00101718	2	LINC00645
3.05943e-08	3.3888	0.75	0.139	0.00102607	2	SPACA6
3.10562e-08	2.08795	0.75	0.119	0.00104156	2	LRRC73
3.13592e-08	2.75712	0.917	0.267	0.00105172	2	LINC00635
3.28851e-08	3.22459	1	0.356	0.0011029	2	RIMS1
3.33148e-08	2.67437	1	0.277	0.00111731	2	MYPN
3.3585e-08	2.30683	0.75	0.119	0.00112637	2	SERPINA9
3.4063e-08	3.62862	0.917	0.257	0.00114241	2	SCML4
3.44614e-08	2.21849	0.833	0.158	0.00115577	2	ZPBP
3.48924e-08	2.85636	0.833	0.178	0.00117022	2	LILRA1
3.49016e-08	2.8711	1	0.337	0.00117053	2	NRXN2
3.49016e-08	2.45306	1	0.337	0.00117053	2	SBNO2
3.56605e-08	2.31594	0.917	0.218	0.00119598	2	SUSD2
3.63099e-08	4.02225	0.667	0.099	0.00121776	2	CNIH2
3.67952e-08	3.25739	0.917	0.277	0.00123404	2	FAP
3.69955e-08	2.28243	1	0.356	0.00124075	2	PLXDC1
3.70223e-08	3.72024	1	0.465	0.00124165	2	CNTN2
3.74165e-08	3.36016	0.833	0.178	0.00125487	2	AL137067.1
3.74165e-08	2.37984	0.833	0.178	0.00125487	2	TBR1
3.82233e-08	3.32075	1	0.376	0.00128193	2	OTOF
3.83568e-08	3.01679	0.75	0.139	0.00128641	2	LGI4
3.91165e-08	3.21971	0.917	0.248	0.00131189	2	KCNJ15
3.92554e-08	2.23464	0.75	0.119	0.00131655	2	TNFSF13B
3.94513e-08	2.75666	0.667	0.099	0.00132312	2	C10orf25
3.97781e-08	2.30599	0.833	0.158	0.00133408	2	XPC
3.97781e-08	1.99194	0.833	0.158	0.00133408	2	CLEC7A
3.98608e-08	3.0401	0.667	0.089	0.00133685	2	LINC00484
4.07262e-08	1.3517	1	0.317	0.00136588	2	PIP5K1A
4.11976e-08	3.13509	0.917	0.257	0.00138169	2	ANKUB1
4.13455e-08	2.04955	0.75	0.139	0.00138665	2	DNTT
4.17901e-08	3.17773	0.917	0.238	0.00140155	2	AC005699.1
4.28556e-08	2.79821	0.667	0.099	0.00143729	2	SHCBP1L
4.33861e-08	2.63482	0.667	0.089	0.00145508	2	FAM170A
4.36145e-08	2.93695	1	0.297	0.00146274	2	SP140
4.3883e-08	3.03915	0.917	0.257	0.00147175	2	CDKL1
4.43196e-08	3.07269	1	0.347	0.00148639	2	PLA2R1
4.48949e-08	1.30366	0.75	0.109	0.00150569	2	LINC00158
4.51841e-08	3.42452	0.833	0.188	0.00151538	2	C6orf222
4.6341e-08	1.03858	1	0.297	0.00155419	2	STPG2
4.63555e-08	2.40356	0.833	0.168	0.00155467	2	CCDC62
4.64934e-08	3.00695	1	0.446	0.0015593	2	CARMN
4.6544e-08	2.88158	0.667	0.099	0.00156099	2	CADM3
4.67634e-08	4.21392	0.833	0.198	0.00156835	2	LILRA6
4.70006e-08	2.61438	1	0.347	0.00157631	2	CDH7
4.71976e-08	2.13311	0.917	0.228	0.00158291	2	AC058791.1
4.72128e-08	2.93755	0.667	0.089	0.00158342	2	WNT16
4.77338e-08	3.62356	0.833	0.208	0.0016009	2	AL021877.2
4.81069e-08	1.94441	0.917	0.208	0.00161341	2	LINC00664
4.826e-08	3.19141	0.667	0.109	0.00161854	2	SPEF1
4.83838e-08	2.24361	0.833	0.188	0.0016227	2	LACTB2-AS1
4.86637e-08	2.83077	0.917	0.267	0.00163208	2	PDE3B
4.97255e-08	3.54152	0.833	0.168	0.00166769	2	TMEM184A
5.06572e-08	2.69789	0.917	0.238	0.00169894	2	CSF2RB
5.13805e-08	2.73465	1	0.396	0.0017232	2	DCDC1
5.23027e-08	3.55809	0.667	0.109	0.00175413	2	GOLGA8M
5.2938e-08	2.65024	0.833	0.178	0.00177543	2	AP000866.1
5.29972e-08	2.32615	0.917	0.257	0.00177742	2	IQANK1
5.31803e-08	1.76974	0.75	0.129	0.00178356	2	RSPH10B2
5.37052e-08	1.61408	0.917	0.228	0.00180117	2	FAM83A
5.45438e-08	3.44512	0.917	0.287	0.00182929	2	CRTAC1
5.48662e-08	3.21946	0.667	0.099	0.0018401	2	LINC01423
5.48662e-08	3.04395	0.667	0.099	0.0018401	2	ZBTB7B
5.54551e-08	2.94965	0.833	0.188	0.00185985	2	LEKR1
5.57226e-08	2.6131	0.75	0.139	0.00186882	2	CHRM3-AS2
5.59579e-08	3.70176	1	0.386	0.00187671	2	IL16
5.67175e-08	2.59231	0.833	0.178	0.00190219	2	AC072062.1
5.67861e-08	2.89912	0.833	0.158	0.00190449	2	SLC26A3
5.71377e-08	3.66406	0.75	0.149	0.00191628	2	PSG5
5.71922e-08	2.30666	0.833	0.168	0.00191811	2	P2RX6
5.71922e-08	1.42823	0.833	0.168	0.00191811	2	MMP20
5.90264e-08	2.19823	1	0.327	0.00197963	2	TMC1
5.9551e-08	3.92916	0.667	0.099	0.00199722	2	GSTA5
5.99843e-08	2.69085	1	0.416	0.00201175	2	KDM4C
6.00132e-08	2.46524	0.75	0.139	0.00201272	2	LINC02109
6.00658e-08	4.47475	0.917	0.257	0.00201449	2	BIRC3
6.00658e-08	2.39966	0.917	0.257	0.00201449	2	PTPRZ1
6.03815e-08	3.45993	0.917	0.277	0.00202507	2	ABCG1
6.12126e-08	4.17275	0.833	0.198	0.00205295	2	VSTM2A
6.18496e-08	2.3398	0.75	0.129	0.00207431	2	PRR27
6.26081e-08	1.79194	1	0.327	0.00209975	2	MARCH1
6.46225e-08	3.91833	0.667	0.099	0.00216731	2	TECRL
6.49445e-08	3.42562	0.917	0.248	0.00217811	2	ATP4A
6.53584e-08	2.10506	0.917	0.238	0.00219199	2	COL21A1
6.54521e-08	2.10858	0.833	0.198	0.00219513	2	LPAR1
6.60616e-08	2.10371	0.667	0.089	0.00221558	2	AC004112.1
6.71172e-08	2.84372	1	0.416	0.00225098	2	KCNJ6
6.92752e-08	3.3442	1	0.366	0.00232335	2	ATP10B
6.96354e-08	2.77076	0.917	0.238	0.00233543	2	AL109976.1
6.96354e-08	2.40156	0.917	0.238	0.00233543	2	ADAM18
7.01114e-08	2.75525	0.667	0.099	0.00235139	2	OR4S2
7.10807e-08	2.94385	0.833	0.208	0.00238391	2	ABCB11
7.18813e-08	2.24527	0.75	0.129	0.00241075	2	CNGA4
7.24091e-08	3.04466	0.917	0.257	0.00242846	2	CACNA1F
7.25655e-08	2.3962	0.917	0.277	0.0024337	2	COL5A2
7.30629e-08	2.18736	0.917	0.218	0.00245038	2	SMO
7.4183e-08	2.40776	0.917	0.238	0.00248795	2	FREM3
7.46237e-08	3.22789	0.833	0.178	0.00250273	2	DOK3
7.46237e-08	3.02206	0.833	0.178	0.00250273	2	LINC00265
7.48943e-08	2.6743	0.75	0.139	0.0025118	2	VRTN
7.60506e-08	2.88337	0.667	0.099	0.00255058	2	GOT1L1
7.61201e-08	4.05018	0.833	0.218	0.00255292	2	FAM47E
7.64088e-08	2.76139	0.75	0.149	0.0025626	2	LINC01360
7.79671e-08	3.2385	0.667	0.109	0.00261486	2	ITGBL1
7.82894e-08	2.74843	1	0.317	0.00262567	2	SMTN
7.82894e-08	1.91273	1	0.317	0.00262567	2	PAK3
7.84967e-08	1.74307	0.75	0.119	0.00263262	2	AC018692.1
7.98927e-08	2.44022	0.833	0.178	0.00267944	2	ANKRD30A
7.99476e-08	2.88795	0.833	0.198	0.00268128	2	KCNMB1
8.10811e-08	3.01144	0.833	0.208	0.0027193	2	MAST1
8.21333e-08	2.94137	0.75	0.149	0.00275459	2	TSPAN8
8.21336e-08	3.54317	0.75	0.158	0.0027546	2	C11orf87
8.24757e-08	3.601	0.667	0.099	0.00276607	2	RSPO4
8.321e-08	2.76556	0.833	0.188	0.0027907	2	TNFRSF8
8.34811e-08	2.88393	0.75	0.129	0.00279979	2	LGSN
8.34811e-08	2.24511	0.75	0.129	0.00279979	2	CD28
8.39164e-08	2.59271	1	0.327	0.00281439	2	FYB1
8.40626e-08	2.116	0.917	0.228	0.00281929	2	AL031772.1
8.47954e-08	2.97621	0.667	0.089	0.00284387	2	GCSAM
8.48874e-08	6.48473	0.917	0.267	0.00284696	2	DPP4
8.53783e-08	2.9452	1	0.376	0.00286342	2	UMODL1
8.73273e-08	2.98676	1	0.406	0.00292878	2	NBEAL2
8.82721e-08	2.99799	0.75	0.149	0.00296047	2	THEGL
8.89508e-08	3.36135	1	0.327	0.00298323	2	ADGRF5
8.89877e-08	2.70793	0.833	0.188	0.00298447	2	ALDH1A3
8.97195e-08	3.43386	1	0.426	0.00300901	2	SH3TC2
8.99413e-08	1.79889	0.75	0.129	0.00301645	2	AL606970.3
8.99413e-08	1.04516	0.75	0.129	0.00301645	2	LRRC56
9.1831e-08	0.81188	0.667	0.079	0.00307983	2	AL355607.2
9.3322e-08	3.51891	0.75	0.139	0.00312983	2	CCDC116
9.3322e-08	3.45294	0.75	0.139	0.00312983	2	AC012085.2
9.3322e-08	2.24106	0.75	0.139	0.00312983	2	LINC01949
9.33501e-08	3.15019	0.917	0.327	0.00313077	2	LY9
9.37988e-08	3.6002	1	0.416	0.00314582	2	FCGBP
9.54233e-08	2.35213	0.917	0.238	0.00320031	2	ITGAD
9.5609e-08	2.10829	1	0.376	0.00320653	2	NUP210L
9.68844e-08	2.44052	0.75	0.129	0.00324931	2	ETV4
9.68844e-08	2.13646	0.75	0.129	0.00324931	2	OSBPL10-AS1
9.694e-08	2.29471	0.667	0.099	0.00325117	2	TMEM212
9.694e-08	1.78308	0.667	0.099	0.00325117	2	TMEM100
9.83457e-08	3.22197	0.917	0.277	0.00329832	2	CNTN1
9.88344e-08	2.699	0.667	0.109	0.00331471	2	DUOXA2
1.0191e-07	4.15704	0.75	0.149	0.00341786	2	OR2L2
1.01967e-07	2.79426	0.917	0.267	0.00341975	2	ZIC4
1.03962e-07	3.76021	0.833	0.228	0.00348668	2	CHST9
1.04474e-07	3.93333	0.917	0.277	0.00350385	2	CCDC187
1.05065e-07	2.74613	0.667	0.099	0.00352366	2	SPACA6P-AS
1.05216e-07	2.1508	0.833	0.149	0.00352873	2	F9
1.05223e-07	2.51504	0.833	0.218	0.00352897	2	CPB1
1.06619e-07	3.29292	1	0.446	0.0035758	2	LINC01934
1.06922e-07	4.27375	0.667	0.109	0.00358596	2	GAS2L2
1.07039e-07	3.32193	0.917	0.307	0.00358986	2	ANKRD33B
1.07039e-07	2.00542	1	0.297	0.00358986	2	SLC38A6
1.07329e-07	2.39625	0.917	0.218	0.00359958	2	ARHGAP24
1.08748e-07	3.23313	0.833	0.188	0.00364719	2	ESPNL
1.08748e-07	2.36757	0.833	0.188	0.00364719	2	SLC38A4
1.09249e-07	3.18709	1	0.366	0.00366401	2	OTUD7A
1.09473e-07	3.3343	0.75	0.149	0.00367151	2	MEP1B
1.09473e-07	1.70333	0.75	0.149	0.00367151	2	OBSCN-AS1
1.11517e-07	2.90728	0.917	0.257	0.00374004	2	KCNT2
1.1236e-07	2.17039	0.75	0.129	0.00376834	2	MICA
1.12409e-07	3.02132	0.833	0.208	0.00376998	2	KCNJ10
1.13212e-07	3.09888	1	0.376	0.00379691	2	RPS6KA1
1.13846e-07	2.11706	0.667	0.099	0.00381818	2	AC092145.1
1.15105e-07	3.27141	0.917	0.238	0.00386039	2	PROM2
1.18555e-07	2.71771	0.917	0.257	0.00397611	2	SEMA3F
1.19937e-07	0.92857	0.833	0.178	0.00402243	2	LRRTM3
1.2097e-07	2.88173	0.75	0.129	0.00405709	2	AC102953.2
1.22351e-07	3.43339	0.917	0.267	0.0041034	2	TSPAN18
1.22351e-07	2.84413	0.917	0.267	0.0041034	2	VAV1
1.23068e-07	2.7313	1	0.307	0.00412745	2	NFATC2
1.23337e-07	2.99328	0.667	0.099	0.00413646	2	NOTO
1.23337e-07	2.19893	0.667	0.099	0.00413646	2	SFTPD-AS1
1.23337e-07	1.80878	0.667	0.099	0.00413646	2	AC083805.1
1.24214e-07	1.75774	0.833	0.188	0.0041659	2	TTLL8
1.24888e-07	2.83516	0.917	0.327	0.00418848	2	CCDC85C
1.25063e-07	4.27691	0.667	0.109	0.00419436	2	TSPYL6
1.25426e-07	3.07464	0.75	0.158	0.00420655	2	MAB21L3
1.2781e-07	3.08714	0.917	0.297	0.00428648	2	DAPK2
1.27992e-07	2.16899	0.667	0.089	0.00429261	2	GPIHBP1
1.28734e-07	3.69415	0.917	0.248	0.00431749	2	KIR3DX1
1.30351e-07	1.41589	0.917	0.238	0.00437172	2	MS4A4A
1.3233e-07	2.79478	1	0.317	0.00443808	2	ADCY10
1.32895e-07	2.97605	0.917	0.277	0.00445703	2	C8orf74
1.3359e-07	3.29348	0.667	0.099	0.00448035	2	GOLGA6C
1.3359e-07	3.19872	0.667	0.099	0.00448035	2	AC091170.1
1.3359e-07	2.58201	0.667	0.099	0.00448035	2	SLC45A2
1.3359e-07	2.32393	0.667	0.099	0.00448035	2	RPE65
1.33945e-07	1.88335	0.917	0.257	0.00449226	2	AL450992.1
1.35216e-07	2.84373	0.667	0.109	0.00453489	2	SCG3
1.35216e-07	2.59554	0.667	0.109	0.00453489	2	PCDHGB3
1.35415e-07	3.15957	0.917	0.307	0.00454153	2	GRAMD2A
1.36857e-07	2.41489	1	0.366	0.0045899	2	RIMS4
1.36895e-07	3.13935	0.917	0.248	0.00459118	2	SCART1
1.42348e-07	2.03577	0.917	0.257	0.00477407	2	PIK3C2G
1.42628e-07	2.86916	1	0.554	0.00478345	2	KSR2
1.43574e-07	3.23257	0.917	0.307	0.00481518	2	ZDHHC11B
1.44253e-07	3.03074	0.75	0.158	0.00483795	2	TAP2
1.44603e-07	2.33859	0.833	0.198	0.0048497	2	C1orf216
1.44666e-07	2.12436	0.667	0.099	0.00485181	2	AL358975.1
1.46165e-07	3.47796	0.667	0.109	0.00490209	2	AC109811.1
1.46165e-07	2.84164	0.667	0.109	0.00490209	2	LINC01586
1.47054e-07	2.57264	1	0.426	0.0049319	2	SCN2A
1.48523e-07	3.12581	0.917	0.327	0.00498117	2	ABCB5
1.4917e-07	2.22617	1	0.396	0.00500287	2	DLGAP1
1.51472e-07	2.48076	0.833	0.188	0.00508005	2	FAM189A1
1.51908e-07	3.56981	1	0.406	0.00509471	2	KIF21B
1.52077e-07	3.10151	1	0.475	0.00510035	2	FBN2
1.55311e-07	2.76165	0.833	0.208	0.00520883	2	BLK
1.55685e-07	2.93162	1	0.356	0.00522137	2	UBAP1L
1.56941e-07	2.32333	0.917	0.238	0.00526349	2	SLC22A18
1.57474e-07	2.92022	1	0.347	0.00528137	2	UNC5D
1.57969e-07	2.26076	0.667	0.109	0.00529797	2	CX3CR1
1.58302e-07	3.33687	1	0.376	0.00530914	2	AP3B2
1.60468e-07	2.72996	1	0.406	0.00538178	2	KCNA2
1.61781e-07	2.25194	0.833	0.188	0.0054258	2	ARHGEF15
1.61937e-07	3.05687	0.833	0.228	0.00543106	2	ELOVL7
1.6464e-07	2.48405	0.833	0.218	0.00552168	2	BANK1
1.65799e-07	3.30113	0.75	0.158	0.00556056	2	GLP1R
1.65799e-07	2.82034	0.75	0.158	0.00556056	2	LINC00861
1.66529e-07	2.41435	0.75	0.139	0.00558506	2	AC011632.1
1.67339e-07	6.98479	1	0.376	0.00561222	2	AL390957.1
1.67625e-07	2.13185	1	0.337	0.00562182	2	TP73
1.67626e-07	3.1748	0.75	0.149	0.00562185	2	FCAR
1.67626e-07	2.94419	0.75	0.149	0.00562185	2	SMIM2-AS1
1.67626e-07	2.88187	0.75	0.149	0.00562185	2	TMEM72-AS1
1.67626e-07	2.45585	0.75	0.149	0.00562185	2	OR2F1
1.69543e-07	2.87078	0.667	0.099	0.00568615	2	PLA2G3
1.70761e-07	3.37905	0.917	0.287	0.00572697	2	COL8A1
1.71385e-07	2.31777	0.833	0.168	0.00574789	2	DACH2
1.72033e-07	2.60853	1	0.386	0.00576964	2	CCDC141
1.72837e-07	1.07191	0.833	0.158	0.0057966	2	LINC02009
1.75419e-07	3.1953	0.833	0.218	0.00588321	2	TLR6
1.75593e-07	3.35947	0.917	0.267	0.00588905	2	CD34
1.77708e-07	3.02469	0.75	0.158	0.00595996	2	TRABD
1.78737e-07	3.04912	1	0.574	0.00599449	2	FRY
1.78894e-07	3.60043	0.75	0.139	0.00599976	2	HIST1H2BN
1.79056e-07	2.06066	0.917	0.277	0.00600518	2	MAP3K12
1.79407e-07	2.60822	0.917	0.317	0.00601695	2	ABCB9
1.81123e-07	4.09659	0.917	0.287	0.0060745	2	AL356417.3
1.81229e-07	2.90901	0.917	0.307	0.00607805	2	PTPRO
1.81265e-07	2.37158	1	0.416	0.00607928	2	FLT1
1.81432e-07	2.6762	1	0.495	0.00608487	2	FAM135B
1.83199e-07	2.78164	1	0.446	0.00614412	2	FHAD1
1.85045e-07	3.36199	0.75	0.168	0.00620602	2	SEC14L4
1.85096e-07	3.52759	1	0.485	0.00620774	2	TENM2
1.86852e-07	2.5762	1	0.317	0.00626663	2	ADPRHL1
1.8688e-07	3.03101	0.833	0.218	0.00626758	2	CFAP99
1.88225e-07	3.1998	1	0.574	0.0063127	2	LINC00598
1.88249e-07	2.39698	0.833	0.208	0.0063135	2	MPP3
1.89997e-07	2.26927	0.917	0.228	0.00637213	2	HSD17B2
1.90441e-07	2.623	0.75	0.158	0.00638702	2	PNPLA3
1.92145e-07	2.75507	0.75	0.139	0.00644415	2	DUSP13
1.92952e-07	2.81085	0.75	0.149	0.00647122	2	CEACAM3
1.92952e-07	2.35077	0.75	0.149	0.00647122	2	VAMP1
1.94615e-07	3.53509	0.833	0.248	0.00652699	2	HGF
1.98534e-07	1.38707	0.667	0.099	0.00665843	2	AL359317.2
1.99178e-07	3.57078	0.667	0.109	0.00668003	2	AC008125.1
1.99178e-07	3.37573	0.667	0.109	0.00668003	2	LINC01920
2.00992e-07	2.91828	1	0.465	0.00674088	2	COL19A1
2.02737e-07	4.11996	0.75	0.178	0.00679938	2	RASSF6
2.03475e-07	3.06231	0.917	0.307	0.00682416	2	MAN2A2
2.03532e-07	3.14707	1	0.426	0.00682607	2	SORCS2
2.06341e-07	2.0228	0.75	0.139	0.00692027	2	AC112176.1
2.09187e-07	2.93771	1	0.475	0.00701571	2	NOS1
2.10415e-07	2.10266	1	0.327	0.0070569	2	SGIP1
2.13161e-07	2.73729	0.917	0.317	0.00714898	2	VXN
2.13829e-07	4.02671	0.917	0.277	0.00717141	2	RSPH3
2.1449e-07	3.24733	0.917	0.356	0.00719355	2	LINC01358
2.16989e-07	2.40945	0.75	0.129	0.00727739	2	GP5
2.16989e-07	1.54283	0.75	0.129	0.00727739	2	BAAT
2.18607e-07	3.62473	0.75	0.158	0.00733164	2	SLITRK3
2.18607e-07	3.21072	0.75	0.158	0.00733164	2	LCN8
2.21549e-07	2.24183	0.75	0.139	0.00743031	2	AC134682.1
2.25772e-07	3.48334	0.833	0.218	0.00757196	2	OR4K2
2.25772e-07	2.90488	0.833	0.218	0.00757196	2	NIM1K
2.25772e-07	1.55669	0.917	0.208	0.00757196	2	LINC01924
2.26397e-07	3.88616	0.667	0.119	0.00759292	2	B4GALNT4
2.26878e-07	3.27512	0.75	0.168	0.00760904	2	LINC01566
2.27893e-07	3.28611	0.833	0.208	0.00764307	2	ESRP2
2.27893e-07	3.13422	0.833	0.208	0.00764307	2	TMTC2
2.29029e-07	3.32538	0.917	0.337	0.00768118	2	SLC37A1
2.34159e-07	3.14974	0.75	0.158	0.00785324	2	OLFM3
2.34159e-07	2.33976	0.75	0.158	0.00785324	2	HSD17B13
2.37837e-07	1.96774	0.75	0.139	0.00797659	2	INPP5J
2.37997e-07	2.52172	0.75	0.149	0.00798195	2	OR2L13
2.37997e-07	2.27587	0.75	0.149	0.00798195	2	SCARF1
2.3899e-07	3.10926	0.917	0.317	0.00801524	2	CDC42BPG
2.39134e-07	0.699333	1	0.426	0.00802007	2	COL14A1
2.39807e-07	2.90318	0.917	0.356	0.00804266	2	SULF1
2.40395e-07	2.58335	0.833	0.218	0.00806235	2	SH2D3C
2.40395e-07	2.22119	0.833	0.218	0.00806235	2	RHCE
2.40546e-07	1.96764	0.917	0.277	0.00806744	2	TTLL7
2.42752e-07	3.98775	0.75	0.168	0.00814143	2	MPZL2
2.42752e-07	3.47649	0.75	0.168	0.00814143	2	BTBD16
2.42816e-07	2.60727	0.833	0.208	0.00814358	2	MORC1
2.43155e-07	3.15005	0.917	0.297	0.00815492	2	CLNK
2.47909e-07	2.20707	1	0.406	0.00831437	2	SLC27A1
2.48348e-07	3.5825	0.917	0.327	0.00832908	2	EML2
2.50778e-07	2.88975	0.75	0.158	0.0084106	2	SLC13A1
2.50928e-07	3.39101	0.917	0.267	0.00841561	2	SLC44A4
2.50928e-07	2.41	0.917	0.267	0.00841561	2	GPM6A
2.51183e-07	2.71842	0.667	0.099	0.00842417	2	AC079061.1
2.52286e-07	2.76378	1	0.426	0.00846115	2	MIR29B2CHG
2.55154e-07	2.75667	0.75	0.149	0.00855737	2	OR5AN1
2.5528e-07	2.99593	0.75	0.139	0.00856156	2	CATIP
2.56152e-07	3.2411	0.917	0.307	0.00859081	2	CDH24
2.56152e-07	2.93471	0.917	0.307	0.00859081	2	SLC2A9
2.56338e-07	3.81346	0.917	0.337	0.00859706	2	SGSM1
2.56338e-07	3.75605	0.917	0.337	0.00859706	2	CORIN
2.57638e-07	2.56498	1	0.396	0.00864065	2	ITGA3
2.58682e-07	2.76145	0.833	0.208	0.00867568	2	LINC01168
2.62803e-07	3.37523	0.917	0.327	0.00881389	2	CCDC33
2.629e-07	3.49365	0.917	0.347	0.00881715	2	LINC01206
2.62961e-07	4.62181	0.667	0.119	0.00881919	2	LINC01348
2.65543e-07	3.21996	1	0.693	0.00890578	2	MUC16
2.662e-07	1.93063	0.917	0.267	0.00892782	2	RNASEH2B-AS1
2.66633e-07	2.77951	0.833	0.228	0.00894234	2	SLC9C2
2.66977e-07	2.25266	0.917	0.248	0.00895386	2	MYOZ3
2.67583e-07	2.80236	1	0.525	0.0089742	2	AC118758.3
2.7567e-07	2.53981	0.833	0.198	0.00924543	2	IL15
2.7577e-07	3.14689	0.917	0.257	0.00924878	2	PEX5L
2.8332e-07	2.82145	0.667	0.119	0.00950199	2	OR4D9
2.8332e-07	2.70587	0.667	0.119	0.00950199	2	NOXRED1
2.83481e-07	3.18477	0.833	0.257	0.00950738	2	GUCY2C
2.86779e-07	2.71236	0.917	0.337	0.009618	2	SEMA4A
2.90661e-07	2.14872	1	0.495	0.0097482	2	FAM83F
2.90734e-07	2.15367	0.833	0.188	0.00975063	2	AC008105.3
2.91944e-07	2.67365	0.667	0.109	0.00979121	2	CD160
2.93124e-07	3.0445	0.75	0.149	0.0098308	2	RNF183
2.93524e-07	1.68577	0.667	0.099	0.00984419	2	LINC01756
2.93524e-07	1.55386	0.667	0.099	0.00984419	2	PRKCA-AS1
2.93524e-07	1.06837	0.667	0.099	0.00984419	2	LINC01808
2.93818e-07	1.89613	0.833	0.198	0.00985407	2	SARM1
2.93837e-07	2.90967	1	0.455	0.0098547	2	NPHP4
2.9708e-07	2.9392	0.75	0.168	0.00996346	2	LRRC29
2.97235e-07	0.880522	1	0.366	0.00996867	2	GVQW3
3.00018e-07	2.2137	0.917	0.317	0.010062	2	NGEF
3.02155e-07	3.24808	1	0.475	0.0101337	2	ADAMTSL1
3.02254e-07	3.36637	0.75	0.178	0.010137	2	CYP4F11
3.03984e-07	2.17905	0.917	0.277	0.010195	2	LY86-AS1
3.08575e-07	2.62864	0.833	0.218	0.010349	2	LRRC9
3.11214e-07	2.31567	0.917	0.327	0.0104375	2	AGBL3
3.11348e-07	3.91693	0.667	0.129	0.010442	2	LINC00304
3.14101e-07	2.09547	0.75	0.149	0.0105343	2	FBXO47
3.14958e-07	1.87797	0.667	0.109	0.0105631	2	AL008638.6
3.15342e-07	2.09468	0.75	0.139	0.0105759	2	IDO2
3.20768e-07	2.40304	0.833	0.228	0.0107579	2	CHRM5
3.21888e-07	2.89636	0.917	0.307	0.0107955	2	GABRB2
3.21888e-07	2.53838	0.917	0.307	0.0107955	2	FRMD1
3.21888e-07	2.53113	0.917	0.307	0.0107955	2	IL12A-AS1
3.23617e-07	1.3816	0.833	0.178	0.0108535	2	PHLDB3
3.26377e-07	2.50337	1	0.455	0.010946	2	SLIT2
3.28702e-07	3.03706	0.667	0.119	0.011024	2	ZSCAN1
3.29932e-07	2.68377	0.833	0.238	0.0110653	2	GABRP
3.31244e-07	1.87008	1	0.505	0.0111093	2	MYO7B
3.32758e-07	2.87346	0.833	0.208	0.01116	2	RFX1
3.34825e-07	3.42458	0.667	0.129	0.0112293	2	B3GNT10
3.36523e-07	2.65313	0.75	0.149	0.0112863	2	SPRED3
3.3838e-07	3.05792	0.917	0.366	0.0113486	2	PTPRB
3.39719e-07	3.0905	0.667	0.109	0.0113935	2	FCAMR
3.39719e-07	2.13068	0.667	0.109	0.0113935	2	LINC01750
3.41486e-07	2.3084	0.917	0.277	0.0114528	2	SLC11A1
3.41486e-07	2.01407	0.917	0.277	0.0114528	2	LRRN2
3.42717e-07	1.60571	0.667	0.099	0.011494	2	LINC00934
3.43644e-07	2.39575	0.917	0.287	0.0115251	2	RORB
3.43644e-07	2.06274	0.917	0.287	0.0115251	2	PLG
3.44875e-07	2.16269	0.75	0.178	0.0115664	2	MINDY4
3.48756e-07	2.50001	1	0.505	0.0116966	2	MGAM
3.49342e-07	2.79056	1	0.386	0.0117162	2	CAMK4
3.52487e-07	2.64423	0.75	0.158	0.0118217	2	GOLGA8S
3.53202e-07	3.96511	0.917	0.356	0.0118457	2	OGDHL
3.57051e-07	2.09447	0.917	0.267	0.0119748	2	C14orf93
3.60167e-07	2.35697	1	0.376	0.0120793	2	SLC7A1
3.6422e-07	2.81365	1	0.525	0.0122152	2	HMCN2
3.65989e-07	2.58315	1	0.426	0.0122745	2	PIEZO1
3.66354e-07	2.85484	0.667	0.109	0.0122868	2	LINC00967
3.6716e-07	3.17654	1	0.505	0.0123138	2	OTOG
3.68646e-07	2.37247	1	0.386	0.0123636	2	DCHS1
3.68646e-07	1.07238	1	0.386	0.0123636	2	FAT4
3.71604e-07	3.18271	0.833	0.218	0.0124629	2	PPP2R5B
3.73132e-07	3.16134	0.917	0.356	0.0125141	2	DBF4B
3.75967e-07	2.84974	0.917	0.317	0.0126092	2	LINC01435
3.77564e-07	1.95166	1	0.465	0.0126627	2	UVSSA
3.79637e-07	2.72461	1	0.554	0.0127323	2	MUC19
3.81063e-07	3.25696	0.667	0.119	0.0127801	2	SLC5A2
3.81063e-07	2.74142	0.667	0.119	0.0127801	2	TCN1
3.81923e-07	1.41917	0.833	0.257	0.0128089	2	LIPC
3.86093e-07	1.85247	0.75	0.149	0.0129488	2	RGS20
3.8701e-07	3.47401	0.667	0.129	0.0129795	2	LINC01016
3.87603e-07	1.77883	1	0.337	0.0129994	2	FAM30A
3.88977e-07	2.54319	1	0.386	0.0130455	2	MASP1
3.93124e-07	3.74064	0.75	0.188	0.0131846	2	OR5A2
3.93124e-07	2.99677	0.833	0.178	0.0131846	2	SHISA7
3.94999e-07	0.870813	0.667	0.109	0.0132475	2	ACOXL-AS1
3.9525e-07	3.08113	0.833	0.218	0.0132559	2	TDO2
3.95656e-07	3.51931	0.833	0.238	0.0132695	2	Z98949.1
4.00638e-07	2.30886	0.833	0.188	0.0134366	2	PKDREJ
4.03285e-07	1.60572	0.833	0.198	0.0135254	2	GCOM1
4.03459e-07	2.57103	0.75	0.158	0.0135312	2	DSG4
4.05271e-07	2.61553	1	0.446	0.013592	2	MEG3
4.07361e-07	2.47598	0.917	0.297	0.0136621	2	BCAS1
4.10175e-07	2.31922	0.667	0.119	0.0137565	2	SNAI2
4.10175e-07	2.24382	0.667	0.119	0.0137565	2	AL353803.2
4.10175e-07	1.87664	0.667	0.119	0.0137565	2	BCL2L15
4.1345e-07	2.04193	0.75	0.149	0.0138663	2	CHRNA9
4.15963e-07	3.28251	0.667	0.129	0.0139506	2	OTP
4.18116e-07	3.13518	0.833	0.287	0.0140228	2	CNTNAP3B
4.19342e-07	3.5023	0.75	0.188	0.0140639	2	TRARG1
4.19342e-07	3.30861	0.75	0.188	0.0140639	2	SRL
4.20053e-07	2.26718	1	0.554	0.0140877	2	NRXN1
4.20594e-07	2.35307	0.917	0.317	0.0141059	2	IGSF22
4.25799e-07	2.43877	0.667	0.109	0.0142804	2	REG1B
4.25799e-07	0.306656	0.667	0.109	0.0142804	2	TEPP
4.27115e-07	3.10218	0.833	0.208	0.0143246	2	SLC5A9
4.30335e-07	3.11354	0.917	0.277	0.0144326	2	TTYH2
4.30335e-07	2.219	0.917	0.277	0.0144326	2	LHX9
4.41429e-07	2.44725	0.667	0.119	0.0148046	2	LINC02232
4.42003e-07	2.87195	0.917	0.257	0.0148239	2	DIRC3
4.43075e-07	3.59952	0.75	0.168	0.0148599	2	SERPINE3
4.43075e-07	2.37866	0.75	0.168	0.0148599	2	AL589743.5
4.4631e-07	3.97911	0.833	0.238	0.0149683	2	PLA2G4E
4.4631e-07	2.76377	0.833	0.238	0.0149683	2	DRP2
4.46629e-07	3.71116	0.917	0.376	0.014979	2	SCUBE2
4.46629e-07	2.84073	0.917	0.376	0.014979	2	RFX4
4.46972e-07	2.80715	0.833	0.218	0.0149905	2	CYP4F22
4.47243e-07	3.64515	0.75	0.188	0.0149996	2	REN
4.4732e-07	2.7567	0.917	0.337	0.0150022	2	CSF3R
4.48228e-07	2.76428	1	0.594	0.0150327	2	SSPO
4.50629e-07	2.69207	0.917	0.267	0.0151132	2	WDR93
4.50629e-07	2.26356	0.917	0.267	0.0151132	2	FTCD
4.51719e-07	2.10128	1	0.426	0.0151497	2	ADGRD1
4.56043e-07	1.62549	0.917	0.248	0.0152948	2	PRKG2
4.56285e-07	2.47524	0.917	0.297	0.0153029	2	SLITRK5
4.56285e-07	2.40104	0.917	0.297	0.0153029	2	TLR4
4.57301e-07	3.40415	0.833	0.198	0.015337	2	GABRA4
4.58825e-07	2.4981	1	0.366	0.0153881	2	LSAMP
4.5891e-07	3.12241	0.667	0.109	0.0153909	2	AC104024.1
4.5891e-07	3.09219	0.667	0.109	0.0153909	2	LINC01187
4.5891e-07	2.27169	0.667	0.109	0.0153909	2	AF067845.2
4.60821e-07	3.06538	1	0.515	0.015455	2	CDH23
4.61508e-07	2.95172	0.75	0.158	0.015478	2	LINC02471
4.69022e-07	2.73077	0.917	0.366	0.0157301	2	DLEC1
4.71303e-07	1.72905	1	0.376	0.0158066	2	MYOM1
4.72653e-07	2.51731	0.917	0.337	0.0158518	2	TBXAS1
4.73884e-07	1.84442	0.75	0.149	0.0158931	2	IGHG2
4.73884e-07	0.329446	0.75	0.149	0.0158931	2	TBXT
4.74973e-07	3.156	0.667	0.119	0.0159296	2	ARMC12
4.75224e-07	2.46806	0.833	0.218	0.015938	2	GAD2
4.75224e-07	1.90073	0.833	0.218	0.015938	2	LINC02035
4.76931e-07	3.58421	0.75	0.188	0.0159953	2	PARP15
4.78022e-07	3.01318	0.917	0.307	0.0160319	2	CCDC168
4.8274e-07	2.60931	0.917	0.347	0.0161901	2	ITGAM
4.84324e-07	3.04951	1	0.802	0.0162433	2	TTN
4.86168e-07	3.26039	0.917	0.327	0.0163051	2	F5
4.86384e-07	2.42071	1	0.495	0.0163123	2	MEGF8
4.8903e-07	2.27091	1	0.465	0.0164011	2	PCNX2
4.91502e-07	2.94011	0.833	0.228	0.016484	2	CASC11
4.94649e-07	3.28715	0.917	0.396	0.0165895	2	L3MBTL1
4.99021e-07	2.4841	1	0.446	0.0167362	2	MAPT
5.03191e-07	2.80131	0.833	0.238	0.016876	2	GRIA2
5.07211e-07	1.24383	0.75	0.149	0.0170109	2	AC068633.1
5.10386e-07	3.64907	0.667	0.139	0.0171173	2	CHRM2
5.10464e-07	3.31601	0.75	0.178	0.01712	2	FP236383.1
5.10969e-07	3.88498	0.667	0.119	0.0171369	2	AC037459.2
5.10969e-07	3.68805	0.667	0.119	0.0171369	2	MGAT4D
5.10969e-07	3.4664	0.667	0.119	0.0171369	2	CD1E
5.10969e-07	2.80041	0.667	0.119	0.0171369	2	IRX4
5.10969e-07	2.65382	0.667	0.119	0.0171369	2	PRSS37
5.10969e-07	2.31051	0.667	0.119	0.0171369	2	SAGE1
5.1121e-07	2.59894	0.917	0.277	0.017145	2	CPT1C
5.1121e-07	0.841578	0.917	0.277	0.017145	2	TSHZ3
5.1297e-07	2.39795	0.917	0.248	0.017204	2	KCTD13
5.15916e-07	2.56091	0.667	0.129	0.0173028	2	BPIFA3
5.22125e-07	3.50603	0.833	0.228	0.017511	2	C16orf96
5.26488e-07	1.4252	0.917	0.257	0.0176573	2	BEND4
5.3274e-07	2.26605	0.667	0.109	0.017867	2	AHSG
5.3274e-07	2.11878	0.667	0.109	0.017867	2	AL031674.1
5.3274e-07	1.8738	0.667	0.109	0.017867	2	ACBD4
5.3274e-07	1.61452	0.667	0.109	0.017867	2	SNORC
5.3274e-07	1.20593	0.667	0.109	0.017867	2	CRISP3
5.35913e-07	2.41706	0.917	0.267	0.0179734	2	SLC5A5
5.36982e-07	3.22025	0.833	0.218	0.0180093	2	VGLL3
5.42794e-07	1.77504	0.75	0.149	0.0182042	2	SEMA6A-AS1
5.42794e-07	0.601315	0.75	0.149	0.0182042	2	UPK1B
5.42932e-07	2.62731	0.917	0.327	0.0182088	2	GALNTL6
5.44481e-07	3.25671	0.917	0.406	0.0182608	2	COL13A1
5.48666e-07	2.11317	1	0.455	0.0184012	2	CNKSR3
5.4959e-07	2.8728	0.667	0.119	0.0184321	2	AC069228.1
5.54109e-07	2.86144	0.667	0.129	0.0185837	2	FOLH1
5.54109e-07	2.47184	0.667	0.129	0.0185837	2	GPX6
5.54109e-07	2.32218	0.667	0.129	0.0185837	2	AC001226.2
5.54585e-07	2.55098	0.833	0.228	0.0185997	2	PLPPR2
5.54585e-07	2.07269	0.833	0.228	0.0185997	2	PHF24
5.63936e-07	3.20629	0.75	0.158	0.0189133	2	SYT6
5.65359e-07	1.89949	0.917	0.307	0.018961	2	CAPS2
5.73826e-07	2.62226	0.667	0.109	0.019245	2	GPR182
5.76595e-07	2.96846	0.75	0.168	0.0193378	2	IL1RN
5.76595e-07	2.53236	0.75	0.168	0.0193378	2	AC004448.2
5.76693e-07	3.37188	0.917	0.356	0.0193411	2	SLC12A4
5.77842e-07	3.10683	0.75	0.188	0.0193797	2	GAB4
5.79946e-07	3.42928	0.917	0.396	0.0194502	2	SLC6A1
5.8175e-07	2.73987	0.833	0.208	0.0195107	2	TMEM132E
5.85678e-07	2.15367	0.917	0.446	0.0196425	2	EPM2A
5.86365e-07	2.19508	1	0.426	0.0196655	2	ERBB3
5.87025e-07	1.71842	0.833	0.198	0.0196877	2	BST1
5.87136e-07	3.72237	0.667	0.139	0.0196914	2	GLI1
5.91016e-07	3.25524	0.667	0.119	0.0198215	2	MEOX1
5.91016e-07	2.83899	0.667	0.119	0.0198215	2	NEU4
5.91016e-07	2.17529	0.667	0.119	0.0198215	2	ZNF467
5.95021e-07	2.70537	0.667	0.129	0.0199558	2	AC107204.1
5.99845e-07	3.1668	1	0.366	0.0201176	2	MYBPC1
6.00447e-07	2.63403	1	0.465	0.0201378	2	MIPOL1
6.09224e-07	3.98103	0.833	0.248	0.0204322	2	EDA
6.11393e-07	3.30793	0.833	0.257	0.0205049	2	CILP
6.15167e-07	2.129	1	0.376	0.0206315	2	PPP6R2
6.15604e-07	2.08664	0.75	0.168	0.0206461	2	FBXW10
6.15838e-07	3.16896	0.75	0.188	0.020654	2	ZC3H12B
6.18582e-07	2.31003	0.833	0.208	0.020746	2	ZNF716
6.20658e-07	2.76724	0.917	0.317	0.0208156	2	AL022323.4
6.27e-07	2.99817	1	0.495	0.0210283	2	SPEG
6.35563e-07	3.40287	1	0.525	0.0213155	2	VWF
6.38837e-07	3.80836	0.667	0.129	0.0214253	2	HPCAL4
6.38837e-07	3.28165	0.667	0.129	0.0214253	2	HTR3E
6.42976e-07	1.22844	0.917	0.287	0.0215641	2	KCND2
6.43773e-07	3.07414	0.75	0.198	0.0215909	2	C1orf167
6.44048e-07	1.37802	0.75	0.158	0.0216001	2	CEACAM5
6.44048e-07	0.541853	0.75	0.158	0.0216001	2	TBC1D21
6.44346e-07	2.56504	0.833	0.218	0.0216101	2	NHLH2
6.44346e-07	2.18251	0.833	0.218	0.0216101	2	SH2D3A
6.44346e-07	1.86721	0.833	0.218	0.0216101	2	CDKN2B-AS1
6.44786e-07	3.32905	0.833	0.267	0.0216248	2	AC008555.2
6.4525e-07	2.77552	1	0.535	0.0216404	2	SHROOM3
6.56237e-07	2.92165	0.75	0.188	0.0220089	2	OR4K13
6.56304e-07	3.4671	0.917	0.337	0.0220111	2	NOTCH4
6.56304e-07	2.86122	0.917	0.337	0.0220111	2	TNFRSF11A
6.5715e-07	2.24682	0.75	0.168	0.0220395	2	CYP3A4
6.57656e-07	2.81417	0.833	0.208	0.0220565	2	PRX
6.60991e-07	3.31249	0.75	0.178	0.0221683	2	DENND6B
6.64062e-07	3.50241	0.833	0.228	0.0222713	2	EVA1C
6.64062e-07	2.45388	0.833	0.228	0.0222713	2	WDR63
6.64541e-07	0.512531	0.833	0.198	0.0222874	2	OLAH
6.64576e-07	1.84929	0.75	0.149	0.0222886	2	EPHA1-AS1
6.64964e-07	2.91925	1	0.465	0.0223016	2	OTOGL
6.74122e-07	3.77562	0.833	0.277	0.0226087	2	ZNF541
6.748e-07	3.41554	1	0.485	0.0226314	2	UBE2O
6.76217e-07	2.46538	0.917	0.297	0.022679	2	ADGRB1
6.76217e-07	2.33411	0.917	0.297	0.022679	2	MME
6.77647e-07	2.87025	0.833	0.238	0.0227269	2	KIF26A
6.83084e-07	3.5505	0.667	0.119	0.0229093	2	LILRA4
6.83223e-07	2.24867	1	0.356	0.0229139	2	SYT7
6.84924e-07	1.86192	1	0.426	0.022971	2	MUC2
6.85754e-07	3.13105	0.667	0.129	0.0229988	2	GBP6
6.86868e-07	3.46846	0.833	0.257	0.0230362	2	IYD
6.86868e-07	3.2813	0.833	0.257	0.0230362	2	GDPD4
7.01392e-07	2.01757	0.75	0.168	0.0235233	2	ASB5
7.04839e-07	2.94794	0.75	0.178	0.0236389	2	LINC02141
7.04979e-07	2.76734	0.833	0.228	0.0236436	2	LINC00426
7.06014e-07	1.8237	1	0.297	0.0236783	2	CHPT1
7.14195e-07	2.51319	0.917	0.327	0.0239527	2	EVPL
7.14985e-07	1.82456	0.917	0.297	0.0239792	2	VWDE
7.25429e-07	2.3339	1	0.515	0.0243294	2	LRIG2
7.26499e-07	3.26306	0.833	0.248	0.0243653	2	MIR9-3HG
7.26499e-07	2.74363	0.833	0.248	0.0243653	2	MPPED1
7.27116e-07	2.39112	0.833	0.218	0.024386	2	LINC01694
7.28051e-07	2.79296	1	0.554	0.0244174	2	TENM4
7.31565e-07	2.52379	0.917	0.337	0.0245352	2	POFUT1
7.34155e-07	3.31984	0.667	0.119	0.0246221	2	ST7-AS2
7.34155e-07	3.22566	0.667	0.119	0.0246221	2	KRT34
7.35072e-07	2.81224	0.75	0.158	0.0246529	2	AC013470.2
7.35982e-07	2.38468	0.667	0.129	0.0246834	2	CTSE
7.41908e-07	1.95095	1	0.366	0.0248821	2	TRAF3
7.46493e-07	2.84211	1	0.485	0.0250359	2	SPTB
7.48498e-07	2.90177	0.75	0.168	0.0251031	2	CYP4F12
7.48498e-07	2.72924	0.75	0.168	0.0251031	2	KCNJ14
7.52695e-07	1.91902	0.833	0.188	0.0252439	2	CLDN18
7.54467e-07	2.80322	0.917	0.356	0.0253033	2	ENPEP
7.55888e-07	2.49051	0.917	0.297	0.025351	2	GPR78
7.59893e-07	3.51367	0.917	0.386	0.0254853	2	CACNA1S
7.59893e-07	3.19371	0.917	0.386	0.0254853	2	PTCH1
7.59893e-07	1.29107	1	0.376	0.0254853	2	LOXL2
7.59967e-07	2.3184	0.75	0.149	0.0254878	2	TECTB
7.6092e-07	2.78672	0.917	0.277	0.0255197	2	DCT
7.62648e-07	1.96034	0.833	0.238	0.0255777	2	RAB37
7.93598e-07	2.62568	1	0.406	0.0266157	2	ITPK1
7.9587e-07	3.1816	0.917	0.356	0.0266919	2	CD226
7.9587e-07	2.61307	0.917	0.356	0.0266919	2	DPYSL5
7.96899e-07	3.47557	1	0.624	0.0267264	2	TACC2
7.98643e-07	2.21661	0.75	0.168	0.0267849	2	KCNAB3
7.99042e-07	2.6554	0.917	0.297	0.0267983	2	MYH8
7.99042e-07	2.44967	0.917	0.297	0.0267983	2	KIAA1257
7.99707e-07	1.45515	0.917	0.267	0.0268206	2	ZNF230
8.04704e-07	2.49483	0.917	0.287	0.0269882	2	ADAMTS20
8.08913e-07	2.29098	0.833	0.238	0.0271293	2	RHBDL3
8.08913e-07	1.79327	0.833	0.238	0.0271293	2	TXK
8.11394e-07	2.97991	0.833	0.267	0.0272125	2	SEPT3
8.15106e-07	2.90983	0.917	0.337	0.027337	2	ABCA7
8.16461e-07	3.16567	0.833	0.248	0.0273825	2	MXRA5
8.17151e-07	2.77653	0.917	0.248	0.0274056	2	SCAMP5
8.30813e-07	3.48306	0.667	0.139	0.0278638	2	SLCO1B1
8.33049e-07	1.40592	0.917	0.307	0.0279388	2	GALNT5
8.38427e-07	3.06765	0.75	0.158	0.0281192	2	LINC02389
8.38427e-07	2.2336	0.75	0.158	0.0281192	2	AADACL2
8.40296e-07	3.20226	0.917	0.426	0.0281819	2	ANKFN1
8.40296e-07	2.00881	1	0.416	0.0281819	2	CACNA2D4
8.408e-07	2.45945	0.917	0.327	0.0281988	2	ZBTB8B
8.42383e-07	1.90274	1	0.475	0.0282518	2	DOCK3
8.42827e-07	2.96637	0.833	0.228	0.0282667	2	SKAP1
8.42827e-07	2.63926	0.833	0.228	0.0282667	2	MYEOV
8.44564e-07	2.60829	0.917	0.297	0.028325	2	ZFP30
8.44894e-07	3.08412	0.75	0.188	0.0283361	2	AC012358.3
8.47556e-07	3.46226	0.667	0.119	0.0284253	2	NHLRC1
8.47556e-07	2.46998	0.667	0.119	0.0284253	2	LINC01547
8.47556e-07	2.31323	0.667	0.119	0.0284253	2	TMEM220-AS1
8.47556e-07	1.81366	0.667	0.119	0.0284253	2	COLEC10
8.47556e-07	1.7508	0.667	0.119	0.0284253	2	GOLGA8K
8.51602e-07	2.13744	0.917	0.277	0.028561	2	ZFHX2
8.52016e-07	3.03336	0.75	0.168	0.0285749	2	TBX6
8.52016e-07	2.88534	0.75	0.168	0.0285749	2	KL
8.52016e-07	2.60423	0.75	0.168	0.0285749	2	C2
8.57874e-07	2.62243	0.833	0.238	0.0287714	2	SEZ6L
8.65375e-07	2.46787	0.833	0.248	0.0290229	2	FAM13C
8.67786e-07	2.26083	1	0.505	0.0291038	2	ZNF704
8.75096e-07	2.27951	0.917	0.347	0.029349	2	CDK18
8.75849e-07	3.58633	0.833	0.287	0.0293742	2	B4GALNT2
8.77438e-07	2.68678	1	0.446	0.0294275	2	EYS
8.85412e-07	2.52205	1	0.515	0.029695	2	SHANK2
8.87613e-07	0.646845	1	0.317	0.0297688	2	COQ8B
8.90076e-07	3.17337	0.667	0.139	0.0298514	2	SIGLEC15
8.91052e-07	3.36333	0.917	0.366	0.0298841	2	FRMPD2
8.9522e-07	1.78669	0.75	0.158	0.0300239	2	HHIPL2
9.0113e-07	2.24536	1	0.465	0.0302221	2	NKD1
9.07797e-07	2.06229	0.917	0.337	0.0304457	2	DNAJC6
9.09548e-07	3.0654	0.833	0.267	0.0305044	2	BCO2
9.09683e-07	2.98145	0.833	0.238	0.0305089	2	MUCL3
9.09683e-07	2.79019	0.833	0.238	0.0305089	2	AP003025.2
9.09947e-07	3.825	0.75	0.178	0.0305178	2	NPTXR
9.09947e-07	3.77234	0.75	0.178	0.0305178	2	CNGA3
9.10406e-07	2.62242	0.667	0.119	0.0305332	2	LRRC25
9.12518e-07	2.19684	1	0.485	0.030604	2	ARHGEF1
9.1756e-07	3.09354	0.833	0.307	0.0307731	2	KCTD16
9.24443e-07	2.2296	0.833	0.218	0.031004	2	LINC01913
9.31221e-07	1.71344	1	0.416	0.0312313	2	PTK2B
9.32076e-07	3.00061	1	0.426	0.03126	2	NPAS2
9.35427e-07	3.743	0.75	0.198	0.0313724	2	CHGA
9.37145e-07	3.29329	0.917	0.386	0.03143	2	CHD5
9.37145e-07	2.89741	0.917	0.386	0.03143	2	BMP1
9.43214e-07	1.80216	0.917	0.297	0.0316335	2	NEK5
9.57839e-07	2.56431	0.75	0.188	0.032124	2	FAM241A
9.57839e-07	2.19519	0.75	0.188	0.032124	2	EEF1A2
9.64497e-07	0.666665	0.833	0.238	0.0323473	2	TRAF3IP3
9.71046e-07	2.73782	1	0.446	0.0325669	2	FSIP2
9.71804e-07	2.79925	0.833	0.248	0.0325924	2	OLFML2B
9.71804e-07	2.78518	0.833	0.248	0.0325924	2	TRAF1
9.74702e-07	3.39478	0.667	0.129	0.0326896	2	AL365181.3
9.74702e-07	2.72368	0.667	0.129	0.0326896	2	LRRC71
9.77731e-07	2.83555	0.667	0.119	0.0327911	2	SERPINA3
9.77731e-07	2.80629	0.667	0.119	0.0327911	2	EDN2
9.81306e-07	3.05267	0.833	0.218	0.0329111	2	EPHA1
1.00261e-06	1.2669	0.917	0.267	0.0336256	2	GALNT3
1.00487e-06	2.51427	1	0.386	0.0337012	2	TLDC1
1.00645e-06	2.66571	0.833	0.228	0.0337543	2	AC007405.1
1.00725e-06	2.1869	1	0.505	0.0337811	2	COL16A1
1.01058e-06	1.30689	1	0.455	0.0338928	2	ARHGEF10L
1.0155e-06	3.10078	0.917	0.317	0.0340578	2	CR1
1.0155e-06	2.6168	0.917	0.317	0.0340578	2	NMNAT2
1.02105e-06	2.90919	0.667	0.139	0.0342439	2	SLC22A3
1.02733e-06	2.33441	1	0.554	0.0344546	2	DNAH7
1.02832e-06	1.94288	0.833	0.257	0.0344877	2	LRGUK
1.02832e-06	1.55722	0.917	0.248	0.0344877	2	SLC6A7
1.02964e-06	2.68509	0.833	0.248	0.034532	2	LINC01748
1.02964e-06	2.44354	0.833	0.248	0.034532	2	GRAMD4
1.03123e-06	3.15519	0.917	0.396	0.0345854	2	MUC17
1.03297e-06	3.31149	0.75	0.178	0.0346438	2	AC099062.1
1.03297e-06	2.72023	0.75	0.178	0.0346438	2	ZNF792
1.04432e-06	3.75242	0.917	0.376	0.0350245	2	ITGA11
1.04984e-06	2.17717	0.667	0.119	0.0352094	2	AL136529.1
1.04984e-06	2.17464	0.667	0.119	0.0352094	2	AC016573.1
1.04984e-06	1.39776	0.667	0.119	0.0352094	2	LINC01833
1.05861e-06	2.25289	1	0.535	0.0355035	2	ANK1
1.06611e-06	2.33309	0.917	0.337	0.0357552	2	COL23A1
1.0887e-06	1.50068	0.75	0.158	0.0365128	2	MCM3AP-AS1
1.08881e-06	2.87	0.833	0.257	0.0365163	2	TMEM182
1.08881e-06	1.66812	0.833	0.257	0.0365163	2	STX18-AS1
1.09421e-06	3.24613	0.917	0.356	0.0366976	2	B3GALT5
1.09556e-06	2.58877	1	0.376	0.0367427	2	FRMD6
1.09692e-06	1.77086	1	0.525	0.0367884	2	MCF2L2
1.10122e-06	2.63949	0.917	0.327	0.0369329	2	ONECUT2
1.10194e-06	2.10039	0.75	0.168	0.0369568	2	LINC02237
1.10194e-06	1.67872	0.75	0.168	0.0369568	2	BMP4
1.1053e-06	1.73369	0.833	0.218	0.0370696	2	GCNT1
1.11381e-06	2.17558	1	0.485	0.037355	2	CAMK2B
1.11817e-06	3.5826	1	0.624	0.0375011	2	CLPB
1.11817e-06	2.52422	1	0.624	0.0375011	2	DNAH14
1.12047e-06	3.06491	0.667	0.129	0.0375782	2	VTN
1.12047e-06	2.83613	0.667	0.129	0.0375782	2	SERPIND1
1.12704e-06	2.02829	0.667	0.119	0.0377988	2	FETUB
1.12704e-06	2.00915	0.667	0.119	0.0377988	2	LCN15
1.13208e-06	3.45851	0.833	0.228	0.0379678	2	LOXL4
1.13208e-06	2.86782	0.833	0.228	0.0379678	2	BFSP1
1.14126e-06	2.96076	0.833	0.267	0.0382756	2	ZDHHC1
1.14186e-06	2.48598	1	0.574	0.0382956	2	KCNMA1
1.14239e-06	1.90455	1	0.426	0.0383135	2	ALDH1L1
1.1435e-06	2.58283	0.917	0.396	0.0383508	2	RP1
1.15271e-06	2.95752	0.833	0.257	0.0386596	2	PSG4
1.15387e-06	3.38407	0.917	0.386	0.0386984	2	RGS6
1.15492e-06	3.03529	0.75	0.188	0.0387337	2	TRIB3
1.15916e-06	2.93941	0.917	0.376	0.038876	2	MYO1H
1.17047e-06	2.64022	0.667	0.139	0.0392552	2	U73166.1
1.17192e-06	2.19573	0.75	0.178	0.039304	2	ILDR1
1.17282e-06	1.94574	0.833	0.218	0.0393342	2	ZNF441
1.17282e-06	1.53865	0.833	0.218	0.0393342	2	AC097478.1
1.17483e-06	2.8361	0.917	0.297	0.0394016	2	POU2F3
1.18607e-06	2.36413	0.917	0.337	0.0397784	2	FBXL18
1.18642e-06	1.94643	0.917	0.287	0.03979	2	ADAMTS3
1.18793e-06	2.42492	1	0.446	0.0398406	2	ATP13A1
1.19425e-06	2.63299	0.917	0.317	0.0400526	2	AL355306.2
1.19662e-06	2.79129	0.75	0.198	0.0401324	2	Z82217.1
1.1997e-06	2.85338	0.667	0.149	0.0402354	2	AC108866.1
1.20043e-06	1.82808	0.833	0.228	0.0402601	2	FBXO4
1.20043e-06	1.79981	0.833	0.228	0.0402601	2	AC097376.2
1.201e-06	2.2084	0.667	0.129	0.0402793	2	SYT4
1.20396e-06	2.82334	0.917	0.396	0.0403785	2	AKAP6
1.20399e-06	1.62173	0.917	0.347	0.0403793	2	TRPS1
1.20441e-06	1.34853	0.833	0.208	0.0403935	2	AC097662.1
1.20752e-06	3.10529	0.833	0.267	0.0404977	2	ZMIZ1-AS1
1.21728e-06	3.04178	0.833	0.238	0.0408253	2	CSF1
1.21811e-06	2.27995	0.917	0.455	0.0408529	2	INO80
1.22105e-06	3.39603	0.917	0.376	0.0409514	2	COL20A1
1.2258e-06	2.86724	0.917	0.327	0.0411108	2	CHRNA4
1.22888e-06	3.04138	0.75	0.188	0.0412143	2	LINC02432
1.22888e-06	2.16373	0.75	0.188	0.0412143	2	SLC16A12
1.24798e-06	2.51363	0.75	0.178	0.0418547	2	AL031590.1
1.24798e-06	2.35274	0.75	0.178	0.0418547	2	ZNF396
1.24803e-06	0.60912	1	0.347	0.0418564	2	MDGA2
1.25082e-06	2.95083	0.917	0.337	0.04195	2	WSCD2
1.25202e-06	2.86073	0.75	0.168	0.0419902	2	CA8
1.25286e-06	2.95613	0.667	0.139	0.0420184	2	SAMD7
1.25878e-06	0.3427	1	0.436	0.0422169	2	FRRS1L
1.25989e-06	1.67125	1	0.406	0.0422542	2	CACNA2D3
1.26029e-06	2.34241	0.917	0.317	0.0422676	2	SHISA6
1.26029e-06	1.9223	0.917	0.317	0.0422676	2	SEPT4
1.26029e-06	1.60673	0.917	0.317	0.0422676	2	SLC14A2
1.27216e-06	2.48843	0.75	0.198	0.0426655	2	PNPLA1
1.27747e-06	3.48098	0.833	0.267	0.0428437	2	AC103740.1
1.27957e-06	2.34595	1	0.376	0.0429144	2	ALPK1
1.2824e-06	1.38913	0.667	0.109	0.0430092	2	OPN1SW
1.28674e-06	2.56394	0.917	0.366	0.0431546	2	KLF13
1.28872e-06	1.77136	0.917	0.307	0.043221	2	SLC15A2
1.28981e-06	2.16841	0.833	0.238	0.0432577	2	AP005230.1
1.29105e-06	3.90871	0.667	0.158	0.0432993	2	AC009158.1
1.29151e-06	3.12132	0.833	0.257	0.0433148	2	CNBD2
1.3074e-06	1.94179	0.75	0.188	0.0438474	2	ZNF619
1.31729e-06	3.74333	0.75	0.218	0.0441793	2	PLEKHS1
1.32017e-06	2.44401	1	0.584	0.0442758	2	CACNA1C
1.32563e-06	2.28019	1	0.406	0.044459	2	SNTG2
1.34081e-06	3.23241	0.667	0.139	0.0449682	2	AQP9
1.35226e-06	3.54633	0.75	0.198	0.0453522	2	RBM24
1.35713e-06	2.31861	0.833	0.208	0.0455154	2	AC091078.1
1.36387e-06	2.41791	0.917	0.327	0.0457415	2	POLG
1.36387e-06	1.82825	0.917	0.327	0.0457415	2	CARMIL3
1.36638e-06	2.54275	1	0.614	0.0458256	2	COL5A1
1.37845e-06	2.27264	0.75	0.149	0.0462305	2	CLCA1
1.3791e-06	2.51597	0.667	0.129	0.0462524	2	NEUROD2
1.3791e-06	2.24856	0.667	0.129	0.0462524	2	AC009365.1
1.38586e-06	1.56271	1	0.347	0.046479	2	HACD4
1.39072e-06	3.1718	0.75	0.188	0.046642	2	SLC26A7
1.39072e-06	2.9231	0.75	0.188	0.046642	2	KCNJ16
1.39169e-06	2.31385	1	0.436	0.0466746	2	EXTL3
1.39285e-06	3.1824	0.667	0.119	0.0467135	2	WDR88
1.39799e-06	2.50522	1	0.426	0.0468857	2	COL17A1
1.39877e-06	2.50188	0.833	0.297	0.046912	2	ARHGEF37
1.40246e-06	2.85561	0.833	0.277	0.0470357	2	FYB2
1.41008e-06	3.01714	0.75	0.158	0.0472914	2	SLC6A14
1.41021e-06	1.77443	0.917	0.347	0.0472955	2	ZNF862
1.41458e-06	2.25511	0.75	0.178	0.0474422	2	LINC00663
1.42155e-06	2.9209	1	0.505	0.0476761	2	TG
1.42166e-06	2.40534	0.75	0.168	0.0476796	2	SNAP25-AS1
1.42166e-06	2.07271	0.75	0.168	0.0476796	2	ZBTB32
1.42166e-06	1.24478	0.75	0.168	0.0476796	2	MS4A3
1.42599e-06	2.09071	1	0.485	0.0478248	2	CFAP46
1.42636e-06	3.75183	0.917	0.376	0.0478372	2	COL25A1
1.43721e-06	2.52103	0.75	0.198	0.0482011	2	ST8SIA4
1.4384e-06	2.13694	0.917	0.327	0.048241	2	TBC1D14
1.44455e-06	3.1838	0.833	0.287	0.0484474	2	HCN1
1.44455e-06	3.04219	0.833	0.287	0.0484474	2	CHAT
1.44754e-06	2.32903	0.833	0.238	0.0485474	2	DDC
1.44754e-06	2.30976	0.833	0.238	0.0485474	2	MYORG
1.45271e-06	2.91738	0.833	0.248	0.048721	2	FRMPD1
1.45707e-06	2.19726	1	0.475	0.0488672	2	MAN2B2
1.46311e-06	2.38202	1	0.436	0.0490699	2	EPB41L3
1.47153e-06	1.77278	0.75	0.149	0.0493521	2	MS4A2
1.47735e-06	3.65742	0.833	0.297	0.0495474	2	NLRC3
1.47742e-06	2.77261	0.667	0.129	0.0495498	2	ANXA10
1.47742e-06	1.85053	0.667	0.129	0.0495498	2	FPR1
1.47914e-06	2.14767	0.75	0.188	0.0496074	2	GHDC
1.48372e-06	3.69304	0.75	0.218	0.049761	2	LCTL
1.48478e-06	0.314628	0.833	0.218	0.0497967	2	GOLGA7B
2.55666e-19	2.95161	1	0.029	8.57452e-15	3	LINC02542
5.91318e-19	3.77384	1	0.039	1.98316e-14	3	Z83839.2
9.65734e-19	4.57189	0.8	0.01	3.23888e-14	3	AC010904.2
1.09394e-18	3.88928	0.9	0.019	3.66886e-14	3	AL137186.1
1.47681e-17	5.37266	1	0.049	4.95293e-13	3	AC092376.1
5.51957e-17	4.83613	0.9	0.039	1.85115e-12	3	AL513324.1
6.14395e-17	8.57178	1	0.068	2.06056e-12	3	AC079414.1
6.44349e-17	4.72627	0.9	0.039	2.16102e-12	3	AC009623.2
8.77253e-17	4.33636	0.9	0.039	2.94213e-12	3	LINC02299
1.23451e-16	3.75812	1	0.058	4.14031e-12	3	C1orf210
1.39801e-16	5.07153	1	0.068	4.68866e-12	3	AC092810.3
2.06164e-16	3.02398	0.8	0.019	6.91432e-12	3	AC123786.1
2.1964e-16	4.0306	0.9	0.039	7.3663e-12	3	SMILR
2.1964e-16	3.47109	0.9	0.039	7.3663e-12	3	AC066613.1
2.1964e-16	2.6064	0.9	0.039	7.3663e-12	3	AP003059.1
3.62329e-16	2.41974	0.7	0.01	1.21518e-11	3	AC108067.1
4.80008e-16	4.5404	0.9	0.049	1.60985e-11	3	C7orf25
6.41719e-16	3.85242	0.9	0.049	2.1522e-11	3	AC068254.1
7.03749e-16	4.54592	1	0.068	2.36023e-11	3	AC003666.1
7.33122e-16	1.92898	0.9	0.039	2.45874e-11	3	AC016730.1
9.2173e-16	2.2945	0.7	0.01	3.0913e-11	3	AC138819.1
1.04134e-15	6.34666	1	0.078	3.49245e-11	3	AC084809.2
1.31901e-15	5.45555	0.9	0.049	4.42368e-11	3	ZNF385D-AS1
1.3343e-15	1.52025	0.7	0.01	4.47499e-11	3	AL121757.2
1.46854e-15	2.57321	1	0.058	4.92518e-11	3	SPINK2
1.77558e-15	3.49252	1	0.068	5.95494e-11	3	C2orf15
2.02444e-15	3.75123	1	0.068	6.78958e-11	3	AL021937.3
2.02482e-15	4.42102	0.9	0.049	6.79083e-11	3	LINC02307
2.251e-15	4.01694	1	0.078	7.54939e-11	3	AL356277.3
2.62964e-15	3.16172	1	0.068	8.81929e-11	3	COX8C
2.98677e-15	2.15568	0.8	0.029	1.0017e-10	3	HIGD1C
3.57712e-15	6.06359	0.9	0.058	1.19969e-10	3	LINC02424
3.84292e-15	4.97815	1	0.087	1.28884e-10	3	SMKR1
4.78291e-15	2.37814	0.8	0.029	1.60409e-10	3	AC119427.1
4.9211e-15	6.61888	1	0.087	1.65044e-10	3	LINC02147
4.9211e-15	3.63503	1	0.087	1.65044e-10	3	FIGLA
5.38868e-15	4.54081	0.9	0.058	1.80725e-10	3	AC005050.1
7.07109e-15	3.59573	0.9	0.058	2.3715e-10	3	RBPMS-AS1
7.20429e-15	2.38978	0.9	0.049	2.41617e-10	3	LINC02224
7.63298e-15	2.51079	0.8	0.029	2.55995e-10	3	AL139424.1
8.91314e-15	2.33503	0.8	0.029	2.98929e-10	3	AC119403.1
9.03787e-15	5.15772	1	0.078	3.03112e-10	3	AC104241.2
9.09413e-15	5.31854	1	0.087	3.04999e-10	3	AC007846.1
1.23826e-14	4.75258	1	0.097	4.15289e-10	3	FAM72A
1.5706e-14	5.60277	1	0.097	5.26749e-10	3	LINC02446
1.67065e-14	4.73756	1	0.087	5.60303e-10	3	CCL20
1.99033e-14	5.11453	1	0.097	6.67517e-10	3	MRVI1-AS1
2.61074e-14	2.21266	0.8	0.029	8.75589e-10	3	AC022874.1
2.83447e-14	5.28013	1	0.097	9.50625e-10	3	LINC01830
3.05403e-14	5.64445	0.9	0.068	1.02426e-09	3	AC018731.1
3.47244e-14	4.09609	0.7	0.019	1.16459e-09	3	AC110015.1
3.5838e-14	5.55362	1	0.097	1.20193e-09	3	LINC01511
3.5838e-14	4.41652	1	0.097	1.20193e-09	3	LINC01644
3.5838e-14	3.96463	1	0.097	1.20193e-09	3	FEZF2
3.697e-14	3.50974	0.8	0.039	1.2399e-09	3	SSU72P3
4.27546e-14	4.11215	0.8	0.039	1.43391e-09	3	AC008415.1
4.83483e-14	1.82744	0.7	0.019	1.62151e-09	3	AC025165.5
4.83483e-14	1.51921	0.7	0.019	1.62151e-09	3	AC068756.1
5.10113e-14	4.75112	0.9	0.068	1.71082e-09	3	THRSP
5.53876e-14	2.72148	1	0.087	1.85759e-09	3	C3orf33
5.79519e-14	5.43107	0.9	0.068	1.94359e-09	3	AL162582.1
7.04383e-14	5.31008	1	0.107	2.36236e-09	3	C11orf40
7.47332e-14	4.33188	0.9	0.068	2.5064e-09	3	AL606516.1
7.47332e-14	3.23363	0.9	0.068	2.5064e-09	3	LINC01479
7.62063e-14	3.43077	0.8	0.039	2.55581e-09	3	AC084819.1
7.88941e-14	5.85581	1	0.107	2.64595e-09	3	AC008056.1
8.48318e-14	4.12332	0.9	0.068	2.84509e-09	3	IGHEP1
8.62862e-14	6.7725	0.9	0.078	2.89387e-09	3	AL513548.1
9.21011e-14	6.62737	1	0.117	3.08889e-09	3	LINC01030
1.00433e-13	2.49029	0.9	0.058	3.36834e-09	3	AC073218.2
1.01831e-13	1.54022	1	0.097	3.4152e-09	3	FP565260.6
1.10709e-13	4.02858	1	0.107	3.71296e-09	3	FAM228A
1.1492e-13	5.37787	1	0.117	3.85418e-09	3	HHEX
1.23874e-13	3.25372	0.9	0.068	4.15449e-09	3	AC068413.1
1.28328e-13	6.90079	1	0.117	4.30388e-09	3	LINC02548
1.38612e-13	4.23484	1	0.107	4.64877e-09	3	NEFM
1.55048e-13	4.00637	1	0.107	5.20002e-09	3	CHRNA5
1.57535e-13	4.48343	0.8	0.049	5.28342e-09	3	AC044810.3
1.59221e-13	3.45222	0.9	0.068	5.33996e-09	3	AC103858.2
1.78467e-13	5.53888	1	0.117	5.98544e-09	3	C9orf135
1.8044e-13	3.42014	0.9	0.068	6.0516e-09	3	AC020559.1
1.8044e-13	2.50208	0.9	0.068	6.0516e-09	3	SLCO1B3
1.93873e-13	5.14365	1	0.107	6.5021e-09	3	AC092422.1
1.93873e-13	3.5249	1	0.107	6.5021e-09	3	AC103409.1
1.96513e-13	6.86243	1	0.126	6.59066e-09	3	EBLN1
1.99123e-13	5.92019	1	0.117	6.67819e-09	3	TUBA4B
2.22123e-13	5.04827	1	0.117	7.44955e-09	3	RERGL
2.47727e-13	5.48348	1	0.117	8.30826e-09	3	KHDC3L
2.59153e-13	5.03809	0.9	0.078	8.69148e-09	3	TRPC7-AS2
2.6219e-13	4.15687	0.9	0.068	8.79333e-09	3	WFDC10A
2.71084e-13	6.7277	1	0.126	9.09161e-09	3	AC073133.2
2.71854e-13	5.8506	0.8	0.049	9.11743e-09	3	AC136188.1
2.71854e-13	3.42805	0.8	0.049	9.11743e-09	3	AL138749.1
3.29953e-13	2.93462	0.9	0.078	1.1066e-08	3	LINC02296
3.73269e-13	6.23909	1	0.126	1.25187e-08	3	AP003351.1
3.73269e-13	5.5358	1	0.126	1.25187e-08	3	LINC01467
3.80042e-13	2.88834	0.9	0.068	1.27458e-08	3	AL139161.2
3.90736e-13	7.08663	1	0.136	1.31045e-08	3	C4orf47
4.04698e-13	3.40569	0.7	0.029	1.35728e-08	3	AC006967.3
4.07906e-13	4.71034	0.8	0.049	1.36804e-08	3	AC084855.1
4.07906e-13	3.30495	0.8	0.049	1.36804e-08	3	AL023693.1
4.15099e-13	5.33909	1	0.126	1.39216e-08	3	BCL2L10
4.73097e-13	4.91949	0.9	0.078	1.58667e-08	3	AC022166.1
4.73097e-13	4.74503	0.9	0.078	1.58667e-08	3	AL157400.1
4.74608e-13	3.58616	1	0.117	1.59174e-08	3	C9orf40
5.13034e-13	4.72469	1	0.126	1.72062e-08	3	AC090204.1
5.33201e-13	4.33035	0.9	0.078	1.78825e-08	3	AC114912.1
5.34115e-13	6.16206	1	0.136	1.79131e-08	3	H1FOO
5.84891e-13	3.36696	1	0.107	1.96161e-08	3	TAF1A-AS1
5.88471e-13	6.39428	1	0.117	1.97361e-08	3	CASC18
6.10249e-13	3.20153	0.8	0.049	2.04665e-08	3	HTR2A-AS1
6.36532e-13	3.52699	0.7	0.029	2.1348e-08	3	AC107072.2
7.92605e-13	2.45583	0.9	0.068	2.65824e-08	3	CCDC160
8.59108e-13	2.00632	0.7	0.029	2.88128e-08	3	AC026719.1
8.68143e-13	4.46517	1	0.126	2.91158e-08	3	IGFBP1
9.00279e-13	4.13802	0.8	0.058	3.01936e-08	3	AC127526.1
9.63864e-13	5.59887	1	0.126	3.23261e-08	3	AP002991.1
1.06992e-12	4.05808	1	0.126	3.5883e-08	3	LINC02547
1.10003e-12	5.66753	1	0.136	3.68927e-08	3	AL355773.1
1.1576e-12	3.43768	0.7	0.029	3.88234e-08	3	AL589843.1
1.18643e-12	3.75404	0.8	0.049	3.97905e-08	3	LINC00376
1.18643e-12	3.16633	0.8	0.049	3.97905e-08	3	AC010420.1
1.22269e-12	4.10474	0.9	0.078	4.10067e-08	3	AL669970.1
1.34289e-12	1.24538	0.7	0.029	4.5038e-08	3	AC122108.2
1.35383e-12	2.26512	0.8	0.049	4.54047e-08	3	AC008555.5
1.48074e-12	6.5893	0.9	0.097	4.96611e-08	3	AC009623.1
1.48074e-12	4.64193	0.9	0.097	4.96611e-08	3	AC062032.1
1.54626e-12	2.80389	0.9	0.078	5.18584e-08	3	GPR27
1.62113e-12	5.49793	1	0.126	5.43693e-08	3	AL049629.1
1.73818e-12	3.45588	0.9	0.078	5.82951e-08	3	LINC02149
1.80498e-12	1.72909	0.7	0.029	6.05355e-08	3	AC092723.1
1.93667e-12	3.12863	0.8	0.058	6.49521e-08	3	HOXD1
1.95342e-12	3.48597	0.9	0.078	6.55138e-08	3	LINC01608
1.99306e-12	6.03992	1	0.126	6.68433e-08	3	UCMA
2.18518e-12	3.12842	0.9	0.087	7.32866e-08	3	LINC02330
2.18518e-12	2.8785	0.9	0.087	7.32866e-08	3	CCNO
2.31254e-12	5.96598	0.9	0.097	7.7558e-08	3	AC015987.1
2.58366e-12	5.18192	0.9	0.097	8.66508e-08	3	AC021088.1
2.80397e-12	1.7971	0.7	0.029	9.40395e-08	3	FTHL17
2.82878e-12	3.68408	0.8	0.058	9.48716e-08	3	AC116565.1
3.03668e-12	4.40063	1	0.136	1.01844e-07	3	CXorf67
3.12685e-12	4.78761	1	0.155	1.04868e-07	3	MIXL1
3.20761e-12	3.84202	0.8	0.058	1.07577e-07	3	OR1N1
3.20761e-12	2.75408	0.8	0.058	1.07577e-07	3	AC073133.1
3.28525e-12	4.7445	1	0.146	1.10181e-07	3	BMP15
3.37937e-12	2.20627	0.8	0.049	1.13337e-07	3	AL162414.1
3.37937e-12	1.61107	0.8	0.049	1.13337e-07	3	BX322562.1
3.4551e-12	3.89658	0.7	0.039	1.15877e-07	3	AL592431.2
3.51691e-12	5.64733	1	0.165	1.1795e-07	3	GPR37
3.51691e-12	5.42397	1	0.165	1.1795e-07	3	NXPH1
3.53837e-12	3.99603	1	0.117	1.1867e-07	3	THAP10
3.62623e-12	4.82672	1	0.146	1.21617e-07	3	CCNB3
3.63605e-12	2.13484	0.8	0.058	1.21946e-07	3	TLR8-AS1
3.71173e-12	3.53608	1	0.136	1.24484e-07	3	RBM11
3.87053e-12	6.03917	1	0.165	1.2981e-07	3	PDE8B
4.01598e-12	4.60709	0.9	0.097	1.34688e-07	3	LINC02234
4.04027e-12	2.56288	1	0.107	1.35502e-07	3	DLL3
4.61116e-12	4.33321	1	0.155	1.54649e-07	3	LINC02303
4.66797e-12	3.62026	0.8	0.058	1.56554e-07	3	AC090707.1
4.99982e-12	4.70007	0.9	0.097	1.67684e-07	3	LINC02254
4.99982e-12	4.3103	0.9	0.097	1.67684e-07	3	AL358335.2
5.57676e-12	4.23796	0.9	0.097	1.87033e-07	3	NAT2
5.59347e-12	4.50668	1	0.155	1.87594e-07	3	USP50
5.92454e-12	4.32243	1	0.146	1.98697e-07	3	OR8G5
5.98542e-12	3.84851	0.8	0.058	2.00739e-07	3	SAA1
6.01776e-12	3.05279	0.7	0.039	2.01824e-07	3	AC095050.1
6.14492e-12	4.64573	0.9	0.107	2.06088e-07	3	AC025277.1
6.15881e-12	4.1845	1	0.155	2.06554e-07	3	SOX30
6.6018e-12	5.52003	0.8	0.068	2.21411e-07	3	AC003092.1
6.93537e-12	2.2891	0.9	0.078	2.32599e-07	3	PTCHD1-AS
7.2004e-12	4.20705	1	0.146	2.41487e-07	3	LINC02328
7.92383e-12	3.84745	0.7	0.039	2.65749e-07	3	AC091493.1
7.93568e-12	4.21227	1	0.146	2.66147e-07	3	TLE7
8.21226e-12	5.941	1	0.155	2.75423e-07	3	C1orf146
8.74438e-12	4.19948	1	0.146	2.93269e-07	3	AURKC
9.08737e-12	3.34945	0.7	0.039	3.04772e-07	3	AC011990.1
9.08737e-12	2.83375	0.7	0.039	3.04772e-07	3	LINC02163
9.59354e-12	3.25768	0.9	0.097	3.21748e-07	3	LINC02262
9.63365e-12	3.42852	1	0.146	3.23094e-07	3	ELOVL2
9.93968e-12	3.55776	1	0.155	3.33357e-07	3	LINC02391
1.04178e-11	2.91278	0.7	0.039	3.49393e-07	3	LINC01820
1.04178e-11	1.48591	0.7	0.039	3.49393e-07	3	AL590227.1
1.04651e-11	2.29766	0.9	0.087	3.50978e-07	3	BOK-AS1
1.09322e-11	4.13287	1	0.155	3.66644e-07	3	CENPS
1.0973e-11	5.2163	1	0.165	3.68014e-07	3	LINC01811
1.16861e-11	4.34959	1	0.146	3.91927e-07	3	CBLN4
1.18987e-11	3.57871	0.9	0.097	3.99059e-07	3	AC122134.1
1.21754e-11	4.59808	1	0.136	4.08339e-07	3	ZNF256
1.23804e-11	7.48145	1	0.184	4.15214e-07	3	MELTF-AS1
1.28672e-11	3.82473	1	0.146	4.31539e-07	3	IGHE
1.28672e-11	3.72311	1	0.146	4.31539e-07	3	ANKS4B
1.41511e-11	2.91092	0.8	0.058	4.74599e-07	3	AC002467.1
1.4525e-11	4.6346	1	0.165	4.8714e-07	3	AL355103.1
1.45289e-11	3.43435	1	0.155	4.87269e-07	3	MAL2
1.59678e-11	4.20523	1	0.155	5.3553e-07	3	TLCD1
1.6259e-11	6.91444	1	0.184	5.45295e-07	3	TUBB8P12
1.70985e-11	4.14458	0.8	0.068	5.73449e-07	3	AC099560.1
1.77992e-11	7.02474	1	0.184	5.96949e-07	3	AC008940.1
1.79261e-11	2.17402	0.7	0.039	6.01205e-07	3	AC010273.2
1.8252e-11	3.51412	0.9	0.097	6.12136e-07	3	AC105460.2
1.91057e-11	1.38875	0.9	0.078	6.40767e-07	3	PTGDR
1.92334e-11	3.83883	0.8	0.068	6.4505e-07	3	MINDY4B
2.05117e-11	2.19632	0.7	0.039	6.8792e-07	3	AL139161.1
2.12201e-11	2.76153	1	0.107	7.11679e-07	3	ZNF404
2.16287e-11	3.47903	0.8	0.068	7.25383e-07	3	LINC00354
2.23289e-11	4.83467	0.9	0.117	7.48867e-07	3	AB015752.1
2.24233e-11	4.75755	1	0.175	7.52034e-07	3	AC090692.1
2.33278e-11	5.56535	1	0.184	7.82367e-07	3	CLEC4C
2.34613e-11	2.67652	0.7	0.039	7.86846e-07	3	AC107220.1
2.41073e-11	3.4323	0.9	0.107	8.0851e-07	3	AC018442.2
2.55202e-11	5.16802	1	0.184	8.55895e-07	3	PPP1R3C
2.5534e-11	3.34196	1	0.155	8.5636e-07	3	SOX15
2.5534e-11	3.27171	1	0.155	8.5636e-07	3	EFNB2
2.68975e-11	5.66368	1	0.175	9.02087e-07	3	C3orf56
2.8032e-11	4.96355	1	0.155	9.40136e-07	3	FAM72B
2.8032e-11	3.43986	1	0.155	9.40136e-07	3	TBPL2
2.94512e-11	4.32961	1	0.175	9.87735e-07	3	SOHLH2
3.03463e-11	3.1281	1	0.146	1.01775e-06	3	LINC01483
3.04414e-11	5.08646	1	0.165	1.02094e-06	3	AL359237.1
3.05269e-11	4.81915	1	0.184	1.02381e-06	3	GCH1
3.06593e-11	1.82372	0.7	0.039	1.02825e-06	3	GPC5-AS1
3.06593e-11	0.524752	0.7	0.039	1.02825e-06	3	AC009654.1
3.07044e-11	3.78512	0.8	0.068	1.02976e-06	3	AC010230.1
3.22418e-11	4.50582	1	0.175	1.08133e-06	3	RBM46
3.22418e-11	4.40148	1	0.175	1.08133e-06	3	ZAR1
3.37662e-11	4.10765	1	0.155	1.13245e-06	3	PLPP4
3.44884e-11	3.16029	0.8	0.068	1.15667e-06	3	AC010997.3
3.64302e-11	5.13028	0.9	0.107	1.22179e-06	3	AL359762.2
3.6491e-11	5.02687	1	0.184	1.22384e-06	3	COCH
3.65615e-11	3.97398	1	0.165	1.2262e-06	3	TIGD2
3.65615e-11	3.19297	1	0.165	1.2262e-06	3	LINC01799
3.71448e-11	2.46361	0.8	0.058	1.24576e-06	3	TNKS2-AS1
3.82413e-11	3.86023	0.9	0.097	1.28254e-06	3	LINC01844
3.88272e-11	2.0386	1	0.136	1.30219e-06	3	HDGFL1
3.98866e-11	5.96138	1	0.184	1.33772e-06	3	AC026355.1
3.98866e-11	5.30403	1	0.184	1.33772e-06	3	AC079760.2
4.02559e-11	1.95178	1	0.146	1.3501e-06	3	ZCCHC12
4.35908e-11	4.70891	1	0.184	1.46195e-06	3	AC022784.1
4.38806e-11	3.67687	1	0.165	1.47167e-06	3	CD83
4.4049e-11	5.23063	1	0.194	1.47731e-06	3	BBOX1-AS1
4.47227e-11	4.11877	0.9	0.107	1.49991e-06	3	AC007922.3
4.47227e-11	3.09146	0.9	0.107	1.49991e-06	3	LYPD1
4.71398e-11	1.98364	0.9	0.097	1.58098e-06	3	AC006296.2
4.80791e-11	5.25913	1	0.194	1.61248e-06	3	FAM167A-AS1
5.16578e-11	1.41764	1	0.136	1.7325e-06	3	FAM9C
5.24692e-11	6.06801	1	0.194	1.75971e-06	3	PLPPR1
5.48532e-11	2.72414	0.9	0.107	1.83967e-06	3	SNAI3
5.68399e-11	5.23995	1	0.184	1.9063e-06	3	TUBA4A
5.87557e-11	3.36128	1	0.155	1.97055e-06	3	DNAJC3-DT
5.9506e-11	7.23731	0.9	0.126	1.99571e-06	3	AC120193.1
6.04664e-11	3.63073	1	0.175	2.02792e-06	3	MEI4
6.07284e-11	3.27503	0.9	0.107	2.03671e-06	3	LINC01508
6.16846e-11	5.83745	1	0.204	2.06878e-06	3	DEPDC7
6.56172e-11	5.89852	0.9	0.126	2.20067e-06	3	AC007091.1
6.61035e-11	4.08914	1	0.175	2.21698e-06	3	CCNI2
6.72176e-11	3.02998	0.9	0.107	2.25434e-06	3	AC010967.1
6.7218e-11	5.76195	1	0.204	2.25436e-06	3	LINC02204
7.40029e-11	4.13509	1	0.184	2.48191e-06	3	ELOVL4
7.72429e-11	6.11408	1	0.214	2.59057e-06	3	LDHAL6A
7.89622e-11	3.81955	1	0.175	2.64823e-06	3	MMGT1
7.89622e-11	2.85282	1	0.175	2.64823e-06	3	GPR39
8.48141e-11	0.653079	1	0.146	2.84449e-06	3	SPESP1
8.64883e-11	2.57838	0.8	0.068	2.90064e-06	3	FAM85B
8.78002e-11	2.36323	0.9	0.097	2.94464e-06	3	MARCH11
9.03972e-11	4.53494	1	0.165	3.03174e-06	3	TSPAN13
9.42564e-11	3.11503	1	0.175	3.16117e-06	3	CHIC1
9.45993e-11	7.5762	1	0.223	3.17267e-06	3	LMOD3
9.49538e-11	2.23562	0.7	0.049	3.18456e-06	3	AC073283.3
9.68133e-11	4.51084	0.9	0.126	3.24692e-06	3	AC027288.1
1.03309e-10	4.29566	0.8	0.078	3.46478e-06	3	AC009139.1
1.0493e-10	5.38339	1	0.194	3.51914e-06	3	AC103764.1
1.06644e-10	4.36583	0.9	0.126	3.57663e-06	3	RSPH9
1.10728e-10	3.61871	0.9	0.117	3.71358e-06	3	LINC02407
1.1449e-10	3.76264	1	0.184	3.83975e-06	3	DMRTB1
1.17693e-10	5.08522	1	0.214	3.9472e-06	3	PPP1R3D
1.19445e-10	2.63283	0.9	0.097	4.00594e-06	3	PPP1R2B
1.21392e-10	5.18238	1	0.223	4.07124e-06	3	ERCC6L
1.23018e-10	3.49492	0.9	0.107	4.12578e-06	3	LINC01645
1.27975e-10	5.69452	1	0.214	4.29202e-06	3	C6orf52
1.28721e-10	3.57593	0.8	0.078	4.31704e-06	3	DPRX
1.29191e-10	4.50031	1	0.165	4.3328e-06	3	HSF2BP
1.29191e-10	3.03316	1	0.165	4.3328e-06	3	KCNQ1-AS1
1.35702e-10	6.00445	1	0.194	4.55117e-06	3	AC010395.1
1.35702e-10	4.14414	1	0.194	4.55117e-06	3	AKR1C3
1.36019e-10	2.89324	0.8	0.068	4.5618e-06	3	AC007364.1
1.36019e-10	2.59966	0.8	0.068	4.5618e-06	3	AC022884.1
1.36019e-10	1.29174	0.8	0.068	4.5618e-06	3	AL357518.1
1.38021e-10	4.10913	0.7	0.049	4.62895e-06	3	AC084768.1
1.38021e-10	3.17995	0.7	0.049	4.62895e-06	3	RLN1
1.38021e-10	2.58909	0.7	0.049	4.62895e-06	3	AC104823.1
1.39132e-10	6.2506	1	0.214	4.66622e-06	3	RIIAD1
1.43624e-10	2.95726	0.8	0.078	4.81685e-06	3	FAM72C
1.54278e-10	2.5104	1	0.165	5.17417e-06	3	LHX2
1.56688e-10	2.84458	0.9	0.126	5.255e-06	3	B3GNT4
1.601e-10	5.22374	0.9	0.136	5.36945e-06	3	LINC00458
1.64372e-10	4.68225	1	0.214	5.51272e-06	3	ACTL8
1.68907e-10	6.29598	1	0.223	5.66482e-06	3	LINC01118
1.75236e-10	3.86228	1	0.194	5.87707e-06	3	ARL4C
1.7866e-10	3.2827	0.8	0.078	5.99189e-06	3	TMEM252
1.8323e-10	2.62928	0.9	0.107	6.14517e-06	3	ROPN1L
1.8323e-10	2.40546	0.9	0.107	6.14517e-06	3	PHOSPHO2
1.90445e-10	2.82376	0.8	0.068	6.38714e-06	3	LINC02022
1.90762e-10	2.26339	1	0.194	6.39779e-06	3	FBXO27
1.922e-10	3.2837	1	0.184	6.446e-06	3	PDZK1
1.93313e-10	2.27985	1	0.146	6.48335e-06	3	IL1RAPL2
1.98566e-10	2.60974	0.9	0.097	6.65951e-06	3	AC097512.1
1.98974e-10	4.19924	0.9	0.117	6.67318e-06	3	AC022113.1
2.01062e-10	3.48223	1	0.165	6.7432e-06	3	ZFP69B
2.02346e-10	4.43293	1	0.204	6.78629e-06	3	MTM1
2.16041e-10	5.02429	1	0.223	7.24559e-06	3	NR2E1
2.16861e-10	7.12524	1	0.243	7.2731e-06	3	LINC02105
2.22001e-10	3.84628	0.8	0.078	7.44546e-06	3	GPHA2
2.22001e-10	2.93282	0.8	0.078	7.44546e-06	3	LINC00383
2.2615e-10	1.93411	0.7	0.049	7.58461e-06	3	AC007749.1
2.28118e-10	3.34546	1	0.184	7.65062e-06	3	C1orf226
2.28984e-10	4.679	1	0.214	7.67968e-06	3	FAM19A4
2.29907e-10	5.64791	0.9	0.146	7.71061e-06	3	AC106882.1
2.3444e-10	5.07799	1	0.223	7.86264e-06	3	MAEL
2.3444e-10	4.93292	1	0.223	7.86264e-06	3	CIART
2.38008e-10	2.23227	0.8	0.068	7.98231e-06	3	UGT2A1
2.41484e-10	2.57873	0.9	0.117	8.09887e-06	3	LRRC38
2.43986e-10	4.28644	0.8	0.087	8.1828e-06	3	RIT2
2.45849e-10	4.68312	1	0.194	8.24527e-06	3	NPM2
2.55593e-10	5.20774	0.9	0.136	8.57208e-06	3	AP000790.3
2.75556e-10	2.7401	0.8	0.078	9.24159e-06	3	AL022313.2
2.75942e-10	5.12368	1	0.223	9.25456e-06	3	FGF9
2.92821e-10	2.89838	0.9	0.117	9.82063e-06	3	AC093772.1
2.92821e-10	2.4962	0.9	0.117	9.82063e-06	3	AL355338.1
2.98532e-10	5.96478	1	0.243	1.00122e-05	3	IRF6
2.99967e-10	1.94901	0.9	0.107	1.00603e-05	3	GNAT3
3.01055e-10	3.159	0.8	0.087	1.00968e-05	3	EFNA3
3.06874e-10	2.86197	0.8	0.078	1.02919e-05	3	RERG-AS1
3.06874e-10	2.13969	0.8	0.078	1.02919e-05	3	AP001065.1
3.1637e-10	2.9994	1	0.194	1.06104e-05	3	SLC35G2
3.42042e-10	6.82608	1	0.252	1.14714e-05	3	TENT5C
3.44002e-10	3.67112	1	0.194	1.15371e-05	3	THAP1
3.49951e-10	5.43264	1	0.243	1.17366e-05	3	BMP6
3.53406e-10	4.82579	1	0.233	1.18525e-05	3	TDRP
3.68483e-10	1.90101	0.7	0.049	1.23582e-05	3	AC124276.1
3.69993e-10	7.65259	1	0.252	1.24088e-05	3	ZP4
3.78807e-10	5.76833	1	0.243	1.27044e-05	3	PCP4L1
3.78807e-10	5.73186	1	0.243	1.27044e-05	3	ADAD1
3.79605e-10	5.08129	0.9	0.155	1.27312e-05	3	ZP1
3.80282e-10	2.37294	0.8	0.078	1.27539e-05	3	OR2T4
4.06515e-10	2.67252	1	0.194	1.36337e-05	3	EFHC2
4.09981e-10	6.22779	1	0.243	1.375e-05	3	TCL1A
4.09981e-10	5.63597	1	0.243	1.375e-05	3	PLEK2
4.1501e-10	5.33994	0.9	0.155	1.39186e-05	3	BFSP2-AS1
4.15952e-10	1.87447	0.7	0.049	1.39502e-05	3	AC090125.1
4.15952e-10	1.64749	0.7	0.049	1.39502e-05	3	AL031316.1
4.33901e-10	1.76095	1	0.146	1.45522e-05	3	CGREF1
4.4235e-10	2.00554	0.9	0.097	1.48355e-05	3	TMEM54
4.43656e-10	5.14455	1	0.243	1.48793e-05	3	LHX8
4.50644e-10	6.97489	1	0.262	1.51137e-05	3	RSPO2
4.56943e-10	2.64525	0.8	0.087	1.53249e-05	3	AC138305.1
4.85797e-10	4.46865	1	0.223	1.62927e-05	3	CASC8
4.85797e-10	3.81374	1	0.223	1.62927e-05	3	DNAJB9
4.86208e-10	4.12141	1	0.233	1.63065e-05	3	CRISPLD1
4.88415e-10	1.57377	0.9	0.097	1.63804e-05	3	KCNK18
4.89438e-10	3.4646	1	0.175	1.64148e-05	3	PRADC1
5.19378e-10	2.61158	0.9	0.117	1.74189e-05	3	RASL11A
5.19378e-10	1.98698	0.9	0.117	1.74189e-05	3	TEX37
5.21567e-10	3.1492	1	0.194	1.74923e-05	3	PTPRD-AS1
5.23529e-10	1.50936	0.8	0.078	1.75581e-05	3	AC090282.1
5.26374e-10	0.729578	1	0.233	1.76535e-05	3	FBXO45
5.32837e-10	3.05332	1	0.175	1.78703e-05	3	LINC00943
5.3461e-10	4.26848	0.9	0.136	1.79297e-05	3	AC092378.1
5.66559e-10	2.79948	1	0.194	1.90012e-05	3	CDKN2AIP
5.69867e-10	4.07829	0.9	0.146	1.91122e-05	3	AC078881.1
5.70748e-10	1.38939	1	0.165	1.91418e-05	3	LRRC4
5.75764e-10	4.78889	0.8	0.097	1.931e-05	3	LINC02553
6.16654e-10	4.74761	1	0.233	2.06813e-05	3	PKP4-AS1
6.38579e-10	4.74944	1	0.252	2.14167e-05	3	TDRD6
6.41626e-10	4.36762	0.9	0.136	2.15189e-05	3	CDA
6.62486e-10	5.96672	1	0.262	2.22185e-05	3	DCDC2
6.67292e-10	4.05934	1	0.233	2.23796e-05	3	GGACT
6.68866e-10	4.4167	1	0.223	2.24324e-05	3	AL021395.1
6.77451e-10	3.16986	1	0.165	2.27203e-05	3	CFAP77
6.81711e-10	4.54543	0.9	0.146	2.28632e-05	3	BCAR4
6.89687e-10	3.36388	0.9	0.117	2.31307e-05	3	PCAT4
6.89687e-10	2.20044	0.9	0.117	2.31307e-05	3	AC006974.1
6.89687e-10	1.55846	0.9	0.117	2.31307e-05	3	AC078845.1
6.9069e-10	2.86997	0.8	0.087	2.31644e-05	3	YY2
6.9069e-10	2.35903	0.8	0.087	2.31644e-05	3	TENT5D
6.9069e-10	2.28874	0.8	0.087	2.31644e-05	3	CRB3
6.97559e-10	3.0409	1	0.204	2.33947e-05	3	PPP3R1
7.06139e-10	2.89191	0.9	0.126	2.36825e-05	3	SCG2
7.06139e-10	2.75535	0.9	0.126	2.36825e-05	3	LINC02198
7.10197e-10	4.65125	1	0.243	2.38186e-05	3	NKIRAS1
7.10197e-10	3.94324	1	0.243	2.38186e-05	3	ZAR1L
7.15251e-10	6.05378	1	0.262	2.39881e-05	3	NLRP14
7.15251e-10	5.87752	1	0.262	2.39881e-05	3	NLRP9
7.15251e-10	4.72706	1	0.262	2.39881e-05	3	CCDC73
7.16255e-10	3.49826	1	0.214	2.40218e-05	3	CNBD1
7.18972e-10	1.94055	0.8	0.078	2.41129e-05	3	AC022167.5
7.21979e-10	4.84283	1	0.233	2.42137e-05	3	AF279873.3
7.32422e-10	5.96286	1	0.272	2.4564e-05	3	DDX4
7.65346e-10	3.30005	0.8	0.087	2.56682e-05	3	HIST1H2BK
7.65346e-10	2.38968	0.8	0.087	2.56682e-05	3	AL392023.2
7.79684e-10	3.56225	0.7	0.058	2.6149e-05	3	AC006960.2
7.9873e-10	4.62275	0.8	0.078	2.67878e-05	3	TRBV12-3
7.9873e-10	1.71842	0.8	0.078	2.67878e-05	3	HIST1H2BJ
7.9873e-10	1.1157	0.8	0.078	2.67878e-05	3	AC004816.1
8.20449e-10	3.79336	1	0.204	2.75162e-05	3	LINC02177
8.20449e-10	3.33212	1	0.204	2.75162e-05	3	BNC1
8.29799e-10	7.23989	1	0.243	2.78298e-05	3	DUSP7
8.29799e-10	4.34638	1	0.243	2.78298e-05	3	SGMS2
8.40854e-10	3.64435	1	0.214	2.82005e-05	3	AC004943.2
8.41223e-10	4.72424	0.9	0.155	2.82129e-05	3	LIPC-AS1
8.44782e-10	5.51252	1	0.233	2.83323e-05	3	BAALC
8.49155e-10	2.11859	0.9	0.126	2.8479e-05	3	AC139099.2
8.52201e-10	7.31919	1	0.272	2.85811e-05	3	BTG4
8.6948e-10	4.50095	1	0.252	2.91606e-05	3	NCEH1
8.76603e-10	2.68289	1	0.184	2.93995e-05	3	STOX1
8.99352e-10	5.03474	1	0.262	3.01625e-05	3	OOEP
9.21978e-10	4.62228	0.9	0.136	3.09213e-05	3	LINC01208
9.39013e-10	2.83362	0.8	0.087	3.14926e-05	3	AC015689.1
9.39013e-10	2.49348	0.8	0.087	3.14926e-05	3	LINC02059
9.61068e-10	2.00263	1	0.175	3.22323e-05	3	ZNF132
9.94105e-10	2.7091	1	0.223	3.33403e-05	3	ZNF222
1.00641e-09	3.28478	1	0.194	3.37529e-05	3	KCNN2
1.03971e-09	2.22891	0.8	0.087	3.48697e-05	3	DGUOK-AS1
1.06845e-09	5.99395	1	0.272	3.58336e-05	3	CPEB1
1.10386e-09	3.24082	0.9	0.136	3.70213e-05	3	KDF1
1.12938e-09	5.80069	1	0.262	3.78771e-05	3	SLC3A1
1.1328e-09	3.878	1	0.204	3.79917e-05	3	HSF5
1.1509e-09	2.23749	0.8	0.087	3.85989e-05	3	LINC01318
1.1545e-09	3.70334	1	0.233	3.87196e-05	3	PLAG1
1.15881e-09	3.43717	0.8	0.097	3.8864e-05	3	AC018754.1
1.16152e-09	5.56345	1	0.282	3.89552e-05	3	HHLA2
1.16157e-09	4.05653	0.9	0.146	3.89567e-05	3	EFCAB10
1.18111e-09	5.47198	1	0.252	3.9612e-05	3	ZNF57
1.18111e-09	4.12095	1	0.252	3.9612e-05	3	CLCN4
1.19224e-09	3.87479	0.9	0.155	3.99855e-05	3	PKIA-AS1
1.20748e-09	3.4542	0.9	0.136	4.04964e-05	3	LINC02212
1.20905e-09	1.72797	0.9	0.117	4.05492e-05	3	AC005064.1
1.21331e-09	2.38071	0.8	0.078	4.06919e-05	3	COX4I2
1.21904e-09	2.18093	1	0.184	4.08843e-05	3	CCM2L
1.22744e-09	3.66574	1	0.204	4.1166e-05	3	NEK2
1.23199e-09	3.4565	0.7	0.058	4.13185e-05	3	LINC01612
1.27932e-09	2.26459	0.8	0.097	4.29058e-05	3	AL354719.2
1.31888e-09	4.74826	1	0.243	4.42325e-05	3	BRINP1
1.36112e-09	3.91243	1	0.223	4.56493e-05	3	WDR44
1.37538e-09	5.09124	1	0.252	4.61277e-05	3	FGF14
1.41641e-09	4.01587	1	0.262	4.75036e-05	3	C12orf75
1.44042e-09	2.56048	1	0.204	4.8309e-05	3	PPM1E
1.4416e-09	4.45528	1	0.272	4.83484e-05	3	BORCS5
1.4416e-09	4.13953	1	0.272	4.83484e-05	3	NKX3-1
1.45693e-09	3.65525	1	0.233	4.88626e-05	3	ZNF235
1.457e-09	2.07411	1	0.175	4.8865e-05	3	C5orf47
1.47179e-09	4.30165	1	0.223	4.93608e-05	3	HTR3C
1.47179e-09	3.77656	1	0.223	4.93608e-05	3	IGFBP3
1.53674e-09	5.54919	0.8	0.117	5.15392e-05	3	DCAF4L2
1.53674e-09	1.669	0.9	0.107	5.15392e-05	3	SWSAP1
1.57394e-09	3.33556	1	0.233	5.2787e-05	3	DDX59
1.57852e-09	2.56429	0.9	0.136	5.29403e-05	3	XKR8
1.58262e-09	1.83626	1	0.175	5.30778e-05	3	RFESD
1.59121e-09	3.90085	1	0.223	5.33659e-05	3	TEX30
1.59614e-09	2.26102	0.9	0.117	5.35313e-05	3	NAA11
1.64605e-09	4.46464	1	0.262	5.52053e-05	3	PNLDC1
1.69067e-09	1.77805	1	0.184	5.67017e-05	3	MNS1
1.72355e-09	4.0881	0.8	0.087	5.78044e-05	3	AC026765.2
1.72355e-09	2.87744	0.8	0.087	5.78044e-05	3	LINC00491
1.7253e-09	2.94063	0.9	0.136	5.78631e-05	3	AL441992.1
1.76095e-09	2.92471	0.9	0.126	5.90586e-05	3	PRSS2
1.79088e-09	3.51814	1	0.243	6.00626e-05	3	FAM174B
1.80068e-09	5.32086	1	0.291	6.03911e-05	3	GDAP1
1.80129e-09	3.22123	0.9	0.146	6.04117e-05	3	SPR
1.80206e-09	5.43943	1	0.272	6.04376e-05	3	AVEN
1.80206e-09	4.68205	1	0.272	6.04376e-05	3	ADO
1.80206e-09	4.64617	1	0.272	6.04376e-05	3	CD38
1.80469e-09	4.95513	0.7	0.068	6.05256e-05	3	AL161804.1
1.86629e-09	1.83182	1	0.175	6.25917e-05	3	RRAGB
1.91875e-09	2.36221	0.9	0.117	6.43509e-05	3	AC116903.2
1.93658e-09	2.35928	0.7	0.058	6.49491e-05	3	C10orf120
1.94875e-09	6.67446	1	0.282	6.53571e-05	3	SLC41A2
1.96534e-09	3.70337	0.9	0.146	6.59136e-05	3	AC007529.2
1.98265e-09	4.1841	1	0.233	6.6494e-05	3	DAZL
2.00047e-09	3.66388	0.8	0.107	6.70917e-05	3	AC131094.1
2.00894e-09	3.85093	1	0.223	6.73758e-05	3	OLFML1
2.00894e-09	3.38843	1	0.223	6.73758e-05	3	SAXO1
2.00894e-09	3.06957	1	0.223	6.73758e-05	3	AUNIP
2.08174e-09	2.62994	1	0.194	6.98174e-05	3	SPATA4
2.0971e-09	4.31945	1	0.282	7.03324e-05	3	RCCD1
2.0971e-09	3.58398	1	0.282	7.03324e-05	3	ZNF215
2.10594e-09	2.21607	0.8	0.087	7.06289e-05	3	AC099518.1
2.14282e-09	3.40955	1	0.204	7.18659e-05	3	IRGM
2.16666e-09	2.04841	0.7	0.058	7.26654e-05	3	AC010186.1
2.16666e-09	1.62775	0.7	0.058	7.26654e-05	3	AL627309.1
2.17207e-09	3.56652	1	0.214	7.28468e-05	3	ABHD12B
2.17207e-09	3.53225	1	0.214	7.28468e-05	3	AC026401.3
2.24028e-09	5.15227	1	0.291	7.51345e-05	3	CCNJ
2.24028e-09	5.01788	1	0.291	7.51345e-05	3	FAM220A
2.30456e-09	1.59433	0.9	0.117	7.72902e-05	3	TACR3
2.33842e-09	0.674057	1	0.184	7.84259e-05	3	ZSCAN16
2.35776e-09	2.39346	1	0.155	7.90745e-05	3	AC007255.1
2.36763e-09	6.01388	1	0.301	7.94057e-05	3	TAF9B
2.37318e-09	4.1613	0.9	0.155	7.95918e-05	3	LINC01478
2.42328e-09	0.788197	0.7	0.058	8.12721e-05	3	TMEM52
2.4422e-09	3.01638	1	0.194	8.19067e-05	3	AC012636.1
2.49564e-09	1.05852	0.8	0.078	8.36986e-05	3	CCDC96
2.49955e-09	3.73337	0.7	0.068	8.38298e-05	3	AC020636.1
2.49955e-09	3.10283	0.7	0.068	8.38298e-05	3	AL591518.1
2.53281e-09	4.92822	1	0.223	8.49454e-05	3	TIMD4
2.54414e-09	5.95655	1	0.301	8.53252e-05	3	KPNA7
2.58989e-09	2.3896	1	0.175	8.68598e-05	3	FAM89A
2.58989e-09	1.78638	1	0.175	8.68598e-05	3	PON1
2.60668e-09	5.70133	1	0.272	8.7423e-05	3	GABRR3
2.61123e-09	5.13347	1	0.282	8.75755e-05	3	PAIP2B
2.7142e-09	2.57194	1	0.204	9.10287e-05	3	LRRC3B
2.77252e-09	3.99749	1	0.262	9.29848e-05	3	TDRD1
2.78378e-09	5.00283	1	0.291	9.33625e-05	3	ZNF597
2.78452e-09	2.55571	0.7	0.068	9.33871e-05	3	AC023906.5
2.80523e-09	4.6628	1	0.272	9.40818e-05	3	B4GALT6
2.80976e-09	1.45272	1	0.175	9.42337e-05	3	PARS2
2.82513e-09	1.88733	1	0.165	9.47491e-05	3	SH3BGR
2.83882e-09	1.39079	0.8	0.087	9.52082e-05	3	TWIST1
2.86319e-09	2.84882	1	0.194	9.60258e-05	3	C8orf76
2.90417e-09	3.24788	1	0.233	9.74001e-05	3	GLIPR1
2.9194e-09	3.6706	1	0.252	9.7911e-05	3	GSKIP
2.95364e-09	2.9563	1	0.223	9.90593e-05	3	ZNF883
2.95364e-09	2.43098	1	0.223	9.90593e-05	3	TMEM206
3.02836e-09	1.87033	0.7	0.058	0.000101565	3	SHISA8
3.06259e-09	4.08653	0.9	0.155	0.000102713	3	LDHC
3.08237e-09	4.51516	0.8	0.097	0.000103377	3	AC092920.1
3.14509e-09	4.94029	1	0.252	0.00010548	3	AC109779.1
3.15404e-09	5.28649	1	0.301	0.00010578	3	AL022068.1
3.1726e-09	6.52748	1	0.32	0.000106403	3	WEE2
3.17489e-09	4.28436	1	0.204	0.000106479	3	LINC01695
3.18886e-09	3.45907	1	0.223	0.000106948	3	RNF185
3.18886e-09	2.63269	1	0.223	0.000106948	3	KCTD21
3.29512e-09	3.32819	0.9	0.165	0.000110512	3	ZNF540
3.38772e-09	3.07462	1	0.252	0.000113618	3	MB21D2
3.43294e-09	2.53325	1	0.204	0.000115134	3	FOXR1
3.45489e-09	6.16879	1	0.291	0.00011587	3	C10orf82
3.4597e-09	2.68832	0.8	0.087	0.000116032	3	AP003096.1
3.47016e-09	3.03852	0.9	0.175	0.000116382	3	PEX12
3.49118e-09	3.66374	1	0.282	0.000117087	3	TIFA
3.49334e-09	4.02979	1	0.272	0.00011716	3	IL23R
3.63742e-09	5.12247	1	0.301	0.000121992	3	ZNF799
3.64501e-09	4.0296	1	0.233	0.000122246	3	NLRP8
3.65154e-09	6.73374	1	0.32	0.000122465	3	EBF1
3.65154e-09	5.74554	1	0.32	0.000122465	3	HDC
3.73749e-09	2.37505	0.8	0.097	0.000125348	3	ST8SIA6-AS1
3.79206e-09	5.23981	1	0.311	0.000127178	3	THBS4
3.80592e-09	3.34744	0.9	0.136	0.000127643	3	C16orf74
3.84258e-09	2.89826	0.7	0.068	0.000128872	3	AC013553.4
3.84258e-09	2.82089	0.7	0.068	0.000128872	3	AP000593.3
3.84258e-09	2.73701	0.7	0.068	0.000128872	3	AC024084.1
3.84258e-09	2.68489	0.7	0.068	0.000128872	3	AL356133.2
3.88206e-09	5.02008	0.8	0.107	0.000130196	3	LINC02450
3.98722e-09	4.05438	1	0.291	0.000133724	3	CERKL
4.03343e-09	4.57104	1	0.282	0.000135273	3	RTN4IP1
4.03791e-09	2.75113	1	0.214	0.000135423	3	SH3GL2
4.0983e-09	1.90871	1	0.184	0.000137449	3	GEM
4.22731e-09	3.88719	0.9	0.165	0.000141775	3	AC019270.1
4.33572e-09	4.56435	1	0.204	0.000145411	3	CLEC10A
4.33572e-09	2.49902	1	0.204	0.000145411	3	YBX2
4.34629e-09	2.3151	0.9	0.117	0.000145766	3	CAVIN3
4.50033e-09	4.44067	1	0.301	0.000150932	3	CCDC15
4.50033e-09	3.16139	1	0.301	0.000150932	3	ZNF443
4.52743e-09	3.76654	0.9	0.136	0.000151841	3	INA
4.54594e-09	3.79956	0.8	0.126	0.000152462	3	LINC01708
4.6372e-09	3.73041	1	0.262	0.000155522	3	DDX43
4.81108e-09	3.95103	0.9	0.175	0.000161354	3	LAD1
4.98791e-09	4.48818	1	0.262	0.000167285	3	SCGB3A2
5.02366e-09	4.9933	1	0.311	0.000168484	3	CFAP58
5.03612e-09	4.09941	0.7	0.078	0.000168901	3	AC008517.1
5.08167e-09	3.04107	1	0.214	0.000170429	3	UPP2
5.12809e-09	3.02758	1	0.243	0.000171986	3	HABP2
5.17767e-09	2.4016	1	0.32	0.000173649	3	GNPDA2
5.27509e-09	4.28528	1	0.252	0.000176916	3	MCPH1-AS1
5.28818e-09	2.44129	0.7	0.068	0.000177355	3	HOXD8
5.28818e-09	2.20914	0.7	0.068	0.000177355	3	AC010551.3
5.30191e-09	4.44976	1	0.291	0.000177815	3	ZNF267
5.30191e-09	3.95418	1	0.291	0.000177815	3	FBLN7
5.36438e-09	1.75127	1	0.262	0.000179911	3	ZNF416
5.37351e-09	1.7725	1	0.194	0.000180217	3	NTN1
5.38138e-09	1.41511	0.9	0.136	0.000180481	3	F8A1
5.4847e-09	2.67396	1	0.214	0.000183946	3	KCNK5
5.51637e-09	2.86744	0.9	0.155	0.000185008	3	BARX2
5.71844e-09	4.43296	1	0.233	0.000191785	3	CXXC4
5.85376e-09	4.32236	1	0.223	0.000196323	3	THAP9
5.86453e-09	0.883575	0.7	0.058	0.000196685	3	AL354712.1
5.96616e-09	4.17375	1	0.301	0.000200093	3	GCNT3
6.07211e-09	7.31461	1	0.33	0.000203646	3	AP000790.4
6.14835e-09	4.89869	1	0.34	0.000206203	3	ZNF10
6.19477e-09	6.01024	1	0.311	0.00020776	3	BMT2
6.19922e-09	3.83916	1	0.282	0.000207909	3	GNA14
6.22385e-09	1.40369	0.8	0.087	0.000208735	3	TCF15
6.23177e-09	3.56829	1	0.272	0.000209001	3	FAM122A
6.2863e-09	4.56965	0.9	0.184	0.00021083	3	AC046195.1
6.2863e-09	3.17811	0.9	0.184	0.00021083	3	SIGLEC10
6.39973e-09	4.21849	1	0.301	0.000214634	3	CENPA
6.51529e-09	3.46873	0.9	0.155	0.00021851	3	C3orf49
6.55589e-09	3.60487	1	0.291	0.000219871	3	FAM84B
6.58579e-09	2.02621	1	0.184	0.000220874	3	PIGH
6.63658e-09	3.14189	1	0.233	0.000222578	3	RUNDC3B
6.64118e-09	4.81254	1	0.311	0.000222732	3	GRHL1
6.66727e-09	3.65672	1	0.262	0.000223607	3	PIWIL3
6.85073e-09	4.07438	0.7	0.078	0.00022976	3	AC027541.1
7.03471e-09	4.00614	1	0.291	0.00023593	3	MLF1
7.05094e-09	7.23556	1	0.359	0.000236474	3	OOSP2
7.07444e-09	6.32469	1	0.35	0.000237262	3	OTX2
7.25774e-09	2.27497	0.7	0.068	0.00024341	3	AC087379.2
7.31768e-09	4.70947	1	0.32	0.00024542	3	CR2
7.36072e-09	3.94744	1	0.301	0.000246864	3	SLC35G1
7.43356e-09	4.18941	1	0.204	0.000249307	3	TDRD5
7.45894e-09	4.85218	1	0.33	0.000250158	3	GKAP1
7.46137e-09	5.95354	1	0.369	0.000250239	3	ELAVL2
7.54099e-09	7.38199	1	0.359	0.00025291	3	DUSP10
7.56902e-09	6.12001	1	0.35	0.00025385	3	TUBB8
7.56902e-09	6.05127	1	0.35	0.00025385	3	INSIG2
7.62978e-09	4.55463	1	0.311	0.000255888	3	GRIK2
7.67107e-09	3.53593	1	0.282	0.000257272	3	GPR160
7.68928e-09	2.31513	0.9	0.155	0.000257883	3	FAM41C
7.70176e-09	2.80378	1	0.262	0.000258302	3	FBXO43
7.72442e-09	6.55259	1	0.272	0.000259062	3	AP000790.2
7.75971e-09	4.5669	0.8	0.126	0.000260245	3	SPDYC
7.98628e-09	4.87261	1	0.33	0.000267844	3	PATL2
7.98628e-09	4.38937	1	0.33	0.000267844	3	GPR158
8.06063e-09	1.83895	0.7	0.068	0.000270337	3	LINC02313
8.06063e-09	0.585732	0.7	0.068	0.000270337	3	LINC01625
8.17096e-09	2.45966	1	0.252	0.000274038	3	MTMR3
8.23333e-09	4.40308	1	0.282	0.000276129	3	ACCSL
8.27594e-09	3.83776	1	0.262	0.000277559	3	PRLHR
8.27594e-09	3.04009	1	0.262	0.000277559	3	FAM104A
8.28805e-09	1.28985	1	0.233	0.000277965	3	NR1H4
8.39459e-09	3.35912	0.9	0.146	0.000281538	3	C19orf38
8.51393e-09	1.98539	1	0.223	0.00028554	3	RAB38
8.55664e-09	5.41192	0.9	0.204	0.000286972	3	RNF122
8.89166e-09	3.26513	1	0.262	0.000298208	3	SYT2
8.90698e-09	3.625	1	0.272	0.000298722	3	SYNM
8.90698e-09	3.19664	1	0.272	0.000298722	3	TAF4B
8.90698e-09	2.95761	1	0.272	0.000298722	3	UBTD2
8.94725e-09	5.26987	1	0.379	0.000300073	3	RRAS2
9.06798e-09	2.93196	0.9	0.155	0.000304122	3	RAX2
9.12705e-09	1.83621	0.9	0.146	0.000306103	3	STIMATE
9.21827e-09	4.6723	1	0.359	0.000309162	3	FUT8
9.31668e-09	2.44002	1	0.214	0.000312463	3	DIRAS3
9.4431e-09	2.46645	1	0.252	0.000316703	3	TMOD1
9.4431e-09	2.20461	1	0.252	0.000316703	3	ZNF449
9.54231e-09	1.27396	1	0.165	0.00032003	3	HTR5A
9.58368e-09	3.04892	0.9	0.165	0.000321417	3	LINC02223
9.65279e-09	2.40629	0.8	0.097	0.000323735	3	SSMEM1
9.70462e-09	5.40187	0.9	0.214	0.000325474	3	DSG2-AS1
9.84465e-09	2.28039	0.9	0.155	0.00033017	3	C4orf19
9.85406e-09	5.21302	1	0.359	0.000330485	3	SYCP2
9.85406e-09	5.13207	1	0.359	0.000330485	3	SASS6
1.01187e-08	4.67108	0.9	0.194	0.000339361	3	NRG4
1.01494e-08	3.59288	1	0.252	0.000340391	3	NAIP
1.01494e-08	3.08431	1	0.252	0.000340391	3	ZNF676
1.06553e-08	2.04138	0.9	0.136	0.000357357	3	IL17B
1.06553e-08	0.718197	0.9	0.136	0.000357357	3	COG8.1
1.07505e-08	1.84344	0.8	0.107	0.000360551	3	FOXQ1
1.0907e-08	2.42939	1	0.252	0.000365797	3	AHR
1.09345e-08	3.45318	0.9	0.194	0.00036672	3	CCDC121
1.10171e-08	4.62314	1	0.272	0.000369493	3	FAM167A
1.10171e-08	2.8544	1	0.272	0.000369493	3	KLF11
1.10225e-08	3.85824	0.7	0.068	0.000369672	3	AC106900.1
1.10225e-08	1.58218	0.7	0.068	0.000369672	3	AL592431.1
1.11227e-08	2.60183	1	0.233	0.000373033	3	ZNF280C
1.11634e-08	3.67975	1	0.301	0.000374398	3	LSM11
1.12161e-08	3.97077	1	0.33	0.000376165	3	GLDN
1.13235e-08	4.76018	1	0.35	0.000379766	3	HENMT1
1.15946e-08	2.31746	0.9	0.136	0.00038886	3	ZNF749
1.16356e-08	1.12352	0.8	0.097	0.000390235	3	AC078883.1
1.17023e-08	2.79284	1	0.282	0.000392471	3	CDK8
1.1717e-08	2.10847	0.9	0.146	0.000392963	3	PROSER2
1.1967e-08	5.10318	1	0.233	0.000401349	3	SUGCT
1.21044e-08	5.66219	1	0.35	0.000405959	3	NLRP13
1.21044e-08	3.8397	1	0.35	0.000405959	3	IL13RA1
1.22074e-08	1.54894	1	0.155	0.00040941	3	RDH14
1.2227e-08	2.60312	0.7	0.068	0.000410068	3	AC017104.3
1.23491e-08	2.84001	1	0.311	0.000414165	3	ZNF281
1.25674e-08	2.79922	1	0.214	0.000421486	3	AC062028.1
1.25828e-08	3.08221	0.9	0.155	0.000422002	3	UBE2U
1.26859e-08	2.1901	1	0.272	0.000425461	3	DDIAS
1.29343e-08	4.11567	1	0.34	0.00043379	3	ZNF569
1.29377e-08	5.4483	1	0.35	0.000433903	3	ZP2
1.32707e-08	3.11451	1	0.243	0.000445073	3	ARG2
1.361e-08	2.85178	1	0.272	0.000456451	3	MAPK4
1.3641e-08	6.12959	0.9	0.175	0.000457491	3	ZNF575
1.38226e-08	3.15569	0.9	0.184	0.000463583	3	FIRRE
1.41298e-08	3.20159	1	0.291	0.000473886	3	ELK3
1.41298e-08	2.50532	1	0.291	0.000473886	3	PODXL
1.446e-08	6.8713	1	0.369	0.000484961	3	DPPA5
1.446e-08	5.34929	1	0.369	0.000484961	3	PTN
1.44743e-08	4.7062	1	0.32	0.000485439	3	SALL3
1.45993e-08	3.12344	1	0.272	0.00048963	3	WLS
1.46138e-08	5.3988	0.9	0.204	0.000490118	3	SHD
1.46648e-08	4.43603	1	0.359	0.000491827	3	EPCAM
1.46835e-08	4.61307	1	0.33	0.000492456	3	CASC1
1.46835e-08	4.00302	1	0.33	0.000492456	3	TC2N
1.47825e-08	5.40007	1	0.34	0.000495776	3	AC007388.1
1.47825e-08	4.34155	1	0.34	0.000495776	3	LINC01252
1.48908e-08	3.02037	1	0.233	0.000499406	3	MAP7
1.50154e-08	2.16361	0.9	0.146	0.000503588	3	CYP7B1
1.50315e-08	1.9792	0.7	0.068	0.000504126	3	AC004130.1
1.51227e-08	5.05756	1	0.379	0.000507184	3	CNOT11
1.54608e-08	1.89268	0.8	0.107	0.000518526	3	AC092903.2
1.5598e-08	2.75234	1	0.252	0.000523126	3	GPC3
1.57094e-08	6.24755	1	0.388	0.000526862	3	PADI6
1.57856e-08	4.99942	1	0.35	0.000529417	3	HYLS1
1.58004e-08	5.3567	1	0.34	0.000529914	3	CCDC27
1.59704e-08	2.36673	0.9	0.175	0.000535616	3	EIF4E1B
1.60552e-08	2.41356	0.9	0.155	0.000538461	3	DOK2
1.61392e-08	6.03346	1	0.379	0.000541277	3	MXD1
1.61483e-08	3.32302	0.9	0.184	0.000541582	3	SMIM13
1.62145e-08	6.34224	1	0.398	0.000543803	3	NLRP11
1.63034e-08	1.60609	0.9	0.146	0.000546782	3	AC005229.4
1.66337e-08	5.6611	1	0.408	0.000557862	3	COL28A1
1.66589e-08	1.09904	0.7	0.068	0.000558706	3	LINC02586
1.67918e-08	2.67577	1	0.272	0.000563162	3	B3GALNT2
1.67918e-08	2.54963	1	0.272	0.000563162	3	EFCAB7
1.6849e-08	4.09894	1	0.301	0.00056508	3	UNC93A
1.69803e-08	2.75883	0.7	0.078	0.000569484	3	AC003975.1
1.70035e-08	1.95807	1	0.194	0.000570262	3	MIF4GD
1.70544e-08	3.00477	0.8	0.126	0.000571972	3	AC018816.1
1.71853e-08	4.45898	0.8	0.136	0.000576361	3	LYPD4
1.72138e-08	2.61538	1	0.233	0.000577316	3	WDCP
1.72757e-08	2.89181	0.9	0.175	0.000579394	3	ALOX15
1.74074e-08	2.34423	0.9	0.155	0.000583808	3	CHAC1
1.76983e-08	2.55464	0.9	0.146	0.000593566	3	AC092723.5
1.80047e-08	3.21775	1	0.272	0.000603843	3	AMIGO1
1.80256e-08	2.33045	1	0.184	0.000604541	3	IQCD
1.8037e-08	3.30009	1	0.301	0.000604926	3	POLR3G
1.80809e-08	4.08785	1	0.262	0.000606398	3	DAW1
1.80809e-08	2.69945	1	0.262	0.000606398	3	PPM1D
1.8437e-08	6.58681	1	0.398	0.000618339	3	MYOCOS
1.86844e-08	3.19307	0.9	0.175	0.000626638	3	ZSWIM3
1.89005e-08	5.02878	1	0.408	0.000633885	3	ETV5
1.89452e-08	4.03449	1	0.32	0.000635384	3	IQUB
1.91498e-08	0.296972	1	0.223	0.000642245	3	SNX12
1.93956e-08	2.08368	1	0.262	0.000650489	3	GNPNAT1
1.95961e-08	1.54782	1	0.214	0.000657214	3	ZNF805
1.98118e-08	2.18732	1	0.204	0.000664448	3	RNLS
1.98872e-08	2.3134	1	0.233	0.000666977	3	NR2C2AP
2.00532e-08	3.8832	0.7	0.087	0.000672545	3	AP002347.1
2.0392e-08	2.35835	1	0.282	0.000683905	3	GAREM2
2.04085e-08	2.69114	1	0.243	0.000684459	3	WDSUB1
2.04085e-08	0.568418	1	0.243	0.000684459	3	TRPC3
2.05449e-08	3.15897	1	0.35	0.000689034	3	BPGM
2.07099e-08	2.70368	0.7	0.078	0.00069457	3	AL133304.2
2.08029e-08	2.5485	1	0.262	0.000697686	3	TINF2
2.09109e-08	5.11376	1	0.379	0.000701311	3	THRB
2.13328e-08	3.34905	0.9	0.165	0.00071546	3	ZNF560
2.14632e-08	2.53116	0.8	0.117	0.000719832	3	ZNF793-AS1
2.14632e-08	2.15019	0.8	0.117	0.000719832	3	AC097487.1
2.16576e-08	3.91845	1	0.32	0.000726353	3	ERO1B
2.1679e-08	5.44937	1	0.388	0.000727071	3	TMED8
2.19097e-08	4.31195	1	0.33	0.000734809	3	C3orf14
2.19097e-08	3.5617	1	0.33	0.000734809	3	TRMT1L
2.1937e-08	5.77057	1	0.35	0.000735724	3	AC005144.1
2.1937e-08	5.17477	1	0.35	0.000735724	3	RIMKLA
2.20874e-08	3.37719	0.8	0.126	0.000740769	3	PABPN1L
2.21102e-08	3.7357	1	0.301	0.000741531	3	HSPA14
2.22256e-08	3.35102	1	0.252	0.000745403	3	FAM111B
2.2303e-08	3.77523	1	0.379	0.000748	3	SYNJ1
2.23171e-08	7.84614	1	0.437	0.000748471	3	GDF9
2.2695e-08	4.61938	0.9	0.223	0.000761146	3	C5orf58
2.28108e-08	3.16197	1	0.369	0.000765028	3	C5orf34
2.28371e-08	1.93111	1	0.291	0.00076591	3	SUV39H2
2.29619e-08	3.20136	1	0.233	0.000770097	3	TESC
2.32896e-08	5.73749	1	0.417	0.000781086	3	USP45
2.36126e-08	2.38793	0.9	0.175	0.000791919	3	FBXL22
2.39209e-08	3.64315	1	0.262	0.000802258	3	CDCA7L
2.40093e-08	1.43894	0.9	0.155	0.000805223	3	EXO5
2.42213e-08	3.13644	0.8	0.107	0.000812334	3	PLA2G12B
2.42213e-08	2.08093	0.8	0.107	0.000812334	3	AC008637.1
2.43337e-08	4.1193	1	0.369	0.000816103	3	IQCA1
2.44179e-08	1.23496	1	0.214	0.000818929	3	RAB27B
2.4445e-08	3.30331	1	0.291	0.000819836	3	DCLK2
2.46392e-08	4.24018	1	0.388	0.000826348	3	MCTP1
2.47439e-08	5.25478	1	0.359	0.00082986	3	FAM171B
2.47439e-08	3.9277	1	0.359	0.00082986	3	NANOS1
2.47454e-08	3.831	1	0.32	0.000829912	3	SYTL3
2.47454e-08	3.46566	1	0.32	0.000829912	3	TIPARP
2.47454e-08	3.07337	1	0.32	0.000829912	3	DUSP5
2.47581e-08	2.7782	0.9	0.204	0.000830338	3	LINC01989
2.523e-08	2.94693	0.7	0.078	0.000846163	3	PRL
2.523e-08	2.46526	0.7	0.078	0.000846163	3	GTSF1L
2.53077e-08	3.85497	1	0.301	0.000848768	3	PANX1
2.53077e-08	3.7537	1	0.301	0.000848768	3	CLUL1
2.53728e-08	2.70064	0.9	0.194	0.000850951	3	LINC00483
2.56407e-08	3.15964	0.9	0.184	0.000859938	3	AC009518.1
2.56455e-08	2.12409	1	0.262	0.000860099	3	ZNF584
2.59588e-08	4.76704	1	0.408	0.000870606	3	TMEM131L
2.59759e-08	3.81362	1	0.311	0.000871179	3	TESMIN
2.61626e-08	3.79934	1	0.291	0.000877441	3	CHRNA3
2.64012e-08	3.91207	1	0.359	0.000885444	3	CDH17
2.64154e-08	5.91777	1	0.417	0.000885921	3	C15orf53
2.64455e-08	4.39796	1	0.32	0.00088693	3	SNAP91
2.66034e-08	2.9807	0.9	0.146	0.000892225	3	LINC02257
2.66772e-08	1.74546	1	0.194	0.000894699	3	AC007179.2
2.70243e-08	2.67048	0.9	0.165	0.000906339	3	SERTAD3
2.70272e-08	8.10106	1	0.398	0.000906439	3	DCAF4L1
2.72804e-08	1.02214	1	0.272	0.00091493	3	ZNF2
2.73629e-08	4.28483	0.9	0.194	0.000917695	3	PEBP4
2.84793e-08	4.20497	1	0.35	0.000955138	3	PHACTR3
2.85963e-08	5.6766	1	0.456	0.000959063	3	ESCO2
2.86064e-08	3.86615	1	0.34	0.000959403	3	STX2
2.86064e-08	3.82545	1	0.34	0.000959403	3	ADA
2.8827e-08	7.89144	1	0.379	0.0009668	3	ANO5
2.8952e-08	3.09329	1	0.301	0.000970993	3	TAF5L
2.8952e-08	3.08626	1	0.301	0.000970993	3	BHLHE40
2.9094e-08	2.50449	1	0.243	0.000975756	3	SAYSD1
2.94477e-08	5.97292	1	0.408	0.000987615	3	LRRTM4
2.94641e-08	3.1533	1	0.262	0.000988166	3	EBF2
2.94641e-08	2.7453	1	0.262	0.000988166	3	MASTL
2.96851e-08	3.68922	1	0.311	0.00099558	3	BAIAP2L1
2.97497e-08	3.29444	0.9	0.214	0.000997744	3	ZNF684
2.9956e-08	3.91615	1	0.291	0.00100467	3	TLE6
2.9956e-08	2.54905	1	0.291	0.00100467	3	YIPF1
3.04746e-08	3.20675	1	0.33	0.00102206	3	BHLHB9
3.05203e-08	7.62645	1	0.447	0.00102359	3	REC114
3.05203e-08	5.82799	1	0.447	0.00102359	3	ASF1A
3.07487e-08	3.01502	1	0.282	0.00103125	3	RBPMS2
3.15748e-08	2.58091	1	0.262	0.00105896	3	TBCC
3.16102e-08	2.33258	0.9	0.165	0.00106014	3	TUSC1
3.17663e-08	1.63077	1	0.223	0.00106538	3	SQOR
3.18075e-08	3.70838	0.9	0.194	0.00106676	3	VTCN1
3.24305e-08	5.01785	1	0.437	0.00108765	3	AMOT
3.2541e-08	3.66207	1	0.33	0.00109136	3	DSCC1
3.25945e-08	3.64475	1	0.34	0.00109315	3	RNF138
3.29113e-08	1.2863	1	0.282	0.00110378	3	MTMR1
3.35165e-08	3.13902	1	0.272	0.00112408	3	HAS3
3.35544e-08	4.7662	1	0.369	0.00112535	3	TMEM132B
3.38308e-08	2.30514	1	0.252	0.00113462	3	EBAG9
3.38319e-08	2.32128	1	0.262	0.00113465	3	LRRC42
3.38526e-08	2.48019	0.7	0.078	0.00113535	3	LINC02087
3.39344e-08	5.16239	1	0.417	0.00113809	3	NLRP5
3.47858e-08	3.22863	1	0.34	0.00116665	3	DNAJA4
3.48997e-08	4.57655	1	0.379	0.00117047	3	ADAM19
3.52159e-08	1.75403	1	0.233	0.00118107	3	KLF2
3.62452e-08	3.25052	1	0.262	0.00121559	3	SYCP3
3.65928e-08	3.65225	0.8	0.136	0.00122725	3	AL356747.1
3.66577e-08	1.90112	1	0.223	0.00122943	3	TUBD1
3.70592e-08	3.36048	0.9	0.214	0.00124289	3	ZNF232
3.73167e-08	1.27263	0.7	0.078	0.00125153	3	AL121983.2
3.84202e-08	3.06952	1	0.272	0.00128854	3	COMMD8
3.84202e-08	1.99679	1	0.272	0.00128854	3	NEIL3
3.85338e-08	2.73641	1	0.243	0.00129235	3	CALB1
3.86523e-08	3.77766	0.9	0.204	0.00129632	3	PI4K2B
3.86718e-08	1.89909	0.9	0.155	0.00129697	3	FAM110A
3.87068e-08	2.90238	1	0.311	0.00129815	3	HCCS
3.88535e-08	3.43674	1	0.359	0.00130307	3	SHROOM2
3.92087e-08	3.96153	1	0.291	0.00131498	3	HPSE2
3.96193e-08	5.14803	1	0.379	0.00132875	3	UTP15
3.96193e-08	4.71023	1	0.379	0.00132875	3	ERC2
4.04322e-08	3.50871	1	0.301	0.00135602	3	ACE2
4.05734e-08	2.22878	1	0.214	0.00136075	3	HSPA1B
4.05734e-08	1.80675	1	0.214	0.00136075	3	MND1
4.08972e-08	5.15968	1	0.417	0.00137161	3	MTERF3
4.11262e-08	4.00471	1	0.272	0.00137929	3	SAMD3
4.13397e-08	0.945352	1	0.204	0.00138645	3	ARL4D
4.15141e-08	5.65973	1	0.447	0.0013923	3	UCHL1
4.16072e-08	3.13129	0.9	0.204	0.00139542	3	LIN9
4.19998e-08	5.24615	1	0.398	0.00140859	3	FBXW12
4.22056e-08	3.84834	1	0.379	0.00141549	3	NFXL1
4.28667e-08	4.67056	1	0.408	0.00143766	3	ARHGEF26
4.2984e-08	2.52948	0.7	0.087	0.0014416	3	PRR16
4.31081e-08	1.32578	0.9	0.146	0.00144576	3	EID2
4.32934e-08	5.00462	1	0.369	0.00145198	3	LRMP
4.3602e-08	4.53376	0.8	0.126	0.00146233	3	LINC01823
4.40166e-08	3.04275	1	0.272	0.00147623	3	SLC9A3R1
4.50693e-08	3.08254	1	0.34	0.00151153	3	FIGNL1
4.61272e-08	3.68144	1	0.369	0.00154701	3	CRYZ
4.61355e-08	3.35032	1	0.282	0.00154729	3	FNTB
4.68132e-08	1.47016	0.8	0.117	0.00157002	3	HRASLS
4.7055e-08	3.77765	1	0.359	0.00157813	3	TMEM163
4.72029e-08	2.50725	0.9	0.175	0.00158309	3	AL353597.1
4.75861e-08	4.41223	1	0.398	0.00159594	3	KIT
4.77106e-08	3.85838	1	0.35	0.00160012	3	ARHGEF33
4.78216e-08	5.37391	0.9	0.262	0.00160384	3	TRIM6
4.80687e-08	2.71391	1	0.34	0.00161213	3	PLCL1
4.81325e-08	6.59135	1	0.505	0.00161427	3	ERBB4
4.91405e-08	2.11707	1	0.369	0.00164807	3	ZNF571
4.93241e-08	3.41855	1	0.301	0.00165423	3	FBXO33
4.93875e-08	3.44534	1	0.388	0.00165636	3	NAALAD2
4.95998e-08	4.66123	1	0.456	0.00166348	3	LINC02240
4.98616e-08	5.70014	1	0.447	0.00167226	3	ZP3
5.00854e-08	2.54568	1	0.233	0.00167977	3	HRH2
5.03189e-08	3.59319	0.9	0.223	0.00168759	3	DUS4L
5.03638e-08	2.42573	1	0.311	0.0016891	3	MACC1
5.05543e-08	1.34363	0.9	0.146	0.00169549	3	PGPEP1L
5.0643e-08	4.03084	1	0.398	0.00169847	3	CCDC146
5.08605e-08	3.48171	1	0.35	0.00170576	3	STX6
5.10283e-08	3.57639	1	0.32	0.00171139	3	LMO4
5.13233e-08	3.52565	1	0.33	0.00172128	3	NEDD1
5.16372e-08	4.21807	1	0.408	0.00173181	3	AKTIP
5.21806e-08	5.86796	1	0.466	0.00175003	3	NLRP4
5.23441e-08	3.77454	1	0.369	0.00175552	3	FBXO5
5.23667e-08	3.55027	1	0.417	0.00175627	3	DBF4
5.26889e-08	2.49363	1	0.301	0.00176708	3	GCC1
5.35458e-08	1.10834	0.8	0.107	0.00179582	3	ZGLP1
5.36372e-08	5.99585	1	0.485	0.00179888	3	ESRP1
5.37167e-08	2.03296	1	0.233	0.00180155	3	AC016205.1
5.39193e-08	2.94272	1	0.272	0.00180834	3	PUS7
5.45684e-08	1.21142	1	0.243	0.00183012	3	SRSF12
5.46375e-08	2.31407	1	0.262	0.00183243	3	BVES
5.48665e-08	1.29732	1	0.252	0.00184011	3	MAP7D2
[truncated: 923 more rows]
