# Supplementary material for: Single-Cell Transcriptomics Analysis of Human Small Antral Follicles
Source: Int J Mol Sci. 2021 Nov 4;22(21):11955. doi: 10.3390/ijms222111955 (PMC8584910; doi:10.3390/ijms222111955)
Supplement: Supplementary file 1 [file ijms-22-11955-s001.zip › Table S2. GOterms oocytes GOGVMII.xlsx]

## Sheet: GO.GOterm2
ID	Description	GeneRatio	BgRatio	pvalue	p.adjust	qvalue	geneID	Count	name	group
GO:0032535	regulation of cellular component size	30/540	370/18862	3.33303615890651e-07	0.00146920233884599	0.0012507656743686	829	30	CAPZA1	GO
GO:0032535	regulation of cellular component size	30/540	370/18862	3.33303615890651e-07	0.00146920233884599	0.0012507656743686	6558	30	SLC12A2	GO
GO:0032535	regulation of cellular component size	30/540	370/18862	3.33303615890651e-07	0.00146920233884599	0.0012507656743686	9530	30	BAG4	GO
GO:0032535	regulation of cellular component size	30/540	370/18862	3.33303615890651e-07	0.00146920233884599	0.0012507656743686	5728	30	PTEN	GO
GO:0032535	regulation of cellular component size	30/540	370/18862	3.33303615890651e-07	0.00146920233884599	0.0012507656743686	253260	30	RICTOR	GO
GO:0032535	regulation of cellular component size	30/540	370/18862	3.33303615890651e-07	0.00146920233884599	0.0012507656743686	2258	30	FGF13	GO
GO:0032535	regulation of cellular component size	30/540	370/18862	3.33303615890651e-07	0.00146920233884599	0.0012507656743686	382	30	ARF6	GO
GO:0032535	regulation of cellular component size	30/540	370/18862	3.33303615890651e-07	0.00146920233884599	0.0012507656743686	5962	30	RDX	GO
GO:0032535	regulation of cellular component size	30/540	370/18862	3.33303615890651e-07	0.00146920233884599	0.0012507656743686	128239	30	IQGAP3	GO
GO:0032535	regulation of cellular component size	30/540	370/18862	3.33303615890651e-07	0.00146920233884599	0.0012507656743686	23108	30	RAP1GAP2	GO
GO:0032535	regulation of cellular component size	30/540	370/18862	3.33303615890651e-07	0.00146920233884599	0.0012507656743686	10163	30	WASF2	GO
GO:0032535	regulation of cellular component size	30/540	370/18862	3.33303615890651e-07	0.00146920233884599	0.0012507656743686	7430	30	EZR	GO
GO:0032535	regulation of cellular component size	30/540	370/18862	3.33303615890651e-07	0.00146920233884599	0.0012507656743686	55604	30	CARMIL1	GO
GO:0032535	regulation of cellular component size	30/540	370/18862	3.33303615890651e-07	0.00146920233884599	0.0012507656743686	1739	30	DLG1	GO
GO:0032535	regulation of cellular component size	30/540	370/18862	3.33303615890651e-07	0.00146920233884599	0.0012507656743686	6049	30	RNF6	GO
GO:0032535	regulation of cellular component size	30/540	370/18862	3.33303615890651e-07	0.00146920233884599	0.0012507656743686	2241	30	FER	GO
GO:0032535	regulation of cellular component size	30/540	370/18862	3.33303615890651e-07	0.00146920233884599	0.0012507656743686	1808	30	DPYSL2	GO
GO:0032535	regulation of cellular component size	30/540	370/18862	3.33303615890651e-07	0.00146920233884599	0.0012507656743686	10093	30	ARPC4	GO
GO:0032535	regulation of cellular component size	30/540	370/18862	3.33303615890651e-07	0.00146920233884599	0.0012507656743686	23011	30	RAB21	GO
GO:0032535	regulation of cellular component size	30/540	370/18862	3.33303615890651e-07	0.00146920233884599	0.0012507656743686	2017	30	CTTN	GO
GO:0032535	regulation of cellular component size	30/540	370/18862	3.33303615890651e-07	0.00146920233884599	0.0012507656743686	4131	30	MAP1B	GO
GO:0032535	regulation of cellular component size	30/540	370/18862	3.33303615890651e-07	0.00146920233884599	0.0012507656743686	10507	30	SEMA4D	GO
GO:0032535	regulation of cellular component size	30/540	370/18862	3.33303615890651e-07	0.00146920233884599	0.0012507656743686	830	30	CAPZA2	GO
GO:0032535	regulation of cellular component size	30/540	370/18862	3.33303615890651e-07	0.00146920233884599	0.0012507656743686	2885	30	GRB2	GO
GO:0032535	regulation of cellular component size	30/540	370/18862	3.33303615890651e-07	0.00146920233884599	0.0012507656743686	56203	30	LMOD3	GO
GO:0032535	regulation of cellular component size	30/540	370/18862	3.33303615890651e-07	0.00146920233884599	0.0012507656743686	4641	30	MYO1C	GO
GO:0032535	regulation of cellular component size	30/540	370/18862	3.33303615890651e-07	0.00146920233884599	0.0012507656743686	55435	30	AP1AR	GO
GO:0032535	regulation of cellular component size	30/540	370/18862	3.33303615890651e-07	0.00146920233884599	0.0012507656743686	7474	30	WNT5A	GO
GO:0032535	regulation of cellular component size	30/540	370/18862	3.33303615890651e-07	0.00146920233884599	0.0012507656743686	23111	30	SPART	GO
GO:0032535	regulation of cellular component size	30/540	370/18862	3.33303615890651e-07	0.00146920233884599	0.0012507656743686	91663	30	MYADM	GO
GO:0009896	positive regulation of catabolic process	32/540	450/18862	2.4126898824142e-06	0.00452434420443702	0.00385167807068917	1452	32	CSNK1A1	GO
GO:0009896	positive regulation of catabolic process	32/540	450/18862	2.4126898824142e-06	0.00452434420443702	0.00385167807068917	5728	32	PTEN	GO
GO:0009896	positive regulation of catabolic process	32/540	450/18862	2.4126898824142e-06	0.00452434420443702	0.00385167807068917	9554	32	SEC22B	GO
GO:0009896	positive regulation of catabolic process	32/540	450/18862	2.4126898824142e-06	0.00452434420443702	0.00385167807068917	5208	32	PFKFB2	GO
GO:0009896	positive regulation of catabolic process	32/540	450/18862	2.4126898824142e-06	0.00452434420443702	0.00385167807068917	23435	32	TARDBP	GO
GO:0009896	positive regulation of catabolic process	32/540	450/18862	2.4126898824142e-06	0.00452434420443702	0.00385167807068917	580	32	BARD1	GO
GO:0009896	positive regulation of catabolic process	32/540	450/18862	2.4126898824142e-06	0.00452434420443702	0.00385167807068917	2332	32	FMR1	GO
GO:0009896	positive regulation of catabolic process	32/540	450/18862	2.4126898824142e-06	0.00452434420443702	0.00385167807068917	160418	32	TMTC3	GO
GO:0009896	positive regulation of catabolic process	32/540	450/18862	2.4126898824142e-06	0.00452434420443702	0.00385167807068917	5962	32	RDX	GO
GO:0009896	positive regulation of catabolic process	32/540	450/18862	2.4126898824142e-06	0.00452434420443702	0.00385167807068917	55294	32	FBXW7	GO
GO:0009896	positive regulation of catabolic process	32/540	450/18862	2.4126898824142e-06	0.00452434420443702	0.00385167807068917	255488	32	RNF144B	GO
GO:0009896	positive regulation of catabolic process	32/540	450/18862	2.4126898824142e-06	0.00452434420443702	0.00385167807068917	143686	32	SESN3	GO
GO:0009896	positive regulation of catabolic process	32/540	450/18862	2.4126898824142e-06	0.00452434420443702	0.00385167807068917	201163	32	FLCN	GO
GO:0009896	positive regulation of catabolic process	32/540	450/18862	2.4126898824142e-06	0.00452434420443702	0.00385167807068917	7430	32	EZR	GO
GO:0009896	positive regulation of catabolic process	32/540	450/18862	2.4126898824142e-06	0.00452434420443702	0.00385167807068917	1457	32	CSNK2A1	GO
GO:0009896	positive regulation of catabolic process	32/540	450/18862	2.4126898824142e-06	0.00452434420443702	0.00385167807068917	6737	32	TRIM21	GO
GO:0009896	positive regulation of catabolic process	32/540	450/18862	2.4126898824142e-06	0.00452434420443702	0.00385167807068917	5305	32	PIP4K2A	GO
GO:0009896	positive regulation of catabolic process	32/540	450/18862	2.4126898824142e-06	0.00452434420443702	0.00385167807068917	2822	32	GPLD1	GO
GO:0009896	positive regulation of catabolic process	32/540	450/18862	2.4126898824142e-06	0.00452434420443702	0.00385167807068917	10140	32	TOB1	GO
GO:0009896	positive regulation of catabolic process	32/540	450/18862	2.4126898824142e-06	0.00452434420443702	0.00385167807068917	201292	32	TRIM65	GO
GO:0009896	positive regulation of catabolic process	32/540	450/18862	2.4126898824142e-06	0.00452434420443702	0.00385167807068917	3643	32	INSR	GO
GO:0009896	positive regulation of catabolic process	32/540	450/18862	2.4126898824142e-06	0.00452434420443702	0.00385167807068917	678	32	ZFP36L2	GO
GO:0009896	positive regulation of catabolic process	32/540	450/18862	2.4126898824142e-06	0.00452434420443702	0.00385167807068917	405	32	ARNT	GO
GO:0009896	positive regulation of catabolic process	32/540	450/18862	2.4126898824142e-06	0.00452434420443702	0.00385167807068917	11040	32	PIM2	GO
GO:0009896	positive regulation of catabolic process	32/540	450/18862	2.4126898824142e-06	0.00452434420443702	0.00385167807068917	23411	32	SIRT1	GO
GO:0009896	positive regulation of catabolic process	32/540	450/18862	2.4126898824142e-06	0.00452434420443702	0.00385167807068917	29978	32	UBQLN2	GO
GO:0009896	positive regulation of catabolic process	32/540	450/18862	2.4126898824142e-06	0.00452434420443702	0.00385167807068917	10475	32	TRIM38	GO
GO:0009896	positive regulation of catabolic process	32/540	450/18862	2.4126898824142e-06	0.00452434420443702	0.00385167807068917	79443	32	FYCO1	GO
GO:0009896	positive regulation of catabolic process	32/540	450/18862	2.4126898824142e-06	0.00452434420443702	0.00385167807068917	220441	32	RNF152	GO
GO:0009896	positive regulation of catabolic process	32/540	450/18862	2.4126898824142e-06	0.00452434420443702	0.00385167807068917	7474	32	WNT5A	GO
GO:0009896	positive regulation of catabolic process	32/540	450/18862	2.4126898824142e-06	0.00452434420443702	0.00385167807068917	9532	32	BAG2	GO
GO:0009896	positive regulation of catabolic process	32/540	450/18862	2.4126898824142e-06	0.00452434420443702	0.00385167807068917	152503	32	SH3D19	GO
GO:0030838	positive regulation of actin filament polymerization	13/540	97/18862	3.8902212520261e-06	0.00452434420443702	0.00385167807068917	9530	13	BAG4	GO
GO:0030838	positive regulation of actin filament polymerization	13/540	97/18862	3.8902212520261e-06	0.00452434420443702	0.00385167807068917	253260	13	RICTOR	GO
GO:0030838	positive regulation of actin filament polymerization	13/540	97/18862	3.8902212520261e-06	0.00452434420443702	0.00385167807068917	382	13	ARF6	GO
GO:0030838	positive regulation of actin filament polymerization	13/540	97/18862	3.8902212520261e-06	0.00452434420443702	0.00385167807068917	10163	13	WASF2	GO
GO:0030838	positive regulation of actin filament polymerization	13/540	97/18862	3.8902212520261e-06	0.00452434420443702	0.00385167807068917	55604	13	CARMIL1	GO
GO:0030838	positive regulation of actin filament polymerization	13/540	97/18862	3.8902212520261e-06	0.00452434420443702	0.00385167807068917	1739	13	DLG1	GO
GO:0030838	positive regulation of actin filament polymerization	13/540	97/18862	3.8902212520261e-06	0.00452434420443702	0.00385167807068917	2241	13	FER	GO
GO:0030838	positive regulation of actin filament polymerization	13/540	97/18862	3.8902212520261e-06	0.00452434420443702	0.00385167807068917	10093	13	ARPC4	GO
GO:0030838	positive regulation of actin filament polymerization	13/540	97/18862	3.8902212520261e-06	0.00452434420443702	0.00385167807068917	2017	13	CTTN	GO
GO:0030838	positive regulation of actin filament polymerization	13/540	97/18862	3.8902212520261e-06	0.00452434420443702	0.00385167807068917	2885	13	GRB2	GO
GO:0030838	positive regulation of actin filament polymerization	13/540	97/18862	3.8902212520261e-06	0.00452434420443702	0.00385167807068917	56203	13	LMOD3	GO
GO:0030838	positive regulation of actin filament polymerization	13/540	97/18862	3.8902212520261e-06	0.00452434420443702	0.00385167807068917	4641	13	MYO1C	GO
GO:0030838	positive regulation of actin filament polymerization	13/540	97/18862	3.8902212520261e-06	0.00452434420443702	0.00385167807068917	55435	13	AP1AR	GO
GO:0032273	positive regulation of protein polymerization	15/540	132/18862	5.79965623592584e-06	0.00452434420443702	0.00385167807068917	9530	15	BAG4	GO
GO:0032273	positive regulation of protein polymerization	15/540	132/18862	5.79965623592584e-06	0.00452434420443702	0.00385167807068917	253260	15	RICTOR	GO
GO:0032273	positive regulation of protein polymerization	15/540	132/18862	5.79965623592584e-06	0.00452434420443702	0.00385167807068917	382	15	ARF6	GO
GO:0032273	positive regulation of protein polymerization	15/540	132/18862	5.79965623592584e-06	0.00452434420443702	0.00385167807068917	10163	15	WASF2	GO
GO:0032273	positive regulation of protein polymerization	15/540	132/18862	5.79965623592584e-06	0.00452434420443702	0.00385167807068917	55604	15	CARMIL1	GO
GO:0032273	positive regulation of protein polymerization	15/540	132/18862	5.79965623592584e-06	0.00452434420443702	0.00385167807068917	1739	15	DLG1	GO
GO:0032273	positive regulation of protein polymerization	15/540	132/18862	5.79965623592584e-06	0.00452434420443702	0.00385167807068917	2241	15	FER	GO
GO:0032273	positive regulation of protein polymerization	15/540	132/18862	5.79965623592584e-06	0.00452434420443702	0.00385167807068917	10093	15	ARPC4	GO
GO:0032273	positive regulation of protein polymerization	15/540	132/18862	5.79965623592584e-06	0.00452434420443702	0.00385167807068917	2017	15	CTTN	GO
GO:0032273	positive regulation of protein polymerization	15/540	132/18862	5.79965623592584e-06	0.00452434420443702	0.00385167807068917	4131	15	MAP1B	GO
GO:0032273	positive regulation of protein polymerization	15/540	132/18862	5.79965623592584e-06	0.00452434420443702	0.00385167807068917	1639	15	DCTN1	GO
GO:0032273	positive regulation of protein polymerization	15/540	132/18862	5.79965623592584e-06	0.00452434420443702	0.00385167807068917	2885	15	GRB2	GO
GO:0032273	positive regulation of protein polymerization	15/540	132/18862	5.79965623592584e-06	0.00452434420443702	0.00385167807068917	56203	15	LMOD3	GO
GO:0032273	positive regulation of protein polymerization	15/540	132/18862	5.79965623592584e-06	0.00452434420443702	0.00385167807068917	4641	15	MYO1C	GO
GO:0032273	positive regulation of protein polymerization	15/540	132/18862	5.79965623592584e-06	0.00452434420443702	0.00385167807068917	55435	15	AP1AR	GO
GO:1902905	positive regulation of supramolecular fiber organization	19/540	203/18862	6.34905882298273e-06	0.00452434420443702	0.00385167807068917	9530	19	BAG4	GO
GO:1902905	positive regulation of supramolecular fiber organization	19/540	203/18862	6.34905882298273e-06	0.00452434420443702	0.00385167807068917	253260	19	RICTOR	GO
GO:1902905	positive regulation of supramolecular fiber organization	19/540	203/18862	6.34905882298273e-06	0.00452434420443702	0.00385167807068917	7046	19	TGFBR1	GO
GO:1902905	positive regulation of supramolecular fiber organization	19/540	203/18862	6.34905882298273e-06	0.00452434420443702	0.00385167807068917	382	19	ARF6	GO
GO:1902905	positive regulation of supramolecular fiber organization	19/540	203/18862	6.34905882298273e-06	0.00452434420443702	0.00385167807068917	10163	19	WASF2	GO
GO:1902905	positive regulation of supramolecular fiber organization	19/540	203/18862	6.34905882298273e-06	0.00452434420443702	0.00385167807068917	55604	19	CARMIL1	GO
GO:1902905	positive regulation of supramolecular fiber organization	19/540	203/18862	6.34905882298273e-06	0.00452434420443702	0.00385167807068917	1739	19	DLG1	GO
GO:1902905	positive regulation of supramolecular fiber organization	19/540	203/18862	6.34905882298273e-06	0.00452434420443702	0.00385167807068917	4088	19	SMAD3	GO
GO:1902905	positive regulation of supramolecular fiber organization	19/540	203/18862	6.34905882298273e-06	0.00452434420443702	0.00385167807068917	961	19	CD47	GO
GO:1902905	positive regulation of supramolecular fiber organization	19/540	203/18862	6.34905882298273e-06	0.00452434420443702	0.00385167807068917	2241	19	FER	GO
GO:1902905	positive regulation of supramolecular fiber organization	19/540	203/18862	6.34905882298273e-06	0.00452434420443702	0.00385167807068917	10093	19	ARPC4	GO
GO:1902905	positive regulation of supramolecular fiber organization	19/540	203/18862	6.34905882298273e-06	0.00452434420443702	0.00385167807068917	79709	19	COLGALT1	GO
GO:1902905	positive regulation of supramolecular fiber organization	19/540	203/18862	6.34905882298273e-06	0.00452434420443702	0.00385167807068917	2017	19	CTTN	GO
GO:1902905	positive regulation of supramolecular fiber organization	19/540	203/18862	6.34905882298273e-06	0.00452434420443702	0.00385167807068917	4131	19	MAP1B	GO
GO:1902905	positive regulation of supramolecular fiber organization	19/540	203/18862	6.34905882298273e-06	0.00452434420443702	0.00385167807068917	1639	19	DCTN1	GO
GO:1902905	positive regulation of supramolecular fiber organization	19/540	203/18862	6.34905882298273e-06	0.00452434420443702	0.00385167807068917	2885	19	GRB2	GO
GO:1902905	positive regulation of supramolecular fiber organization	19/540	203/18862	6.34905882298273e-06	0.00452434420443702	0.00385167807068917	56203	19	LMOD3	GO
GO:1902905	positive regulation of supramolecular fiber organization	19/540	203/18862	6.34905882298273e-06	0.00452434420443702	0.00385167807068917	4641	19	MYO1C	GO
GO:1902905	positive regulation of supramolecular fiber organization	19/540	203/18862	6.34905882298273e-06	0.00452434420443702	0.00385167807068917	55435	19	AP1AR	GO
GO:0031331	positive regulation of cellular catabolic process	28/540	384/18862	6.44412552132971e-06	0.00452434420443702	0.00385167807068917	1452	28	CSNK1A1	GO
GO:0031331	positive regulation of cellular catabolic process	28/540	384/18862	6.44412552132971e-06	0.00452434420443702	0.00385167807068917	5728	28	PTEN	GO
GO:0031331	positive regulation of cellular catabolic process	28/540	384/18862	6.44412552132971e-06	0.00452434420443702	0.00385167807068917	5208	28	PFKFB2	GO
GO:0031331	positive regulation of cellular catabolic process	28/540	384/18862	6.44412552132971e-06	0.00452434420443702	0.00385167807068917	23435	28	TARDBP	GO
GO:0031331	positive regulation of cellular catabolic process	28/540	384/18862	6.44412552132971e-06	0.00452434420443702	0.00385167807068917	2332	28	FMR1	GO
GO:0031331	positive regulation of cellular catabolic process	28/540	384/18862	6.44412552132971e-06	0.00452434420443702	0.00385167807068917	160418	28	TMTC3	GO
GO:0031331	positive regulation of cellular catabolic process	28/540	384/18862	6.44412552132971e-06	0.00452434420443702	0.00385167807068917	5962	28	RDX	GO
GO:0031331	positive regulation of cellular catabolic process	28/540	384/18862	6.44412552132971e-06	0.00452434420443702	0.00385167807068917	55294	28	FBXW7	GO
GO:0031331	positive regulation of cellular catabolic process	28/540	384/18862	6.44412552132971e-06	0.00452434420443702	0.00385167807068917	255488	28	RNF144B	GO
GO:0031331	positive regulation of cellular catabolic process	28/540	384/18862	6.44412552132971e-06	0.00452434420443702	0.00385167807068917	143686	28	SESN3	GO
GO:0031331	positive regulation of cellular catabolic process	28/540	384/18862	6.44412552132971e-06	0.00452434420443702	0.00385167807068917	201163	28	FLCN	GO
GO:0031331	positive regulation of cellular catabolic process	28/540	384/18862	6.44412552132971e-06	0.00452434420443702	0.00385167807068917	7430	28	EZR	GO
GO:0031331	positive regulation of cellular catabolic process	28/540	384/18862	6.44412552132971e-06	0.00452434420443702	0.00385167807068917	6737	28	TRIM21	GO
GO:0031331	positive regulation of cellular catabolic process	28/540	384/18862	6.44412552132971e-06	0.00452434420443702	0.00385167807068917	5305	28	PIP4K2A	GO
GO:0031331	positive regulation of cellular catabolic process	28/540	384/18862	6.44412552132971e-06	0.00452434420443702	0.00385167807068917	2822	28	GPLD1	GO
GO:0031331	positive regulation of cellular catabolic process	28/540	384/18862	6.44412552132971e-06	0.00452434420443702	0.00385167807068917	10140	28	TOB1	GO
GO:0031331	positive regulation of cellular catabolic process	28/540	384/18862	6.44412552132971e-06	0.00452434420443702	0.00385167807068917	201292	28	TRIM65	GO
GO:0031331	positive regulation of cellular catabolic process	28/540	384/18862	6.44412552132971e-06	0.00452434420443702	0.00385167807068917	3643	28	INSR	GO
GO:0031331	positive regulation of cellular catabolic process	28/540	384/18862	6.44412552132971e-06	0.00452434420443702	0.00385167807068917	678	28	ZFP36L2	GO
GO:0031331	positive regulation of cellular catabolic process	28/540	384/18862	6.44412552132971e-06	0.00452434420443702	0.00385167807068917	405	28	ARNT	GO
GO:0031331	positive regulation of cellular catabolic process	28/540	384/18862	6.44412552132971e-06	0.00452434420443702	0.00385167807068917	11040	28	PIM2	GO
GO:0031331	positive regulation of cellular catabolic process	28/540	384/18862	6.44412552132971e-06	0.00452434420443702	0.00385167807068917	23411	28	SIRT1	GO
GO:0031331	positive regulation of cellular catabolic process	28/540	384/18862	6.44412552132971e-06	0.00452434420443702	0.00385167807068917	29978	28	UBQLN2	GO
GO:0031331	positive regulation of cellular catabolic process	28/540	384/18862	6.44412552132971e-06	0.00452434420443702	0.00385167807068917	10475	28	TRIM38	GO
GO:0031331	positive regulation of cellular catabolic process	28/540	384/18862	6.44412552132971e-06	0.00452434420443702	0.00385167807068917	79443	28	FYCO1	GO
GO:0031331	positive regulation of cellular catabolic process	28/540	384/18862	6.44412552132971e-06	0.00452434420443702	0.00385167807068917	220441	28	RNF152	GO
GO:0031331	positive regulation of cellular catabolic process	28/540	384/18862	6.44412552132971e-06	0.00452434420443702	0.00385167807068917	9532	28	BAG2	GO
GO:0031331	positive regulation of cellular catabolic process	28/540	384/18862	6.44412552132971e-06	0.00452434420443702	0.00385167807068917	152503	28	SH3D19	GO
GO:0030833	regulation of actin filament polymerization	17/540	169/18862	7.46044485390693e-06	0.00452434420443702	0.00385167807068917	829	17	CAPZA1	GO
GO:0030833	regulation of actin filament polymerization	17/540	169/18862	7.46044485390693e-06	0.00452434420443702	0.00385167807068917	9530	17	BAG4	GO
GO:0030833	regulation of actin filament polymerization	17/540	169/18862	7.46044485390693e-06	0.00452434420443702	0.00385167807068917	253260	17	RICTOR	GO
GO:0030833	regulation of actin filament polymerization	17/540	169/18862	7.46044485390693e-06	0.00452434420443702	0.00385167807068917	382	17	ARF6	GO
GO:0030833	regulation of actin filament polymerization	17/540	169/18862	7.46044485390693e-06	0.00452434420443702	0.00385167807068917	5962	17	RDX	GO
GO:0030833	regulation of actin filament polymerization	17/540	169/18862	7.46044485390693e-06	0.00452434420443702	0.00385167807068917	10163	17	WASF2	GO
GO:0030833	regulation of actin filament polymerization	17/540	169/18862	7.46044485390693e-06	0.00452434420443702	0.00385167807068917	55604	17	CARMIL1	GO
GO:0030833	regulation of actin filament polymerization	17/540	169/18862	7.46044485390693e-06	0.00452434420443702	0.00385167807068917	1739	17	DLG1	GO
GO:0030833	regulation of actin filament polymerization	17/540	169/18862	7.46044485390693e-06	0.00452434420443702	0.00385167807068917	2241	17	FER	GO
GO:0030833	regulation of actin filament polymerization	17/540	169/18862	7.46044485390693e-06	0.00452434420443702	0.00385167807068917	10093	17	ARPC4	GO
GO:0030833	regulation of actin filament polymerization	17/540	169/18862	7.46044485390693e-06	0.00452434420443702	0.00385167807068917	2017	17	CTTN	GO
GO:0030833	regulation of actin filament polymerization	17/540	169/18862	7.46044485390693e-06	0.00452434420443702	0.00385167807068917	830	17	CAPZA2	GO
GO:0030833	regulation of actin filament polymerization	17/540	169/18862	7.46044485390693e-06	0.00452434420443702	0.00385167807068917	2885	17	GRB2	GO
GO:0030833	regulation of actin filament polymerization	17/540	169/18862	7.46044485390693e-06	0.00452434420443702	0.00385167807068917	56203	17	LMOD3	GO
GO:0030833	regulation of actin filament polymerization	17/540	169/18862	7.46044485390693e-06	0.00452434420443702	0.00385167807068917	4641	17	MYO1C	GO
GO:0030833	regulation of actin filament polymerization	17/540	169/18862	7.46044485390693e-06	0.00452434420443702	0.00385167807068917	55435	17	AP1AR	GO
GO:0030833	regulation of actin filament polymerization	17/540	169/18862	7.46044485390693e-06	0.00452434420443702	0.00385167807068917	91663	17	MYADM	GO
GO:0032970	regulation of actin filament-based process	28/540	389/18862	8.21115100623779e-06	0.00452434420443702	0.00385167807068917	829	28	CAPZA1	GO
GO:0032970	regulation of actin filament-based process	28/540	389/18862	8.21115100623779e-06	0.00452434420443702	0.00385167807068917	9530	28	BAG4	GO
GO:0032970	regulation of actin filament-based process	28/540	389/18862	8.21115100623779e-06	0.00452434420443702	0.00385167807068917	253260	28	RICTOR	GO
GO:0032970	regulation of actin filament-based process	28/540	389/18862	8.21115100623779e-06	0.00452434420443702	0.00385167807068917	7046	28	TGFBR1	GO
GO:0032970	regulation of actin filament-based process	28/540	389/18862	8.21115100623779e-06	0.00452434420443702	0.00385167807068917	5154	28	PDGFA	GO
GO:0032970	regulation of actin filament-based process	28/540	389/18862	8.21115100623779e-06	0.00452434420443702	0.00385167807068917	2258	28	FGF13	GO
GO:0032970	regulation of actin filament-based process	28/540	389/18862	8.21115100623779e-06	0.00452434420443702	0.00385167807068917	382	28	ARF6	GO
GO:0032970	regulation of actin filament-based process	28/540	389/18862	8.21115100623779e-06	0.00452434420443702	0.00385167807068917	5962	28	RDX	GO
GO:0032970	regulation of actin filament-based process	28/540	389/18862	8.21115100623779e-06	0.00452434420443702	0.00385167807068917	128239	28	IQGAP3	GO
GO:0032970	regulation of actin filament-based process	28/540	389/18862	8.21115100623779e-06	0.00452434420443702	0.00385167807068917	10163	28	WASF2	GO
GO:0032970	regulation of actin filament-based process	28/540	389/18862	8.21115100623779e-06	0.00452434420443702	0.00385167807068917	1946	28	EFNA5	GO
GO:0032970	regulation of actin filament-based process	28/540	389/18862	8.21115100623779e-06	0.00452434420443702	0.00385167807068917	55604	28	CARMIL1	GO
GO:0032970	regulation of actin filament-based process	28/540	389/18862	8.21115100623779e-06	0.00452434420443702	0.00385167807068917	1739	28	DLG1	GO
GO:0032970	regulation of actin filament-based process	28/540	389/18862	8.21115100623779e-06	0.00452434420443702	0.00385167807068917	4088	28	SMAD3	GO
GO:0032970	regulation of actin filament-based process	28/540	389/18862	8.21115100623779e-06	0.00452434420443702	0.00385167807068917	7082	28	TJP1	GO
GO:0032970	regulation of actin filament-based process	28/540	389/18862	8.21115100623779e-06	0.00452434420443702	0.00385167807068917	961	28	CD47	GO
GO:0032970	regulation of actin filament-based process	28/540	389/18862	8.21115100623779e-06	0.00452434420443702	0.00385167807068917	6262	28	RYR2	GO
GO:0032970	regulation of actin filament-based process	28/540	389/18862	8.21115100623779e-06	0.00452434420443702	0.00385167807068917	2241	28	FER	GO
GO:0032970	regulation of actin filament-based process	28/540	389/18862	8.21115100623779e-06	0.00452434420443702	0.00385167807068917	10093	28	ARPC4	GO
GO:0032970	regulation of actin filament-based process	28/540	389/18862	8.21115100623779e-06	0.00452434420443702	0.00385167807068917	2017	28	CTTN	GO
GO:0032970	regulation of actin filament-based process	28/540	389/18862	8.21115100623779e-06	0.00452434420443702	0.00385167807068917	830	28	CAPZA2	GO
GO:0032970	regulation of actin filament-based process	28/540	389/18862	8.21115100623779e-06	0.00452434420443702	0.00385167807068917	23433	28	RHOQ	GO
GO:0032970	regulation of actin filament-based process	28/540	389/18862	8.21115100623779e-06	0.00452434420443702	0.00385167807068917	2885	28	GRB2	GO
GO:0032970	regulation of actin filament-based process	28/540	389/18862	8.21115100623779e-06	0.00452434420443702	0.00385167807068917	56203	28	LMOD3	GO
GO:0032970	regulation of actin filament-based process	28/540	389/18862	8.21115100623779e-06	0.00452434420443702	0.00385167807068917	6331	28	SCN5A	GO
GO:0032970	regulation of actin filament-based process	28/540	389/18862	8.21115100623779e-06	0.00452434420443702	0.00385167807068917	4641	28	MYO1C	GO
GO:0032970	regulation of actin filament-based process	28/540	389/18862	8.21115100623779e-06	0.00452434420443702	0.00385167807068917	55435	28	AP1AR	GO
GO:0032970	regulation of actin filament-based process	28/540	389/18862	8.21115100623779e-06	0.00452434420443702	0.00385167807068917	91663	28	MYADM	GO
GO:0090066	regulation of anatomical structure size	32/540	493/18862	1.571993813665e-05	0.0076992763673726	0.00655457069674356	829	32	CAPZA1	GO
GO:0090066	regulation of anatomical structure size	32/540	493/18862	1.571993813665e-05	0.0076992763673726	0.00655457069674356	6558	32	SLC12A2	GO
GO:0090066	regulation of anatomical structure size	32/540	493/18862	1.571993813665e-05	0.0076992763673726	0.00655457069674356	9530	32	BAG4	GO
GO:0090066	regulation of anatomical structure size	32/540	493/18862	1.571993813665e-05	0.0076992763673726	0.00655457069674356	5728	32	PTEN	GO
GO:0090066	regulation of anatomical structure size	32/540	493/18862	1.571993813665e-05	0.0076992763673726	0.00655457069674356	80005	32	DOCK5	GO
GO:0090066	regulation of anatomical structure size	32/540	493/18862	1.571993813665e-05	0.0076992763673726	0.00655457069674356	253260	32	RICTOR	GO
GO:0090066	regulation of anatomical structure size	32/540	493/18862	1.571993813665e-05	0.0076992763673726	0.00655457069674356	2258	32	FGF13	GO
GO:0090066	regulation of anatomical structure size	32/540	493/18862	1.571993813665e-05	0.0076992763673726	0.00655457069674356	382	32	ARF6	GO
GO:0090066	regulation of anatomical structure size	32/540	493/18862	1.571993813665e-05	0.0076992763673726	0.00655457069674356	5962	32	RDX	GO
GO:0090066	regulation of anatomical structure size	32/540	493/18862	1.571993813665e-05	0.0076992763673726	0.00655457069674356	128239	32	IQGAP3	GO
GO:0090066	regulation of anatomical structure size	32/540	493/18862	1.571993813665e-05	0.0076992763673726	0.00655457069674356	23108	32	RAP1GAP2	GO
GO:0090066	regulation of anatomical structure size	32/540	493/18862	1.571993813665e-05	0.0076992763673726	0.00655457069674356	5910	32	RAP1GDS1	GO
GO:0090066	regulation of anatomical structure size	32/540	493/18862	1.571993813665e-05	0.0076992763673726	0.00655457069674356	10163	32	WASF2	GO
GO:0090066	regulation of anatomical structure size	32/540	493/18862	1.571993813665e-05	0.0076992763673726	0.00655457069674356	7430	32	EZR	GO
GO:0090066	regulation of anatomical structure size	32/540	493/18862	1.571993813665e-05	0.0076992763673726	0.00655457069674356	55604	32	CARMIL1	GO
GO:0090066	regulation of anatomical structure size	32/540	493/18862	1.571993813665e-05	0.0076992763673726	0.00655457069674356	1739	32	DLG1	GO
GO:0090066	regulation of anatomical structure size	32/540	493/18862	1.571993813665e-05	0.0076992763673726	0.00655457069674356	6049	32	RNF6	GO
GO:0090066	regulation of anatomical structure size	32/540	493/18862	1.571993813665e-05	0.0076992763673726	0.00655457069674356	2241	32	FER	GO
GO:0090066	regulation of anatomical structure size	32/540	493/18862	1.571993813665e-05	0.0076992763673726	0.00655457069674356	1808	32	DPYSL2	GO
GO:0090066	regulation of anatomical structure size	32/540	493/18862	1.571993813665e-05	0.0076992763673726	0.00655457069674356	10093	32	ARPC4	GO
GO:0090066	regulation of anatomical structure size	32/540	493/18862	1.571993813665e-05	0.0076992763673726	0.00655457069674356	23011	32	RAB21	GO
GO:0090066	regulation of anatomical structure size	32/540	493/18862	1.571993813665e-05	0.0076992763673726	0.00655457069674356	2017	32	CTTN	GO
GO:0090066	regulation of anatomical structure size	32/540	493/18862	1.571993813665e-05	0.0076992763673726	0.00655457069674356	4131	32	MAP1B	GO
GO:0090066	regulation of anatomical structure size	32/540	493/18862	1.571993813665e-05	0.0076992763673726	0.00655457069674356	10507	32	SEMA4D	GO
GO:0090066	regulation of anatomical structure size	32/540	493/18862	1.571993813665e-05	0.0076992763673726	0.00655457069674356	830	32	CAPZA2	GO
GO:0090066	regulation of anatomical structure size	32/540	493/18862	1.571993813665e-05	0.0076992763673726	0.00655457069674356	2885	32	GRB2	GO
GO:0090066	regulation of anatomical structure size	32/540	493/18862	1.571993813665e-05	0.0076992763673726	0.00655457069674356	56203	32	LMOD3	GO
GO:0090066	regulation of anatomical structure size	32/540	493/18862	1.571993813665e-05	0.0076992763673726	0.00655457069674356	4641	32	MYO1C	GO
GO:0090066	regulation of anatomical structure size	32/540	493/18862	1.571993813665e-05	0.0076992763673726	0.00655457069674356	55435	32	AP1AR	GO
GO:0090066	regulation of anatomical structure size	32/540	493/18862	1.571993813665e-05	0.0076992763673726	0.00655457069674356	7474	32	WNT5A	GO
GO:0090066	regulation of anatomical structure size	32/540	493/18862	1.571993813665e-05	0.0076992763673726	0.00655457069674356	23111	32	SPART	GO
GO:0090066	regulation of anatomical structure size	32/540	493/18862	1.571993813665e-05	0.0076992763673726	0.00655457069674356	91663	32	MYADM	GO
GO:0008064	regulation of actin polymerization or depolymerization	17/540	185/18862	2.45445131422092e-05	0.00893802927963338	0.00760914948464347	829	17	CAPZA1	GO
GO:0008064	regulation of actin polymerization or depolymerization	17/540	185/18862	2.45445131422092e-05	0.00893802927963338	0.00760914948464347	9530	17	BAG4	GO
GO:0008064	regulation of actin polymerization or depolymerization	17/540	185/18862	2.45445131422092e-05	0.00893802927963338	0.00760914948464347	253260	17	RICTOR	GO
GO:0008064	regulation of actin polymerization or depolymerization	17/540	185/18862	2.45445131422092e-05	0.00893802927963338	0.00760914948464347	382	17	ARF6	GO
GO:0008064	regulation of actin polymerization or depolymerization	17/540	185/18862	2.45445131422092e-05	0.00893802927963338	0.00760914948464347	5962	17	RDX	GO
GO:0008064	regulation of actin polymerization or depolymerization	17/540	185/18862	2.45445131422092e-05	0.00893802927963338	0.00760914948464347	10163	17	WASF2	GO
GO:0008064	regulation of actin polymerization or depolymerization	17/540	185/18862	2.45445131422092e-05	0.00893802927963338	0.00760914948464347	55604	17	CARMIL1	GO
GO:0008064	regulation of actin polymerization or depolymerization	17/540	185/18862	2.45445131422092e-05	0.00893802927963338	0.00760914948464347	1739	17	DLG1	GO
GO:0008064	regulation of actin polymerization or depolymerization	17/540	185/18862	2.45445131422092e-05	0.00893802927963338	0.00760914948464347	2241	17	FER	GO
GO:0008064	regulation of actin polymerization or depolymerization	17/540	185/18862	2.45445131422092e-05	0.00893802927963338	0.00760914948464347	10093	17	ARPC4	GO
GO:0008064	regulation of actin polymerization or depolymerization	17/540	185/18862	2.45445131422092e-05	0.00893802927963338	0.00760914948464347	2017	17	CTTN	GO
GO:0008064	regulation of actin polymerization or depolymerization	17/540	185/18862	2.45445131422092e-05	0.00893802927963338	0.00760914948464347	830	17	CAPZA2	GO
GO:0008064	regulation of actin polymerization or depolymerization	17/540	185/18862	2.45445131422092e-05	0.00893802927963338	0.00760914948464347	2885	17	GRB2	GO
GO:0008064	regulation of actin polymerization or depolymerization	17/540	185/18862	2.45445131422092e-05	0.00893802927963338	0.00760914948464347	56203	17	LMOD3	GO
GO:0008064	regulation of actin polymerization or depolymerization	17/540	185/18862	2.45445131422092e-05	0.00893802927963338	0.00760914948464347	4641	17	MYO1C	GO
GO:0008064	regulation of actin polymerization or depolymerization	17/540	185/18862	2.45445131422092e-05	0.00893802927963338	0.00760914948464347	55435	17	AP1AR	GO
GO:0008064	regulation of actin polymerization or depolymerization	17/540	185/18862	2.45445131422092e-05	0.00893802927963338	0.00760914948464347	91663	17	MYADM	GO
GO:0030832	regulation of actin filament length	17/540	186/18862	2.63122101961098e-05	0.00893802927963338	0.00760914948464347	829	17	CAPZA1	GO
GO:0030832	regulation of actin filament length	17/540	186/18862	2.63122101961098e-05	0.00893802927963338	0.00760914948464347	9530	17	BAG4	GO
GO:0030832	regulation of actin filament length	17/540	186/18862	2.63122101961098e-05	0.00893802927963338	0.00760914948464347	253260	17	RICTOR	GO
GO:0030832	regulation of actin filament length	17/540	186/18862	2.63122101961098e-05	0.00893802927963338	0.00760914948464347	382	17	ARF6	GO
GO:0030832	regulation of actin filament length	17/540	186/18862	2.63122101961098e-05	0.00893802927963338	0.00760914948464347	5962	17	RDX	GO
GO:0030832	regulation of actin filament length	17/540	186/18862	2.63122101961098e-05	0.00893802927963338	0.00760914948464347	10163	17	WASF2	GO
GO:0030832	regulation of actin filament length	17/540	186/18862	2.63122101961098e-05	0.00893802927963338	0.00760914948464347	55604	17	CARMIL1	GO
GO:0030832	regulation of actin filament length	17/540	186/18862	2.63122101961098e-05	0.00893802927963338	0.00760914948464347	1739	17	DLG1	GO
GO:0030832	regulation of actin filament length	17/540	186/18862	2.63122101961098e-05	0.00893802927963338	0.00760914948464347	2241	17	FER	GO
GO:0030832	regulation of actin filament length	17/540	186/18862	2.63122101961098e-05	0.00893802927963338	0.00760914948464347	10093	17	ARPC4	GO
GO:0030832	regulation of actin filament length	17/540	186/18862	2.63122101961098e-05	0.00893802927963338	0.00760914948464347	2017	17	CTTN	GO
GO:0030832	regulation of actin filament length	17/540	186/18862	2.63122101961098e-05	0.00893802927963338	0.00760914948464347	830	17	CAPZA2	GO
GO:0030832	regulation of actin filament length	17/540	186/18862	2.63122101961098e-05	0.00893802927963338	0.00760914948464347	2885	17	GRB2	GO
GO:0030832	regulation of actin filament length	17/540	186/18862	2.63122101961098e-05	0.00893802927963338	0.00760914948464347	56203	17	LMOD3	GO
GO:0030832	regulation of actin filament length	17/540	186/18862	2.63122101961098e-05	0.00893802927963338	0.00760914948464347	4641	17	MYO1C	GO
GO:0030832	regulation of actin filament length	17/540	186/18862	2.63122101961098e-05	0.00893802927963338	0.00760914948464347	55435	17	AP1AR	GO
GO:0030832	regulation of actin filament length	17/540	186/18862	2.63122101961098e-05	0.00893802927963338	0.00760914948464347	91663	17	MYADM	GO
GO:0032271	regulation of protein polymerization	19/540	225/18862	2.73731809625447e-05	0.00893802927963338	0.00760914948464347	829	19	CAPZA1	GO
GO:0032271	regulation of protein polymerization	19/540	225/18862	2.73731809625447e-05	0.00893802927963338	0.00760914948464347	9530	19	BAG4	GO
GO:0032271	regulation of protein polymerization	19/540	225/18862	2.73731809625447e-05	0.00893802927963338	0.00760914948464347	253260	19	RICTOR	GO
GO:0032271	regulation of protein polymerization	19/540	225/18862	2.73731809625447e-05	0.00893802927963338	0.00760914948464347	382	19	ARF6	GO
GO:0032271	regulation of protein polymerization	19/540	225/18862	2.73731809625447e-05	0.00893802927963338	0.00760914948464347	5962	19	RDX	GO
GO:0032271	regulation of protein polymerization	19/540	225/18862	2.73731809625447e-05	0.00893802927963338	0.00760914948464347	10163	19	WASF2	GO
GO:0032271	regulation of protein polymerization	19/540	225/18862	2.73731809625447e-05	0.00893802927963338	0.00760914948464347	55604	19	CARMIL1	GO
GO:0032271	regulation of protein polymerization	19/540	225/18862	2.73731809625447e-05	0.00893802927963338	0.00760914948464347	1739	19	DLG1	GO
GO:0032271	regulation of protein polymerization	19/540	225/18862	2.73731809625447e-05	0.00893802927963338	0.00760914948464347	2241	19	FER	GO
GO:0032271	regulation of protein polymerization	19/540	225/18862	2.73731809625447e-05	0.00893802927963338	0.00760914948464347	10093	19	ARPC4	GO
GO:0032271	regulation of protein polymerization	19/540	225/18862	2.73731809625447e-05	0.00893802927963338	0.00760914948464347	2017	19	CTTN	GO
GO:0032271	regulation of protein polymerization	19/540	225/18862	2.73731809625447e-05	0.00893802927963338	0.00760914948464347	4131	19	MAP1B	GO
GO:0032271	regulation of protein polymerization	19/540	225/18862	2.73731809625447e-05	0.00893802927963338	0.00760914948464347	830	19	CAPZA2	GO
GO:0032271	regulation of protein polymerization	19/540	225/18862	2.73731809625447e-05	0.00893802927963338	0.00760914948464347	1639	19	DCTN1	GO
GO:0032271	regulation of protein polymerization	19/540	225/18862	2.73731809625447e-05	0.00893802927963338	0.00760914948464347	2885	19	GRB2	GO
GO:0032271	regulation of protein polymerization	19/540	225/18862	2.73731809625447e-05	0.00893802927963338	0.00760914948464347	56203	19	LMOD3	GO
GO:0032271	regulation of protein polymerization	19/540	225/18862	2.73731809625447e-05	0.00893802927963338	0.00760914948464347	4641	19	MYO1C	GO
GO:0032271	regulation of protein polymerization	19/540	225/18862	2.73731809625447e-05	0.00893802927963338	0.00760914948464347	55435	19	AP1AR	GO
GO:0032271	regulation of protein polymerization	19/540	225/18862	2.73731809625447e-05	0.00893802927963338	0.00760914948464347	91663	19	MYADM	GO
GO:0030041	actin filament polymerization	17/540	188/18862	3.01903487285923e-05	0.00893802927963338	0.00760914948464347	829	17	CAPZA1	GO
GO:0030041	actin filament polymerization	17/540	188/18862	3.01903487285923e-05	0.00893802927963338	0.00760914948464347	9530	17	BAG4	GO
GO:0030041	actin filament polymerization	17/540	188/18862	3.01903487285923e-05	0.00893802927963338	0.00760914948464347	253260	17	RICTOR	GO
GO:0030041	actin filament polymerization	17/540	188/18862	3.01903487285923e-05	0.00893802927963338	0.00760914948464347	382	17	ARF6	GO
GO:0030041	actin filament polymerization	17/540	188/18862	3.01903487285923e-05	0.00893802927963338	0.00760914948464347	5962	17	RDX	GO
GO:0030041	actin filament polymerization	17/540	188/18862	3.01903487285923e-05	0.00893802927963338	0.00760914948464347	10163	17	WASF2	GO
GO:0030041	actin filament polymerization	17/540	188/18862	3.01903487285923e-05	0.00893802927963338	0.00760914948464347	55604	17	CARMIL1	GO
GO:0030041	actin filament polymerization	17/540	188/18862	3.01903487285923e-05	0.00893802927963338	0.00760914948464347	1739	17	DLG1	GO
GO:0030041	actin filament polymerization	17/540	188/18862	3.01903487285923e-05	0.00893802927963338	0.00760914948464347	2241	17	FER	GO
GO:0030041	actin filament polymerization	17/540	188/18862	3.01903487285923e-05	0.00893802927963338	0.00760914948464347	10093	17	ARPC4	GO
GO:0030041	actin filament polymerization	17/540	188/18862	3.01903487285923e-05	0.00893802927963338	0.00760914948464347	2017	17	CTTN	GO
GO:0030041	actin filament polymerization	17/540	188/18862	3.01903487285923e-05	0.00893802927963338	0.00760914948464347	830	17	CAPZA2	GO
GO:0030041	actin filament polymerization	17/540	188/18862	3.01903487285923e-05	0.00893802927963338	0.00760914948464347	2885	17	GRB2	GO
GO:0030041	actin filament polymerization	17/540	188/18862	3.01903487285923e-05	0.00893802927963338	0.00760914948464347	56203	17	LMOD3	GO
GO:0030041	actin filament polymerization	17/540	188/18862	3.01903487285923e-05	0.00893802927963338	0.00760914948464347	4641	17	MYO1C	GO
GO:0030041	actin filament polymerization	17/540	188/18862	3.01903487285923e-05	0.00893802927963338	0.00760914948464347	55435	17	AP1AR	GO
GO:0030041	actin filament polymerization	17/540	188/18862	3.01903487285923e-05	0.00893802927963338	0.00760914948464347	91663	17	MYADM	GO
GO:0032956	regulation of actin cytoskeleton organization	25/540	352/18862	3.11070715435687e-05	0.00893802927963338	0.00760914948464347	829	25	CAPZA1	GO
GO:0032956	regulation of actin cytoskeleton organization	25/540	352/18862	3.11070715435687e-05	0.00893802927963338	0.00760914948464347	9530	25	BAG4	GO
GO:0032956	regulation of actin cytoskeleton organization	25/540	352/18862	3.11070715435687e-05	0.00893802927963338	0.00760914948464347	253260	25	RICTOR	GO
GO:0032956	regulation of actin cytoskeleton organization	25/540	352/18862	3.11070715435687e-05	0.00893802927963338	0.00760914948464347	7046	25	TGFBR1	GO
GO:0032956	regulation of actin cytoskeleton organization	25/540	352/18862	3.11070715435687e-05	0.00893802927963338	0.00760914948464347	5154	25	PDGFA	GO
GO:0032956	regulation of actin cytoskeleton organization	25/540	352/18862	3.11070715435687e-05	0.00893802927963338	0.00760914948464347	382	25	ARF6	GO
GO:0032956	regulation of actin cytoskeleton organization	25/540	352/18862	3.11070715435687e-05	0.00893802927963338	0.00760914948464347	5962	25	RDX	GO
GO:0032956	regulation of actin cytoskeleton organization	25/540	352/18862	3.11070715435687e-05	0.00893802927963338	0.00760914948464347	128239	25	IQGAP3	GO
GO:0032956	regulation of actin cytoskeleton organization	25/540	352/18862	3.11070715435687e-05	0.00893802927963338	0.00760914948464347	10163	25	WASF2	GO
GO:0032956	regulation of actin cytoskeleton organization	25/540	352/18862	3.11070715435687e-05	0.00893802927963338	0.00760914948464347	1946	25	EFNA5	GO
GO:0032956	regulation of actin cytoskeleton organization	25/540	352/18862	3.11070715435687e-05	0.00893802927963338	0.00760914948464347	55604	25	CARMIL1	GO
GO:0032956	regulation of actin cytoskeleton organization	25/540	352/18862	3.11070715435687e-05	0.00893802927963338	0.00760914948464347	1739	25	DLG1	GO
GO:0032956	regulation of actin cytoskeleton organization	25/540	352/18862	3.11070715435687e-05	0.00893802927963338	0.00760914948464347	4088	25	SMAD3	GO
GO:0032956	regulation of actin cytoskeleton organization	25/540	352/18862	3.11070715435687e-05	0.00893802927963338	0.00760914948464347	7082	25	TJP1	GO
GO:0032956	regulation of actin cytoskeleton organization	25/540	352/18862	3.11070715435687e-05	0.00893802927963338	0.00760914948464347	961	25	CD47	GO
GO:0032956	regulation of actin cytoskeleton organization	25/540	352/18862	3.11070715435687e-05	0.00893802927963338	0.00760914948464347	2241	25	FER	GO
GO:0032956	regulation of actin cytoskeleton organization	25/540	352/18862	3.11070715435687e-05	0.00893802927963338	0.00760914948464347	10093	25	ARPC4	GO
GO:0032956	regulation of actin cytoskeleton organization	25/540	352/18862	3.11070715435687e-05	0.00893802927963338	0.00760914948464347	2017	25	CTTN	GO
GO:0032956	regulation of actin cytoskeleton organization	25/540	352/18862	3.11070715435687e-05	0.00893802927963338	0.00760914948464347	830	25	CAPZA2	GO
GO:0032956	regulation of actin cytoskeleton organization	25/540	352/18862	3.11070715435687e-05	0.00893802927963338	0.00760914948464347	23433	25	RHOQ	GO
GO:0032956	regulation of actin cytoskeleton organization	25/540	352/18862	3.11070715435687e-05	0.00893802927963338	0.00760914948464347	2885	25	GRB2	GO
GO:0032956	regulation of actin cytoskeleton organization	25/540	352/18862	3.11070715435687e-05	0.00893802927963338	0.00760914948464347	56203	25	LMOD3	GO
GO:0032956	regulation of actin cytoskeleton organization	25/540	352/18862	3.11070715435687e-05	0.00893802927963338	0.00760914948464347	4641	25	MYO1C	GO
GO:0032956	regulation of actin cytoskeleton organization	25/540	352/18862	3.11070715435687e-05	0.00893802927963338	0.00760914948464347	55435	25	AP1AR	GO
GO:0032956	regulation of actin cytoskeleton organization	25/540	352/18862	3.11070715435687e-05	0.00893802927963338	0.00760914948464347	91663	25	MYADM	GO
GO:0050678	regulation of epithelial cell proliferation	26/540	374/18862	3.12502608426567e-05	0.00893802927963338	0.00760914948464347	5728	26	PTEN	GO
GO:0050678	regulation of epithelial cell proliferation	26/540	374/18862	3.12502608426567e-05	0.00893802927963338	0.00760914948464347	11221	26	DUSP10	GO
GO:0050678	regulation of epithelial cell proliferation	26/540	374/18862	3.12502608426567e-05	0.00893802927963338	0.00760914948464347	253260	26	RICTOR	GO
GO:0050678	regulation of epithelial cell proliferation	26/540	374/18862	3.12502608426567e-05	0.00893802927963338	0.00760914948464347	6431	26	SRSF6	GO
GO:0050678	regulation of epithelial cell proliferation	26/540	374/18862	3.12502608426567e-05	0.00893802927963338	0.00760914948464347	6239	26	RREB1	GO
GO:0050678	regulation of epithelial cell proliferation	26/540	374/18862	3.12502608426567e-05	0.00893802927963338	0.00760914948464347	7046	26	TGFBR1	GO
GO:0050678	regulation of epithelial cell proliferation	26/540	374/18862	3.12502608426567e-05	0.00893802927963338	0.00760914948464347	2254	26	FGF9	GO
GO:0050678	regulation of epithelial cell proliferation	26/540	374/18862	3.12502608426567e-05	0.00893802927963338	0.00760914948464347	55294	26	FBXW7	GO
GO:0050678	regulation of epithelial cell proliferation	26/540	374/18862	3.12502608426567e-05	0.00893802927963338	0.00760914948464347	128239	26	IQGAP3	GO
GO:0050678	regulation of epithelial cell proliferation	26/540	374/18862	3.12502608426567e-05	0.00893802927963338	0.00760914948464347	55333	26	SYNJ2BP	GO
GO:0050678	regulation of epithelial cell proliferation	26/540	374/18862	3.12502608426567e-05	0.00893802927963338	0.00760914948464347	5469	26	MED1	GO
GO:0050678	regulation of epithelial cell proliferation	26/540	374/18862	3.12502608426567e-05	0.00893802927963338	0.00760914948464347	4824	26	NKX3-1	GO
GO:0050678	regulation of epithelial cell proliferation	26/540	374/18862	3.12502608426567e-05	0.00893802927963338	0.00760914948464347	1739	26	DLG1	GO
GO:0050678	regulation of epithelial cell proliferation	26/540	374/18862	3.12502608426567e-05	0.00893802927963338	0.00760914948464347	4088	26	SMAD3	GO
GO:0050678	regulation of epithelial cell proliferation	26/540	374/18862	3.12502608426567e-05	0.00893802927963338	0.00760914948464347	83481	26	EPPK1	GO
GO:0050678	regulation of epithelial cell proliferation	26/540	374/18862	3.12502608426567e-05	0.00893802927963338	0.00760914948464347	2683	26	B4GALT1	GO
GO:0050678	regulation of epithelial cell proliferation	26/540	374/18862	3.12502608426567e-05	0.00893802927963338	0.00760914948464347	23512	26	SUZ12	GO
GO:0050678	regulation of epithelial cell proliferation	26/540	374/18862	3.12502608426567e-05	0.00893802927963338	0.00760914948464347	6667	26	SP1	GO
GO:0050678	regulation of epithelial cell proliferation	26/540	374/18862	3.12502608426567e-05	0.00893802927963338	0.00760914948464347	7049	26	TGFBR3	GO
GO:0050678	regulation of epithelial cell proliferation	26/540	374/18862	3.12502608426567e-05	0.00893802927963338	0.00760914948464347	10413	26	YAP1	GO
GO:0050678	regulation of epithelial cell proliferation	26/540	374/18862	3.12502608426567e-05	0.00893802927963338	0.00760914948464347	4781	26	NFIB	GO
GO:0050678	regulation of epithelial cell proliferation	26/540	374/18862	3.12502608426567e-05	0.00893802927963338	0.00760914948464347	405	26	ARNT	GO
GO:0050678	regulation of epithelial cell proliferation	26/540	374/18862	3.12502608426567e-05	0.00893802927963338	0.00760914948464347	23411	26	SIRT1	GO
GO:0050678	regulation of epithelial cell proliferation	26/540	374/18862	3.12502608426567e-05	0.00893802927963338	0.00760914948464347	6331	26	SCN5A	GO
GO:0050678	regulation of epithelial cell proliferation	26/540	374/18862	3.12502608426567e-05	0.00893802927963338	0.00760914948464347	135228	26	CD109	GO
GO:0050678	regulation of epithelial cell proliferation	26/540	374/18862	3.12502608426567e-05	0.00893802927963338	0.00760914948464347	7474	26	WNT5A	GO
GO:0050821	protein stabilization	17/540	191/18862	3.69602874764553e-05	0.00893802927963338	0.00760914948464347	9530	17	BAG4	GO
GO:0050821	protein stabilization	17/540	191/18862	3.69602874764553e-05	0.00893802927963338	0.00760914948464347	5728	17	PTEN	GO
GO:0050821	protein stabilization	17/540	191/18862	3.69602874764553e-05	0.00893802927963338	0.00760914948464347	6400	17	SEL1L	GO
GO:0050821	protein stabilization	17/540	191/18862	3.69602874764553e-05	0.00893802927963338	0.00760914948464347	389856	17	USP27X	GO
GO:0050821	protein stabilization	17/540	191/18862	3.69602874764553e-05	0.00893802927963338	0.00760914948464347	51616	17	TAF9B	GO
GO:0050821	protein stabilization	17/540	191/18862	3.69602874764553e-05	0.00893802927963338	0.00760914948464347	55294	17	FBXW7	GO
GO:0050821	protein stabilization	17/540	191/18862	3.69602874764553e-05	0.00893802927963338	0.00760914948464347	9099	17	USP2	GO
GO:0050821	protein stabilization	17/540	191/18862	3.69602874764553e-05	0.00893802927963338	0.00760914948464347	80155	17	NAA15	GO
GO:0050821	protein stabilization	17/540	191/18862	3.69602874764553e-05	0.00893802927963338	0.00760914948464347	11261	17	CHP1	GO
GO:0050821	protein stabilization	17/540	191/18862	3.69602874764553e-05	0.00893802927963338	0.00760914948464347	4088	17	SMAD3	GO
GO:0050821	protein stabilization	17/540	191/18862	3.69602874764553e-05	0.00893802927963338	0.00760914948464347	6659	17	SOX4	GO
GO:0050821	protein stabilization	17/540	191/18862	3.69602874764553e-05	0.00893802927963338	0.00760914948464347	7157	17	TP53	GO
GO:0050821	protein stabilization	17/540	191/18862	3.69602874764553e-05	0.00893802927963338	0.00760914948464347	23011	17	RAB21	GO
GO:0050821	protein stabilization	17/540	191/18862	3.69602874764553e-05	0.00893802927963338	0.00760914948464347	7203	17	CCT3	GO
GO:0050821	protein stabilization	17/540	191/18862	3.69602874764553e-05	0.00893802927963338	0.00760914948464347	4194	17	MDM4	GO
GO:0050821	protein stabilization	17/540	191/18862	3.69602874764553e-05	0.00893802927963338	0.00760914948464347	11040	17	PIM2	GO
GO:0050821	protein stabilization	17/540	191/18862	3.69602874764553e-05	0.00893802927963338	0.00760914948464347	9532	17	BAG2	GO
GO:0043244	regulation of protein-containing complex disassembly	13/540	120/18862	4.01797248723815e-05	0.00893802927963338	0.00760914948464347	829	13	CAPZA1	GO
GO:0043244	regulation of protein-containing complex disassembly	13/540	120/18862	4.01797248723815e-05	0.00893802927963338	0.00760914948464347	2733	13	GLE1	GO
GO:0043244	regulation of protein-containing complex disassembly	13/540	120/18862	4.01797248723815e-05	0.00893802927963338	0.00760914948464347	2258	13	FGF13	GO
GO:0043244	regulation of protein-containing complex disassembly	13/540	120/18862	4.01797248723815e-05	0.00893802927963338	0.00760914948464347	5962	13	RDX	GO
GO:0043244	regulation of protein-containing complex disassembly	13/540	120/18862	4.01797248723815e-05	0.00893802927963338	0.00760914948464347	3480	13	IGF1R	GO
GO:0043244	regulation of protein-containing complex disassembly	13/540	120/18862	4.01797248723815e-05	0.00893802927963338	0.00760914948464347	55604	13	CARMIL1	GO
GO:0043244	regulation of protein-containing complex disassembly	13/540	120/18862	4.01797248723815e-05	0.00893802927963338	0.00760914948464347	9711	13	RUBCN	GO
GO:0043244	regulation of protein-containing complex disassembly	13/540	120/18862	4.01797248723815e-05	0.00893802927963338	0.00760914948464347	56893	13	UBQLN4	GO
GO:0043244	regulation of protein-containing complex disassembly	13/540	120/18862	4.01797248723815e-05	0.00893802927963338	0.00760914948464347	4131	13	MAP1B	GO
GO:0043244	regulation of protein-containing complex disassembly	13/540	120/18862	4.01797248723815e-05	0.00893802927963338	0.00760914948464347	3643	13	INSR	GO
GO:0043244	regulation of protein-containing complex disassembly	13/540	120/18862	4.01797248723815e-05	0.00893802927963338	0.00760914948464347	830	13	CAPZA2	GO
GO:0043244	regulation of protein-containing complex disassembly	13/540	120/18862	4.01797248723815e-05	0.00893802927963338	0.00760914948464347	56203	13	LMOD3	GO
GO:0043244	regulation of protein-containing complex disassembly	13/540	120/18862	4.01797248723815e-05	0.00893802927963338	0.00760914948464347	79443	13	FYCO1	GO
GO:0043491	protein kinase B signaling	21/540	273/18862	4.22437485254631e-05	0.00893802927963338	0.00760914948464347	9530	21	BAG4	GO
GO:0043491	protein kinase B signaling	21/540	273/18862	4.22437485254631e-05	0.00893802927963338	0.00760914948464347	5728	21	PTEN	GO
GO:0043491	protein kinase B signaling	21/540	273/18862	4.22437485254631e-05	0.00893802927963338	0.00760914948464347	253260	21	RICTOR	GO
GO:0043491	protein kinase B signaling	21/540	273/18862	4.22437485254631e-05	0.00893802927963338	0.00760914948464347	7046	21	TGFBR1	GO
GO:0043491	protein kinase B signaling	21/540	273/18862	4.22437485254631e-05	0.00893802927963338	0.00760914948464347	5154	21	PDGFA	GO
GO:0043491	protein kinase B signaling	21/540	273/18862	4.22437485254631e-05	0.00893802927963338	0.00760914948464347	2254	21	FGF9	GO
GO:0043491	protein kinase B signaling	21/540	273/18862	4.22437485254631e-05	0.00893802927963338	0.00760914948464347	143686	21	SESN3	GO
GO:0043491	protein kinase B signaling	21/540	273/18862	4.22437485254631e-05	0.00893802927963338	0.00760914948464347	3480	21	IGF1R	GO
GO:0043491	protein kinase B signaling	21/540	273/18862	4.22437485254631e-05	0.00893802927963338	0.00760914948464347	201163	21	FLCN	GO
GO:0043491	protein kinase B signaling	21/540	273/18862	4.22437485254631e-05	0.00893802927963338	0.00760914948464347	4824	21	NKX3-1	GO
GO:0043491	protein kinase B signaling	21/540	273/18862	4.22437485254631e-05	0.00893802927963338	0.00760914948464347	5527	21	PPP2R5C	GO
GO:0043491	protein kinase B signaling	21/540	273/18862	4.22437485254631e-05	0.00893802927963338	0.00760914948464347	84830	21	ADTRP	GO
GO:0043491	protein kinase B signaling	21/540	273/18862	4.22437485254631e-05	0.00893802927963338	0.00760914948464347	1739	21	DLG1	GO
GO:0043491	protein kinase B signaling	21/540	273/18862	4.22437485254631e-05	0.00893802927963338	0.00760914948464347	59338	21	PLEKHA1	GO
GO:0043491	protein kinase B signaling	21/540	273/18862	4.22437485254631e-05	0.00893802927963338	0.00760914948464347	85453	21	TSPYL5	GO
GO:0043491	protein kinase B signaling	21/540	273/18862	4.22437485254631e-05	0.00893802927963338	0.00760914948464347	10019	21	SH2B3	GO
GO:0043491	protein kinase B signaling	21/540	273/18862	4.22437485254631e-05	0.00893802927963338	0.00760914948464347	3643	21	INSR	GO
GO:0043491	protein kinase B signaling	21/540	273/18862	4.22437485254631e-05	0.00893802927963338	0.00760914948464347	10461	21	MERTK	GO
GO:0043491	protein kinase B signaling	21/540	273/18862	4.22437485254631e-05	0.00893802927963338	0.00760914948464347	23035	21	PHLPP2	GO
GO:0043491	protein kinase B signaling	21/540	273/18862	4.22437485254631e-05	0.00893802927963338	0.00760914948464347	2885	21	GRB2	GO
GO:0043491	protein kinase B signaling	21/540	273/18862	4.22437485254631e-05	0.00893802927963338	0.00760914948464347	23411	21	SIRT1	GO
GO:0110053	regulation of actin filament organization	21/540	273/18862	4.22437485254631e-05	0.00893802927963338	0.00760914948464347	829	21	CAPZA1	GO
GO:0110053	regulation of actin filament organization	21/540	273/18862	4.22437485254631e-05	0.00893802927963338	0.00760914948464347	9530	21	BAG4	GO
GO:0110053	regulation of actin filament organization	21/540	273/18862	4.22437485254631e-05	0.00893802927963338	0.00760914948464347	253260	21	RICTOR	GO
GO:0110053	regulation of actin filament organization	21/540	273/18862	4.22437485254631e-05	0.00893802927963338	0.00760914948464347	7046	21	TGFBR1	GO
GO:0110053	regulation of actin filament organization	21/540	273/18862	4.22437485254631e-05	0.00893802927963338	0.00760914948464347	382	21	ARF6	GO
GO:0110053	regulation of actin filament organization	21/540	273/18862	4.22437485254631e-05	0.00893802927963338	0.00760914948464347	5962	21	RDX	GO
GO:0110053	regulation of actin filament organization	21/540	273/18862	4.22437485254631e-05	0.00893802927963338	0.00760914948464347	10163	21	WASF2	GO
GO:0110053	regulation of actin filament organization	21/540	273/18862	4.22437485254631e-05	0.00893802927963338	0.00760914948464347	55604	21	CARMIL1	GO
GO:0110053	regulation of actin filament organization	21/540	273/18862	4.22437485254631e-05	0.00893802927963338	0.00760914948464347	1739	21	DLG1	GO
GO:0110053	regulation of actin filament organization	21/540	273/18862	4.22437485254631e-05	0.00893802927963338	0.00760914948464347	4088	21	SMAD3	GO
GO:0110053	regulation of actin filament organization	21/540	273/18862	4.22437485254631e-05	0.00893802927963338	0.00760914948464347	7082	21	TJP1	GO
GO:0110053	regulation of actin filament organization	21/540	273/18862	4.22437485254631e-05	0.00893802927963338	0.00760914948464347	961	21	CD47	GO
GO:0110053	regulation of actin filament organization	21/540	273/18862	4.22437485254631e-05	0.00893802927963338	0.00760914948464347	2241	21	FER	GO
GO:0110053	regulation of actin filament organization	21/540	273/18862	4.22437485254631e-05	0.00893802927963338	0.00760914948464347	10093	21	ARPC4	GO
GO:0110053	regulation of actin filament organization	21/540	273/18862	4.22437485254631e-05	0.00893802927963338	0.00760914948464347	2017	21	CTTN	GO
GO:0110053	regulation of actin filament organization	21/540	273/18862	4.22437485254631e-05	0.00893802927963338	0.00760914948464347	830	21	CAPZA2	GO
GO:0110053	regulation of actin filament organization	21/540	273/18862	4.22437485254631e-05	0.00893802927963338	0.00760914948464347	2885	21	GRB2	GO
GO:0110053	regulation of actin filament organization	21/540	273/18862	4.22437485254631e-05	0.00893802927963338	0.00760914948464347	56203	21	LMOD3	GO
GO:0110053	regulation of actin filament organization	21/540	273/18862	4.22437485254631e-05	0.00893802927963338	0.00760914948464347	4641	21	MYO1C	GO
GO:0110053	regulation of actin filament organization	21/540	273/18862	4.22437485254631e-05	0.00893802927963338	0.00760914948464347	55435	21	AP1AR	GO
GO:0110053	regulation of actin filament organization	21/540	273/18862	4.22437485254631e-05	0.00893802927963338	0.00760914948464347	91663	21	MYADM	GO
GO:0051258	protein polymerization	22/540	294/18862	4.23937979744432e-05	0.00893802927963338	0.00760914948464347	829	22	CAPZA1	GO
GO:0051258	protein polymerization	22/540	294/18862	4.23937979744432e-05	0.00893802927963338	0.00760914948464347	9530	22	BAG4	GO
GO:0051258	protein polymerization	22/540	294/18862	4.23937979744432e-05	0.00893802927963338	0.00760914948464347	253260	22	RICTOR	GO
GO:0051258	protein polymerization	22/540	294/18862	4.23937979744432e-05	0.00893802927963338	0.00760914948464347	2258	22	FGF13	GO
GO:0051258	protein polymerization	22/540	294/18862	4.23937979744432e-05	0.00893802927963338	0.00760914948464347	382	22	ARF6	GO
GO:0051258	protein polymerization	22/540	294/18862	4.23937979744432e-05	0.00893802927963338	0.00760914948464347	5962	22	RDX	GO
GO:0051258	protein polymerization	22/540	294/18862	4.23937979744432e-05	0.00893802927963338	0.00760914948464347	79649	22	MAP7D3	GO
GO:0051258	protein polymerization	22/540	294/18862	4.23937979744432e-05	0.00893802927963338	0.00760914948464347	10163	22	WASF2	GO
GO:0051258	protein polymerization	22/540	294/18862	4.23937979744432e-05	0.00893802927963338	0.00760914948464347	55604	22	CARMIL1	GO
GO:0051258	protein polymerization	22/540	294/18862	4.23937979744432e-05	0.00893802927963338	0.00760914948464347	1739	22	DLG1	GO
GO:0051258	protein polymerization	22/540	294/18862	4.23937979744432e-05	0.00893802927963338	0.00760914948464347	2241	22	FER	GO
GO:0051258	protein polymerization	22/540	294/18862	4.23937979744432e-05	0.00893802927963338	0.00760914948464347	10093	22	ARPC4	GO
GO:0051258	protein polymerization	22/540	294/18862	4.23937979744432e-05	0.00893802927963338	0.00760914948464347	2017	22	CTTN	GO
GO:0051258	protein polymerization	22/540	294/18862	4.23937979744432e-05	0.00893802927963338	0.00760914948464347	4131	22	MAP1B	GO
GO:0051258	protein polymerization	22/540	294/18862	4.23937979744432e-05	0.00893802927963338	0.00760914948464347	830	22	CAPZA2	GO
GO:0051258	protein polymerization	22/540	294/18862	4.23937979744432e-05	0.00893802927963338	0.00760914948464347	1639	22	DCTN1	GO
GO:0051258	protein polymerization	22/540	294/18862	4.23937979744432e-05	0.00893802927963338	0.00760914948464347	2885	22	GRB2	GO
GO:0051258	protein polymerization	22/540	294/18862	4.23937979744432e-05	0.00893802927963338	0.00760914948464347	85378	22	TUBGCP6	GO
GO:0051258	protein polymerization	22/540	294/18862	4.23937979744432e-05	0.00893802927963338	0.00760914948464347	56203	22	LMOD3	GO
GO:0051258	protein polymerization	22/540	294/18862	4.23937979744432e-05	0.00893802927963338	0.00760914948464347	4641	22	MYO1C	GO
GO:0051258	protein polymerization	22/540	294/18862	4.23937979744432e-05	0.00893802927963338	0.00760914948464347	55435	22	AP1AR	GO
GO:0051258	protein polymerization	22/540	294/18862	4.23937979744432e-05	0.00893802927963338	0.00760914948464347	91663	22	MYADM	GO
GO:0031647	regulation of protein stability	22/540	295/18862	4.46124923297318e-05	0.00893802927963338	0.00760914948464347	9530	22	BAG4	GO
GO:0031647	regulation of protein stability	22/540	295/18862	4.46124923297318e-05	0.00893802927963338	0.00760914948464347	5728	22	PTEN	GO
GO:0031647	regulation of protein stability	22/540	295/18862	4.46124923297318e-05	0.00893802927963338	0.00760914948464347	6400	22	SEL1L	GO
GO:0031647	regulation of protein stability	22/540	295/18862	4.46124923297318e-05	0.00893802927963338	0.00760914948464347	23435	22	TARDBP	GO
GO:0031647	regulation of protein stability	22/540	295/18862	4.46124923297318e-05	0.00893802927963338	0.00760914948464347	389856	22	USP27X	GO
GO:0031647	regulation of protein stability	22/540	295/18862	4.46124923297318e-05	0.00893802927963338	0.00760914948464347	51616	22	TAF9B	GO
GO:0031647	regulation of protein stability	22/540	295/18862	4.46124923297318e-05	0.00893802927963338	0.00760914948464347	55294	22	FBXW7	GO
GO:0031647	regulation of protein stability	22/540	295/18862	4.46124923297318e-05	0.00893802927963338	0.00760914948464347	9099	22	USP2	GO
GO:0031647	regulation of protein stability	22/540	295/18862	4.46124923297318e-05	0.00893802927963338	0.00760914948464347	80155	22	NAA15	GO
GO:0031647	regulation of protein stability	22/540	295/18862	4.46124923297318e-05	0.00893802927963338	0.00760914948464347	11261	22	CHP1	GO
GO:0031647	regulation of protein stability	22/540	295/18862	4.46124923297318e-05	0.00893802927963338	0.00760914948464347	4088	22	SMAD3	GO
GO:0031647	regulation of protein stability	22/540	295/18862	4.46124923297318e-05	0.00893802927963338	0.00760914948464347	6737	22	TRIM21	GO
GO:0031647	regulation of protein stability	22/540	295/18862	4.46124923297318e-05	0.00893802927963338	0.00760914948464347	6659	22	SOX4	GO
GO:0031647	regulation of protein stability	22/540	295/18862	4.46124923297318e-05	0.00893802927963338	0.00760914948464347	730094	22	MOSMO	GO
GO:0031647	regulation of protein stability	22/540	295/18862	4.46124923297318e-05	0.00893802927963338	0.00760914948464347	7157	22	TP53	GO
GO:0031647	regulation of protein stability	22/540	295/18862	4.46124923297318e-05	0.00893802927963338	0.00760914948464347	23011	22	RAB21	GO
GO:0031647	regulation of protein stability	22/540	295/18862	4.46124923297318e-05	0.00893802927963338	0.00760914948464347	7203	22	CCT3	GO
GO:0031647	regulation of protein stability	22/540	295/18862	4.46124923297318e-05	0.00893802927963338	0.00760914948464347	4194	22	MDM4	GO
GO:0031647	regulation of protein stability	22/540	295/18862	4.46124923297318e-05	0.00893802927963338	0.00760914948464347	5594	22	MAPK1	GO
GO:0031647	regulation of protein stability	22/540	295/18862	4.46124923297318e-05	0.00893802927963338	0.00760914948464347	11040	22	PIM2	GO
GO:0031647	regulation of protein stability	22/540	295/18862	4.46124923297318e-05	0.00893802927963338	0.00760914948464347	23411	22	SIRT1	GO
GO:0031647	regulation of protein stability	22/540	295/18862	4.46124923297318e-05	0.00893802927963338	0.00760914948464347	9532	22	BAG2	GO
GO:0050673	epithelial cell proliferation	28/540	428/18862	4.62938073175666e-05	0.00893802927963338	0.00760914948464347	5728	28	PTEN	GO
GO:0050673	epithelial cell proliferation	28/540	428/18862	4.62938073175666e-05	0.00893802927963338	0.00760914948464347	92	28	ACVR2A	GO
GO:0050673	epithelial cell proliferation	28/540	428/18862	4.62938073175666e-05	0.00893802927963338	0.00760914948464347	11221	28	DUSP10	GO
GO:0050673	epithelial cell proliferation	28/540	428/18862	4.62938073175666e-05	0.00893802927963338	0.00760914948464347	253260	28	RICTOR	GO
GO:0050673	epithelial cell proliferation	28/540	428/18862	4.62938073175666e-05	0.00893802927963338	0.00760914948464347	6431	28	SRSF6	GO
GO:0050673	epithelial cell proliferation	28/540	428/18862	4.62938073175666e-05	0.00893802927963338	0.00760914948464347	6239	28	RREB1	GO
GO:0050673	epithelial cell proliferation	28/540	428/18862	4.62938073175666e-05	0.00893802927963338	0.00760914948464347	7046	28	TGFBR1	GO
GO:0050673	epithelial cell proliferation	28/540	428/18862	4.62938073175666e-05	0.00893802927963338	0.00760914948464347	2254	28	FGF9	GO
GO:0050673	epithelial cell proliferation	28/540	428/18862	4.62938073175666e-05	0.00893802927963338	0.00760914948464347	55294	28	FBXW7	GO
GO:0050673	epithelial cell proliferation	28/540	428/18862	4.62938073175666e-05	0.00893802927963338	0.00760914948464347	128239	28	IQGAP3	GO
GO:0050673	epithelial cell proliferation	28/540	428/18862	4.62938073175666e-05	0.00893802927963338	0.00760914948464347	55333	28	SYNJ2BP	GO
GO:0050673	epithelial cell proliferation	28/540	428/18862	4.62938073175666e-05	0.00893802927963338	0.00760914948464347	5469	28	MED1	GO
GO:0050673	epithelial cell proliferation	28/540	428/18862	4.62938073175666e-05	0.00893802927963338	0.00760914948464347	4824	28	NKX3-1	GO
GO:0050673	epithelial cell proliferation	28/540	428/18862	4.62938073175666e-05	0.00893802927963338	0.00760914948464347	1739	28	DLG1	GO
GO:0050673	epithelial cell proliferation	28/540	428/18862	4.62938073175666e-05	0.00893802927963338	0.00760914948464347	4088	28	SMAD3	GO
GO:0050673	epithelial cell proliferation	28/540	428/18862	4.62938073175666e-05	0.00893802927963338	0.00760914948464347	83481	28	EPPK1	GO
GO:0050673	epithelial cell proliferation	28/540	428/18862	4.62938073175666e-05	0.00893802927963338	0.00760914948464347	2683	28	B4GALT1	GO
GO:0050673	epithelial cell proliferation	28/540	428/18862	4.62938073175666e-05	0.00893802927963338	0.00760914948464347	23512	28	SUZ12	GO
GO:0050673	epithelial cell proliferation	28/540	428/18862	4.62938073175666e-05	0.00893802927963338	0.00760914948464347	6667	28	SP1	GO
GO:0050673	epithelial cell proliferation	28/540	428/18862	4.62938073175666e-05	0.00893802927963338	0.00760914948464347	7049	28	TGFBR3	GO
GO:0050673	epithelial cell proliferation	28/540	428/18862	4.62938073175666e-05	0.00893802927963338	0.00760914948464347	10413	28	YAP1	GO
GO:0050673	epithelial cell proliferation	28/540	428/18862	4.62938073175666e-05	0.00893802927963338	0.00760914948464347	4781	28	NFIB	GO
GO:0050673	epithelial cell proliferation	28/540	428/18862	4.62938073175666e-05	0.00893802927963338	0.00760914948464347	405	28	ARNT	GO
GO:0050673	epithelial cell proliferation	28/540	428/18862	4.62938073175666e-05	0.00893802927963338	0.00760914948464347	5594	28	MAPK1	GO
GO:0050673	epithelial cell proliferation	28/540	428/18862	4.62938073175666e-05	0.00893802927963338	0.00760914948464347	23411	28	SIRT1	GO
GO:0050673	epithelial cell proliferation	28/540	428/18862	4.62938073175666e-05	0.00893802927963338	0.00760914948464347	6331	28	SCN5A	GO
GO:0050673	epithelial cell proliferation	28/540	428/18862	4.62938073175666e-05	0.00893802927963338	0.00760914948464347	135228	28	CD109	GO
GO:0050673	epithelial cell proliferation	28/540	428/18862	4.62938073175666e-05	0.00893802927963338	0.00760914948464347	7474	28	WNT5A	GO
GO:0042176	regulation of protein catabolic process	26/540	383/18862	4.66367226478148e-05	0.00893802927963338	0.00760914948464347	1452	26	CSNK1A1	GO
GO:0042176	regulation of protein catabolic process	26/540	383/18862	4.66367226478148e-05	0.00893802927963338	0.00760914948464347	5728	26	PTEN	GO
GO:0042176	regulation of protein catabolic process	26/540	383/18862	4.66367226478148e-05	0.00893802927963338	0.00760914948464347	9554	26	SEC22B	GO
GO:0042176	regulation of protein catabolic process	26/540	383/18862	4.66367226478148e-05	0.00893802927963338	0.00760914948464347	8473	26	OGT	GO
GO:0042176	regulation of protein catabolic process	26/540	383/18862	4.66367226478148e-05	0.00893802927963338	0.00760914948464347	580	26	BARD1	GO
GO:0042176	regulation of protein catabolic process	26/540	383/18862	4.66367226478148e-05	0.00893802927963338	0.00760914948464347	2332	26	FMR1	GO
GO:0042176	regulation of protein catabolic process	26/540	383/18862	4.66367226478148e-05	0.00893802927963338	0.00760914948464347	160418	26	TMTC3	GO
GO:0042176	regulation of protein catabolic process	26/540	383/18862	4.66367226478148e-05	0.00893802927963338	0.00760914948464347	5962	26	RDX	GO
GO:0042176	regulation of protein catabolic process	26/540	383/18862	4.66367226478148e-05	0.00893802927963338	0.00760914948464347	55294	26	FBXW7	GO
GO:0042176	regulation of protein catabolic process	26/540	383/18862	4.66367226478148e-05	0.00893802927963338	0.00760914948464347	255488	26	RNF144B	GO
GO:0042176	regulation of protein catabolic process	26/540	383/18862	4.66367226478148e-05	0.00893802927963338	0.00760914948464347	7430	26	EZR	GO
GO:0042176	regulation of protein catabolic process	26/540	383/18862	4.66367226478148e-05	0.00893802927963338	0.00760914948464347	1457	26	CSNK2A1	GO
GO:0042176	regulation of protein catabolic process	26/540	383/18862	4.66367226478148e-05	0.00893802927963338	0.00760914948464347	4745	26	NELL1	GO
GO:0042176	regulation of protein catabolic process	26/540	383/18862	4.66367226478148e-05	0.00893802927963338	0.00760914948464347	4088	26	SMAD3	GO
GO:0042176	regulation of protein catabolic process	26/540	383/18862	4.66367226478148e-05	0.00893802927963338	0.00760914948464347	5270	26	SERPINE2	GO
GO:0042176	regulation of protein catabolic process	26/540	383/18862	4.66367226478148e-05	0.00893802927963338	0.00760914948464347	5720	26	PSME1	GO
GO:0042176	regulation of protein catabolic process	26/540	383/18862	4.66367226478148e-05	0.00893802927963338	0.00760914948464347	2822	26	GPLD1	GO
GO:0042176	regulation of protein catabolic process	26/540	383/18862	4.66367226478148e-05	0.00893802927963338	0.00760914948464347	56893	26	UBQLN4	GO
GO:0042176	regulation of protein catabolic process	26/540	383/18862	4.66367226478148e-05	0.00893802927963338	0.00760914948464347	5887	26	RAD23B	GO
GO:0042176	regulation of protein catabolic process	26/540	383/18862	4.66367226478148e-05	0.00893802927963338	0.00760914948464347	1459	26	CSNK2A2	GO
GO:0042176	regulation of protein catabolic process	26/540	383/18862	4.66367226478148e-05	0.00893802927963338	0.00760914948464347	4194	26	MDM4	GO
GO:0042176	regulation of protein catabolic process	26/540	383/18862	4.66367226478148e-05	0.00893802927963338	0.00760914948464347	29978	26	UBQLN2	GO
GO:0042176	regulation of protein catabolic process	26/540	383/18862	4.66367226478148e-05	0.00893802927963338	0.00760914948464347	7474	26	WNT5A	GO
GO:0042176	regulation of protein catabolic process	26/540	383/18862	4.66367226478148e-05	0.00893802927963338	0.00760914948464347	9532	26	BAG2	GO
GO:0042176	regulation of protein catabolic process	26/540	383/18862	4.66367226478148e-05	0.00893802927963338	0.00760914948464347	152503	26	SH3D19	GO
GO:0042176	regulation of protein catabolic process	26/540	383/18862	4.66367226478148e-05	0.00893802927963338	0.00760914948464347	2905	26	GRIN2C	GO
GO:0008154	actin polymerization or depolymerization	18/540	215/18862	4.95636380737364e-05	0.00910318819287625	0.00774975305845923	829	18	CAPZA1	GO
GO:0008154	actin polymerization or depolymerization	18/540	215/18862	4.95636380737364e-05	0.00910318819287625	0.00774975305845923	9530	18	BAG4	GO
GO:0008154	actin polymerization or depolymerization	18/540	215/18862	4.95636380737364e-05	0.00910318819287625	0.00774975305845923	253260	18	RICTOR	GO
GO:0008154	actin polymerization or depolymerization	18/540	215/18862	4.95636380737364e-05	0.00910318819287625	0.00774975305845923	382	18	ARF6	GO
GO:0008154	actin polymerization or depolymerization	18/540	215/18862	4.95636380737364e-05	0.00910318819287625	0.00774975305845923	5962	18	RDX	GO
GO:0008154	actin polymerization or depolymerization	18/540	215/18862	4.95636380737364e-05	0.00910318819287625	0.00774975305845923	55740	18	ENAH	GO
GO:0008154	actin polymerization or depolymerization	18/540	215/18862	4.95636380737364e-05	0.00910318819287625	0.00774975305845923	10163	18	WASF2	GO
GO:0008154	actin polymerization or depolymerization	18/540	215/18862	4.95636380737364e-05	0.00910318819287625	0.00774975305845923	55604	18	CARMIL1	GO
GO:0008154	actin polymerization or depolymerization	18/540	215/18862	4.95636380737364e-05	0.00910318819287625	0.00774975305845923	1739	18	DLG1	GO
GO:0008154	actin polymerization or depolymerization	18/540	215/18862	4.95636380737364e-05	0.00910318819287625	0.00774975305845923	2241	18	FER	GO
GO:0008154	actin polymerization or depolymerization	18/540	215/18862	4.95636380737364e-05	0.00910318819287625	0.00774975305845923	10093	18	ARPC4	GO
GO:0008154	actin polymerization or depolymerization	18/540	215/18862	4.95636380737364e-05	0.00910318819287625	0.00774975305845923	2017	18	CTTN	GO
GO:0008154	actin polymerization or depolymerization	18/540	215/18862	4.95636380737364e-05	0.00910318819287625	0.00774975305845923	830	18	CAPZA2	GO
GO:0008154	actin polymerization or depolymerization	18/540	215/18862	4.95636380737364e-05	0.00910318819287625	0.00774975305845923	2885	18	GRB2	GO
GO:0008154	actin polymerization or depolymerization	18/540	215/18862	4.95636380737364e-05	0.00910318819287625	0.00774975305845923	56203	18	LMOD3	GO
GO:0008154	actin polymerization or depolymerization	18/540	215/18862	4.95636380737364e-05	0.00910318819287625	0.00774975305845923	4641	18	MYO1C	GO
GO:0008154	actin polymerization or depolymerization	18/540	215/18862	4.95636380737364e-05	0.00910318819287625	0.00774975305845923	55435	18	AP1AR	GO
GO:0008154	actin polymerization or depolymerization	18/540	215/18862	4.95636380737364e-05	0.00910318819287625	0.00774975305845923	91663	18	MYADM	GO
GO:0043954	cellular component maintenance	9/540	62/18862	6.35093914026675e-05	0.0111979758921183	0.00953309390949515	80856	9	LNPK	GO
GO:0043954	cellular component maintenance	9/540	62/18862	6.35093914026675e-05	0.0111979758921183	0.00953309390949515	382	9	ARF6	GO
GO:0043954	cellular component maintenance	9/540	62/18862	6.35093914026675e-05	0.0111979758921183	0.00953309390949515	3480	9	IGF1R	GO
GO:0043954	cellular component maintenance	9/540	62/18862	6.35093914026675e-05	0.0111979758921183	0.00953309390949515	1739	9	DLG1	GO
GO:0043954	cellular component maintenance	9/540	62/18862	6.35093914026675e-05	0.0111979758921183	0.00953309390949515	7082	9	TJP1	GO
GO:0043954	cellular component maintenance	9/540	62/18862	6.35093914026675e-05	0.0111979758921183	0.00953309390949515	2017	9	CTTN	GO
GO:0043954	cellular component maintenance	9/540	62/18862	6.35093914026675e-05	0.0111979758921183	0.00953309390949515	3643	9	INSR	GO
GO:0043954	cellular component maintenance	9/540	62/18862	6.35093914026675e-05	0.0111979758921183	0.00953309390949515	1639	9	DCTN1	GO
GO:0043954	cellular component maintenance	9/540	62/18862	6.35093914026675e-05	0.0111979758921183	0.00953309390949515	23411	9	SIRT1	GO
GO:0051495	positive regulation of cytoskeleton organization	18/540	220/18862	6.68552006825095e-05	0.0113345278695578	0.00964934374223264	9530	18	BAG4	GO
GO:0051495	positive regulation of cytoskeleton organization	18/540	220/18862	6.68552006825095e-05	0.0113345278695578	0.00964934374223264	253260	18	RICTOR	GO
GO:0051495	positive regulation of cytoskeleton organization	18/540	220/18862	6.68552006825095e-05	0.0113345278695578	0.00964934374223264	7046	18	TGFBR1	GO
GO:0051495	positive regulation of cytoskeleton organization	18/540	220/18862	6.68552006825095e-05	0.0113345278695578	0.00964934374223264	382	18	ARF6	GO
GO:0051495	positive regulation of cytoskeleton organization	18/540	220/18862	6.68552006825095e-05	0.0113345278695578	0.00964934374223264	10163	18	WASF2	GO
GO:0051495	positive regulation of cytoskeleton organization	18/540	220/18862	6.68552006825095e-05	0.0113345278695578	0.00964934374223264	55604	18	CARMIL1	GO
GO:0051495	positive regulation of cytoskeleton organization	18/540	220/18862	6.68552006825095e-05	0.0113345278695578	0.00964934374223264	1739	18	DLG1	GO
GO:0051495	positive regulation of cytoskeleton organization	18/540	220/18862	6.68552006825095e-05	0.0113345278695578	0.00964934374223264	4088	18	SMAD3	GO
GO:0051495	positive regulation of cytoskeleton organization	18/540	220/18862	6.68552006825095e-05	0.0113345278695578	0.00964934374223264	961	18	CD47	GO
GO:0051495	positive regulation of cytoskeleton organization	18/540	220/18862	6.68552006825095e-05	0.0113345278695578	0.00964934374223264	2241	18	FER	GO
GO:0051495	positive regulation of cytoskeleton organization	18/540	220/18862	6.68552006825095e-05	0.0113345278695578	0.00964934374223264	10093	18	ARPC4	GO
GO:0051495	positive regulation of cytoskeleton organization	18/540	220/18862	6.68552006825095e-05	0.0113345278695578	0.00964934374223264	2017	18	CTTN	GO
GO:0051495	positive regulation of cytoskeleton organization	18/540	220/18862	6.68552006825095e-05	0.0113345278695578	0.00964934374223264	4131	18	MAP1B	GO
GO:0051495	positive regulation of cytoskeleton organization	18/540	220/18862	6.68552006825095e-05	0.0113345278695578	0.00964934374223264	1639	18	DCTN1	GO
GO:0051495	positive regulation of cytoskeleton organization	18/540	220/18862	6.68552006825095e-05	0.0113345278695578	0.00964934374223264	2885	18	GRB2	GO
GO:0051495	positive regulation of cytoskeleton organization	18/540	220/18862	6.68552006825095e-05	0.0113345278695578	0.00964934374223264	56203	18	LMOD3	GO
GO:0051495	positive regulation of cytoskeleton organization	18/540	220/18862	6.68552006825095e-05	0.0113345278695578	0.00964934374223264	4641	18	MYO1C	GO
GO:0051495	positive regulation of cytoskeleton organization	18/540	220/18862	6.68552006825095e-05	0.0113345278695578	0.00964934374223264	55435	18	AP1AR	GO
GO:1902903	regulation of supramolecular fiber organization	25/540	370/18862	7.00718412687883e-05	0.0113381876262192	0.00965245937708269	829	25	CAPZA1	GO
GO:1902903	regulation of supramolecular fiber organization	25/540	370/18862	7.00718412687883e-05	0.0113381876262192	0.00965245937708269	9530	25	BAG4	GO
GO:1902903	regulation of supramolecular fiber organization	25/540	370/18862	7.00718412687883e-05	0.0113381876262192	0.00965245937708269	253260	25	RICTOR	GO
GO:1902903	regulation of supramolecular fiber organization	25/540	370/18862	7.00718412687883e-05	0.0113381876262192	0.00965245937708269	7046	25	TGFBR1	GO
GO:1902903	regulation of supramolecular fiber organization	25/540	370/18862	7.00718412687883e-05	0.0113381876262192	0.00965245937708269	2258	25	FGF13	GO
GO:1902903	regulation of supramolecular fiber organization	25/540	370/18862	7.00718412687883e-05	0.0113381876262192	0.00965245937708269	382	25	ARF6	GO
GO:1902903	regulation of supramolecular fiber organization	25/540	370/18862	7.00718412687883e-05	0.0113381876262192	0.00965245937708269	5962	25	RDX	GO
GO:1902903	regulation of supramolecular fiber organization	25/540	370/18862	7.00718412687883e-05	0.0113381876262192	0.00965245937708269	10163	25	WASF2	GO
GO:1902903	regulation of supramolecular fiber organization	25/540	370/18862	7.00718412687883e-05	0.0113381876262192	0.00965245937708269	55604	25	CARMIL1	GO
GO:1902903	regulation of supramolecular fiber organization	25/540	370/18862	7.00718412687883e-05	0.0113381876262192	0.00965245937708269	1739	25	DLG1	GO
GO:1902903	regulation of supramolecular fiber organization	25/540	370/18862	7.00718412687883e-05	0.0113381876262192	0.00965245937708269	4088	25	SMAD3	GO
GO:1902903	regulation of supramolecular fiber organization	25/540	370/18862	7.00718412687883e-05	0.0113381876262192	0.00965245937708269	7082	25	TJP1	GO
GO:1902903	regulation of supramolecular fiber organization	25/540	370/18862	7.00718412687883e-05	0.0113381876262192	0.00965245937708269	961	25	CD47	GO
GO:1902903	regulation of supramolecular fiber organization	25/540	370/18862	7.00718412687883e-05	0.0113381876262192	0.00965245937708269	2241	25	FER	GO
GO:1902903	regulation of supramolecular fiber organization	25/540	370/18862	7.00718412687883e-05	0.0113381876262192	0.00965245937708269	10093	25	ARPC4	GO
GO:1902903	regulation of supramolecular fiber organization	25/540	370/18862	7.00718412687883e-05	0.0113381876262192	0.00965245937708269	79709	25	COLGALT1	GO
GO:1902903	regulation of supramolecular fiber organization	25/540	370/18862	7.00718412687883e-05	0.0113381876262192	0.00965245937708269	2017	25	CTTN	GO
GO:1902903	regulation of supramolecular fiber organization	25/540	370/18862	7.00718412687883e-05	0.0113381876262192	0.00965245937708269	4131	25	MAP1B	GO
GO:1902903	regulation of supramolecular fiber organization	25/540	370/18862	7.00718412687883e-05	0.0113381876262192	0.00965245937708269	830	25	CAPZA2	GO
GO:1902903	regulation of supramolecular fiber organization	25/540	370/18862	7.00718412687883e-05	0.0113381876262192	0.00965245937708269	1639	25	DCTN1	GO
GO:1902903	regulation of supramolecular fiber organization	25/540	370/18862	7.00718412687883e-05	0.0113381876262192	0.00965245937708269	2885	25	GRB2	GO
GO:1902903	regulation of supramolecular fiber organization	25/540	370/18862	7.00718412687883e-05	0.0113381876262192	0.00965245937708269	56203	25	LMOD3	GO
GO:1902903	regulation of supramolecular fiber organization	25/540	370/18862	7.00718412687883e-05	0.0113381876262192	0.00965245937708269	4641	25	MYO1C	GO
GO:1902903	regulation of supramolecular fiber organization	25/540	370/18862	7.00718412687883e-05	0.0113381876262192	0.00965245937708269	55435	25	AP1AR	GO
GO:1902903	regulation of supramolecular fiber organization	25/540	370/18862	7.00718412687883e-05	0.0113381876262192	0.00965245937708269	91663	25	MYADM	GO
GO:0022604	regulation of cell morphogenesis	22/540	305/18862	7.32256186974805e-05	0.0113381876262192	0.00965245937708269	56990	22	CDC42SE2	GO
GO:0022604	regulation of cell morphogenesis	22/540	305/18862	7.32256186974805e-05	0.0113381876262192	0.00965245937708269	80005	22	DOCK5	GO
GO:0022604	regulation of cell morphogenesis	22/540	305/18862	7.32256186974805e-05	0.0113381876262192	0.00965245937708269	80823	22	BHLHB9	GO
GO:0022604	regulation of cell morphogenesis	22/540	305/18862	7.32256186974805e-05	0.0113381876262192	0.00965245937708269	7074	22	TIAM1	GO
GO:0022604	regulation of cell morphogenesis	22/540	305/18862	7.32256186974805e-05	0.0113381876262192	0.00965245937708269	6239	22	RREB1	GO
GO:0022604	regulation of cell morphogenesis	22/540	305/18862	7.32256186974805e-05	0.0113381876262192	0.00965245937708269	9204	22	ZMYM6	GO
GO:0022604	regulation of cell morphogenesis	22/540	305/18862	7.32256186974805e-05	0.0113381876262192	0.00965245937708269	5962	22	RDX	GO
GO:0022604	regulation of cell morphogenesis	22/540	305/18862	7.32256186974805e-05	0.0113381876262192	0.00965245937708269	7430	22	EZR	GO
GO:0022604	regulation of cell morphogenesis	22/540	305/18862	7.32256186974805e-05	0.0113381876262192	0.00965245937708269	1946	22	EFNA5	GO
GO:0022604	regulation of cell morphogenesis	22/540	305/18862	7.32256186974805e-05	0.0113381876262192	0.00965245937708269	55604	22	CARMIL1	GO
GO:0022604	regulation of cell morphogenesis	22/540	305/18862	7.32256186974805e-05	0.0113381876262192	0.00965245937708269	1739	22	DLG1	GO
GO:0022604	regulation of cell morphogenesis	22/540	305/18862	7.32256186974805e-05	0.0113381876262192	0.00965245937708269	23011	22	RAB21	GO
GO:0022604	regulation of cell morphogenesis	22/540	305/18862	7.32256186974805e-05	0.0113381876262192	0.00965245937708269	10507	22	SEMA4D	GO
GO:0022604	regulation of cell morphogenesis	22/540	305/18862	7.32256186974805e-05	0.0113381876262192	0.00965245937708269	118987	22	PDZD8	GO
GO:0022604	regulation of cell morphogenesis	22/540	305/18862	7.32256186974805e-05	0.0113381876262192	0.00965245937708269	23433	22	RHOQ	GO
GO:0022604	regulation of cell morphogenesis	22/540	305/18862	7.32256186974805e-05	0.0113381876262192	0.00965245937708269	2192	22	FBLN1	GO
GO:0022604	regulation of cell morphogenesis	22/540	305/18862	7.32256186974805e-05	0.0113381876262192	0.00965245937708269	4241	22	MELTF	GO
GO:0022604	regulation of cell morphogenesis	22/540	305/18862	7.32256186974805e-05	0.0113381876262192	0.00965245937708269	55435	22	AP1AR	GO
GO:0022604	regulation of cell morphogenesis	22/540	305/18862	7.32256186974805e-05	0.0113381876262192	0.00965245937708269	5361	22	PLXNA1	GO
GO:0022604	regulation of cell morphogenesis	22/540	305/18862	7.32256186974805e-05	0.0113381876262192	0.00965245937708269	7474	22	WNT5A	GO
GO:0022604	regulation of cell morphogenesis	22/540	305/18862	7.32256186974805e-05	0.0113381876262192	0.00965245937708269	152503	22	SH3D19	GO
GO:0022604	regulation of cell morphogenesis	22/540	305/18862	7.32256186974805e-05	0.0113381876262192	0.00965245937708269	91663	22	MYADM	GO
GO:0070373	negative regulation of ERK1 and ERK2 cascade	10/540	78/18862	7.4614601089451e-05	0.0113381876262192	0.00965245937708269	5728	10	PTEN	GO
GO:0070373	negative regulation of ERK1 and ERK2 cascade	10/540	78/18862	7.4614601089451e-05	0.0113381876262192	0.00965245937708269	11221	10	DUSP10	GO
GO:0070373	negative regulation of ERK1 and ERK2 cascade	10/540	78/18862	7.4614601089451e-05	0.0113381876262192	0.00965245937708269	55885	10	LMO3	GO
GO:0070373	negative regulation of ERK1 and ERK2 cascade	10/540	78/18862	7.4614601089451e-05	0.0113381876262192	0.00965245937708269	201163	10	FLCN	GO
GO:0070373	negative regulation of ERK1 and ERK2 cascade	10/540	78/18862	7.4614601089451e-05	0.0113381876262192	0.00965245937708269	55333	10	SYNJ2BP	GO
GO:0070373	negative regulation of ERK1 and ERK2 cascade	10/540	78/18862	7.4614601089451e-05	0.0113381876262192	0.00965245937708269	7430	10	EZR	GO
GO:0070373	negative regulation of ERK1 and ERK2 cascade	10/540	78/18862	7.4614601089451e-05	0.0113381876262192	0.00965245937708269	1739	10	DLG1	GO
GO:0070373	negative regulation of ERK1 and ERK2 cascade	10/540	78/18862	7.4614601089451e-05	0.0113381876262192	0.00965245937708269	2192	10	FBLN1	GO
GO:0070373	negative regulation of ERK1 and ERK2 cascade	10/540	78/18862	7.4614601089451e-05	0.0113381876262192	0.00965245937708269	65268	10	WNK2	GO
GO:0070373	negative regulation of ERK1 and ERK2 cascade	10/540	78/18862	7.4614601089451e-05	0.0113381876262192	0.00965245937708269	1848	10	DUSP6	GO
GO:0010769	regulation of cell morphogenesis involved in differentiation	11/540	94/18862	7.71655237719093e-05	0.0113381876262192	0.00965245937708269	80005	11	DOCK5	GO
GO:0010769	regulation of cell morphogenesis involved in differentiation	11/540	94/18862	7.71655237719093e-05	0.0113381876262192	0.00965245937708269	80823	11	BHLHB9	GO
GO:0010769	regulation of cell morphogenesis involved in differentiation	11/540	94/18862	7.71655237719093e-05	0.0113381876262192	0.00965245937708269	7074	11	TIAM1	GO
GO:0010769	regulation of cell morphogenesis involved in differentiation	11/540	94/18862	7.71655237719093e-05	0.0113381876262192	0.00965245937708269	6239	11	RREB1	GO
GO:0010769	regulation of cell morphogenesis involved in differentiation	11/540	94/18862	7.71655237719093e-05	0.0113381876262192	0.00965245937708269	1946	11	EFNA5	GO
GO:0010769	regulation of cell morphogenesis involved in differentiation	11/540	94/18862	7.71655237719093e-05	0.0113381876262192	0.00965245937708269	55604	11	CARMIL1	GO
GO:0010769	regulation of cell morphogenesis involved in differentiation	11/540	94/18862	7.71655237719093e-05	0.0113381876262192	0.00965245937708269	23011	11	RAB21	GO
GO:0010769	regulation of cell morphogenesis involved in differentiation	11/540	94/18862	7.71655237719093e-05	0.0113381876262192	0.00965245937708269	2192	11	FBLN1	GO
GO:0010769	regulation of cell morphogenesis involved in differentiation	11/540	94/18862	7.71655237719093e-05	0.0113381876262192	0.00965245937708269	4241	11	MELTF	GO
GO:0010769	regulation of cell morphogenesis involved in differentiation	11/540	94/18862	7.71655237719093e-05	0.0113381876262192	0.00965245937708269	55435	11	AP1AR	GO
GO:0010769	regulation of cell morphogenesis involved in differentiation	11/540	94/18862	7.71655237719093e-05	0.0113381876262192	0.00965245937708269	91663	11	MYADM	GO
GO:0048339	paraxial mesoderm development	5/540	17/18862	8.78025632917216e-05	0.0124849580319325	0.01062873134584	4087	5	SMAD2	GO
GO:0048339	paraxial mesoderm development	5/540	17/18862	8.78025632917216e-05	0.0124849580319325	0.01062873134584	4088	5	SMAD3	GO
GO:0048339	paraxial mesoderm development	5/540	17/18862	8.78025632917216e-05	0.0124849580319325	0.01062873134584	10413	5	YAP1	GO
GO:0048339	paraxial mesoderm development	5/540	17/18862	8.78025632917216e-05	0.0124849580319325	0.01062873134584	56983	5	POGLUT1	GO
GO:0048339	paraxial mesoderm development	5/540	17/18862	8.78025632917216e-05	0.0124849580319325	0.01062873134584	7474	5	WNT5A	GO
GO:0030323	respiratory tube development	15/540	167/18862	9.44603305754928e-05	0.0130119105367741	0.0110773381086063	6431	15	SRSF6	GO
GO:0030323	respiratory tube development	15/540	167/18862	9.44603305754928e-05	0.0130119105367741	0.0110773381086063	5154	15	PDGFA	GO
GO:0030323	respiratory tube development	15/540	167/18862	9.44603305754928e-05	0.0130119105367741	0.0110773381086063	1977	15	EIF4E	GO
GO:0030323	respiratory tube development	15/540	167/18862	9.44603305754928e-05	0.0130119105367741	0.0110773381086063	4087	15	SMAD2	GO
GO:0030323	respiratory tube development	15/540	167/18862	9.44603305754928e-05	0.0130119105367741	0.0110773381086063	2254	15	FGF9	GO
GO:0030323	respiratory tube development	15/540	167/18862	9.44603305754928e-05	0.0130119105367741	0.0110773381086063	55294	15	FBXW7	GO
GO:0030323	respiratory tube development	15/540	167/18862	9.44603305754928e-05	0.0130119105367741	0.0110773381086063	10427	15	SEC24B	GO
GO:0030323	respiratory tube development	15/540	167/18862	9.44603305754928e-05	0.0130119105367741	0.0110773381086063	83716	15	CRISPLD2	GO
GO:0030323	respiratory tube development	15/540	167/18862	9.44603305754928e-05	0.0130119105367741	0.0110773381086063	79977	15	GRHL2	GO
GO:0030323	respiratory tube development	15/540	167/18862	9.44603305754928e-05	0.0130119105367741	0.0110773381086063	51696	15	HECA	GO
GO:0030323	respiratory tube development	15/540	167/18862	9.44603305754928e-05	0.0130119105367741	0.0110773381086063	10413	15	YAP1	GO
GO:0030323	respiratory tube development	15/540	167/18862	9.44603305754928e-05	0.0130119105367741	0.0110773381086063	157506	15	RDH10	GO
GO:0030323	respiratory tube development	15/540	167/18862	9.44603305754928e-05	0.0130119105367741	0.0110773381086063	4781	15	NFIB	GO
GO:0030323	respiratory tube development	15/540	167/18862	9.44603305754928e-05	0.0130119105367741	0.0110773381086063	5594	15	MAPK1	GO
GO:0030323	respiratory tube development	15/540	167/18862	9.44603305754928e-05	0.0130119105367741	0.0110773381086063	7474	15	WNT5A	GO
GO:0032259	methylation	24/540	359/18862	0.000114624213673198	0.0142679344273723	0.0121466200767939	84193	24	SETD3	GO
GO:0032259	methylation	24/540	359/18862	0.000114624213673198	0.0142679344273723	0.0121466200767939	1499	24	CTNNB1	GO
GO:0032259	methylation	24/540	359/18862	0.000114624213673198	0.0142679344273723	0.0121466200767939	9589	24	WTAP	GO
GO:0032259	methylation	24/540	359/18862	0.000114624213673198	0.0142679344273723	0.0121466200767939	55251	24	PCMTD2	GO
GO:0032259	methylation	24/540	359/18862	0.000114624213673198	0.0142679344273723	0.0121466200767939	54904	24	NSD3	GO
GO:0032259	methylation	24/540	359/18862	0.000114624213673198	0.0142679344273723	0.0121466200767939	8473	24	OGT	GO
GO:0032259	methylation	24/540	359/18862	0.000114624213673198	0.0142679344273723	0.0121466200767939	1788	24	DNMT3A	GO
GO:0032259	methylation	24/540	359/18862	0.000114624213673198	0.0142679344273723	0.0121466200767939	27292	24	DIMT1	GO
GO:0032259	methylation	24/540	359/18862	0.000114624213673198	0.0142679344273723	0.0121466200767939	9545	24	RAB3D	GO
GO:0032259	methylation	24/540	359/18862	0.000114624213673198	0.0142679344273723	0.0121466200767939	79977	24	GRHL2	GO
GO:0032259	methylation	24/540	359/18862	0.000114624213673198	0.0142679344273723	0.0121466200767939	5870	24	RAB6A	GO
GO:0032259	methylation	24/540	359/18862	0.000114624213673198	0.0142679344273723	0.0121466200767939	91646	24	TDRD12	GO
GO:0032259	methylation	24/540	359/18862	0.000114624213673198	0.0142679344273723	0.0121466200767939	5929	24	RBBP5	GO
GO:0032259	methylation	24/540	359/18862	0.000114624213673198	0.0142679344273723	0.0121466200767939	23512	24	SUZ12	GO
GO:0032259	methylation	24/540	359/18862	0.000114624213673198	0.0142679344273723	0.0121466200767939	115294	24	PCMTD1	GO
GO:0032259	methylation	24/540	359/18862	0.000114624213673198	0.0142679344273723	0.0121466200767939	51490	24	SPOUT1	GO
GO:0032259	methylation	24/540	359/18862	0.000114624213673198	0.0142679344273723	0.0121466200767939	57673	24	BEND3	GO
GO:0032259	methylation	24/540	359/18862	0.000114624213673198	0.0142679344273723	0.0121466200767939	25895	24	EEF1AKMT3	GO
GO:0032259	methylation	24/540	359/18862	0.000114624213673198	0.0142679344273723	0.0121466200767939	399818	24	EEF1AKMT2	GO
GO:0032259	methylation	24/540	359/18862	0.000114624213673198	0.0142679344273723	0.0121466200767939	23411	24	SIRT1	GO
GO:0032259	methylation	24/540	359/18862	0.000114624213673198	0.0142679344273723	0.0121466200767939	124512	24	METTL23	GO
GO:0032259	methylation	24/540	359/18862	0.000114624213673198	0.0142679344273723	0.0121466200767939	163589	24	TDRD5	GO
GO:0032259	methylation	24/540	359/18862	0.000114624213673198	0.0142679344273723	0.0121466200767939	191	24	AHCY	GO
GO:0032259	methylation	24/540	359/18862	0.000114624213673198	0.0142679344273723	0.0121466200767939	23067	24	SETD1B	GO
GO:0006479	protein methylation	15/540	170/18862	0.000115432356835681	0.0142679344273723	0.0121466200767939	84193	15	SETD3	GO
GO:0006479	protein methylation	15/540	170/18862	0.000115432356835681	0.0142679344273723	0.0121466200767939	1499	15	CTNNB1	GO
GO:0006479	protein methylation	15/540	170/18862	0.000115432356835681	0.0142679344273723	0.0121466200767939	55251	15	PCMTD2	GO
GO:0006479	protein methylation	15/540	170/18862	0.000115432356835681	0.0142679344273723	0.0121466200767939	54904	15	NSD3	GO
GO:0006479	protein methylation	15/540	170/18862	0.000115432356835681	0.0142679344273723	0.0121466200767939	8473	15	OGT	GO
GO:0006479	protein methylation	15/540	170/18862	0.000115432356835681	0.0142679344273723	0.0121466200767939	9545	15	RAB3D	GO
GO:0006479	protein methylation	15/540	170/18862	0.000115432356835681	0.0142679344273723	0.0121466200767939	5870	15	RAB6A	GO
GO:0006479	protein methylation	15/540	170/18862	0.000115432356835681	0.0142679344273723	0.0121466200767939	5929	15	RBBP5	GO
GO:0006479	protein methylation	15/540	170/18862	0.000115432356835681	0.0142679344273723	0.0121466200767939	23512	15	SUZ12	GO
GO:0006479	protein methylation	15/540	170/18862	0.000115432356835681	0.0142679344273723	0.0121466200767939	115294	15	PCMTD1	GO
GO:0006479	protein methylation	15/540	170/18862	0.000115432356835681	0.0142679344273723	0.0121466200767939	57673	15	BEND3	GO
GO:0006479	protein methylation	15/540	170/18862	0.000115432356835681	0.0142679344273723	0.0121466200767939	25895	15	EEF1AKMT3	GO
GO:0006479	protein methylation	15/540	170/18862	0.000115432356835681	0.0142679344273723	0.0121466200767939	399818	15	EEF1AKMT2	GO
GO:0006479	protein methylation	15/540	170/18862	0.000115432356835681	0.0142679344273723	0.0121466200767939	23411	15	SIRT1	GO
GO:0006479	protein methylation	15/540	170/18862	0.000115432356835681	0.0142679344273723	0.0121466200767939	23067	15	SETD1B	GO
GO:0008213	protein alkylation	15/540	170/18862	0.000115432356835681	0.0142679344273723	0.0121466200767939	84193	15	SETD3	GO
GO:0008213	protein alkylation	15/540	170/18862	0.000115432356835681	0.0142679344273723	0.0121466200767939	1499	15	CTNNB1	GO
GO:0008213	protein alkylation	15/540	170/18862	0.000115432356835681	0.0142679344273723	0.0121466200767939	55251	15	PCMTD2	GO
GO:0008213	protein alkylation	15/540	170/18862	0.000115432356835681	0.0142679344273723	0.0121466200767939	54904	15	NSD3	GO
GO:0008213	protein alkylation	15/540	170/18862	0.000115432356835681	0.0142679344273723	0.0121466200767939	8473	15	OGT	GO
GO:0008213	protein alkylation	15/540	170/18862	0.000115432356835681	0.0142679344273723	0.0121466200767939	9545	15	RAB3D	GO
GO:0008213	protein alkylation	15/540	170/18862	0.000115432356835681	0.0142679344273723	0.0121466200767939	5870	15	RAB6A	GO
GO:0008213	protein alkylation	15/540	170/18862	0.000115432356835681	0.0142679344273723	0.0121466200767939	5929	15	RBBP5	GO
GO:0008213	protein alkylation	15/540	170/18862	0.000115432356835681	0.0142679344273723	0.0121466200767939	23512	15	SUZ12	GO
GO:0008213	protein alkylation	15/540	170/18862	0.000115432356835681	0.0142679344273723	0.0121466200767939	115294	15	PCMTD1	GO
GO:0008213	protein alkylation	15/540	170/18862	0.000115432356835681	0.0142679344273723	0.0121466200767939	57673	15	BEND3	GO
GO:0008213	protein alkylation	15/540	170/18862	0.000115432356835681	0.0142679344273723	0.0121466200767939	25895	15	EEF1AKMT3	GO
GO:0008213	protein alkylation	15/540	170/18862	0.000115432356835681	0.0142679344273723	0.0121466200767939	399818	15	EEF1AKMT2	GO
GO:0008213	protein alkylation	15/540	170/18862	0.000115432356835681	0.0142679344273723	0.0121466200767939	23411	15	SIRT1	GO
GO:0008213	protein alkylation	15/540	170/18862	0.000115432356835681	0.0142679344273723	0.0121466200767939	23067	15	SETD1B	GO
GO:0048608	reproductive structure development	26/540	405/18862	0.000116525780259846	0.0142679344273723	0.0121466200767939	5728	26	PTEN	GO
GO:0048608	reproductive structure development	26/540	405/18862	0.000116525780259846	0.0142679344273723	0.0121466200767939	92	26	ACVR2A	GO
GO:0048608	reproductive structure development	26/540	405/18862	0.000116525780259846	0.0142679344273723	0.0121466200767939	7543	26	ZFX	GO
GO:0048608	reproductive structure development	26/540	405/18862	0.000116525780259846	0.0142679344273723	0.0121466200767939	7046	26	TGFBR1	GO
GO:0048608	reproductive structure development	26/540	405/18862	0.000116525780259846	0.0142679344273723	0.0121466200767939	2254	26	FGF9	GO
GO:0048608	reproductive structure development	26/540	405/18862	0.000116525780259846	0.0142679344273723	0.0121466200767939	658	26	BMPR1B	GO
GO:0048608	reproductive structure development	26/540	405/18862	0.000116525780259846	0.0142679344273723	0.0121466200767939	3157	26	HMGCS1	GO
GO:0048608	reproductive structure development	26/540	405/18862	0.000116525780259846	0.0142679344273723	0.0121466200767939	5469	26	MED1	GO
GO:0048608	reproductive structure development	26/540	405/18862	0.000116525780259846	0.0142679344273723	0.0121466200767939	4824	26	NKX3-1	GO
GO:0048608	reproductive structure development	26/540	405/18862	0.000116525780259846	0.0142679344273723	0.0121466200767939	8728	26	ADAM19	GO
GO:0048608	reproductive structure development	26/540	405/18862	0.000116525780259846	0.0142679344273723	0.0121466200767939	79977	26	GRHL2	GO
GO:0048608	reproductive structure development	26/540	405/18862	0.000116525780259846	0.0142679344273723	0.0121466200767939	1739	26	DLG1	GO
GO:0048608	reproductive structure development	26/540	405/18862	0.000116525780259846	0.0142679344273723	0.0121466200767939	9468	26	PCYT1B	GO
GO:0048608	reproductive structure development	26/540	405/18862	0.000116525780259846	0.0142679344273723	0.0121466200767939	5270	26	SERPINE2	GO
GO:0048608	reproductive structure development	26/540	405/18862	0.000116525780259846	0.0142679344273723	0.0121466200767939	59338	26	PLEKHA1	GO
GO:0048608	reproductive structure development	26/540	405/18862	0.000116525780259846	0.0142679344273723	0.0121466200767939	835	26	CASP2	GO
GO:0048608	reproductive structure development	26/540	405/18862	0.000116525780259846	0.0142679344273723	0.0121466200767939	431707	26	LHX8	GO
GO:0048608	reproductive structure development	26/540	405/18862	0.000116525780259846	0.0142679344273723	0.0121466200767939	157506	26	RDH10	GO
GO:0048608	reproductive structure development	26/540	405/18862	0.000116525780259846	0.0142679344273723	0.0121466200767939	10461	26	MERTK	GO
GO:0048608	reproductive structure development	26/540	405/18862	0.000116525780259846	0.0142679344273723	0.0121466200767939	405	26	ARNT	GO
GO:0048608	reproductive structure development	26/540	405/18862	0.000116525780259846	0.0142679344273723	0.0121466200767939	2885	26	GRB2	GO
GO:0048608	reproductive structure development	26/540	405/18862	0.000116525780259846	0.0142679344273723	0.0121466200767939	5594	26	MAPK1	GO
GO:0048608	reproductive structure development	26/540	405/18862	0.000116525780259846	0.0142679344273723	0.0121466200767939	23411	26	SIRT1	GO
GO:0048608	reproductive structure development	26/540	405/18862	0.000116525780259846	0.0142679344273723	0.0121466200767939	4257	26	MGST1	GO
GO:0048608	reproductive structure development	26/540	405/18862	0.000116525780259846	0.0142679344273723	0.0121466200767939	7022	26	TFAP2C	GO
GO:0048608	reproductive structure development	26/540	405/18862	0.000116525780259846	0.0142679344273723	0.0121466200767939	7474	26	WNT5A	GO
GO:0007517	muscle organ development	22/540	317/18862	0.000128377273040863	0.0151285791771065	0.0128793067070361	5530	22	PPP3CA	GO
GO:0007517	muscle organ development	22/540	317/18862	0.000128377273040863	0.0151285791771065	0.0128793067070361	7046	22	TGFBR1	GO
GO:0007517	muscle organ development	22/540	317/18862	0.000128377273040863	0.0151285791771065	0.0128793067070361	9099	22	USP2	GO
GO:0007517	muscle organ development	22/540	317/18862	0.000128377273040863	0.0151285791771065	0.0128793067070361	5469	22	MED1	GO
GO:0007517	muscle organ development	22/540	317/18862	0.000128377273040863	0.0151285791771065	0.0128793067070361	10521	22	DDX17	GO
GO:0007517	muscle organ development	22/540	317/18862	0.000128377273040863	0.0151285791771065	0.0128793067070361	8087	22	FXR1	GO
GO:0007517	muscle organ development	22/540	317/18862	0.000128377273040863	0.0151285791771065	0.0128793067070361	56704	22	JPH1	GO
GO:0007517	muscle organ development	22/540	317/18862	0.000128377273040863	0.0151285791771065	0.0128793067070361	51460	22	SFMBT1	GO
GO:0007517	muscle organ development	22/540	317/18862	0.000128377273040863	0.0151285791771065	0.0128793067070361	4088	22	SMAD3	GO
GO:0007517	muscle organ development	22/540	317/18862	0.000128377273040863	0.0151285791771065	0.0128793067070361	1756	22	DMD	GO
GO:0007517	muscle organ development	22/540	317/18862	0.000128377273040863	0.0151285791771065	0.0128793067070361	7049	22	TGFBR3	GO
GO:0007517	muscle organ development	22/540	317/18862	0.000128377273040863	0.0151285791771065	0.0128793067070361	6262	22	RYR2	GO
GO:0007517	muscle organ development	22/540	317/18862	0.000128377273040863	0.0151285791771065	0.0128793067070361	10472	22	ZBTB18	GO
GO:0007517	muscle organ development	22/540	317/18862	0.000128377273040863	0.0151285791771065	0.0128793067070361	1958	22	EGR1	GO
GO:0007517	muscle organ development	22/540	317/18862	0.000128377273040863	0.0151285791771065	0.0128793067070361	3344	22	FOXN2	GO
GO:0007517	muscle organ development	22/540	317/18862	0.000128377273040863	0.0151285791771065	0.0128793067070361	4625	22	MYH7	GO
GO:0007517	muscle organ development	22/540	317/18862	0.000128377273040863	0.0151285791771065	0.0128793067070361	6938	22	TCF12	GO
GO:0007517	muscle organ development	22/540	317/18862	0.000128377273040863	0.0151285791771065	0.0128793067070361	23411	22	SIRT1	GO
GO:0007517	muscle organ development	22/540	317/18862	0.000128377273040863	0.0151285791771065	0.0128793067070361	56203	22	LMOD3	GO
GO:0007517	muscle organ development	22/540	317/18862	0.000128377273040863	0.0151285791771065	0.0128793067070361	9975	22	NR1D2	GO
GO:0007517	muscle organ development	22/540	317/18862	0.000128377273040863	0.0151285791771065	0.0128793067070361	7474	22	WNT5A	GO
GO:0007517	muscle organ development	22/540	317/18862	0.000128377273040863	0.0151285791771065	0.0128793067070361	59269	22	HIVEP3	GO
GO:0061458	reproductive system development	26/540	408/18862	0.000131166822772192	0.0151285791771065	0.0128793067070361	5728	26	PTEN	GO
GO:0061458	reproductive system development	26/540	408/18862	0.000131166822772192	0.0151285791771065	0.0128793067070361	92	26	ACVR2A	GO
GO:0061458	reproductive system development	26/540	408/18862	0.000131166822772192	0.0151285791771065	0.0128793067070361	7543	26	ZFX	GO
GO:0061458	reproductive system development	26/540	408/18862	0.000131166822772192	0.0151285791771065	0.0128793067070361	7046	26	TGFBR1	GO
GO:0061458	reproductive system development	26/540	408/18862	0.000131166822772192	0.0151285791771065	0.0128793067070361	2254	26	FGF9	GO
GO:0061458	reproductive system development	26/540	408/18862	0.000131166822772192	0.0151285791771065	0.0128793067070361	658	26	BMPR1B	GO
GO:0061458	reproductive system development	26/540	408/18862	0.000131166822772192	0.0151285791771065	0.0128793067070361	3157	26	HMGCS1	GO
GO:0061458	reproductive system development	26/540	408/18862	0.000131166822772192	0.0151285791771065	0.0128793067070361	5469	26	MED1	GO
GO:0061458	reproductive system development	26/540	408/18862	0.000131166822772192	0.0151285791771065	0.0128793067070361	4824	26	NKX3-1	GO
GO:0061458	reproductive system development	26/540	408/18862	0.000131166822772192	0.0151285791771065	0.0128793067070361	8728	26	ADAM19	GO
GO:0061458	reproductive system development	26/540	408/18862	0.000131166822772192	0.0151285791771065	0.0128793067070361	79977	26	GRHL2	GO
GO:0061458	reproductive system development	26/540	408/18862	0.000131166822772192	0.0151285791771065	0.0128793067070361	1739	26	DLG1	GO
GO:0061458	reproductive system development	26/540	408/18862	0.000131166822772192	0.0151285791771065	0.0128793067070361	9468	26	PCYT1B	GO
GO:0061458	reproductive system development	26/540	408/18862	0.000131166822772192	0.0151285791771065	0.0128793067070361	5270	26	SERPINE2	GO
GO:0061458	reproductive system development	26/540	408/18862	0.000131166822772192	0.0151285791771065	0.0128793067070361	59338	26	PLEKHA1	GO
GO:0061458	reproductive system development	26/540	408/18862	0.000131166822772192	0.0151285791771065	0.0128793067070361	835	26	CASP2	GO
GO:0061458	reproductive system development	26/540	408/18862	0.000131166822772192	0.0151285791771065	0.0128793067070361	431707	26	LHX8	GO
GO:0061458	reproductive system development	26/540	408/18862	0.000131166822772192	0.0151285791771065	0.0128793067070361	157506	26	RDH10	GO
GO:0061458	reproductive system development	26/540	408/18862	0.000131166822772192	0.0151285791771065	0.0128793067070361	10461	26	MERTK	GO
GO:0061458	reproductive system development	26/540	408/18862	0.000131166822772192	0.0151285791771065	0.0128793067070361	405	26	ARNT	GO
GO:0061458	reproductive system development	26/540	408/18862	0.000131166822772192	0.0151285791771065	0.0128793067070361	2885	26	GRB2	GO
GO:0061458	reproductive system development	26/540	408/18862	0.000131166822772192	0.0151285791771065	0.0128793067070361	5594	26	MAPK1	GO
GO:0061458	reproductive system development	26/540	408/18862	0.000131166822772192	0.0151285791771065	0.0128793067070361	23411	26	SIRT1	GO
GO:0061458	reproductive system development	26/540	408/18862	0.000131166822772192	0.0151285791771065	0.0128793067070361	4257	26	MGST1	GO
GO:0061458	reproductive system development	26/540	408/18862	0.000131166822772192	0.0151285791771065	0.0128793067070361	7022	26	TFAP2C	GO
GO:0061458	reproductive system development	26/540	408/18862	0.000131166822772192	0.0151285791771065	0.0128793067070361	7474	26	WNT5A	GO
GO:0034976	response to endoplasmic reticulum stress	21/540	296/18862	0.000133850859325579	0.0151285791771065	0.0128793067070361	6400	21	SEL1L	GO
GO:0034976	response to endoplasmic reticulum stress	21/540	296/18862	0.000133850859325579	0.0151285791771065	0.0128793067070361	23435	21	TARDBP	GO
GO:0034976	response to endoplasmic reticulum stress	21/540	296/18862	0.000133850859325579	0.0151285791771065	0.0128793067070361	55161	21	TMEM33	GO
GO:0034976	response to endoplasmic reticulum stress	21/540	296/18862	0.000133850859325579	0.0151285791771065	0.0128793067070361	160418	21	TMTC3	GO
GO:0034976	response to endoplasmic reticulum stress	21/540	296/18862	0.000133850859325579	0.0151285791771065	0.0128793067070361	51283	21	BFAR	GO
GO:0034976	response to endoplasmic reticulum stress	21/540	296/18862	0.000133850859325579	0.0151285791771065	0.0128793067070361	9354	21	UBE4A	GO
GO:0034976	response to endoplasmic reticulum stress	21/540	296/18862	0.000133850859325579	0.0151285791771065	0.0128793067070361	58477	21	SRPRB	GO
GO:0034976	response to endoplasmic reticulum stress	21/540	296/18862	0.000133850859325579	0.0151285791771065	0.0128793067070361	51009	21	DERL2	GO
GO:0034976	response to endoplasmic reticulum stress	21/540	296/18862	0.000133850859325579	0.0151285791771065	0.0128793067070361	7993	21	UBXN8	GO
GO:0034976	response to endoplasmic reticulum stress	21/540	296/18862	0.000133850859325579	0.0151285791771065	0.0128793067070361	55432	21	YOD1	GO
GO:0034976	response to endoplasmic reticulum stress	21/540	296/18862	0.000133850859325579	0.0151285791771065	0.0128793067070361	90993	21	CREB3L1	GO
GO:0034976	response to endoplasmic reticulum stress	21/540	296/18862	0.000133850859325579	0.0151285791771065	0.0128793067070361	5611	21	DNAJC3	GO
GO:0034976	response to endoplasmic reticulum stress	21/540	296/18862	0.000133850859325579	0.0151285791771065	0.0128793067070361	7157	21	TP53	GO
GO:0034976	response to endoplasmic reticulum stress	21/540	296/18862	0.000133850859325579	0.0151285791771065	0.0128793067070361	9601	21	PDIA4	GO
GO:0034976	response to endoplasmic reticulum stress	21/540	296/18862	0.000133850859325579	0.0151285791771065	0.0128793067070361	55666	21	NPLOC4	GO
GO:0034976	response to endoplasmic reticulum stress	21/540	296/18862	0.000133850859325579	0.0151285791771065	0.0128793067070361	9695	21	EDEM1	GO
GO:0034976	response to endoplasmic reticulum stress	21/540	296/18862	0.000133850859325579	0.0151285791771065	0.0128793067070361	11153	21	FICD	GO
GO:0034976	response to endoplasmic reticulum stress	21/540	296/18862	0.000133850859325579	0.0151285791771065	0.0128793067070361	1639	21	DCTN1	GO
GO:0034976	response to endoplasmic reticulum stress	21/540	296/18862	0.000133850859325579	0.0151285791771065	0.0128793067070361	23411	21	SIRT1	GO
GO:0034976	response to endoplasmic reticulum stress	21/540	296/18862	0.000133850859325579	0.0151285791771065	0.0128793067070361	29978	21	UBQLN2	GO
GO:0034976	response to endoplasmic reticulum stress	21/540	296/18862	0.000133850859325579	0.0151285791771065	0.0128793067070361	7094	21	TLN1	GO
GO:0010721	negative regulation of cell development	15/540	174/18862	0.000149632182037703	0.0164894664605549	0.0140378612885371	5728	15	PTEN	GO
GO:0010721	negative regulation of cell development	15/540	174/18862	0.000149632182037703	0.0164894664605549	0.0140378612885371	11221	15	DUSP10	GO
GO:0010721	negative regulation of cell development	15/540	174/18862	0.000149632182037703	0.0164894664605549	0.0140378612885371	5530	15	PPP3CA	GO
GO:0010721	negative regulation of cell development	15/540	174/18862	0.000149632182037703	0.0164894664605549	0.0140378612885371	2258	15	FGF13	GO
GO:0010721	negative regulation of cell development	15/540	174/18862	0.000149632182037703	0.0164894664605549	0.0140378612885371	55294	15	FBXW7	GO
GO:0010721	negative regulation of cell development	15/540	174/18862	0.000149632182037703	0.0164894664605549	0.0140378612885371	1946	15	EFNA5	GO
GO:0010721	negative regulation of cell development	15/540	174/18862	0.000149632182037703	0.0164894664605549	0.0140378612885371	6049	15	RNF6	GO
GO:0010721	negative regulation of cell development	15/540	174/18862	0.000149632182037703	0.0164894664605549	0.0140378612885371	7157	15	TP53	GO
GO:0010721	negative regulation of cell development	15/540	174/18862	0.000149632182037703	0.0164894664605549	0.0140378612885371	10507	15	SEMA4D	GO
GO:0010721	negative regulation of cell development	15/540	174/18862	0.000149632182037703	0.0164894664605549	0.0140378612885371	23500	15	DAAM2	GO
GO:0010721	negative regulation of cell development	15/540	174/18862	0.000149632182037703	0.0164894664605549	0.0140378612885371	2192	15	FBLN1	GO
GO:0010721	negative regulation of cell development	15/540	174/18862	0.000149632182037703	0.0164894664605549	0.0140378612885371	4241	15	MELTF	GO
GO:0010721	negative regulation of cell development	15/540	174/18862	0.000149632182037703	0.0164894664605549	0.0140378612885371	55435	15	AP1AR	GO
GO:0010721	negative regulation of cell development	15/540	174/18862	0.000149632182037703	0.0164894664605549	0.0140378612885371	7474	15	WNT5A	GO
GO:0010721	negative regulation of cell development	15/540	174/18862	0.000149632182037703	0.0164894664605549	0.0140378612885371	23111	15	SPART	GO
GO:0032868	response to insulin	20/540	278/18862	0.000159427247986687	0.0167128436056722	0.0142280273794587	5728	20	PTEN	GO
GO:0032868	response to insulin	20/540	278/18862	0.000159427247986687	0.0167128436056722	0.0142280273794587	6431	20	SRSF6	GO
GO:0032868	response to insulin	20/540	278/18862	0.000159427247986687	0.0167128436056722	0.0142280273794587	8473	20	OGT	GO
GO:0032868	response to insulin	20/540	278/18862	0.000159427247986687	0.0167128436056722	0.0142280273794587	143686	20	SESN3	GO
GO:0032868	response to insulin	20/540	278/18862	0.000159427247986687	0.0167128436056722	0.0142280273794587	3480	20	IGF1R	GO
GO:0032868	response to insulin	20/540	278/18862	0.000159427247986687	0.0167128436056722	0.0142280273794587	64506	20	CPEB1	GO
GO:0032868	response to insulin	20/540	278/18862	0.000159427247986687	0.0167128436056722	0.0142280273794587	5305	20	PIP4K2A	GO
GO:0032868	response to insulin	20/540	278/18862	0.000159427247986687	0.0167128436056722	0.0142280273794587	5315	20	PKM	GO
GO:0032868	response to insulin	20/540	278/18862	0.000159427247986687	0.0167128436056722	0.0142280273794587	2822	20	GPLD1	GO
GO:0032868	response to insulin	20/540	278/18862	0.000159427247986687	0.0167128436056722	0.0142280273794587	6667	20	SP1	GO
GO:0032868	response to insulin	20/540	278/18862	0.000159427247986687	0.0167128436056722	0.0142280273794587	2241	20	FER	GO
GO:0032868	response to insulin	20/540	278/18862	0.000159427247986687	0.0167128436056722	0.0142280273794587	1958	20	EGR1	GO
GO:0032868	response to insulin	20/540	278/18862	0.000159427247986687	0.0167128436056722	0.0142280273794587	3643	20	INSR	GO
GO:0032868	response to insulin	20/540	278/18862	0.000159427247986687	0.0167128436056722	0.0142280273794587	9852	20	EPM2AIP1	GO
GO:0032868	response to insulin	20/540	278/18862	0.000159427247986687	0.0167128436056722	0.0142280273794587	23433	20	RHOQ	GO
GO:0032868	response to insulin	20/540	278/18862	0.000159427247986687	0.0167128436056722	0.0142280273794587	2885	20	GRB2	GO
GO:0032868	response to insulin	20/540	278/18862	0.000159427247986687	0.0167128436056722	0.0142280273794587	23411	20	SIRT1	GO
GO:0032868	response to insulin	20/540	278/18862	0.000159427247986687	0.0167128436056722	0.0142280273794587	4641	20	MYO1C	GO
GO:0032868	response to insulin	20/540	278/18862	0.000159427247986687	0.0167128436056722	0.0142280273794587	10014	20	HDAC5	GO
GO:0032868	response to insulin	20/540	278/18862	0.000159427247986687	0.0167128436056722	0.0142280273794587	140710	20	SOGA1	GO
GO:0009306	protein secretion	24/540	367/18862	0.000160134337224178	0.0167128436056722	0.0142280273794587	6558	24	SLC12A2	GO
GO:0009306	protein secretion	24/540	367/18862	0.000160134337224178	0.0167128436056722	0.0142280273794587	19	24	ABCA1	GO
GO:0009306	protein secretion	24/540	367/18862	0.000160134337224178	0.0167128436056722	0.0142280273794587	6400	24	SEL1L	GO
GO:0009306	protein secretion	24/540	367/18862	0.000160134337224178	0.0167128436056722	0.0142280273794587	5208	24	PFKFB2	GO
GO:0009306	protein secretion	24/540	367/18862	0.000160134337224178	0.0167128436056722	0.0142280273794587	5530	24	PPP3CA	GO
GO:0009306	protein secretion	24/540	367/18862	0.000160134337224178	0.0167128436056722	0.0142280273794587	7074	24	TIAM1	GO
GO:0009306	protein secretion	24/540	367/18862	0.000160134337224178	0.0167128436056722	0.0142280273794587	23435	24	TARDBP	GO
GO:0009306	protein secretion	24/540	367/18862	0.000160134337224178	0.0167128436056722	0.0142280273794587	4087	24	SMAD2	GO
GO:0009306	protein secretion	24/540	367/18862	0.000160134337224178	0.0167128436056722	0.0142280273794587	382	24	ARF6	GO
GO:0009306	protein secretion	24/540	367/18862	0.000160134337224178	0.0167128436056722	0.0142280273794587	55204	24	GOLPH3L	GO
GO:0009306	protein secretion	24/540	367/18862	0.000160134337224178	0.0167128436056722	0.0142280273794587	9545	24	RAB3D	GO
GO:0009306	protein secretion	24/540	367/18862	0.000160134337224178	0.0167128436056722	0.0142280273794587	387597	24	ILDR2	GO
GO:0009306	protein secretion	24/540	367/18862	0.000160134337224178	0.0167128436056722	0.0142280273794587	22841	24	RAB11FIP2	GO
GO:0009306	protein secretion	24/540	367/18862	0.000160134337224178	0.0167128436056722	0.0142280273794587	7430	24	EZR	GO
GO:0009306	protein secretion	24/540	367/18862	0.000160134337224178	0.0167128436056722	0.0142280273794587	1946	24	EFNA5	GO
GO:0009306	protein secretion	24/540	367/18862	0.000160134337224178	0.0167128436056722	0.0142280273794587	84830	24	ADTRP	GO
GO:0009306	protein secretion	24/540	367/18862	0.000160134337224178	0.0167128436056722	0.0142280273794587	6659	24	SOX4	GO
GO:0009306	protein secretion	24/540	367/18862	0.000160134337224178	0.0167128436056722	0.0142280273794587	2822	24	GPLD1	GO
GO:0009306	protein secretion	24/540	367/18862	0.000160134337224178	0.0167128436056722	0.0142280273794587	9601	24	PDIA4	GO
GO:0009306	protein secretion	24/540	367/18862	0.000160134337224178	0.0167128436056722	0.0142280273794587	388552	24	BLOC1S3	GO
GO:0009306	protein secretion	24/540	367/18862	0.000160134337224178	0.0167128436056722	0.0142280273794587	134957	24	STXBP5	GO
GO:0009306	protein secretion	24/540	367/18862	0.000160134337224178	0.0167128436056722	0.0142280273794587	2850	24	GPR27	GO
GO:0009306	protein secretion	24/540	367/18862	0.000160134337224178	0.0167128436056722	0.0142280273794587	80024	24	SLC8B1	GO
GO:0009306	protein secretion	24/540	367/18862	0.000160134337224178	0.0167128436056722	0.0142280273794587	8609	24	KLF7	GO
GO:0060284	regulation of cell development	29/540	485/18862	0.000164987322522677	0.0167128436056722	0.0142280273794587	5728	29	PTEN	GO
GO:0060284	regulation of cell development	29/540	485/18862	0.000164987322522677	0.0167128436056722	0.0142280273794587	1499	29	CTNNB1	GO
GO:0060284	regulation of cell development	29/540	485/18862	0.000164987322522677	0.0167128436056722	0.0142280273794587	6498	29	SKIL	GO
GO:0060284	regulation of cell development	29/540	485/18862	0.000164987322522677	0.0167128436056722	0.0142280273794587	80005	29	DOCK5	GO
GO:0060284	regulation of cell development	29/540	485/18862	0.000164987322522677	0.0167128436056722	0.0142280273794587	11221	29	DUSP10	GO
GO:0060284	regulation of cell development	29/540	485/18862	0.000164987322522677	0.0167128436056722	0.0142280273794587	80823	29	BHLHB9	GO
GO:0060284	regulation of cell development	29/540	485/18862	0.000164987322522677	0.0167128436056722	0.0142280273794587	5530	29	PPP3CA	GO
GO:0060284	regulation of cell development	29/540	485/18862	0.000164987322522677	0.0167128436056722	0.0142280273794587	7074	29	TIAM1	GO
GO:0060284	regulation of cell development	29/540	485/18862	0.000164987322522677	0.0167128436056722	0.0142280273794587	6239	29	RREB1	GO
GO:0060284	regulation of cell development	29/540	485/18862	0.000164987322522677	0.0167128436056722	0.0142280273794587	2258	29	FGF13	GO
GO:0060284	regulation of cell development	29/540	485/18862	0.000164987322522677	0.0167128436056722	0.0142280273794587	55294	29	FBXW7	GO
GO:0060284	regulation of cell development	29/540	485/18862	0.000164987322522677	0.0167128436056722	0.0142280273794587	1946	29	EFNA5	GO
GO:0060284	regulation of cell development	29/540	485/18862	0.000164987322522677	0.0167128436056722	0.0142280273794587	55604	29	CARMIL1	GO
GO:0060284	regulation of cell development	29/540	485/18862	0.000164987322522677	0.0167128436056722	0.0142280273794587	6049	29	RNF6	GO
GO:0060284	regulation of cell development	29/540	485/18862	0.000164987322522677	0.0167128436056722	0.0142280273794587	5270	29	SERPINE2	GO
GO:0060284	regulation of cell development	29/540	485/18862	0.000164987322522677	0.0167128436056722	0.0142280273794587	7157	29	TP53	GO
GO:0060284	regulation of cell development	29/540	485/18862	0.000164987322522677	0.0167128436056722	0.0142280273794587	10413	29	YAP1	GO
GO:0060284	regulation of cell development	29/540	485/18862	0.000164987322522677	0.0167128436056722	0.0142280273794587	23011	29	RAB21	GO
GO:0060284	regulation of cell development	29/540	485/18862	0.000164987322522677	0.0167128436056722	0.0142280273794587	4131	29	MAP1B	GO
GO:0060284	regulation of cell development	29/540	485/18862	0.000164987322522677	0.0167128436056722	0.0142280273794587	10507	29	SEMA4D	GO
GO:0060284	regulation of cell development	29/540	485/18862	0.000164987322522677	0.0167128436056722	0.0142280273794587	23500	29	DAAM2	GO
GO:0060284	regulation of cell development	29/540	485/18862	0.000164987322522677	0.0167128436056722	0.0142280273794587	2192	29	FBLN1	GO
GO:0060284	regulation of cell development	29/540	485/18862	0.000164987322522677	0.0167128436056722	0.0142280273794587	56203	29	LMOD3	GO
GO:0060284	regulation of cell development	29/540	485/18862	0.000164987322522677	0.0167128436056722	0.0142280273794587	4241	29	MELTF	GO
GO:0060284	regulation of cell development	29/540	485/18862	0.000164987322522677	0.0167128436056722	0.0142280273794587	55435	29	AP1AR	GO
GO:0060284	regulation of cell development	29/540	485/18862	0.000164987322522677	0.0167128436056722	0.0142280273794587	5361	29	PLXNA1	GO
GO:0060284	regulation of cell development	29/540	485/18862	0.000164987322522677	0.0167128436056722	0.0142280273794587	7474	29	WNT5A	GO
GO:0060284	regulation of cell development	29/540	485/18862	0.000164987322522677	0.0167128436056722	0.0142280273794587	23111	29	SPART	GO
GO:0060284	regulation of cell development	29/540	485/18862	0.000164987322522677	0.0167128436056722	0.0142280273794587	91663	29	MYADM	GO
GO:0035592	establishment of protein localization to extracellular region	24/540	368/18862	0.000166825117660974	0.0167128436056722	0.0142280273794587	6558	24	SLC12A2	GO
GO:0035592	establishment of protein localization to extracellular region	24/540	368/18862	0.000166825117660974	0.0167128436056722	0.0142280273794587	19	24	ABCA1	GO
GO:0035592	establishment of protein localization to extracellular region	24/540	368/18862	0.000166825117660974	0.0167128436056722	0.0142280273794587	6400	24	SEL1L	GO
GO:0035592	establishment of protein localization to extracellular region	24/540	368/18862	0.000166825117660974	0.0167128436056722	0.0142280273794587	5208	24	PFKFB2	GO
GO:0035592	establishment of protein localization to extracellular region	24/540	368/18862	0.000166825117660974	0.0167128436056722	0.0142280273794587	5530	24	PPP3CA	GO
GO:0035592	establishment of protein localization to extracellular region	24/540	368/18862	0.000166825117660974	0.0167128436056722	0.0142280273794587	7074	24	TIAM1	GO
GO:0035592	establishment of protein localization to extracellular region	24/540	368/18862	0.000166825117660974	0.0167128436056722	0.0142280273794587	23435	24	TARDBP	GO
GO:0035592	establishment of protein localization to extracellular region	24/540	368/18862	0.000166825117660974	0.0167128436056722	0.0142280273794587	4087	24	SMAD2	GO
GO:0035592	establishment of protein localization to extracellular region	24/540	368/18862	0.000166825117660974	0.0167128436056722	0.0142280273794587	382	24	ARF6	GO
GO:0035592	establishment of protein localization to extracellular region	24/540	368/18862	0.000166825117660974	0.0167128436056722	0.0142280273794587	55204	24	GOLPH3L	GO
GO:0035592	establishment of protein localization to extracellular region	24/540	368/18862	0.000166825117660974	0.0167128436056722	0.0142280273794587	9545	24	RAB3D	GO
GO:0035592	establishment of protein localization to extracellular region	24/540	368/18862	0.000166825117660974	0.0167128436056722	0.0142280273794587	387597	24	ILDR2	GO
GO:0035592	establishment of protein localization to extracellular region	24/540	368/18862	0.000166825117660974	0.0167128436056722	0.0142280273794587	22841	24	RAB11FIP2	GO
GO:0035592	establishment of protein localization to extracellular region	24/540	368/18862	0.000166825117660974	0.0167128436056722	0.0142280273794587	7430	24	EZR	GO
GO:0035592	establishment of protein localization to extracellular region	24/540	368/18862	0.000166825117660974	0.0167128436056722	0.0142280273794587	1946	24	EFNA5	GO
GO:0035592	establishment of protein localization to extracellular region	24/540	368/18862	0.000166825117660974	0.0167128436056722	0.0142280273794587	84830	24	ADTRP	GO
GO:0035592	establishment of protein localization to extracellular region	24/540	368/18862	0.000166825117660974	0.0167128436056722	0.0142280273794587	6659	24	SOX4	GO
GO:0035592	establishment of protein localization to extracellular region	24/540	368/18862	0.000166825117660974	0.0167128436056722	0.0142280273794587	2822	24	GPLD1	GO
GO:0035592	establishment of protein localization to extracellular region	24/540	368/18862	0.000166825117660974	0.0167128436056722	0.0142280273794587	9601	24	PDIA4	GO
GO:0035592	establishment of protein localization to extracellular region	24/540	368/18862	0.000166825117660974	0.0167128436056722	0.0142280273794587	388552	24	BLOC1S3	GO
GO:0035592	establishment of protein localization to extracellular region	24/540	368/18862	0.000166825117660974	0.0167128436056722	0.0142280273794587	134957	24	STXBP5	GO
GO:0035592	establishment of protein localization to extracellular region	24/540	368/18862	0.000166825117660974	0.0167128436056722	0.0142280273794587	2850	24	GPR27	GO
GO:0035592	establishment of protein localization to extracellular region	24/540	368/18862	0.000166825117660974	0.0167128436056722	0.0142280273794587	80024	24	SLC8B1	GO
GO:0035592	establishment of protein localization to extracellular region	24/540	368/18862	0.000166825117660974	0.0167128436056722	0.0142280273794587	8609	24	KLF7	GO
GO:1903320	regulation of protein modification by small protein conjugation or removal	18/540	237/18862	0.000172047132528752	0.0168529724485942	0.0143473222798831	5728	18	PTEN	GO
GO:1903320	regulation of protein modification by small protein conjugation or removal	18/540	237/18862	0.000172047132528752	0.0168529724485942	0.0143473222798831	1499	18	CTNNB1	GO
GO:1903320	regulation of protein modification by small protein conjugation or removal	18/540	237/18862	0.000172047132528752	0.0168529724485942	0.0143473222798831	54165	18	DCUN1D1	GO
GO:1903320	regulation of protein modification by small protein conjugation or removal	18/540	237/18862	0.000172047132528752	0.0168529724485942	0.0143473222798831	23142	18	DCUN1D4	GO
GO:1903320	regulation of protein modification by small protein conjugation or removal	18/540	237/18862	0.000172047132528752	0.0168529724485942	0.0143473222798831	8473	18	OGT	GO
GO:1903320	regulation of protein modification by small protein conjugation or removal	18/540	237/18862	0.000172047132528752	0.0168529724485942	0.0143473222798831	7046	18	TGFBR1	GO
GO:1903320	regulation of protein modification by small protein conjugation or removal	18/540	237/18862	0.000172047132528752	0.0168529724485942	0.0143473222798831	55294	18	FBXW7	GO
GO:1903320	regulation of protein modification by small protein conjugation or removal	18/540	237/18862	0.000172047132528752	0.0168529724485942	0.0143473222798831	57561	18	ARRDC3	GO
GO:1903320	regulation of protein modification by small protein conjugation or removal	18/540	237/18862	0.000172047132528752	0.0168529724485942	0.0143473222798831	8915	18	BCL10	GO
GO:1903320	regulation of protein modification by small protein conjugation or removal	18/540	237/18862	0.000172047132528752	0.0168529724485942	0.0143473222798831	11261	18	CHP1	GO
GO:1903320	regulation of protein modification by small protein conjugation or removal	18/540	237/18862	0.000172047132528752	0.0168529724485942	0.0143473222798831	6737	18	TRIM21	GO
GO:1903320	regulation of protein modification by small protein conjugation or removal	18/540	237/18862	0.000172047132528752	0.0168529724485942	0.0143473222798831	85453	18	TSPYL5	GO
GO:1903320	regulation of protein modification by small protein conjugation or removal	18/540	237/18862	0.000172047132528752	0.0168529724485942	0.0143473222798831	6659	18	SOX4	GO
GO:1903320	regulation of protein modification by small protein conjugation or removal	18/540	237/18862	0.000172047132528752	0.0168529724485942	0.0143473222798831	1958	18	EGR1	GO
GO:1903320	regulation of protein modification by small protein conjugation or removal	18/540	237/18862	0.000172047132528752	0.0168529724485942	0.0143473222798831	648	18	BMI1	GO
GO:1903320	regulation of protein modification by small protein conjugation or removal	18/540	237/18862	0.000172047132528752	0.0168529724485942	0.0143473222798831	405	18	ARNT	GO
GO:1903320	regulation of protein modification by small protein conjugation or removal	18/540	237/18862	0.000172047132528752	0.0168529724485942	0.0143473222798831	10054	18	UBA2	GO
GO:1903320	regulation of protein modification by small protein conjugation or removal	18/540	237/18862	0.000172047132528752	0.0168529724485942	0.0143473222798831	9532	18	BAG2	GO
GO:0086016	AV node cell action potential	4/540	11/18862	0.000186773111861325	0.0175169335549941	0.0149125676099804	783	4	CACNB2	GO
GO:0086016	AV node cell action potential	4/540	11/18862	0.000186773111861325	0.0175169335549941	0.0149125676099804	6262	4	RYR2	GO
GO:0086016	AV node cell action potential	4/540	11/18862	0.000186773111861325	0.0175169335549941	0.0149125676099804	1525	4	CXADR	GO
GO:0086016	AV node cell action potential	4/540	11/18862	0.000186773111861325	0.0175169335549941	0.0149125676099804	6331	4	SCN5A	GO
GO:0086027	AV node cell to bundle of His cell signaling	4/540	11/18862	0.000186773111861325	0.0175169335549941	0.0149125676099804	783	4	CACNB2	GO
GO:0086027	AV node cell to bundle of His cell signaling	4/540	11/18862	0.000186773111861325	0.0175169335549941	0.0149125676099804	6262	4	RYR2	GO
GO:0086027	AV node cell to bundle of His cell signaling	4/540	11/18862	0.000186773111861325	0.0175169335549941	0.0149125676099804	1525	4	CXADR	GO
GO:0086027	AV node cell to bundle of His cell signaling	4/540	11/18862	0.000186773111861325	0.0175169335549941	0.0149125676099804	6331	4	SCN5A	GO
GO:0043414	macromolecule methylation	21/540	305/18862	0.000202334306348386	0.0185344495186109	0.0157788023053414	84193	21	SETD3	GO
GO:0043414	macromolecule methylation	21/540	305/18862	0.000202334306348386	0.0185344495186109	0.0157788023053414	1499	21	CTNNB1	GO
GO:0043414	macromolecule methylation	21/540	305/18862	0.000202334306348386	0.0185344495186109	0.0157788023053414	9589	21	WTAP	GO
GO:0043414	macromolecule methylation	21/540	305/18862	0.000202334306348386	0.0185344495186109	0.0157788023053414	55251	21	PCMTD2	GO
GO:0043414	macromolecule methylation	21/540	305/18862	0.000202334306348386	0.0185344495186109	0.0157788023053414	54904	21	NSD3	GO
GO:0043414	macromolecule methylation	21/540	305/18862	0.000202334306348386	0.0185344495186109	0.0157788023053414	8473	21	OGT	GO
GO:0043414	macromolecule methylation	21/540	305/18862	0.000202334306348386	0.0185344495186109	0.0157788023053414	1788	21	DNMT3A	GO
GO:0043414	macromolecule methylation	21/540	305/18862	0.000202334306348386	0.0185344495186109	0.0157788023053414	27292	21	DIMT1	GO
GO:0043414	macromolecule methylation	21/540	305/18862	0.000202334306348386	0.0185344495186109	0.0157788023053414	9545	21	RAB3D	GO
GO:0043414	macromolecule methylation	21/540	305/18862	0.000202334306348386	0.0185344495186109	0.0157788023053414	79977	21	GRHL2	GO
GO:0043414	macromolecule methylation	21/540	305/18862	0.000202334306348386	0.0185344495186109	0.0157788023053414	5870	21	RAB6A	GO
GO:0043414	macromolecule methylation	21/540	305/18862	0.000202334306348386	0.0185344495186109	0.0157788023053414	91646	21	TDRD12	GO
GO:0043414	macromolecule methylation	21/540	305/18862	0.000202334306348386	0.0185344495186109	0.0157788023053414	5929	21	RBBP5	GO
GO:0043414	macromolecule methylation	21/540	305/18862	0.000202334306348386	0.0185344495186109	0.0157788023053414	23512	21	SUZ12	GO
GO:0043414	macromolecule methylation	21/540	305/18862	0.000202334306348386	0.0185344495186109	0.0157788023053414	115294	21	PCMTD1	GO
GO:0043414	macromolecule methylation	21/540	305/18862	0.000202334306348386	0.0185344495186109	0.0157788023053414	57673	21	BEND3	GO
GO:0043414	macromolecule methylation	21/540	305/18862	0.000202334306348386	0.0185344495186109	0.0157788023053414	25895	21	EEF1AKMT3	GO
GO:0043414	macromolecule methylation	21/540	305/18862	0.000202334306348386	0.0185344495186109	0.0157788023053414	399818	21	EEF1AKMT2	GO
GO:0043414	macromolecule methylation	21/540	305/18862	0.000202334306348386	0.0185344495186109	0.0157788023053414	23411	21	SIRT1	GO
GO:0043414	macromolecule methylation	21/540	305/18862	0.000202334306348386	0.0185344495186109	0.0157788023053414	163589	21	TDRD5	GO
GO:0043414	macromolecule methylation	21/540	305/18862	0.000202334306348386	0.0185344495186109	0.0157788023053414	23067	21	SETD1B	GO
GO:1900024	regulation of substrate adhesion-dependent cell spreading	8/540	57/18862	0.000206031766427389	0.0185344495186109	0.0157788023053414	80005	8	DOCK5	GO
GO:1900024	regulation of substrate adhesion-dependent cell spreading	8/540	57/18862	0.000206031766427389	0.0185344495186109	0.0157788023053414	6239	8	RREB1	GO
GO:1900024	regulation of substrate adhesion-dependent cell spreading	8/540	57/18862	0.000206031766427389	0.0185344495186109	0.0157788023053414	1946	8	EFNA5	GO
GO:1900024	regulation of substrate adhesion-dependent cell spreading	8/540	57/18862	0.000206031766427389	0.0185344495186109	0.0157788023053414	55604	8	CARMIL1	GO
GO:1900024	regulation of substrate adhesion-dependent cell spreading	8/540	57/18862	0.000206031766427389	0.0185344495186109	0.0157788023053414	2192	8	FBLN1	GO
GO:1900024	regulation of substrate adhesion-dependent cell spreading	8/540	57/18862	0.000206031766427389	0.0185344495186109	0.0157788023053414	4241	8	MELTF	GO
GO:1900024	regulation of substrate adhesion-dependent cell spreading	8/540	57/18862	0.000206031766427389	0.0185344495186109	0.0157788023053414	55435	8	AP1AR	GO
GO:1900024	regulation of substrate adhesion-dependent cell spreading	8/540	57/18862	0.000206031766427389	0.0185344495186109	0.0157788023053414	91663	8	MYADM	GO
GO:0050680	negative regulation of epithelial cell proliferation	14/540	160/18862	0.000211006292596205	0.0186023147552814	0.0158365775390625	5728	14	PTEN	GO
GO:0050680	negative regulation of epithelial cell proliferation	14/540	160/18862	0.000211006292596205	0.0186023147552814	0.0158365775390625	11221	14	DUSP10	GO
GO:0050680	negative regulation of epithelial cell proliferation	14/540	160/18862	0.000211006292596205	0.0186023147552814	0.0158365775390625	7046	14	TGFBR1	GO
GO:0050680	negative regulation of epithelial cell proliferation	14/540	160/18862	0.000211006292596205	0.0186023147552814	0.0158365775390625	55294	14	FBXW7	GO
GO:0050680	negative regulation of epithelial cell proliferation	14/540	160/18862	0.000211006292596205	0.0186023147552814	0.0158365775390625	55333	14	SYNJ2BP	GO
GO:0050680	negative regulation of epithelial cell proliferation	14/540	160/18862	0.000211006292596205	0.0186023147552814	0.0158365775390625	5469	14	MED1	GO
GO:0050680	negative regulation of epithelial cell proliferation	14/540	160/18862	0.000211006292596205	0.0186023147552814	0.0158365775390625	4824	14	NKX3-1	GO
GO:0050680	negative regulation of epithelial cell proliferation	14/540	160/18862	0.000211006292596205	0.0186023147552814	0.0158365775390625	1739	14	DLG1	GO
GO:0050680	negative regulation of epithelial cell proliferation	14/540	160/18862	0.000211006292596205	0.0186023147552814	0.0158365775390625	83481	14	EPPK1	GO
GO:0050680	negative regulation of epithelial cell proliferation	14/540	160/18862	0.000211006292596205	0.0186023147552814	0.0158365775390625	23512	14	SUZ12	GO
GO:0050680	negative regulation of epithelial cell proliferation	14/540	160/18862	0.000211006292596205	0.0186023147552814	0.0158365775390625	7049	14	TGFBR3	GO
GO:0050680	negative regulation of epithelial cell proliferation	14/540	160/18862	0.000211006292596205	0.0186023147552814	0.0158365775390625	4781	14	NFIB	GO
GO:0050680	negative regulation of epithelial cell proliferation	14/540	160/18862	0.000211006292596205	0.0186023147552814	0.0158365775390625	135228	14	CD109	GO
GO:0050680	negative regulation of epithelial cell proliferation	14/540	160/18862	0.000211006292596205	0.0186023147552814	0.0158365775390625	7474	14	WNT5A	GO
GO:0071692	protein localization to extracellular region	24/540	375/18862	0.000221025657637849	0.0188469307593931	0.0160448247581518	6558	24	SLC12A2	GO
GO:0071692	protein localization to extracellular region	24/540	375/18862	0.000221025657637849	0.0188469307593931	0.0160448247581518	19	24	ABCA1	GO
GO:0071692	protein localization to extracellular region	24/540	375/18862	0.000221025657637849	0.0188469307593931	0.0160448247581518	6400	24	SEL1L	GO
GO:0071692	protein localization to extracellular region	24/540	375/18862	0.000221025657637849	0.0188469307593931	0.0160448247581518	5208	24	PFKFB2	GO
GO:0071692	protein localization to extracellular region	24/540	375/18862	0.000221025657637849	0.0188469307593931	0.0160448247581518	5530	24	PPP3CA	GO
GO:0071692	protein localization to extracellular region	24/540	375/18862	0.000221025657637849	0.0188469307593931	0.0160448247581518	7074	24	TIAM1	GO
GO:0071692	protein localization to extracellular region	24/540	375/18862	0.000221025657637849	0.0188469307593931	0.0160448247581518	23435	24	TARDBP	GO
GO:0071692	protein localization to extracellular region	24/540	375/18862	0.000221025657637849	0.0188469307593931	0.0160448247581518	4087	24	SMAD2	GO
GO:0071692	protein localization to extracellular region	24/540	375/18862	0.000221025657637849	0.0188469307593931	0.0160448247581518	382	24	ARF6	GO
GO:0071692	protein localization to extracellular region	24/540	375/18862	0.000221025657637849	0.0188469307593931	0.0160448247581518	55204	24	GOLPH3L	GO
GO:0071692	protein localization to extracellular region	24/540	375/18862	0.000221025657637849	0.0188469307593931	0.0160448247581518	9545	24	RAB3D	GO
GO:0071692	protein localization to extracellular region	24/540	375/18862	0.000221025657637849	0.0188469307593931	0.0160448247581518	387597	24	ILDR2	GO
GO:0071692	protein localization to extracellular region	24/540	375/18862	0.000221025657637849	0.0188469307593931	0.0160448247581518	22841	24	RAB11FIP2	GO
GO:0071692	protein localization to extracellular region	24/540	375/18862	0.000221025657637849	0.0188469307593931	0.0160448247581518	7430	24	EZR	GO
GO:0071692	protein localization to extracellular region	24/540	375/18862	0.000221025657637849	0.0188469307593931	0.0160448247581518	1946	24	EFNA5	GO
GO:0071692	protein localization to extracellular region	24/540	375/18862	0.000221025657637849	0.0188469307593931	0.0160448247581518	84830	24	ADTRP	GO
GO:0071692	protein localization to extracellular region	24/540	375/18862	0.000221025657637849	0.0188469307593931	0.0160448247581518	6659	24	SOX4	GO
GO:0071692	protein localization to extracellular region	24/540	375/18862	0.000221025657637849	0.0188469307593931	0.0160448247581518	2822	24	GPLD1	GO
GO:0071692	protein localization to extracellular region	24/540	375/18862	0.000221025657637849	0.0188469307593931	0.0160448247581518	9601	24	PDIA4	GO
GO:0071692	protein localization to extracellular region	24/540	375/18862	0.000221025657637849	0.0188469307593931	0.0160448247581518	388552	24	BLOC1S3	GO
GO:0071692	protein localization to extracellular region	24/540	375/18862	0.000221025657637849	0.0188469307593931	0.0160448247581518	134957	24	STXBP5	GO
GO:0071692	protein localization to extracellular region	24/540	375/18862	0.000221025657637849	0.0188469307593931	0.0160448247581518	2850	24	GPR27	GO
GO:0071692	protein localization to extracellular region	24/540	375/18862	0.000221025657637849	0.0188469307593931	0.0160448247581518	80024	24	SLC8B1	GO
GO:0071692	protein localization to extracellular region	24/540	375/18862	0.000221025657637849	0.0188469307593931	0.0160448247581518	8609	24	KLF7	GO
GO:0071383	cellular response to steroid hormone stimulus	16/540	201/18862	0.000229351427029117	0.0188469307593931	0.0160448247581518	29966	16	STRN3	GO
GO:0071383	cellular response to steroid hormone stimulus	16/540	201/18862	0.000229351427029117	0.0188469307593931	0.0160448247581518	55885	16	LMO3	GO
GO:0071383	cellular response to steroid hormone stimulus	16/540	201/18862	0.000229351427029117	0.0188469307593931	0.0160448247581518	1977	16	EIF4E	GO
GO:0071383	cellular response to steroid hormone stimulus	16/540	201/18862	0.000229351427029117	0.0188469307593931	0.0160448247581518	9125	16	CNOT9	GO
GO:0071383	cellular response to steroid hormone stimulus	16/540	201/18862	0.000229351427029117	0.0188469307593931	0.0160448247581518	27086	16	FOXP1	GO
GO:0071383	cellular response to steroid hormone stimulus	16/540	201/18862	0.000229351427029117	0.0188469307593931	0.0160448247581518	5469	16	MED1	GO
GO:0071383	cellular response to steroid hormone stimulus	16/540	201/18862	0.000229351427029117	0.0188469307593931	0.0160448247581518	865	16	CBFB	GO
GO:0071383	cellular response to steroid hormone stimulus	16/540	201/18862	0.000229351427029117	0.0188469307593931	0.0160448247581518	10521	16	DDX17	GO
GO:0071383	cellular response to steroid hormone stimulus	16/540	201/18862	0.000229351427029117	0.0188469307593931	0.0160448247581518	4824	16	NKX3-1	GO
GO:0071383	cellular response to steroid hormone stimulus	16/540	201/18862	0.000229351427029117	0.0188469307593931	0.0160448247581518	84830	16	ADTRP	GO
GO:0071383	cellular response to steroid hormone stimulus	16/540	201/18862	0.000229351427029117	0.0188469307593931	0.0160448247581518	6049	16	RNF6	GO
GO:0071383	cellular response to steroid hormone stimulus	16/540	201/18862	0.000229351427029117	0.0188469307593931	0.0160448247581518	164091	16	PAQR7	GO
GO:0071383	cellular response to steroid hormone stimulus	16/540	201/18862	0.000229351427029117	0.0188469307593931	0.0160448247581518	2235	16	FECH	GO
GO:0071383	cellular response to steroid hormone stimulus	16/540	201/18862	0.000229351427029117	0.0188469307593931	0.0160448247581518	10413	16	YAP1	GO
GO:0071383	cellular response to steroid hormone stimulus	16/540	201/18862	0.000229351427029117	0.0188469307593931	0.0160448247581518	678	16	ZFP36L2	GO
GO:0071383	cellular response to steroid hormone stimulus	16/540	201/18862	0.000229351427029117	0.0188469307593931	0.0160448247581518	23411	16	SIRT1	GO
GO:0033143	regulation of intracellular steroid hormone receptor signaling pathway	9/540	73/18862	0.000230089943928874	0.0188469307593931	0.0160448247581518	29966	9	STRN3	GO
GO:0033143	regulation of intracellular steroid hormone receptor signaling pathway	9/540	73/18862	0.000230089943928874	0.0188469307593931	0.0160448247581518	55885	9	LMO3	GO
GO:0033143	regulation of intracellular steroid hormone receptor signaling pathway	9/540	73/18862	0.000230089943928874	0.0188469307593931	0.0160448247581518	9125	9	CNOT9	GO
GO:0033143	regulation of intracellular steroid hormone receptor signaling pathway	9/540	73/18862	0.000230089943928874	0.0188469307593931	0.0160448247581518	27086	9	FOXP1	GO
GO:0033143	regulation of intracellular steroid hormone receptor signaling pathway	9/540	73/18862	0.000230089943928874	0.0188469307593931	0.0160448247581518	5469	9	MED1	GO
GO:0033143	regulation of intracellular steroid hormone receptor signaling pathway	9/540	73/18862	0.000230089943928874	0.0188469307593931	0.0160448247581518	865	9	CBFB	GO
GO:0033143	regulation of intracellular steroid hormone receptor signaling pathway	9/540	73/18862	0.000230089943928874	0.0188469307593931	0.0160448247581518	6049	9	RNF6	GO
GO:0033143	regulation of intracellular steroid hormone receptor signaling pathway	9/540	73/18862	0.000230089943928874	0.0188469307593931	0.0160448247581518	10413	9	YAP1	GO
GO:0033143	regulation of intracellular steroid hormone receptor signaling pathway	9/540	73/18862	0.000230089943928874	0.0188469307593931	0.0160448247581518	23411	9	SIRT1	GO
GO:0043409	negative regulation of MAPK cascade	15/540	181/18862	0.000230883453041567	0.0188469307593931	0.0160448247581518	5728	15	PTEN	GO
GO:0043409	negative regulation of MAPK cascade	15/540	181/18862	0.000230883453041567	0.0188469307593931	0.0160448247581518	11221	15	DUSP10	GO
GO:0043409	negative regulation of MAPK cascade	15/540	181/18862	0.000230883453041567	0.0188469307593931	0.0160448247581518	55885	15	LMO3	GO
GO:0043409	negative regulation of MAPK cascade	15/540	181/18862	0.000230883453041567	0.0188469307593931	0.0160448247581518	3480	15	IGF1R	GO
GO:0043409	negative regulation of MAPK cascade	15/540	181/18862	0.000230883453041567	0.0188469307593931	0.0160448247581518	27250	15	PDCD4	GO
GO:0043409	negative regulation of MAPK cascade	15/540	181/18862	0.000230883453041567	0.0188469307593931	0.0160448247581518	201163	15	FLCN	GO
GO:0043409	negative regulation of MAPK cascade	15/540	181/18862	0.000230883453041567	0.0188469307593931	0.0160448247581518	55333	15	SYNJ2BP	GO
GO:0043409	negative regulation of MAPK cascade	15/540	181/18862	0.000230883453041567	0.0188469307593931	0.0160448247581518	7430	15	EZR	GO
GO:0043409	negative regulation of MAPK cascade	15/540	181/18862	0.000230883453041567	0.0188469307593931	0.0160448247581518	1739	15	DLG1	GO
GO:0043409	negative regulation of MAPK cascade	15/540	181/18862	0.000230883453041567	0.0188469307593931	0.0160448247581518	1849	15	DUSP7	GO
GO:0043409	negative regulation of MAPK cascade	15/540	181/18862	0.000230883453041567	0.0188469307593931	0.0160448247581518	10114	15	HIPK3	GO
GO:0043409	negative regulation of MAPK cascade	15/540	181/18862	0.000230883453041567	0.0188469307593931	0.0160448247581518	10019	15	SH2B3	GO
GO:0043409	negative regulation of MAPK cascade	15/540	181/18862	0.000230883453041567	0.0188469307593931	0.0160448247581518	2192	15	FBLN1	GO
GO:0043409	negative regulation of MAPK cascade	15/540	181/18862	0.000230883453041567	0.0188469307593931	0.0160448247581518	65268	15	WNK2	GO
GO:0043409	negative regulation of MAPK cascade	15/540	181/18862	0.000230883453041567	0.0188469307593931	0.0160448247581518	1848	15	DUSP6	GO
GO:0061045	negative regulation of wound healing	9/540	74/18862	0.000255415555887599	0.0199028705562629	0.0169437705447218	6558	9	SLC12A2	GO
GO:0061045	negative regulation of wound healing	9/540	74/18862	0.000255415555887599	0.0199028705562629	0.0169437705447218	5728	9	PTEN	GO
GO:0061045	negative regulation of wound healing	9/540	74/18862	0.000255415555887599	0.0199028705562629	0.0169437705447218	5154	9	PDGFA	GO
GO:0061045	negative regulation of wound healing	9/540	74/18862	0.000255415555887599	0.0199028705562629	0.0169437705447218	84830	9	ADTRP	GO
GO:0061045	negative regulation of wound healing	9/540	74/18862	0.000255415555887599	0.0199028705562629	0.0169437705447218	4088	9	SMAD3	GO
GO:0061045	negative regulation of wound healing	9/540	74/18862	0.000255415555887599	0.0199028705562629	0.0169437705447218	5270	9	SERPINE2	GO
GO:0061045	negative regulation of wound healing	9/540	74/18862	0.000255415555887599	0.0199028705562629	0.0169437705447218	83481	9	EPPK1	GO
GO:0061045	negative regulation of wound healing	9/540	74/18862	0.000255415555887599	0.0199028705562629	0.0169437705447218	10019	9	SH2B3	GO
GO:0061045	negative regulation of wound healing	9/540	74/18862	0.000255415555887599	0.0199028705562629	0.0169437705447218	135228	9	CD109	GO
GO:0030324	lung development	14/540	163/18862	0.000255978036632893	0.0199028705562629	0.0169437705447218	6431	14	SRSF6	GO
GO:0030324	lung development	14/540	163/18862	0.000255978036632893	0.0199028705562629	0.0169437705447218	5154	14	PDGFA	GO
GO:0030324	lung development	14/540	163/18862	0.000255978036632893	0.0199028705562629	0.0169437705447218	1977	14	EIF4E	GO
GO:0030324	lung development	14/540	163/18862	0.000255978036632893	0.0199028705562629	0.0169437705447218	4087	14	SMAD2	GO
GO:0030324	lung development	14/540	163/18862	0.000255978036632893	0.0199028705562629	0.0169437705447218	2254	14	FGF9	GO
GO:0030324	lung development	14/540	163/18862	0.000255978036632893	0.0199028705562629	0.0169437705447218	55294	14	FBXW7	GO
GO:0030324	lung development	14/540	163/18862	0.000255978036632893	0.0199028705562629	0.0169437705447218	10427	14	SEC24B	GO
GO:0030324	lung development	14/540	163/18862	0.000255978036632893	0.0199028705562629	0.0169437705447218	83716	14	CRISPLD2	GO
GO:0030324	lung development	14/540	163/18862	0.000255978036632893	0.0199028705562629	0.0169437705447218	79977	14	GRHL2	GO
GO:0030324	lung development	14/540	163/18862	0.000255978036632893	0.0199028705562629	0.0169437705447218	10413	14	YAP1	GO
GO:0030324	lung development	14/540	163/18862	0.000255978036632893	0.0199028705562629	0.0169437705447218	157506	14	RDH10	GO
GO:0030324	lung development	14/540	163/18862	0.000255978036632893	0.0199028705562629	0.0169437705447218	4781	14	NFIB	GO
GO:0030324	lung development	14/540	163/18862	0.000255978036632893	0.0199028705562629	0.0169437705447218	5594	14	MAPK1	GO
GO:0030324	lung development	14/540	163/18862	0.000255978036632893	0.0199028705562629	0.0169437705447218	7474	14	WNT5A	GO
GO:0098751	bone cell development	6/540	32/18862	0.000257364705468916	0.0199028705562629	0.0169437705447218	55294	6	FBXW7	GO
GO:0098751	bone cell development	6/540	32/18862	0.000257364705468916	0.0199028705562629	0.0169437705447218	27086	6	FOXP1	GO
GO:0098751	bone cell development	6/540	32/18862	0.000257364705468916	0.0199028705562629	0.0169437705447218	10163	6	WASF2	GO
GO:0098751	bone cell development	6/540	32/18862	0.000257364705468916	0.0199028705562629	0.0169437705447218	5469	6	MED1	GO
GO:0098751	bone cell development	6/540	32/18862	0.000257364705468916	0.0199028705562629	0.0169437705447218	5305	6	PIP4K2A	GO
GO:0098751	bone cell development	6/540	32/18862	0.000257364705468916	0.0199028705562629	0.0169437705447218	10019	6	SH2B3	GO
GO:0086067	AV node cell to bundle of His cell communication	4/540	12/18862	0.000273831242205453	0.0207166957101654	0.0176365985783599	783	4	CACNB2	GO
GO:0086067	AV node cell to bundle of His cell communication	4/540	12/18862	0.000273831242205453	0.0207166957101654	0.0176365985783599	6262	4	RYR2	GO
GO:0086067	AV node cell to bundle of His cell communication	4/540	12/18862	0.000273831242205453	0.0207166957101654	0.0176365985783599	1525	4	CXADR	GO
GO:0086067	AV node cell to bundle of His cell communication	4/540	12/18862	0.000273831242205453	0.0207166957101654	0.0176365985783599	6331	4	SCN5A	GO
GO:0043484	regulation of RNA splicing	13/540	145/18862	0.000277287896302123	0.0207166957101654	0.0176365985783599	58155	13	PTBP2	GO
GO:0043484	regulation of RNA splicing	13/540	145/18862	0.000277287896302123	0.0207166957101654	0.0176365985783599	29896	13	TRA2A	GO
GO:0043484	regulation of RNA splicing	13/540	145/18862	0.000277287896302123	0.0207166957101654	0.0176365985783599	3187	13	HNRNPH1	GO
GO:0043484	regulation of RNA splicing	13/540	145/18862	0.000277287896302123	0.0207166957101654	0.0176365985783599	9589	13	WTAP	GO
GO:0043484	regulation of RNA splicing	13/540	145/18862	0.000277287896302123	0.0207166957101654	0.0176365985783599	6431	13	SRSF6	GO
GO:0043484	regulation of RNA splicing	13/540	145/18862	0.000277287896302123	0.0207166957101654	0.0176365985783599	2332	13	FMR1	GO
GO:0043484	regulation of RNA splicing	13/540	145/18862	0.000277287896302123	0.0207166957101654	0.0176365985783599	1195	13	CLK1	GO
GO:0043484	regulation of RNA splicing	13/540	145/18862	0.000277287896302123	0.0207166957101654	0.0176365985783599	6428	13	SRSF3	GO
GO:0043484	regulation of RNA splicing	13/540	145/18862	0.000277287896302123	0.0207166957101654	0.0176365985783599	10521	13	DDX17	GO
GO:0043484	regulation of RNA splicing	13/540	145/18862	0.000277287896302123	0.0207166957101654	0.0176365985783599	8087	13	FXR1	GO
GO:0043484	regulation of RNA splicing	13/540	145/18862	0.000277287896302123	0.0207166957101654	0.0176365985783599	3191	13	HNRNPL	GO
GO:0043484	regulation of RNA splicing	13/540	145/18862	0.000277287896302123	0.0207166957101654	0.0176365985783599	7072	13	TIA1	GO
GO:0043484	regulation of RNA splicing	13/540	145/18862	0.000277287896302123	0.0207166957101654	0.0176365985783599	92906	13	HNRNPLL	GO
GO:0051896	regulation of protein kinase B signaling	18/540	247/18862	0.000286129987138598	0.0209205922459223	0.0178101803793851	9530	18	BAG4	GO
GO:0051896	regulation of protein kinase B signaling	18/540	247/18862	0.000286129987138598	0.0209205922459223	0.0178101803793851	5728	18	PTEN	GO
GO:0051896	regulation of protein kinase B signaling	18/540	247/18862	0.000286129987138598	0.0209205922459223	0.0178101803793851	253260	18	RICTOR	GO
GO:0051896	regulation of protein kinase B signaling	18/540	247/18862	0.000286129987138598	0.0209205922459223	0.0178101803793851	7046	18	TGFBR1	GO
GO:0051896	regulation of protein kinase B signaling	18/540	247/18862	0.000286129987138598	0.0209205922459223	0.0178101803793851	5154	18	PDGFA	GO
GO:0051896	regulation of protein kinase B signaling	18/540	247/18862	0.000286129987138598	0.0209205922459223	0.0178101803793851	2254	18	FGF9	GO
GO:0051896	regulation of protein kinase B signaling	18/540	247/18862	0.000286129987138598	0.0209205922459223	0.0178101803793851	143686	18	SESN3	GO
GO:0051896	regulation of protein kinase B signaling	18/540	247/18862	0.000286129987138598	0.0209205922459223	0.0178101803793851	3480	18	IGF1R	GO
GO:0051896	regulation of protein kinase B signaling	18/540	247/18862	0.000286129987138598	0.0209205922459223	0.0178101803793851	201163	18	FLCN	GO
GO:0051896	regulation of protein kinase B signaling	18/540	247/18862	0.000286129987138598	0.0209205922459223	0.0178101803793851	5527	18	PPP2R5C	GO
GO:0051896	regulation of protein kinase B signaling	18/540	247/18862	0.000286129987138598	0.0209205922459223	0.0178101803793851	1739	18	DLG1	GO
GO:0051896	regulation of protein kinase B signaling	18/540	247/18862	0.000286129987138598	0.0209205922459223	0.0178101803793851	59338	18	PLEKHA1	GO
GO:0051896	regulation of protein kinase B signaling	18/540	247/18862	0.000286129987138598	0.0209205922459223	0.0178101803793851	85453	18	TSPYL5	GO
GO:0051896	regulation of protein kinase B signaling	18/540	247/18862	0.000286129987138598	0.0209205922459223	0.0178101803793851	10019	18	SH2B3	GO
GO:0051896	regulation of protein kinase B signaling	18/540	247/18862	0.000286129987138598	0.0209205922459223	0.0178101803793851	3643	18	INSR	GO
GO:0051896	regulation of protein kinase B signaling	18/540	247/18862	0.000286129987138598	0.0209205922459223	0.0178101803793851	23035	18	PHLPP2	GO
GO:0051896	regulation of protein kinase B signaling	18/540	247/18862	0.000286129987138598	0.0209205922459223	0.0178101803793851	2885	18	GRB2	GO
GO:0051896	regulation of protein kinase B signaling	18/540	247/18862	0.000286129987138598	0.0209205922459223	0.0178101803793851	23411	18	SIRT1	GO
GO:0032869	cellular response to insulin stimulus	17/540	226/18862	0.000289509103221702	0.0209205922459223	0.0178101803793851	5728	17	PTEN	GO
GO:0032869	cellular response to insulin stimulus	17/540	226/18862	0.000289509103221702	0.0209205922459223	0.0178101803793851	8473	17	OGT	GO
GO:0032869	cellular response to insulin stimulus	17/540	226/18862	0.000289509103221702	0.0209205922459223	0.0178101803793851	143686	17	SESN3	GO
GO:0032869	cellular response to insulin stimulus	17/540	226/18862	0.000289509103221702	0.0209205922459223	0.0178101803793851	3480	17	IGF1R	GO
GO:0032869	cellular response to insulin stimulus	17/540	226/18862	0.000289509103221702	0.0209205922459223	0.0178101803793851	64506	17	CPEB1	GO
GO:0032869	cellular response to insulin stimulus	17/540	226/18862	0.000289509103221702	0.0209205922459223	0.0178101803793851	5305	17	PIP4K2A	GO
GO:0032869	cellular response to insulin stimulus	17/540	226/18862	0.000289509103221702	0.0209205922459223	0.0178101803793851	5315	17	PKM	GO
GO:0032869	cellular response to insulin stimulus	17/540	226/18862	0.000289509103221702	0.0209205922459223	0.0178101803793851	2822	17	GPLD1	GO
GO:0032869	cellular response to insulin stimulus	17/540	226/18862	0.000289509103221702	0.0209205922459223	0.0178101803793851	6667	17	SP1	GO
GO:0032869	cellular response to insulin stimulus	17/540	226/18862	0.000289509103221702	0.0209205922459223	0.0178101803793851	2241	17	FER	GO
GO:0032869	cellular response to insulin stimulus	17/540	226/18862	0.000289509103221702	0.0209205922459223	0.0178101803793851	3643	17	INSR	GO
GO:0032869	cellular response to insulin stimulus	17/540	226/18862	0.000289509103221702	0.0209205922459223	0.0178101803793851	23433	17	RHOQ	GO
GO:0032869	cellular response to insulin stimulus	17/540	226/18862	0.000289509103221702	0.0209205922459223	0.0178101803793851	2885	17	GRB2	GO
GO:0032869	cellular response to insulin stimulus	17/540	226/18862	0.000289509103221702	0.0209205922459223	0.0178101803793851	23411	17	SIRT1	GO
GO:0032869	cellular response to insulin stimulus	17/540	226/18862	0.000289509103221702	0.0209205922459223	0.0178101803793851	4641	17	MYO1C	GO
GO:0032869	cellular response to insulin stimulus	17/540	226/18862	0.000289509103221702	0.0209205922459223	0.0178101803793851	10014	17	HDAC5	GO
GO:0032869	cellular response to insulin stimulus	17/540	226/18862	0.000289509103221702	0.0209205922459223	0.0178101803793851	140710	17	SOGA1	GO
GO:0007265	Ras protein signal transduction	22/540	338/18862	0.000316784091757001	0.0225223270397558	0.0191737739747658	56990	22	CDC42SE2	GO
GO:0007265	Ras protein signal transduction	22/540	338/18862	0.000316784091757001	0.0225223270397558	0.0191737739747658	5912	22	RAP2B	GO
GO:0007265	Ras protein signal transduction	22/540	338/18862	0.000316784091757001	0.0225223270397558	0.0191737739747658	19	22	ABCA1	GO
GO:0007265	Ras protein signal transduction	22/540	338/18862	0.000316784091757001	0.0225223270397558	0.0191737739747658	7074	22	TIAM1	GO
GO:0007265	Ras protein signal transduction	22/540	338/18862	0.000316784091757001	0.0225223270397558	0.0191737739747658	8473	22	OGT	GO
GO:0007265	Ras protein signal transduction	22/540	338/18862	0.000316784091757001	0.0225223270397558	0.0191737739747658	6239	22	RREB1	GO
GO:0007265	Ras protein signal transduction	22/540	338/18862	0.000316784091757001	0.0225223270397558	0.0191737739747658	382	22	ARF6	GO
GO:0007265	Ras protein signal transduction	22/540	338/18862	0.000316784091757001	0.0225223270397558	0.0191737739747658	5962	22	RDX	GO
GO:0007265	Ras protein signal transduction	22/540	338/18862	0.000316784091757001	0.0225223270397558	0.0191737739747658	3837	22	KPNB1	GO
GO:0007265	Ras protein signal transduction	22/540	338/18862	0.000316784091757001	0.0225223270397558	0.0191737739747658	83452	22	RAB33B	GO
GO:0007265	Ras protein signal transduction	22/540	338/18862	0.000316784091757001	0.0225223270397558	0.0191737739747658	128239	22	IQGAP3	GO
GO:0007265	Ras protein signal transduction	22/540	338/18862	0.000316784091757001	0.0225223270397558	0.0191737739747658	201163	22	FLCN	GO
GO:0007265	Ras protein signal transduction	22/540	338/18862	0.000316784091757001	0.0225223270397558	0.0191737739747658	10163	22	WASF2	GO
GO:0007265	Ras protein signal transduction	22/540	338/18862	0.000316784091757001	0.0225223270397558	0.0191737739747658	392	22	ARHGAP1	GO
GO:0007265	Ras protein signal transduction	22/540	338/18862	0.000316784091757001	0.0225223270397558	0.0191737739747658	57826	22	RAP2C	GO
GO:0007265	Ras protein signal transduction	22/540	338/18862	0.000316784091757001	0.0225223270397558	0.0191737739747658	11188	22	NISCH	GO
GO:0007265	Ras protein signal transduction	22/540	338/18862	0.000316784091757001	0.0225223270397558	0.0191737739747658	7157	22	TP53	GO
GO:0007265	Ras protein signal transduction	22/540	338/18862	0.000316784091757001	0.0225223270397558	0.0191737739747658	23011	22	RAB21	GO
GO:0007265	Ras protein signal transduction	22/540	338/18862	0.000316784091757001	0.0225223270397558	0.0191737739747658	9265	22	CYTH3	GO
GO:0007265	Ras protein signal transduction	22/540	338/18862	0.000316784091757001	0.0225223270397558	0.0191737739747658	2885	22	GRB2	GO
GO:0007265	Ras protein signal transduction	22/540	338/18862	0.000316784091757001	0.0225223270397558	0.0191737739747658	9367	22	RAB9A	GO
GO:0007265	Ras protein signal transduction	22/540	338/18862	0.000316784091757001	0.0225223270397558	0.0191737739747658	4650	22	MYO9B	GO
GO:0010498	proteasomal protein catabolic process	28/540	483/18862	0.000351477285385204	0.0245922519679044	0.0209359485780827	1452	28	CSNK1A1	GO
GO:0010498	proteasomal protein catabolic process	28/540	483/18862	0.000351477285385204	0.0245922519679044	0.0209359485780827	1499	28	CTNNB1	GO
GO:0010498	proteasomal protein catabolic process	28/540	483/18862	0.000351477285385204	0.0245922519679044	0.0209359485780827	6400	28	SEL1L	GO
GO:0010498	proteasomal protein catabolic process	28/540	483/18862	0.000351477285385204	0.0245922519679044	0.0209359485780827	8473	28	OGT	GO
GO:0010498	proteasomal protein catabolic process	28/540	483/18862	0.000351477285385204	0.0245922519679044	0.0209359485780827	79718	28	TBL1XR1	GO
GO:0010498	proteasomal protein catabolic process	28/540	483/18862	0.000351477285385204	0.0245922519679044	0.0209359485780827	7326	28	UBE2G1	GO
GO:0010498	proteasomal protein catabolic process	28/540	483/18862	0.000351477285385204	0.0245922519679044	0.0209359485780827	2332	28	FMR1	GO
GO:0010498	proteasomal protein catabolic process	28/540	483/18862	0.000351477285385204	0.0245922519679044	0.0209359485780827	160418	28	TMTC3	GO
GO:0010498	proteasomal protein catabolic process	28/540	483/18862	0.000351477285385204	0.0245922519679044	0.0209359485780827	55294	28	FBXW7	GO
GO:0010498	proteasomal protein catabolic process	28/540	483/18862	0.000351477285385204	0.0245922519679044	0.0209359485780827	51283	28	BFAR	GO
GO:0010498	proteasomal protein catabolic process	28/540	483/18862	0.000351477285385204	0.0245922519679044	0.0209359485780827	79845	28	RNF122	GO
GO:0010498	proteasomal protein catabolic process	28/540	483/18862	0.000351477285385204	0.0245922519679044	0.0209359485780827	255488	28	RNF144B	GO
GO:0010498	proteasomal protein catabolic process	28/540	483/18862	0.000351477285385204	0.0245922519679044	0.0209359485780827	9354	28	UBE4A	GO
GO:0010498	proteasomal protein catabolic process	28/540	483/18862	0.000351477285385204	0.0245922519679044	0.0209359485780827	51009	28	DERL2	GO
GO:0010498	proteasomal protein catabolic process	28/540	483/18862	0.000351477285385204	0.0245922519679044	0.0209359485780827	7993	28	UBXN8	GO
GO:0010498	proteasomal protein catabolic process	28/540	483/18862	0.000351477285385204	0.0245922519679044	0.0209359485780827	387921	28	NHLRC3	GO
GO:0010498	proteasomal protein catabolic process	28/540	483/18862	0.000351477285385204	0.0245922519679044	0.0209359485780827	5527	28	PPP2R5C	GO
GO:0010498	proteasomal protein catabolic process	28/540	483/18862	0.000351477285385204	0.0245922519679044	0.0209359485780827	55432	28	YOD1	GO
GO:0010498	proteasomal protein catabolic process	28/540	483/18862	0.000351477285385204	0.0245922519679044	0.0209359485780827	5720	28	PSME1	GO
GO:0010498	proteasomal protein catabolic process	28/540	483/18862	0.000351477285385204	0.0245922519679044	0.0209359485780827	117584	28	RFFL	GO
GO:0010498	proteasomal protein catabolic process	28/540	483/18862	0.000351477285385204	0.0245922519679044	0.0209359485780827	5692	28	PSMB4	GO
GO:0010498	proteasomal protein catabolic process	28/540	483/18862	0.000351477285385204	0.0245922519679044	0.0209359485780827	56893	28	UBQLN4	GO
GO:0010498	proteasomal protein catabolic process	28/540	483/18862	0.000351477285385204	0.0245922519679044	0.0209359485780827	5887	28	RAD23B	GO
GO:0010498	proteasomal protein catabolic process	28/540	483/18862	0.000351477285385204	0.0245922519679044	0.0209359485780827	55666	28	NPLOC4	GO
GO:0010498	proteasomal protein catabolic process	28/540	483/18862	0.000351477285385204	0.0245922519679044	0.0209359485780827	9695	28	EDEM1	GO
GO:0010498	proteasomal protein catabolic process	28/540	483/18862	0.000351477285385204	0.0245922519679044	0.0209359485780827	23411	28	SIRT1	GO
GO:0010498	proteasomal protein catabolic process	28/540	483/18862	0.000351477285385204	0.0245922519679044	0.0209359485780827	29978	28	UBQLN2	GO
GO:0010498	proteasomal protein catabolic process	28/540	483/18862	0.000351477285385204	0.0245922519679044	0.0209359485780827	9532	28	BAG2	GO
GO:0051443	positive regulation of ubiquitin-protein transferase activity	6/540	34/18862	0.000363885600017536	0.0250626207012078	0.021336384277344	5728	6	PTEN	GO
GO:0051443	positive regulation of ubiquitin-protein transferase activity	6/540	34/18862	0.000363885600017536	0.0250626207012078	0.021336384277344	54165	6	DCUN1D1	GO
GO:0051443	positive regulation of ubiquitin-protein transferase activity	6/540	34/18862	0.000363885600017536	0.0250626207012078	0.021336384277344	23142	6	DCUN1D4	GO
GO:0051443	positive regulation of ubiquitin-protein transferase activity	6/540	34/18862	0.000363885600017536	0.0250626207012078	0.021336384277344	55294	6	FBXW7	GO
GO:0051443	positive regulation of ubiquitin-protein transferase activity	6/540	34/18862	0.000363885600017536	0.0250626207012078	0.021336384277344	57561	6	ARRDC3	GO
GO:0051443	positive regulation of ubiquitin-protein transferase activity	6/540	34/18862	0.000363885600017536	0.0250626207012078	0.021336384277344	648	6	BMI1	GO
GO:0051898	negative regulation of protein kinase B signaling	8/540	62/18862	0.000372051307332675	0.025230802503422	0.0214795613059269	5728	8	PTEN	GO
GO:0051898	negative regulation of protein kinase B signaling	8/540	62/18862	0.000372051307332675	0.025230802503422	0.0214795613059269	201163	8	FLCN	GO
GO:0051898	negative regulation of protein kinase B signaling	8/540	62/18862	0.000372051307332675	0.025230802503422	0.0214795613059269	5527	8	PPP2R5C	GO
GO:0051898	negative regulation of protein kinase B signaling	8/540	62/18862	0.000372051307332675	0.025230802503422	0.0214795613059269	1739	8	DLG1	GO
GO:0051898	negative regulation of protein kinase B signaling	8/540	62/18862	0.000372051307332675	0.025230802503422	0.0214795613059269	59338	8	PLEKHA1	GO
GO:0051898	negative regulation of protein kinase B signaling	8/540	62/18862	0.000372051307332675	0.025230802503422	0.0214795613059269	10019	8	SH2B3	GO
GO:0051898	negative regulation of protein kinase B signaling	8/540	62/18862	0.000372051307332675	0.025230802503422	0.0214795613059269	23035	8	PHLPP2	GO
GO:0051898	negative regulation of protein kinase B signaling	8/540	62/18862	0.000372051307332675	0.025230802503422	0.0214795613059269	23411	8	SIRT1	GO
GO:0030518	intracellular steroid hormone receptor signaling pathway	11/540	113/18862	0.00039916968536423	0.0261468506121305	0.0222594140873639	29966	11	STRN3	GO
GO:0030518	intracellular steroid hormone receptor signaling pathway	11/540	113/18862	0.00039916968536423	0.0261468506121305	0.0222594140873639	55885	11	LMO3	GO
GO:0030518	intracellular steroid hormone receptor signaling pathway	11/540	113/18862	0.00039916968536423	0.0261468506121305	0.0222594140873639	9125	11	CNOT9	GO
GO:0030518	intracellular steroid hormone receptor signaling pathway	11/540	113/18862	0.00039916968536423	0.0261468506121305	0.0222594140873639	27086	11	FOXP1	GO
GO:0030518	intracellular steroid hormone receptor signaling pathway	11/540	113/18862	0.00039916968536423	0.0261468506121305	0.0222594140873639	5469	11	MED1	GO
GO:0030518	intracellular steroid hormone receptor signaling pathway	11/540	113/18862	0.00039916968536423	0.0261468506121305	0.0222594140873639	865	11	CBFB	GO
GO:0030518	intracellular steroid hormone receptor signaling pathway	11/540	113/18862	0.00039916968536423	0.0261468506121305	0.0222594140873639	10521	11	DDX17	GO
GO:0030518	intracellular steroid hormone receptor signaling pathway	11/540	113/18862	0.00039916968536423	0.0261468506121305	0.0222594140873639	4824	11	NKX3-1	GO
GO:0030518	intracellular steroid hormone receptor signaling pathway	11/540	113/18862	0.00039916968536423	0.0261468506121305	0.0222594140873639	6049	11	RNF6	GO
GO:0030518	intracellular steroid hormone receptor signaling pathway	11/540	113/18862	0.00039916968536423	0.0261468506121305	0.0222594140873639	10413	11	YAP1	GO
GO:0030518	intracellular steroid hormone receptor signaling pathway	11/540	113/18862	0.00039916968536423	0.0261468506121305	0.0222594140873639	23411	11	SIRT1	GO
GO:0031334	positive regulation of protein-containing complex assembly	18/540	254/18862	0.00040087289491346	0.0261468506121305	0.0222594140873639	9530	18	BAG4	GO
GO:0031334	positive regulation of protein-containing complex assembly	18/540	254/18862	0.00040087289491346	0.0261468506121305	0.0222594140873639	96459	18	FNIP1	GO
GO:0031334	positive regulation of protein-containing complex assembly	18/540	254/18862	0.00040087289491346	0.0261468506121305	0.0222594140873639	19	18	ABCA1	GO
GO:0031334	positive regulation of protein-containing complex assembly	18/540	254/18862	0.00040087289491346	0.0261468506121305	0.0222594140873639	253260	18	RICTOR	GO
GO:0031334	positive regulation of protein-containing complex assembly	18/540	254/18862	0.00040087289491346	0.0261468506121305	0.0222594140873639	382	18	ARF6	GO
GO:0031334	positive regulation of protein-containing complex assembly	18/540	254/18862	0.00040087289491346	0.0261468506121305	0.0222594140873639	10163	18	WASF2	GO
GO:0031334	positive regulation of protein-containing complex assembly	18/540	254/18862	0.00040087289491346	0.0261468506121305	0.0222594140873639	55604	18	CARMIL1	GO
GO:0031334	positive regulation of protein-containing complex assembly	18/540	254/18862	0.00040087289491346	0.0261468506121305	0.0222594140873639	1739	18	DLG1	GO
GO:0031334	positive regulation of protein-containing complex assembly	18/540	254/18862	0.00040087289491346	0.0261468506121305	0.0222594140873639	7157	18	TP53	GO
GO:0031334	positive regulation of protein-containing complex assembly	18/540	254/18862	0.00040087289491346	0.0261468506121305	0.0222594140873639	2241	18	FER	GO
GO:0031334	positive regulation of protein-containing complex assembly	18/540	254/18862	0.00040087289491346	0.0261468506121305	0.0222594140873639	10093	18	ARPC4	GO
GO:0031334	positive regulation of protein-containing complex assembly	18/540	254/18862	0.00040087289491346	0.0261468506121305	0.0222594140873639	2017	18	CTTN	GO
GO:0031334	positive regulation of protein-containing complex assembly	18/540	254/18862	0.00040087289491346	0.0261468506121305	0.0222594140873639	4131	18	MAP1B	GO
GO:0031334	positive regulation of protein-containing complex assembly	18/540	254/18862	0.00040087289491346	0.0261468506121305	0.0222594140873639	1639	18	DCTN1	GO
GO:0031334	positive regulation of protein-containing complex assembly	18/540	254/18862	0.00040087289491346	0.0261468506121305	0.0222594140873639	2885	18	GRB2	GO
GO:0031334	positive regulation of protein-containing complex assembly	18/540	254/18862	0.00040087289491346	0.0261468506121305	0.0222594140873639	56203	18	LMOD3	GO
GO:0031334	positive regulation of protein-containing complex assembly	18/540	254/18862	0.00040087289491346	0.0261468506121305	0.0222594140873639	4641	18	MYO1C	GO
GO:0031334	positive regulation of protein-containing complex assembly	18/540	254/18862	0.00040087289491346	0.0261468506121305	0.0222594140873639	55435	18	AP1AR	GO
GO:0060425	lung morphogenesis	7/540	48/18862	0.000403354319787857	0.0261468506121305	0.0222594140873639	6431	7	SRSF6	GO
GO:0060425	lung morphogenesis	7/540	48/18862	0.000403354319787857	0.0261468506121305	0.0222594140873639	10427	7	SEC24B	GO
GO:0060425	lung morphogenesis	7/540	48/18862	0.000403354319787857	0.0261468506121305	0.0222594140873639	79977	7	GRHL2	GO
GO:0060425	lung morphogenesis	7/540	48/18862	0.000403354319787857	0.0261468506121305	0.0222594140873639	10413	7	YAP1	GO
GO:0060425	lung morphogenesis	7/540	48/18862	0.000403354319787857	0.0261468506121305	0.0222594140873639	157506	7	RDH10	GO
GO:0060425	lung morphogenesis	7/540	48/18862	0.000403354319787857	0.0261468506121305	0.0222594140873639	4781	7	NFIB	GO
GO:0060425	lung morphogenesis	7/540	48/18862	0.000403354319787857	0.0261468506121305	0.0222594140873639	5594	7	MAPK1	GO
GO:0008406	gonad development	16/540	212/18862	0.000416945715305693	0.026636184247355	0.0226759950429412	92	16	ACVR2A	GO
GO:0008406	gonad development	16/540	212/18862	0.000416945715305693	0.026636184247355	0.0226759950429412	7543	16	ZFX	GO
GO:0008406	gonad development	16/540	212/18862	0.000416945715305693	0.026636184247355	0.0226759950429412	7046	16	TGFBR1	GO
GO:0008406	gonad development	16/540	212/18862	0.000416945715305693	0.026636184247355	0.0226759950429412	2254	16	FGF9	GO
GO:0008406	gonad development	16/540	212/18862	0.000416945715305693	0.026636184247355	0.0226759950429412	658	16	BMPR1B	GO
GO:0008406	gonad development	16/540	212/18862	0.000416945715305693	0.026636184247355	0.0226759950429412	3157	16	HMGCS1	GO
GO:0008406	gonad development	16/540	212/18862	0.000416945715305693	0.026636184247355	0.0226759950429412	4824	16	NKX3-1	GO
GO:0008406	gonad development	16/540	212/18862	0.000416945715305693	0.026636184247355	0.0226759950429412	9468	16	PCYT1B	GO
GO:0008406	gonad development	16/540	212/18862	0.000416945715305693	0.026636184247355	0.0226759950429412	59338	16	PLEKHA1	GO
GO:0008406	gonad development	16/540	212/18862	0.000416945715305693	0.026636184247355	0.0226759950429412	835	16	CASP2	GO
GO:0008406	gonad development	16/540	212/18862	0.000416945715305693	0.026636184247355	0.0226759950429412	431707	16	LHX8	GO
GO:0008406	gonad development	16/540	212/18862	0.000416945715305693	0.026636184247355	0.0226759950429412	157506	16	RDH10	GO
GO:0008406	gonad development	16/540	212/18862	0.000416945715305693	0.026636184247355	0.0226759950429412	23411	16	SIRT1	GO
GO:0008406	gonad development	16/540	212/18862	0.000416945715305693	0.026636184247355	0.0226759950429412	4257	16	MGST1	GO
GO:0008406	gonad development	16/540	212/18862	0.000416945715305693	0.026636184247355	0.0226759950429412	7022	16	TFAP2C	GO
GO:0008406	gonad development	16/540	212/18862	0.000416945715305693	0.026636184247355	0.0226759950429412	7474	16	WNT5A	GO
GO:0007050	cell cycle arrest	17/540	235/18862	0.000455127863471496	0.0286600517454622	0.0243989598988854	6498	17	SKIL	GO
GO:0007050	cell cycle arrest	17/540	235/18862	0.000455127863471496	0.0286600517454622	0.0243989598988854	7046	17	TGFBR1	GO
GO:0007050	cell cycle arrest	17/540	235/18862	0.000455127863471496	0.0286600517454622	0.0243989598988854	580	17	BARD1	GO
GO:0007050	cell cycle arrest	17/540	235/18862	0.000455127863471496	0.0286600517454622	0.0243989598988854	102	17	ADAM10	GO
GO:0007050	cell cycle arrest	17/540	235/18862	0.000455127863471496	0.0286600517454622	0.0243989598988854	5325	17	PLAGL1	GO
GO:0007050	cell cycle arrest	17/540	235/18862	0.000455127863471496	0.0286600517454622	0.0243989598988854	9125	17	CNOT9	GO
GO:0007050	cell cycle arrest	17/540	235/18862	0.000455127863471496	0.0286600517454622	0.0243989598988854	4824	17	NKX3-1	GO
GO:0007050	cell cycle arrest	17/540	235/18862	0.000455127863471496	0.0286600517454622	0.0243989598988854	100144748	17	KLLN	GO
GO:0007050	cell cycle arrest	17/540	235/18862	0.000455127863471496	0.0286600517454622	0.0243989598988854	4088	17	SMAD3	GO
GO:0007050	cell cycle arrest	17/540	235/18862	0.000455127863471496	0.0286600517454622	0.0243989598988854	835	17	CASP2	GO
GO:0007050	cell cycle arrest	17/540	235/18862	0.000455127863471496	0.0286600517454622	0.0243989598988854	6659	17	SOX4	GO
GO:0007050	cell cycle arrest	17/540	235/18862	0.000455127863471496	0.0286600517454622	0.0243989598988854	57472	17	CNOT6	GO
GO:0007050	cell cycle arrest	17/540	235/18862	0.000455127863471496	0.0286600517454622	0.0243989598988854	7157	17	TP53	GO
GO:0007050	cell cycle arrest	17/540	235/18862	0.000455127863471496	0.0286600517454622	0.0243989598988854	51719	17	CAB39	GO
GO:0007050	cell cycle arrest	17/540	235/18862	0.000455127863471496	0.0286600517454622	0.0243989598988854	79366	17	HMGN5	GO
GO:0007050	cell cycle arrest	17/540	235/18862	0.000455127863471496	0.0286600517454622	0.0243989598988854	4194	17	MDM4	GO
GO:0007050	cell cycle arrest	17/540	235/18862	0.000455127863471496	0.0286600517454622	0.0243989598988854	11180	17	WDR6	GO
GO:0008361	regulation of cell size	14/540	173/18862	0.000470213288126304	0.0287536825969262	0.0244786699918908	6558	14	SLC12A2	GO
GO:0008361	regulation of cell size	14/540	173/18862	0.000470213288126304	0.0287536825969262	0.0244786699918908	5728	14	PTEN	GO
GO:0008361	regulation of cell size	14/540	173/18862	0.000470213288126304	0.0287536825969262	0.0244786699918908	2258	14	FGF13	GO
GO:0008361	regulation of cell size	14/540	173/18862	0.000470213288126304	0.0287536825969262	0.0244786699918908	5962	14	RDX	GO
GO:0008361	regulation of cell size	14/540	173/18862	0.000470213288126304	0.0287536825969262	0.0244786699918908	128239	14	IQGAP3	GO
GO:0008361	regulation of cell size	14/540	173/18862	0.000470213288126304	0.0287536825969262	0.0244786699918908	23108	14	RAP1GAP2	GO
GO:0008361	regulation of cell size	14/540	173/18862	0.000470213288126304	0.0287536825969262	0.0244786699918908	6049	14	RNF6	GO
GO:0008361	regulation of cell size	14/540	173/18862	0.000470213288126304	0.0287536825969262	0.0244786699918908	1808	14	DPYSL2	GO
GO:0008361	regulation of cell size	14/540	173/18862	0.000470213288126304	0.0287536825969262	0.0244786699918908	23011	14	RAB21	GO
GO:0008361	regulation of cell size	14/540	173/18862	0.000470213288126304	0.0287536825969262	0.0244786699918908	2017	14	CTTN	GO
GO:0008361	regulation of cell size	14/540	173/18862	0.000470213288126304	0.0287536825969262	0.0244786699918908	4131	14	MAP1B	GO
GO:0008361	regulation of cell size	14/540	173/18862	0.000470213288126304	0.0287536825969262	0.0244786699918908	10507	14	SEMA4D	GO
GO:0008361	regulation of cell size	14/540	173/18862	0.000470213288126304	0.0287536825969262	0.0244786699918908	7474	14	WNT5A	GO
GO:0008361	regulation of cell size	14/540	173/18862	0.000470213288126304	0.0287536825969262	0.0244786699918908	23111	14	SPART	GO
GO:0043401	steroid hormone mediated signaling pathway	12/540	134/18862	0.000476183945003541	0.0287536825969262	0.0244786699918908	29966	12	STRN3	GO
GO:0043401	steroid hormone mediated signaling pathway	12/540	134/18862	0.000476183945003541	0.0287536825969262	0.0244786699918908	55885	12	LMO3	GO
GO:0043401	steroid hormone mediated signaling pathway	12/540	134/18862	0.000476183945003541	0.0287536825969262	0.0244786699918908	9125	12	CNOT9	GO
GO:0043401	steroid hormone mediated signaling pathway	12/540	134/18862	0.000476183945003541	0.0287536825969262	0.0244786699918908	27086	12	FOXP1	GO
GO:0043401	steroid hormone mediated signaling pathway	12/540	134/18862	0.000476183945003541	0.0287536825969262	0.0244786699918908	5469	12	MED1	GO
GO:0043401	steroid hormone mediated signaling pathway	12/540	134/18862	0.000476183945003541	0.0287536825969262	0.0244786699918908	865	12	CBFB	GO
GO:0043401	steroid hormone mediated signaling pathway	12/540	134/18862	0.000476183945003541	0.0287536825969262	0.0244786699918908	10521	12	DDX17	GO
GO:0043401	steroid hormone mediated signaling pathway	12/540	134/18862	0.000476183945003541	0.0287536825969262	0.0244786699918908	4824	12	NKX3-1	GO
GO:0043401	steroid hormone mediated signaling pathway	12/540	134/18862	0.000476183945003541	0.0287536825969262	0.0244786699918908	6049	12	RNF6	GO
GO:0043401	steroid hormone mediated signaling pathway	12/540	134/18862	0.000476183945003541	0.0287536825969262	0.0244786699918908	164091	12	PAQR7	GO
GO:0043401	steroid hormone mediated signaling pathway	12/540	134/18862	0.000476183945003541	0.0287536825969262	0.0244786699918908	10413	12	YAP1	GO
GO:0043401	steroid hormone mediated signaling pathway	12/540	134/18862	0.000476183945003541	0.0287536825969262	0.0244786699918908	23411	12	SIRT1	GO
GO:0090101	negative regulation of transmembrane receptor protein serine/threonine kinase signaling pathway	12/540	134/18862	0.000476183945003541	0.0287536825969262	0.0244786699918908	6498	12	SKIL	GO
GO:0090101	negative regulation of transmembrane receptor protein serine/threonine kinase signaling pathway	12/540	134/18862	0.000476183945003541	0.0287536825969262	0.0244786699918908	7046	12	TGFBR1	GO
GO:0090101	negative regulation of transmembrane receptor protein serine/threonine kinase signaling pathway	12/540	134/18862	0.000476183945003541	0.0287536825969262	0.0244786699918908	4087	12	SMAD2	GO
GO:0090101	negative regulation of transmembrane receptor protein serine/threonine kinase signaling pathway	12/540	134/18862	0.000476183945003541	0.0287536825969262	0.0244786699918908	51232	12	CRIM1	GO
GO:0090101	negative regulation of transmembrane receptor protein serine/threonine kinase signaling pathway	12/540	134/18862	0.000476183945003541	0.0287536825969262	0.0244786699918908	4088	12	SMAD3	GO
GO:0090101	negative regulation of transmembrane receptor protein serine/threonine kinase signaling pathway	12/540	134/18862	0.000476183945003541	0.0287536825969262	0.0244786699918908	7049	12	TGFBR3	GO
GO:0090101	negative regulation of transmembrane receptor protein serine/threonine kinase signaling pathway	12/540	134/18862	0.000476183945003541	0.0287536825969262	0.0244786699918908	7157	12	TP53	GO
GO:0090101	negative regulation of transmembrane receptor protein serine/threonine kinase signaling pathway	12/540	134/18862	0.000476183945003541	0.0287536825969262	0.0244786699918908	10140	12	TOB1	GO
GO:0090101	negative regulation of transmembrane receptor protein serine/threonine kinase signaling pathway	12/540	134/18862	0.000476183945003541	0.0287536825969262	0.0244786699918908	23411	12	SIRT1	GO
GO:0090101	negative regulation of transmembrane receptor protein serine/threonine kinase signaling pathway	12/540	134/18862	0.000476183945003541	0.0287536825969262	0.0244786699918908	135228	12	CD109	GO
GO:0090101	negative regulation of transmembrane receptor protein serine/threonine kinase signaling pathway	12/540	134/18862	0.000476183945003541	0.0287536825969262	0.0244786699918908	7474	12	WNT5A	GO
GO:0090101	negative regulation of transmembrane receptor protein serine/threonine kinase signaling pathway	12/540	134/18862	0.000476183945003541	0.0287536825969262	0.0244786699918908	23111	12	SPART	GO
GO:0043242	negative regulation of protein-containing complex disassembly	9/540	81/18862	0.000505309403327706	0.0301000520252504	0.0256248651900892	829	9	CAPZA1	GO
GO:0043242	negative regulation of protein-containing complex disassembly	9/540	81/18862	0.000505309403327706	0.0301000520252504	0.0256248651900892	2258	9	FGF13	GO
GO:0043242	negative regulation of protein-containing complex disassembly	9/540	81/18862	0.000505309403327706	0.0301000520252504	0.0256248651900892	5962	9	RDX	GO
GO:0043242	negative regulation of protein-containing complex disassembly	9/540	81/18862	0.000505309403327706	0.0301000520252504	0.0256248651900892	55604	9	CARMIL1	GO
GO:0043242	negative regulation of protein-containing complex disassembly	9/540	81/18862	0.000505309403327706	0.0301000520252504	0.0256248651900892	9711	9	RUBCN	GO
GO:0043242	negative regulation of protein-containing complex disassembly	9/540	81/18862	0.000505309403327706	0.0301000520252504	0.0256248651900892	56893	9	UBQLN4	GO
GO:0043242	negative regulation of protein-containing complex disassembly	9/540	81/18862	0.000505309403327706	0.0301000520252504	0.0256248651900892	4131	9	MAP1B	GO
GO:0043242	negative regulation of protein-containing complex disassembly	9/540	81/18862	0.000505309403327706	0.0301000520252504	0.0256248651900892	830	9	CAPZA2	GO
GO:0043242	negative regulation of protein-containing complex disassembly	9/540	81/18862	0.000505309403327706	0.0301000520252504	0.0256248651900892	56203	9	LMOD3	GO
GO:0010771	negative regulation of cell morphogenesis involved in differentiation	4/540	14/18862	0.000529048902592201	0.0306848363503477	0.0261227055088808	1946	4	EFNA5	GO
GO:0010771	negative regulation of cell morphogenesis involved in differentiation	4/540	14/18862	0.000529048902592201	0.0306848363503477	0.0261227055088808	2192	4	FBLN1	GO
GO:0010771	negative regulation of cell morphogenesis involved in differentiation	4/540	14/18862	0.000529048902592201	0.0306848363503477	0.0261227055088808	4241	4	MELTF	GO
GO:0010771	negative regulation of cell morphogenesis involved in differentiation	4/540	14/18862	0.000529048902592201	0.0306848363503477	0.0261227055088808	55435	4	AP1AR	GO
GO:1900025	negative regulation of substrate adhesion-dependent cell spreading	4/540	14/18862	0.000529048902592201	0.0306848363503477	0.0261227055088808	1946	4	EFNA5	GO
GO:1900025	negative regulation of substrate adhesion-dependent cell spreading	4/540	14/18862	0.000529048902592201	0.0306848363503477	0.0261227055088808	2192	4	FBLN1	GO
GO:1900025	negative regulation of substrate adhesion-dependent cell spreading	4/540	14/18862	0.000529048902592201	0.0306848363503477	0.0261227055088808	4241	4	MELTF	GO
GO:1900025	negative regulation of substrate adhesion-dependent cell spreading	4/540	14/18862	0.000529048902592201	0.0306848363503477	0.0261227055088808	55435	4	AP1AR	GO
GO:0045137	development of primary sexual characteristics	16/540	217/18862	0.000538680272337255	0.0308376966293847	0.0262528389731007	92	16	ACVR2A	GO
GO:0045137	development of primary sexual characteristics	16/540	217/18862	0.000538680272337255	0.0308376966293847	0.0262528389731007	7543	16	ZFX	GO
GO:0045137	development of primary sexual characteristics	16/540	217/18862	0.000538680272337255	0.0308376966293847	0.0262528389731007	7046	16	TGFBR1	GO
GO:0045137	development of primary sexual characteristics	16/540	217/18862	0.000538680272337255	0.0308376966293847	0.0262528389731007	2254	16	FGF9	GO
GO:0045137	development of primary sexual characteristics	16/540	217/18862	0.000538680272337255	0.0308376966293847	0.0262528389731007	658	16	BMPR1B	GO
GO:0045137	development of primary sexual characteristics	16/540	217/18862	0.000538680272337255	0.0308376966293847	0.0262528389731007	3157	16	HMGCS1	GO
GO:0045137	development of primary sexual characteristics	16/540	217/18862	0.000538680272337255	0.0308376966293847	0.0262528389731007	4824	16	NKX3-1	GO
GO:0045137	development of primary sexual characteristics	16/540	217/18862	0.000538680272337255	0.0308376966293847	0.0262528389731007	9468	16	PCYT1B	GO
GO:0045137	development of primary sexual characteristics	16/540	217/18862	0.000538680272337255	0.0308376966293847	0.0262528389731007	59338	16	PLEKHA1	GO
GO:0045137	development of primary sexual characteristics	16/540	217/18862	0.000538680272337255	0.0308376966293847	0.0262528389731007	835	16	CASP2	GO
GO:0045137	development of primary sexual characteristics	16/540	217/18862	0.000538680272337255	0.0308376966293847	0.0262528389731007	431707	16	LHX8	GO
GO:0045137	development of primary sexual characteristics	16/540	217/18862	0.000538680272337255	0.0308376966293847	0.0262528389731007	157506	16	RDH10	GO
GO:0045137	development of primary sexual characteristics	16/540	217/18862	0.000538680272337255	0.0308376966293847	0.0262528389731007	23411	16	SIRT1	GO
GO:0045137	development of primary sexual characteristics	16/540	217/18862	0.000538680272337255	0.0308376966293847	0.0262528389731007	4257	16	MGST1	GO
GO:0045137	development of primary sexual characteristics	16/540	217/18862	0.000538680272337255	0.0308376966293847	0.0262528389731007	7022	16	TFAP2C	GO
GO:0045137	development of primary sexual characteristics	16/540	217/18862	0.000538680272337255	0.0308376966293847	0.0262528389731007	7474	16	WNT5A	GO
GO:0003007	heart morphogenesis	17/540	239/18862	0.000551695455844896	0.0311778662739013	0.0265424331995554	1499	17	CTNNB1	GO
GO:0003007	heart morphogenesis	17/540	239/18862	0.000551695455844896	0.0311778662739013	0.0265424331995554	196528	17	ARID2	GO
GO:0003007	heart morphogenesis	17/540	239/18862	0.000551695455844896	0.0311778662739013	0.0265424331995554	7046	17	TGFBR1	GO
GO:0003007	heart morphogenesis	17/540	239/18862	0.000551695455844896	0.0311778662739013	0.0265424331995554	27250	17	PDCD4	GO
GO:0003007	heart morphogenesis	17/540	239/18862	0.000551695455844896	0.0311778662739013	0.0265424331995554	10427	17	SEC24B	GO
GO:0003007	heart morphogenesis	17/540	239/18862	0.000551695455844896	0.0311778662739013	0.0265424331995554	5469	17	MED1	GO
GO:0003007	heart morphogenesis	17/540	239/18862	0.000551695455844896	0.0311778662739013	0.0265424331995554	79977	17	GRHL2	GO
GO:0003007	heart morphogenesis	17/540	239/18862	0.000551695455844896	0.0311778662739013	0.0265424331995554	4088	17	SMAD3	GO
GO:0003007	heart morphogenesis	17/540	239/18862	0.000551695455844896	0.0311778662739013	0.0265424331995554	6659	17	SOX4	GO
GO:0003007	heart morphogenesis	17/540	239/18862	0.000551695455844896	0.0311778662739013	0.0265424331995554	7049	17	TGFBR3	GO
GO:0003007	heart morphogenesis	17/540	239/18862	0.000551695455844896	0.0311778662739013	0.0265424331995554	6262	17	RYR2	GO
GO:0003007	heart morphogenesis	17/540	239/18862	0.000551695455844896	0.0311778662739013	0.0265424331995554	7157	17	TP53	GO
GO:0003007	heart morphogenesis	17/540	239/18862	0.000551695455844896	0.0311778662739013	0.0265424331995554	10413	17	YAP1	GO
GO:0003007	heart morphogenesis	17/540	239/18862	0.000551695455844896	0.0311778662739013	0.0265424331995554	3643	17	INSR	GO
GO:0003007	heart morphogenesis	17/540	239/18862	0.000551695455844896	0.0311778662739013	0.0265424331995554	4625	17	MYH7	GO
GO:0003007	heart morphogenesis	17/540	239/18862	0.000551695455844896	0.0311778662739013	0.0265424331995554	4194	17	MDM4	GO
GO:0003007	heart morphogenesis	17/540	239/18862	0.000551695455844896	0.0311778662739013	0.0265424331995554	7474	17	WNT5A	GO
GO:0007548	sex differentiation	18/540	262/18862	0.000578980539193075	0.0317331437861248	0.0270151536912634	92	18	ACVR2A	GO
GO:0007548	sex differentiation	18/540	262/18862	0.000578980539193075	0.0317331437861248	0.0270151536912634	7543	18	ZFX	GO
GO:0007548	sex differentiation	18/540	262/18862	0.000578980539193075	0.0317331437861248	0.0270151536912634	7046	18	TGFBR1	GO
GO:0007548	sex differentiation	18/540	262/18862	0.000578980539193075	0.0317331437861248	0.0270151536912634	2254	18	FGF9	GO
GO:0007548	sex differentiation	18/540	262/18862	0.000578980539193075	0.0317331437861248	0.0270151536912634	9125	18	CNOT9	GO
GO:0007548	sex differentiation	18/540	262/18862	0.000578980539193075	0.0317331437861248	0.0270151536912634	658	18	BMPR1B	GO
GO:0007548	sex differentiation	18/540	262/18862	0.000578980539193075	0.0317331437861248	0.0270151536912634	3157	18	HMGCS1	GO
GO:0007548	sex differentiation	18/540	262/18862	0.000578980539193075	0.0317331437861248	0.0270151536912634	4824	18	NKX3-1	GO
GO:0007548	sex differentiation	18/540	262/18862	0.000578980539193075	0.0317331437861248	0.0270151536912634	9468	18	PCYT1B	GO
GO:0007548	sex differentiation	18/540	262/18862	0.000578980539193075	0.0317331437861248	0.0270151536912634	59338	18	PLEKHA1	GO
GO:0007548	sex differentiation	18/540	262/18862	0.000578980539193075	0.0317331437861248	0.0270151536912634	835	18	CASP2	GO
GO:0007548	sex differentiation	18/540	262/18862	0.000578980539193075	0.0317331437861248	0.0270151536912634	431707	18	LHX8	GO
GO:0007548	sex differentiation	18/540	262/18862	0.000578980539193075	0.0317331437861248	0.0270151536912634	157506	18	RDH10	GO
GO:0007548	sex differentiation	18/540	262/18862	0.000578980539193075	0.0317331437861248	0.0270151536912634	10461	18	MERTK	GO
GO:0007548	sex differentiation	18/540	262/18862	0.000578980539193075	0.0317331437861248	0.0270151536912634	23411	18	SIRT1	GO
GO:0007548	sex differentiation	18/540	262/18862	0.000578980539193075	0.0317331437861248	0.0270151536912634	4257	18	MGST1	GO
GO:0007548	sex differentiation	18/540	262/18862	0.000578980539193075	0.0317331437861248	0.0270151536912634	7022	18	TFAP2C	GO
GO:0007548	sex differentiation	18/540	262/18862	0.000578980539193075	0.0317331437861248	0.0270151536912634	7474	18	WNT5A	GO
GO:0043161	proteasome-mediated ubiquitin-dependent protein catabolic process	25/540	425/18862	0.000581065183285515	0.0317331437861248	0.0270151536912634	1452	25	CSNK1A1	GO
GO:0043161	proteasome-mediated ubiquitin-dependent protein catabolic process	25/540	425/18862	0.000581065183285515	0.0317331437861248	0.0270151536912634	1499	25	CTNNB1	GO
GO:0043161	proteasome-mediated ubiquitin-dependent protein catabolic process	25/540	425/18862	0.000581065183285515	0.0317331437861248	0.0270151536912634	6400	25	SEL1L	GO
GO:0043161	proteasome-mediated ubiquitin-dependent protein catabolic process	25/540	425/18862	0.000581065183285515	0.0317331437861248	0.0270151536912634	8473	25	OGT	GO
GO:0043161	proteasome-mediated ubiquitin-dependent protein catabolic process	25/540	425/18862	0.000581065183285515	0.0317331437861248	0.0270151536912634	79718	25	TBL1XR1	GO
GO:0043161	proteasome-mediated ubiquitin-dependent protein catabolic process	25/540	425/18862	0.000581065183285515	0.0317331437861248	0.0270151536912634	7326	25	UBE2G1	GO
GO:0043161	proteasome-mediated ubiquitin-dependent protein catabolic process	25/540	425/18862	0.000581065183285515	0.0317331437861248	0.0270151536912634	55294	25	FBXW7	GO
GO:0043161	proteasome-mediated ubiquitin-dependent protein catabolic process	25/540	425/18862	0.000581065183285515	0.0317331437861248	0.0270151536912634	51283	25	BFAR	GO
GO:0043161	proteasome-mediated ubiquitin-dependent protein catabolic process	25/540	425/18862	0.000581065183285515	0.0317331437861248	0.0270151536912634	79845	25	RNF122	GO
GO:0043161	proteasome-mediated ubiquitin-dependent protein catabolic process	25/540	425/18862	0.000581065183285515	0.0317331437861248	0.0270151536912634	255488	25	RNF144B	GO
GO:0043161	proteasome-mediated ubiquitin-dependent protein catabolic process	25/540	425/18862	0.000581065183285515	0.0317331437861248	0.0270151536912634	9354	25	UBE4A	GO
GO:0043161	proteasome-mediated ubiquitin-dependent protein catabolic process	25/540	425/18862	0.000581065183285515	0.0317331437861248	0.0270151536912634	51009	25	DERL2	GO
GO:0043161	proteasome-mediated ubiquitin-dependent protein catabolic process	25/540	425/18862	0.000581065183285515	0.0317331437861248	0.0270151536912634	7993	25	UBXN8	GO
GO:0043161	proteasome-mediated ubiquitin-dependent protein catabolic process	25/540	425/18862	0.000581065183285515	0.0317331437861248	0.0270151536912634	387921	25	NHLRC3	GO
GO:0043161	proteasome-mediated ubiquitin-dependent protein catabolic process	25/540	425/18862	0.000581065183285515	0.0317331437861248	0.0270151536912634	5527	25	PPP2R5C	GO
GO:0043161	proteasome-mediated ubiquitin-dependent protein catabolic process	25/540	425/18862	0.000581065183285515	0.0317331437861248	0.0270151536912634	55432	25	YOD1	GO
GO:0043161	proteasome-mediated ubiquitin-dependent protein catabolic process	25/540	425/18862	0.000581065183285515	0.0317331437861248	0.0270151536912634	5720	25	PSME1	GO
GO:0043161	proteasome-mediated ubiquitin-dependent protein catabolic process	25/540	425/18862	0.000581065183285515	0.0317331437861248	0.0270151536912634	117584	25	RFFL	GO
GO:0043161	proteasome-mediated ubiquitin-dependent protein catabolic process	25/540	425/18862	0.000581065183285515	0.0317331437861248	0.0270151536912634	5692	25	PSMB4	GO
GO:0043161	proteasome-mediated ubiquitin-dependent protein catabolic process	25/540	425/18862	0.000581065183285515	0.0317331437861248	0.0270151536912634	56893	25	UBQLN4	GO
GO:0043161	proteasome-mediated ubiquitin-dependent protein catabolic process	25/540	425/18862	0.000581065183285515	0.0317331437861248	0.0270151536912634	5887	25	RAD23B	GO
GO:0043161	proteasome-mediated ubiquitin-dependent protein catabolic process	25/540	425/18862	0.000581065183285515	0.0317331437861248	0.0270151536912634	55666	25	NPLOC4	GO
GO:0043161	proteasome-mediated ubiquitin-dependent protein catabolic process	25/540	425/18862	0.000581065183285515	0.0317331437861248	0.0270151536912634	9695	25	EDEM1	GO
GO:0043161	proteasome-mediated ubiquitin-dependent protein catabolic process	25/540	425/18862	0.000581065183285515	0.0317331437861248	0.0270151536912634	23411	25	SIRT1	GO
GO:0043161	proteasome-mediated ubiquitin-dependent protein catabolic process	25/540	425/18862	0.000581065183285515	0.0317331437861248	0.0270151536912634	29978	25	UBQLN2	GO
GO:0002790	peptide secretion	24/540	401/18862	0.000583118114037229	0.0317331437861248	0.0270151536912634	6558	24	SLC12A2	GO
GO:0002790	peptide secretion	24/540	401/18862	0.000583118114037229	0.0317331437861248	0.0270151536912634	19	24	ABCA1	GO
GO:0002790	peptide secretion	24/540	401/18862	0.000583118114037229	0.0317331437861248	0.0270151536912634	6400	24	SEL1L	GO
GO:0002790	peptide secretion	24/540	401/18862	0.000583118114037229	0.0317331437861248	0.0270151536912634	5208	24	PFKFB2	GO
GO:0002790	peptide secretion	24/540	401/18862	0.000583118114037229	0.0317331437861248	0.0270151536912634	5530	24	PPP3CA	GO
GO:0002790	peptide secretion	24/540	401/18862	0.000583118114037229	0.0317331437861248	0.0270151536912634	7074	24	TIAM1	GO
GO:0002790	peptide secretion	24/540	401/18862	0.000583118114037229	0.0317331437861248	0.0270151536912634	23435	24	TARDBP	GO
GO:0002790	peptide secretion	24/540	401/18862	0.000583118114037229	0.0317331437861248	0.0270151536912634	4087	24	SMAD2	GO
GO:0002790	peptide secretion	24/540	401/18862	0.000583118114037229	0.0317331437861248	0.0270151536912634	382	24	ARF6	GO
GO:0002790	peptide secretion	24/540	401/18862	0.000583118114037229	0.0317331437861248	0.0270151536912634	55204	24	GOLPH3L	GO
GO:0002790	peptide secretion	24/540	401/18862	0.000583118114037229	0.0317331437861248	0.0270151536912634	9545	24	RAB3D	GO
GO:0002790	peptide secretion	24/540	401/18862	0.000583118114037229	0.0317331437861248	0.0270151536912634	387597	24	ILDR2	GO
GO:0002790	peptide secretion	24/540	401/18862	0.000583118114037229	0.0317331437861248	0.0270151536912634	22841	24	RAB11FIP2	GO
GO:0002790	peptide secretion	24/540	401/18862	0.000583118114037229	0.0317331437861248	0.0270151536912634	7430	24	EZR	GO
GO:0002790	peptide secretion	24/540	401/18862	0.000583118114037229	0.0317331437861248	0.0270151536912634	1946	24	EFNA5	GO
GO:0002790	peptide secretion	24/540	401/18862	0.000583118114037229	0.0317331437861248	0.0270151536912634	84830	24	ADTRP	GO
GO:0002790	peptide secretion	24/540	401/18862	0.000583118114037229	0.0317331437861248	0.0270151536912634	6659	24	SOX4	GO
GO:0002790	peptide secretion	24/540	401/18862	0.000583118114037229	0.0317331437861248	0.0270151536912634	2822	24	GPLD1	GO
GO:0002790	peptide secretion	24/540	401/18862	0.000583118114037229	0.0317331437861248	0.0270151536912634	9601	24	PDIA4	GO
GO:0002790	peptide secretion	24/540	401/18862	0.000583118114037229	0.0317331437861248	0.0270151536912634	388552	24	BLOC1S3	GO
GO:0002790	peptide secretion	24/540	401/18862	0.000583118114037229	0.0317331437861248	0.0270151536912634	134957	24	STXBP5	GO
GO:0002790	peptide secretion	24/540	401/18862	0.000583118114037229	0.0317331437861248	0.0270151536912634	2850	24	GPR27	GO
GO:0002790	peptide secretion	24/540	401/18862	0.000583118114037229	0.0317331437861248	0.0270151536912634	80024	24	SLC8B1	GO
GO:0002790	peptide secretion	24/540	401/18862	0.000583118114037229	0.0317331437861248	0.0270151536912634	8609	24	KLF7	GO
GO:0010906	regulation of glucose metabolic process	11/540	119/18862	0.000620902526233901	0.0333772967760858	0.0284148588706528	5208	11	PFKFB2	GO
GO:0010906	regulation of glucose metabolic process	11/540	119/18862	0.000620902526233901	0.0333772967760858	0.0284148588706528	5500	11	PPP1CB	GO
GO:0010906	regulation of glucose metabolic process	11/540	119/18862	0.000620902526233901	0.0333772967760858	0.0284148588706528	8473	11	OGT	GO
GO:0010906	regulation of glucose metabolic process	11/540	119/18862	0.000620902526233901	0.0333772967760858	0.0284148588706528	5163	11	PDK1	GO
GO:0010906	regulation of glucose metabolic process	11/540	119/18862	0.000620902526233901	0.0333772967760858	0.0284148588706528	2822	11	GPLD1	GO
GO:0010906	regulation of glucose metabolic process	11/540	119/18862	0.000620902526233901	0.0333772967760858	0.0284148588706528	7157	11	TP53	GO
GO:0010906	regulation of glucose metabolic process	11/540	119/18862	0.000620902526233901	0.0333772967760858	0.0284148588706528	3643	11	INSR	GO
GO:0010906	regulation of glucose metabolic process	11/540	119/18862	0.000620902526233901	0.0333772967760858	0.0284148588706528	9852	11	EPM2AIP1	GO
GO:0010906	regulation of glucose metabolic process	11/540	119/18862	0.000620902526233901	0.0333772967760858	0.0284148588706528	23411	11	SIRT1	GO
GO:0010906	regulation of glucose metabolic process	11/540	119/18862	0.000620902526233901	0.0333772967760858	0.0284148588706528	5506	11	PPP1R3A	GO
GO:0010906	regulation of glucose metabolic process	11/540	119/18862	0.000620902526233901	0.0333772967760858	0.0284148588706528	140710	11	SOGA1	GO
GO:0036498	IRE1-mediated unfolded protein response	8/540	67/18862	0.000633546797377761	0.0336466781065201	0.028644189380491	55161	8	TMEM33	GO
GO:0036498	IRE1-mediated unfolded protein response	8/540	67/18862	0.000633546797377761	0.0336466781065201	0.028644189380491	51283	8	BFAR	GO
GO:0036498	IRE1-mediated unfolded protein response	8/540	67/18862	0.000633546797377761	0.0336466781065201	0.028644189380491	58477	8	SRPRB	GO
GO:0036498	IRE1-mediated unfolded protein response	8/540	67/18862	0.000633546797377761	0.0336466781065201	0.028644189380491	5611	8	DNAJC3	GO
GO:0036498	IRE1-mediated unfolded protein response	8/540	67/18862	0.000633546797377761	0.0336466781065201	0.028644189380491	9695	8	EDEM1	GO
GO:0036498	IRE1-mediated unfolded protein response	8/540	67/18862	0.000633546797377761	0.0336466781065201	0.028644189380491	11153	8	FICD	GO
GO:0036498	IRE1-mediated unfolded protein response	8/540	67/18862	0.000633546797377761	0.0336466781065201	0.028644189380491	1639	8	DCTN1	GO
GO:0036498	IRE1-mediated unfolded protein response	8/540	67/18862	0.000633546797377761	0.0336466781065201	0.028644189380491	7094	8	TLN1	GO
GO:1903311	regulation of mRNA metabolic process	21/540	334/18862	0.000675046193458947	0.035423852628179	0.0301571388431221	9530	21	BAG4	GO
GO:1903311	regulation of mRNA metabolic process	21/540	334/18862	0.000675046193458947	0.035423852628179	0.0301571388431221	29896	21	TRA2A	GO
GO:1903311	regulation of mRNA metabolic process	21/540	334/18862	0.000675046193458947	0.035423852628179	0.0301571388431221	6418	21	SET	GO
GO:1903311	regulation of mRNA metabolic process	21/540	334/18862	0.000675046193458947	0.035423852628179	0.0301571388431221	9589	21	WTAP	GO
GO:1903311	regulation of mRNA metabolic process	21/540	334/18862	0.000675046193458947	0.035423852628179	0.0301571388431221	6431	21	SRSF6	GO
GO:1903311	regulation of mRNA metabolic process	21/540	334/18862	0.000675046193458947	0.035423852628179	0.0301571388431221	23435	21	TARDBP	GO
GO:1903311	regulation of mRNA metabolic process	21/540	334/18862	0.000675046193458947	0.035423852628179	0.0301571388431221	580	21	BARD1	GO
GO:1903311	regulation of mRNA metabolic process	21/540	334/18862	0.000675046193458947	0.035423852628179	0.0301571388431221	55603	21	TENT5A	GO
GO:1903311	regulation of mRNA metabolic process	21/540	334/18862	0.000675046193458947	0.035423852628179	0.0301571388431221	2332	21	FMR1	GO
GO:1903311	regulation of mRNA metabolic process	21/540	334/18862	0.000675046193458947	0.035423852628179	0.0301571388431221	6428	21	SRSF3	GO
GO:1903311	regulation of mRNA metabolic process	21/540	334/18862	0.000675046193458947	0.035423852628179	0.0301571388431221	10521	21	DDX17	GO
GO:1903311	regulation of mRNA metabolic process	21/540	334/18862	0.000675046193458947	0.035423852628179	0.0301571388431221	64506	21	CPEB1	GO
GO:1903311	regulation of mRNA metabolic process	21/540	334/18862	0.000675046193458947	0.035423852628179	0.0301571388431221	8087	21	FXR1	GO
GO:1903311	regulation of mRNA metabolic process	21/540	334/18862	0.000675046193458947	0.035423852628179	0.0301571388431221	118460	21	EXOSC6	GO
GO:1903311	regulation of mRNA metabolic process	21/540	334/18862	0.000675046193458947	0.035423852628179	0.0301571388431221	25819	21	NOCT	GO
GO:1903311	regulation of mRNA metabolic process	21/540	334/18862	0.000675046193458947	0.035423852628179	0.0301571388431221	3191	21	HNRNPL	GO
GO:1903311	regulation of mRNA metabolic process	21/540	334/18862	0.000675046193458947	0.035423852628179	0.0301571388431221	5720	21	PSME1	GO
GO:1903311	regulation of mRNA metabolic process	21/540	334/18862	0.000675046193458947	0.035423852628179	0.0301571388431221	5692	21	PSMB4	GO
GO:1903311	regulation of mRNA metabolic process	21/540	334/18862	0.000675046193458947	0.035423852628179	0.0301571388431221	10140	21	TOB1	GO
GO:1903311	regulation of mRNA metabolic process	21/540	334/18862	0.000675046193458947	0.035423852628179	0.0301571388431221	7072	21	TIA1	GO
GO:1903311	regulation of mRNA metabolic process	21/540	334/18862	0.000675046193458947	0.035423852628179	0.0301571388431221	678	21	ZFP36L2	GO
GO:0051438	regulation of ubiquitin-protein transferase activity	7/540	53/18862	0.000746646061719512	0.0383383712518598	0.0326383354458115	5728	7	PTEN	GO
GO:0051438	regulation of ubiquitin-protein transferase activity	7/540	53/18862	0.000746646061719512	0.0383383712518598	0.0326383354458115	54165	7	DCUN1D1	GO
GO:0051438	regulation of ubiquitin-protein transferase activity	7/540	53/18862	0.000746646061719512	0.0383383712518598	0.0326383354458115	23142	7	DCUN1D4	GO
GO:0051438	regulation of ubiquitin-protein transferase activity	7/540	53/18862	0.000746646061719512	0.0383383712518598	0.0326383354458115	55294	7	FBXW7	GO
GO:0051438	regulation of ubiquitin-protein transferase activity	7/540	53/18862	0.000746646061719512	0.0383383712518598	0.0326383354458115	57561	7	ARRDC3	GO
GO:0051438	regulation of ubiquitin-protein transferase activity	7/540	53/18862	0.000746646061719512	0.0383383712518598	0.0326383354458115	648	7	BMI1	GO
GO:0051438	regulation of ubiquitin-protein transferase activity	7/540	53/18862	0.000746646061719512	0.0383383712518598	0.0326383354458115	9532	7	BAG2	GO
GO:0033598	mammary gland epithelial cell proliferation	5/540	26/18862	0.000754309967849304	0.0383383712518598	0.0326383354458115	6239	5	RREB1	GO
GO:0033598	mammary gland epithelial cell proliferation	5/540	26/18862	0.000754309967849304	0.0383383712518598	0.0326383354458115	128239	5	IQGAP3	GO
GO:0033598	mammary gland epithelial cell proliferation	5/540	26/18862	0.000754309967849304	0.0383383712518598	0.0326383354458115	5469	5	MED1	GO
GO:0033598	mammary gland epithelial cell proliferation	5/540	26/18862	0.000754309967849304	0.0383383712518598	0.0326383354458115	5594	5	MAPK1	GO
GO:0033598	mammary gland epithelial cell proliferation	5/540	26/18862	0.000754309967849304	0.0383383712518598	0.0326383354458115	7474	5	WNT5A	GO
GO:0099173	postsynapse organization	13/540	161/18862	0.000756678379970917	0.0383383712518598	0.0326383354458115	5728	13	PTEN	GO
GO:0099173	postsynapse organization	13/540	161/18862	0.000756678379970917	0.0383383712518598	0.0326383354458115	80823	13	BHLHB9	GO
GO:0099173	postsynapse organization	13/540	161/18862	0.000756678379970917	0.0383383712518598	0.0326383354458115	7074	13	TIAM1	GO
GO:0099173	postsynapse organization	13/540	161/18862	0.000756678379970917	0.0383383712518598	0.0326383354458115	102	13	ADAM10	GO
GO:0099173	postsynapse organization	13/540	161/18862	0.000756678379970917	0.0383383712518598	0.0326383354458115	382	13	ARF6	GO
GO:0099173	postsynapse organization	13/540	161/18862	0.000756678379970917	0.0383383712518598	0.0326383354458115	3480	13	IGF1R	GO
GO:0099173	postsynapse organization	13/540	161/18862	0.000756678379970917	0.0383383712518598	0.0326383354458115	10163	13	WASF2	GO
GO:0099173	postsynapse organization	13/540	161/18862	0.000756678379970917	0.0383383712518598	0.0326383354458115	1739	13	DLG1	GO
GO:0099173	postsynapse organization	13/540	161/18862	0.000756678379970917	0.0383383712518598	0.0326383354458115	2017	13	CTTN	GO
GO:0099173	postsynapse organization	13/540	161/18862	0.000756678379970917	0.0383383712518598	0.0326383354458115	3643	13	INSR	GO
GO:0099173	postsynapse organization	13/540	161/18862	0.000756678379970917	0.0383383712518598	0.0326383354458115	7474	13	WNT5A	GO
GO:0099173	postsynapse organization	13/540	161/18862	0.000756678379970917	0.0383383712518598	0.0326383354458115	58489	13	ABHD17C	GO
GO:0099173	postsynapse organization	13/540	161/18862	0.000756678379970917	0.0383383712518598	0.0326383354458115	9118	13	INA	GO
GO:0045732	positive regulation of protein catabolic process	16/540	225/18862	0.00079659697666722	0.0394539266645967	0.0335880333745552	1452	16	CSNK1A1	GO
GO:0045732	positive regulation of protein catabolic process	16/540	225/18862	0.00079659697666722	0.0394539266645967	0.0335880333745552	5728	16	PTEN	GO
GO:0045732	positive regulation of protein catabolic process	16/540	225/18862	0.00079659697666722	0.0394539266645967	0.0335880333745552	9554	16	SEC22B	GO
GO:0045732	positive regulation of protein catabolic process	16/540	225/18862	0.00079659697666722	0.0394539266645967	0.0335880333745552	580	16	BARD1	GO
GO:0045732	positive regulation of protein catabolic process	16/540	225/18862	0.00079659697666722	0.0394539266645967	0.0335880333745552	2332	16	FMR1	GO
GO:0045732	positive regulation of protein catabolic process	16/540	225/18862	0.00079659697666722	0.0394539266645967	0.0335880333745552	160418	16	TMTC3	GO
GO:0045732	positive regulation of protein catabolic process	16/540	225/18862	0.00079659697666722	0.0394539266645967	0.0335880333745552	5962	16	RDX	GO
GO:0045732	positive regulation of protein catabolic process	16/540	225/18862	0.00079659697666722	0.0394539266645967	0.0335880333745552	55294	16	FBXW7	GO
GO:0045732	positive regulation of protein catabolic process	16/540	225/18862	0.00079659697666722	0.0394539266645967	0.0335880333745552	255488	16	RNF144B	GO
GO:0045732	positive regulation of protein catabolic process	16/540	225/18862	0.00079659697666722	0.0394539266645967	0.0335880333745552	7430	16	EZR	GO
GO:0045732	positive regulation of protein catabolic process	16/540	225/18862	0.00079659697666722	0.0394539266645967	0.0335880333745552	1457	16	CSNK2A1	GO
GO:0045732	positive regulation of protein catabolic process	16/540	225/18862	0.00079659697666722	0.0394539266645967	0.0335880333745552	2822	16	GPLD1	GO
GO:0045732	positive regulation of protein catabolic process	16/540	225/18862	0.00079659697666722	0.0394539266645967	0.0335880333745552	29978	16	UBQLN2	GO
GO:0045732	positive regulation of protein catabolic process	16/540	225/18862	0.00079659697666722	0.0394539266645967	0.0335880333745552	7474	16	WNT5A	GO
GO:0045732	positive regulation of protein catabolic process	16/540	225/18862	0.00079659697666722	0.0394539266645967	0.0335880333745552	9532	16	BAG2	GO
GO:0045732	positive regulation of protein catabolic process	16/540	225/18862	0.00079659697666722	0.0394539266645967	0.0335880333745552	152503	16	SH3D19	GO
GO:0060560	developmental growth involved in morphogenesis	16/540	225/18862	0.00079659697666722	0.0394539266645967	0.0335880333745552	1499	16	CTNNB1	GO
GO:0060560	developmental growth involved in morphogenesis	16/540	225/18862	0.00079659697666722	0.0394539266645967	0.0335880333745552	7074	16	TIAM1	GO
GO:0060560	developmental growth involved in morphogenesis	16/540	225/18862	0.00079659697666722	0.0394539266645967	0.0335880333745552	2258	16	FGF13	GO
GO:0060560	developmental growth involved in morphogenesis	16/540	225/18862	0.00079659697666722	0.0394539266645967	0.0335880333745552	5469	16	MED1	GO
GO:0060560	developmental growth involved in morphogenesis	16/540	225/18862	0.00079659697666722	0.0394539266645967	0.0335880333745552	6049	16	RNF6	GO
GO:0060560	developmental growth involved in morphogenesis	16/540	225/18862	0.00079659697666722	0.0394539266645967	0.0335880333745552	9706	16	ULK2	GO
GO:0060560	developmental growth involved in morphogenesis	16/540	225/18862	0.00079659697666722	0.0394539266645967	0.0335880333745552	10413	16	YAP1	GO
GO:0060560	developmental growth involved in morphogenesis	16/540	225/18862	0.00079659697666722	0.0394539266645967	0.0335880333745552	1808	16	DPYSL2	GO
GO:0060560	developmental growth involved in morphogenesis	16/540	225/18862	0.00079659697666722	0.0394539266645967	0.0335880333745552	23011	16	RAB21	GO
GO:0060560	developmental growth involved in morphogenesis	16/540	225/18862	0.00079659697666722	0.0394539266645967	0.0335880333745552	157506	16	RDH10	GO
GO:0060560	developmental growth involved in morphogenesis	16/540	225/18862	0.00079659697666722	0.0394539266645967	0.0335880333745552	2017	16	CTTN	GO
GO:0060560	developmental growth involved in morphogenesis	16/540	225/18862	0.00079659697666722	0.0394539266645967	0.0335880333745552	4131	16	MAP1B	GO
GO:0060560	developmental growth involved in morphogenesis	16/540	225/18862	0.00079659697666722	0.0394539266645967	0.0335880333745552	10507	16	SEMA4D	GO
GO:0060560	developmental growth involved in morphogenesis	16/540	225/18862	0.00079659697666722	0.0394539266645967	0.0335880333745552	5361	16	PLXNA1	GO
GO:0060560	developmental growth involved in morphogenesis	16/540	225/18862	0.00079659697666722	0.0394539266645967	0.0335880333745552	7474	16	WNT5A	GO
GO:0060560	developmental growth involved in morphogenesis	16/540	225/18862	0.00079659697666722	0.0394539266645967	0.0335880333745552	23111	16	SPART	GO
GO:0007015	actin filament organization	25/540	435/18862	0.000811062585034174	0.0396938164194786	0.0337922570291913	829	25	CAPZA1	GO
GO:0007015	actin filament organization	25/540	435/18862	0.000811062585034174	0.0396938164194786	0.0337922570291913	9530	25	BAG4	GO
GO:0007015	actin filament organization	25/540	435/18862	0.000811062585034174	0.0396938164194786	0.0337922570291913	253260	25	RICTOR	GO
GO:0007015	actin filament organization	25/540	435/18862	0.000811062585034174	0.0396938164194786	0.0337922570291913	7046	25	TGFBR1	GO
GO:0007015	actin filament organization	25/540	435/18862	0.000811062585034174	0.0396938164194786	0.0337922570291913	382	25	ARF6	GO
GO:0007015	actin filament organization	25/540	435/18862	0.000811062585034174	0.0396938164194786	0.0337922570291913	5962	25	RDX	GO
GO:0007015	actin filament organization	25/540	435/18862	0.000811062585034174	0.0396938164194786	0.0337922570291913	55740	25	ENAH	GO
GO:0007015	actin filament organization	25/540	435/18862	0.000811062585034174	0.0396938164194786	0.0337922570291913	4645	25	MYO5B	GO
GO:0007015	actin filament organization	25/540	435/18862	0.000811062585034174	0.0396938164194786	0.0337922570291913	10163	25	WASF2	GO
GO:0007015	actin filament organization	25/540	435/18862	0.000811062585034174	0.0396938164194786	0.0337922570291913	7430	25	EZR	GO
GO:0007015	actin filament organization	25/540	435/18862	0.000811062585034174	0.0396938164194786	0.0337922570291913	55604	25	CARMIL1	GO
GO:0007015	actin filament organization	25/540	435/18862	0.000811062585034174	0.0396938164194786	0.0337922570291913	1739	25	DLG1	GO
GO:0007015	actin filament organization	25/540	435/18862	0.000811062585034174	0.0396938164194786	0.0337922570291913	4088	25	SMAD3	GO
GO:0007015	actin filament organization	25/540	435/18862	0.000811062585034174	0.0396938164194786	0.0337922570291913	7082	25	TJP1	GO
GO:0007015	actin filament organization	25/540	435/18862	0.000811062585034174	0.0396938164194786	0.0337922570291913	961	25	CD47	GO
GO:0007015	actin filament organization	25/540	435/18862	0.000811062585034174	0.0396938164194786	0.0337922570291913	2241	25	FER	GO
GO:0007015	actin filament organization	25/540	435/18862	0.000811062585034174	0.0396938164194786	0.0337922570291913	10093	25	ARPC4	GO
GO:0007015	actin filament organization	25/540	435/18862	0.000811062585034174	0.0396938164194786	0.0337922570291913	4082	25	MARCKS	GO
GO:0007015	actin filament organization	25/540	435/18862	0.000811062585034174	0.0396938164194786	0.0337922570291913	2017	25	CTTN	GO
GO:0007015	actin filament organization	25/540	435/18862	0.000811062585034174	0.0396938164194786	0.0337922570291913	830	25	CAPZA2	GO
GO:0007015	actin filament organization	25/540	435/18862	0.000811062585034174	0.0396938164194786	0.0337922570291913	2885	25	GRB2	GO
GO:0007015	actin filament organization	25/540	435/18862	0.000811062585034174	0.0396938164194786	0.0337922570291913	56203	25	LMOD3	GO
GO:0007015	actin filament organization	25/540	435/18862	0.000811062585034174	0.0396938164194786	0.0337922570291913	4641	25	MYO1C	GO
GO:0007015	actin filament organization	25/540	435/18862	0.000811062585034174	0.0396938164194786	0.0337922570291913	55435	25	AP1AR	GO
GO:0007015	actin filament organization	25/540	435/18862	0.000811062585034174	0.0396938164194786	0.0337922570291913	91663	25	MYADM	GO
GO:0018022	peptidyl-lysine methylation	11/540	123/18862	0.000819450384340416	0.0396938164194786	0.0337922570291913	84193	11	SETD3	GO
GO:0018022	peptidyl-lysine methylation	11/540	123/18862	0.000819450384340416	0.0396938164194786	0.0337922570291913	1499	11	CTNNB1	GO
GO:0018022	peptidyl-lysine methylation	11/540	123/18862	0.000819450384340416	0.0396938164194786	0.0337922570291913	54904	11	NSD3	GO
GO:0018022	peptidyl-lysine methylation	11/540	123/18862	0.000819450384340416	0.0396938164194786	0.0337922570291913	8473	11	OGT	GO
GO:0018022	peptidyl-lysine methylation	11/540	123/18862	0.000819450384340416	0.0396938164194786	0.0337922570291913	5929	11	RBBP5	GO
GO:0018022	peptidyl-lysine methylation	11/540	123/18862	0.000819450384340416	0.0396938164194786	0.0337922570291913	23512	11	SUZ12	GO
GO:0018022	peptidyl-lysine methylation	11/540	123/18862	0.000819450384340416	0.0396938164194786	0.0337922570291913	57673	11	BEND3	GO
GO:0018022	peptidyl-lysine methylation	11/540	123/18862	0.000819450384340416	0.0396938164194786	0.0337922570291913	25895	11	EEF1AKMT3	GO
GO:0018022	peptidyl-lysine methylation	11/540	123/18862	0.000819450384340416	0.0396938164194786	0.0337922570291913	399818	11	EEF1AKMT2	GO
GO:0018022	peptidyl-lysine methylation	11/540	123/18862	0.000819450384340416	0.0396938164194786	0.0337922570291913	23411	11	SIRT1	GO
GO:0018022	peptidyl-lysine methylation	11/540	123/18862	0.000819450384340416	0.0396938164194786	0.0337922570291913	23067	11	SETD1B	GO
GO:0001501	skeletal system development	27/540	486/18862	0.00084907272455079	0.0406816583676074	0.0346332295540454	92	27	ACVR2A	GO
GO:0001501	skeletal system development	27/540	486/18862	0.00084907272455079	0.0406816583676074	0.0346332295540454	1499	27	CTNNB1	GO
GO:0001501	skeletal system development	27/540	486/18862	0.00084907272455079	0.0406816583676074	0.0346332295540454	80856	27	LNPK	GO
GO:0001501	skeletal system development	27/540	486/18862	0.00084907272455079	0.0406816583676074	0.0346332295540454	7046	27	TGFBR1	GO
GO:0001501	skeletal system development	27/540	486/18862	0.00084907272455079	0.0406816583676074	0.0346332295540454	4087	27	SMAD2	GO
GO:0001501	skeletal system development	27/540	486/18862	0.00084907272455079	0.0406816583676074	0.0346332295540454	83452	27	RAB33B	GO
GO:0001501	skeletal system development	27/540	486/18862	0.00084907272455079	0.0406816583676074	0.0346332295540454	55294	27	FBXW7	GO
GO:0001501	skeletal system development	27/540	486/18862	0.00084907272455079	0.0406816583676074	0.0346332295540454	658	27	BMPR1B	GO
GO:0001501	skeletal system development	27/540	486/18862	0.00084907272455079	0.0406816583676074	0.0346332295540454	80263	27	TRIM45	GO
GO:0001501	skeletal system development	27/540	486/18862	0.00084907272455079	0.0406816583676074	0.0346332295540454	27086	27	FOXP1	GO
GO:0001501	skeletal system development	27/540	486/18862	0.00084907272455079	0.0406816583676074	0.0346332295540454	10163	27	WASF2	GO
GO:0001501	skeletal system development	27/540	486/18862	0.00084907272455079	0.0406816583676074	0.0346332295540454	5469	27	MED1	GO
GO:0001501	skeletal system development	27/540	486/18862	0.00084907272455079	0.0406816583676074	0.0346332295540454	79977	27	GRHL2	GO
GO:0001501	skeletal system development	27/540	486/18862	0.00084907272455079	0.0406816583676074	0.0346332295540454	1739	27	DLG1	GO
GO:0001501	skeletal system development	27/540	486/18862	0.00084907272455079	0.0406816583676074	0.0346332295540454	4088	27	SMAD3	GO
GO:0001501	skeletal system development	27/540	486/18862	0.00084907272455079	0.0406816583676074	0.0346332295540454	59338	27	PLEKHA1	GO
GO:0001501	skeletal system development	27/540	486/18862	0.00084907272455079	0.0406816583676074	0.0346332295540454	5305	27	PIP4K2A	GO
GO:0001501	skeletal system development	27/540	486/18862	0.00084907272455079	0.0406816583676074	0.0346332295540454	6659	27	SOX4	GO
GO:0001501	skeletal system development	27/540	486/18862	0.00084907272455079	0.0406816583676074	0.0346332295540454	2822	27	GPLD1	GO
GO:0001501	skeletal system development	27/540	486/18862	0.00084907272455079	0.0406816583676074	0.0346332295540454	10019	27	SH2B3	GO
GO:0001501	skeletal system development	27/540	486/18862	0.00084907272455079	0.0406816583676074	0.0346332295540454	7157	27	TP53	GO
GO:0001501	skeletal system development	27/540	486/18862	0.00084907272455079	0.0406816583676074	0.0346332295540454	157506	27	RDH10	GO
GO:0001501	skeletal system development	27/540	486/18862	0.00084907272455079	0.0406816583676074	0.0346332295540454	10507	27	SEMA4D	GO
GO:0001501	skeletal system development	27/540	486/18862	0.00084907272455079	0.0406816583676074	0.0346332295540454	10143	27	CLEC3A	GO
GO:0001501	skeletal system development	27/540	486/18862	0.00084907272455079	0.0406816583676074	0.0346332295540454	4781	27	NFIB	GO
GO:0001501	skeletal system development	27/540	486/18862	0.00084907272455079	0.0406816583676074	0.0346332295540454	176	27	ACAN	GO
GO:0001501	skeletal system development	27/540	486/18862	0.00084907272455079	0.0406816583676074	0.0346332295540454	7474	27	WNT5A	GO
GO:0048511	rhythmic process	19/540	294/18862	0.000864920678626792	0.0409953801224398	0.0349003080849407	5728	19	PTEN	GO
GO:0048511	rhythmic process	19/540	294/18862	0.000864920678626792	0.0409953801224398	0.0349003080849407	5500	19	PPP1CB	GO
GO:0048511	rhythmic process	19/540	294/18862	0.000864920678626792	0.0409953801224398	0.0349003080849407	8473	19	OGT	GO
GO:0048511	rhythmic process	19/540	294/18862	0.000864920678626792	0.0409953801224398	0.0349003080849407	23435	19	TARDBP	GO
GO:0048511	rhythmic process	19/540	294/18862	0.000864920678626792	0.0409953801224398	0.0349003080849407	55294	19	FBXW7	GO
GO:0048511	rhythmic process	19/540	294/18862	0.000864920678626792	0.0409953801224398	0.0349003080849407	658	19	BMPR1B	GO
GO:0048511	rhythmic process	19/540	294/18862	0.000864920678626792	0.0409953801224398	0.0349003080849407	9099	19	USP2	GO
GO:0048511	rhythmic process	19/540	294/18862	0.000864920678626792	0.0409953801224398	0.0349003080849407	1457	19	CSNK2A1	GO
GO:0048511	rhythmic process	19/540	294/18862	0.000864920678626792	0.0409953801224398	0.0349003080849407	59338	19	PLEKHA1	GO
GO:0048511	rhythmic process	19/540	294/18862	0.000864920678626792	0.0409953801224398	0.0349003080849407	25819	19	NOCT	GO
GO:0048511	rhythmic process	19/540	294/18862	0.000864920678626792	0.0409953801224398	0.0349003080849407	5158	19	PDE6B	GO
GO:0048511	rhythmic process	19/540	294/18862	0.000864920678626792	0.0409953801224398	0.0349003080849407	835	19	CASP2	GO
GO:0048511	rhythmic process	19/540	294/18862	0.000864920678626792	0.0409953801224398	0.0349003080849407	6667	19	SP1	GO
GO:0048511	rhythmic process	19/540	294/18862	0.000864920678626792	0.0409953801224398	0.0349003080849407	7157	19	TP53	GO
GO:0048511	rhythmic process	19/540	294/18862	0.000864920678626792	0.0409953801224398	0.0349003080849407	1958	19	EGR1	GO
GO:0048511	rhythmic process	19/540	294/18862	0.000864920678626792	0.0409953801224398	0.0349003080849407	7166	19	TPH1	GO
GO:0048511	rhythmic process	19/540	294/18862	0.000864920678626792	0.0409953801224398	0.0349003080849407	23411	19	SIRT1	GO
GO:0048511	rhythmic process	19/540	294/18862	0.000864920678626792	0.0409953801224398	0.0349003080849407	9975	19	NR1D2	GO
GO:0048511	rhythmic process	19/540	294/18862	0.000864920678626792	0.0409953801224398	0.0349003080849407	191	19	AHCY	GO
GO:0009749	response to glucose	14/540	185/18862	0.000913287494557548	0.0422013817555145	0.0359270049571137	5728	14	PTEN	GO
GO:0009749	response to glucose	14/540	185/18862	0.000913287494557548	0.0422013817555145	0.0359270049571137	5208	14	PFKFB2	GO
GO:0009749	response to glucose	14/540	185/18862	0.000913287494557548	0.0422013817555145	0.0359270049571137	5530	14	PPP3CA	GO
GO:0009749	response to glucose	14/540	185/18862	0.000913287494557548	0.0422013817555145	0.0359270049571137	7074	14	TIAM1	GO
GO:0009749	response to glucose	14/540	185/18862	0.000913287494557548	0.0422013817555145	0.0359270049571137	4087	14	SMAD2	GO
GO:0009749	response to glucose	14/540	185/18862	0.000913287494557548	0.0422013817555145	0.0359270049571137	3480	14	IGF1R	GO
GO:0009749	response to glucose	14/540	185/18862	0.000913287494557548	0.0422013817555145	0.0359270049571137	387597	14	ILDR2	GO
GO:0009749	response to glucose	14/540	185/18862	0.000913287494557548	0.0422013817555145	0.0359270049571137	22841	14	RAB11FIP2	GO
GO:0009749	response to glucose	14/540	185/18862	0.000913287494557548	0.0422013817555145	0.0359270049571137	1946	14	EFNA5	GO
GO:0009749	response to glucose	14/540	185/18862	0.000913287494557548	0.0422013817555145	0.0359270049571137	6659	14	SOX4	GO
GO:0009749	response to glucose	14/540	185/18862	0.000913287494557548	0.0422013817555145	0.0359270049571137	2822	14	GPLD1	GO
GO:0009749	response to glucose	14/540	185/18862	0.000913287494557548	0.0422013817555145	0.0359270049571137	1958	14	EGR1	GO
GO:0009749	response to glucose	14/540	185/18862	0.000913287494557548	0.0422013817555145	0.0359270049571137	2850	14	GPR27	GO
GO:0009749	response to glucose	14/540	185/18862	0.000913287494557548	0.0422013817555145	0.0359270049571137	8609	14	KLF7	GO
GO:0035855	megakaryocyte development	4/540	16/18862	0.000919086354022094	0.0422013817555145	0.0359270049571137	10163	4	WASF2	GO
GO:0035855	megakaryocyte development	4/540	16/18862	0.000919086354022094	0.0422013817555145	0.0359270049571137	5469	4	MED1	GO
GO:0035855	megakaryocyte development	4/540	16/18862	0.000919086354022094	0.0422013817555145	0.0359270049571137	5305	4	PIP4K2A	GO
GO:0035855	megakaryocyte development	4/540	16/18862	0.000919086354022094	0.0422013817555145	0.0359270049571137	10019	4	SH2B3	GO
GO:0060977	coronary vasculature morphogenesis	4/540	16/18862	0.000919086354022094	0.0422013817555145	0.0359270049571137	196528	4	ARID2	GO
GO:0060977	coronary vasculature morphogenesis	4/540	16/18862	0.000919086354022094	0.0422013817555145	0.0359270049571137	7046	4	TGFBR1	GO
GO:0060977	coronary vasculature morphogenesis	4/540	16/18862	0.000919086354022094	0.0422013817555145	0.0359270049571137	10427	4	SEC24B	GO
GO:0060977	coronary vasculature morphogenesis	4/540	16/18862	0.000919086354022094	0.0422013817555145	0.0359270049571137	7049	4	TGFBR3	GO
GO:0098900	regulation of action potential	7/540	55/18862	0.000935810240191169	0.0425263045233265	0.0362036191674608	2258	7	FGF13	GO
GO:0098900	regulation of action potential	7/540	55/18862	0.000935810240191169	0.0425263045233265	0.0362036191674608	2332	7	FMR1	GO
GO:0098900	regulation of action potential	7/540	55/18862	0.000935810240191169	0.0425263045233265	0.0362036191674608	1739	7	DLG1	GO
GO:0098900	regulation of action potential	7/540	55/18862	0.000935810240191169	0.0425263045233265	0.0362036191674608	6262	7	RYR2	GO
GO:0098900	regulation of action potential	7/540	55/18862	0.000935810240191169	0.0425263045233265	0.0362036191674608	2257	7	FGF12	GO
GO:0098900	regulation of action potential	7/540	55/18862	0.000935810240191169	0.0425263045233265	0.0362036191674608	1525	7	CXADR	GO
GO:0098900	regulation of action potential	7/540	55/18862	0.000935810240191169	0.0425263045233265	0.0362036191674608	6331	7	SCN5A	GO
GO:1903362	regulation of cellular protein catabolic process	17/540	251/18862	0.00095393280377813	0.0429075081536122	0.0365281465678736	1452	17	CSNK1A1	GO
GO:1903362	regulation of cellular protein catabolic process	17/540	251/18862	0.00095393280377813	0.0429075081536122	0.0365281465678736	5728	17	PTEN	GO
GO:1903362	regulation of cellular protein catabolic process	17/540	251/18862	0.00095393280377813	0.0429075081536122	0.0365281465678736	8473	17	OGT	GO
GO:1903362	regulation of cellular protein catabolic process	17/540	251/18862	0.00095393280377813	0.0429075081536122	0.0365281465678736	2332	17	FMR1	GO
GO:1903362	regulation of cellular protein catabolic process	17/540	251/18862	0.00095393280377813	0.0429075081536122	0.0365281465678736	160418	17	TMTC3	GO
GO:1903362	regulation of cellular protein catabolic process	17/540	251/18862	0.00095393280377813	0.0429075081536122	0.0365281465678736	5962	17	RDX	GO
GO:1903362	regulation of cellular protein catabolic process	17/540	251/18862	0.00095393280377813	0.0429075081536122	0.0365281465678736	55294	17	FBXW7	GO
GO:1903362	regulation of cellular protein catabolic process	17/540	251/18862	0.00095393280377813	0.0429075081536122	0.0365281465678736	255488	17	RNF144B	GO
GO:1903362	regulation of cellular protein catabolic process	17/540	251/18862	0.00095393280377813	0.0429075081536122	0.0365281465678736	7430	17	EZR	GO
GO:1903362	regulation of cellular protein catabolic process	17/540	251/18862	0.00095393280377813	0.0429075081536122	0.0365281465678736	1457	17	CSNK2A1	GO
GO:1903362	regulation of cellular protein catabolic process	17/540	251/18862	0.00095393280377813	0.0429075081536122	0.0365281465678736	4745	17	NELL1	GO
GO:1903362	regulation of cellular protein catabolic process	17/540	251/18862	0.00095393280377813	0.0429075081536122	0.0365281465678736	5720	17	PSME1	GO
GO:1903362	regulation of cellular protein catabolic process	17/540	251/18862	0.00095393280377813	0.0429075081536122	0.0365281465678736	56893	17	UBQLN4	GO
GO:1903362	regulation of cellular protein catabolic process	17/540	251/18862	0.00095393280377813	0.0429075081536122	0.0365281465678736	5887	17	RAD23B	GO
GO:1903362	regulation of cellular protein catabolic process	17/540	251/18862	0.00095393280377813	0.0429075081536122	0.0365281465678736	1459	17	CSNK2A2	GO
GO:1903362	regulation of cellular protein catabolic process	17/540	251/18862	0.00095393280377813	0.0429075081536122	0.0365281465678736	29978	17	UBQLN2	GO
GO:1903362	regulation of cellular protein catabolic process	17/540	251/18862	0.00095393280377813	0.0429075081536122	0.0365281465678736	9532	17	BAG2	GO
GO:0006977	DNA damage response, signal transduction by p53 class mediator resulting in cell cycle arrest	7/540	56/18862	0.00104355423034333	0.0452313689445058	0.0385065025998575	5325	7	PLAGL1	GO
GO:0006977	DNA damage response, signal transduction by p53 class mediator resulting in cell cycle arrest	7/540	56/18862	0.00104355423034333	0.0452313689445058	0.0385065025998575	9125	7	CNOT9	GO
GO:0006977	DNA damage response, signal transduction by p53 class mediator resulting in cell cycle arrest	7/540	56/18862	0.00104355423034333	0.0452313689445058	0.0385065025998575	835	7	CASP2	GO
GO:0006977	DNA damage response, signal transduction by p53 class mediator resulting in cell cycle arrest	7/540	56/18862	0.00104355423034333	0.0452313689445058	0.0385065025998575	6659	7	SOX4	GO
GO:0006977	DNA damage response, signal transduction by p53 class mediator resulting in cell cycle arrest	7/540	56/18862	0.00104355423034333	0.0452313689445058	0.0385065025998575	57472	7	CNOT6	GO
GO:0006977	DNA damage response, signal transduction by p53 class mediator resulting in cell cycle arrest	7/540	56/18862	0.00104355423034333	0.0452313689445058	0.0385065025998575	7157	7	TP53	GO
GO:0006977	DNA damage response, signal transduction by p53 class mediator resulting in cell cycle arrest	7/540	56/18862	0.00104355423034333	0.0452313689445058	0.0385065025998575	4194	7	MDM4	GO
GO:0060541	respiratory system development	14/540	188/18862	0.00106726930653351	0.0452313689445058	0.0385065025998575	6431	14	SRSF6	GO
GO:0060541	respiratory system development	14/540	188/18862	0.00106726930653351	0.0452313689445058	0.0385065025998575	5154	14	PDGFA	GO
GO:0060541	respiratory system development	14/540	188/18862	0.00106726930653351	0.0452313689445058	0.0385065025998575	1977	14	EIF4E	GO
GO:0060541	respiratory system development	14/540	188/18862	0.00106726930653351	0.0452313689445058	0.0385065025998575	4087	14	SMAD2	GO
GO:0060541	respiratory system development	14/540	188/18862	0.00106726930653351	0.0452313689445058	0.0385065025998575	2254	14	FGF9	GO
GO:0060541	respiratory system development	14/540	188/18862	0.00106726930653351	0.0452313689445058	0.0385065025998575	55294	14	FBXW7	GO
GO:0060541	respiratory system development	14/540	188/18862	0.00106726930653351	0.0452313689445058	0.0385065025998575	10427	14	SEC24B	GO
GO:0060541	respiratory system development	14/540	188/18862	0.00106726930653351	0.0452313689445058	0.0385065025998575	83716	14	CRISPLD2	GO
GO:0060541	respiratory system development	14/540	188/18862	0.00106726930653351	0.0452313689445058	0.0385065025998575	79977	14	GRHL2	GO
GO:0060541	respiratory system development	14/540	188/18862	0.00106726930653351	0.0452313689445058	0.0385065025998575	10413	14	YAP1	GO
GO:0060541	respiratory system development	14/540	188/18862	0.00106726930653351	0.0452313689445058	0.0385065025998575	157506	14	RDH10	GO
GO:0060541	respiratory system development	14/540	188/18862	0.00106726930653351	0.0452313689445058	0.0385065025998575	4781	14	NFIB	GO
GO:0060541	respiratory system development	14/540	188/18862	0.00106726930653351	0.0452313689445058	0.0385065025998575	5594	14	MAPK1	GO
GO:0060541	respiratory system development	14/540	188/18862	0.00106726930653351	0.0452313689445058	0.0385065025998575	7474	14	WNT5A	GO
GO:0014066	regulation of phosphatidylinositol 3-kinase signaling	11/540	127/18862	0.00106797228206984	0.0452313689445058	0.0385065025998575	5728	11	PTEN	GO
GO:0014066	regulation of phosphatidylinositol 3-kinase signaling	11/540	127/18862	0.00106797228206984	0.0452313689445058	0.0385065025998575	5154	11	PDGFA	GO
GO:0014066	regulation of phosphatidylinositol 3-kinase signaling	11/540	127/18862	0.00106797228206984	0.0452313689445058	0.0385065025998575	3480	11	IGF1R	GO
GO:0014066	regulation of phosphatidylinositol 3-kinase signaling	11/540	127/18862	0.00106797228206984	0.0452313689445058	0.0385065025998575	4824	11	NKX3-1	GO
GO:0014066	regulation of phosphatidylinositol 3-kinase signaling	11/540	127/18862	0.00106797228206984	0.0452313689445058	0.0385065025998575	5527	11	PPP2R5C	GO
GO:0014066	regulation of phosphatidylinositol 3-kinase signaling	11/540	127/18862	0.00106797228206984	0.0452313689445058	0.0385065025998575	5270	11	SERPINE2	GO
GO:0014066	regulation of phosphatidylinositol 3-kinase signaling	11/540	127/18862	0.00106797228206984	0.0452313689445058	0.0385065025998575	5305	11	PIP4K2A	GO
GO:0014066	regulation of phosphatidylinositol 3-kinase signaling	11/540	127/18862	0.00106797228206984	0.0452313689445058	0.0385065025998575	10507	11	SEMA4D	GO
GO:0014066	regulation of phosphatidylinositol 3-kinase signaling	11/540	127/18862	0.00106797228206984	0.0452313689445058	0.0385065025998575	3643	11	INSR	GO
GO:0014066	regulation of phosphatidylinositol 3-kinase signaling	11/540	127/18862	0.00106797228206984	0.0452313689445058	0.0385065025998575	5594	11	MAPK1	GO
GO:0014066	regulation of phosphatidylinositol 3-kinase signaling	11/540	127/18862	0.00106797228206984	0.0452313689445058	0.0385065025998575	23411	11	SIRT1	GO
GO:0030968	endoplasmic reticulum unfolded protein response	11/540	127/18862	0.00106797228206984	0.0452313689445058	0.0385065025998575	55161	11	TMEM33	GO
GO:0030968	endoplasmic reticulum unfolded protein response	11/540	127/18862	0.00106797228206984	0.0452313689445058	0.0385065025998575	51283	11	BFAR	GO
GO:0030968	endoplasmic reticulum unfolded protein response	11/540	127/18862	0.00106797228206984	0.0452313689445058	0.0385065025998575	58477	11	SRPRB	GO
GO:0030968	endoplasmic reticulum unfolded protein response	11/540	127/18862	0.00106797228206984	0.0452313689445058	0.0385065025998575	51009	11	DERL2	GO
GO:0030968	endoplasmic reticulum unfolded protein response	11/540	127/18862	0.00106797228206984	0.0452313689445058	0.0385065025998575	55432	11	YOD1	GO
GO:0030968	endoplasmic reticulum unfolded protein response	11/540	127/18862	0.00106797228206984	0.0452313689445058	0.0385065025998575	90993	11	CREB3L1	GO
GO:0030968	endoplasmic reticulum unfolded protein response	11/540	127/18862	0.00106797228206984	0.0452313689445058	0.0385065025998575	5611	11	DNAJC3	GO
GO:0030968	endoplasmic reticulum unfolded protein response	11/540	127/18862	0.00106797228206984	0.0452313689445058	0.0385065025998575	9695	11	EDEM1	GO
GO:0030968	endoplasmic reticulum unfolded protein response	11/540	127/18862	0.00106797228206984	0.0452313689445058	0.0385065025998575	11153	11	FICD	GO
GO:0030968	endoplasmic reticulum unfolded protein response	11/540	127/18862	0.00106797228206984	0.0452313689445058	0.0385065025998575	1639	11	DCTN1	GO
GO:0030968	endoplasmic reticulum unfolded protein response	11/540	127/18862	0.00106797228206984	0.0452313689445058	0.0385065025998575	7094	11	TLN1	GO
GO:0034446	substrate adhesion-dependent cell spreading	10/540	108/18862	0.00107051373856311	0.0452313689445058	0.0385065025998575	80005	10	DOCK5	GO
GO:0034446	substrate adhesion-dependent cell spreading	10/540	108/18862	0.00107051373856311	0.0452313689445058	0.0385065025998575	6239	10	RREB1	GO
GO:0034446	substrate adhesion-dependent cell spreading	10/540	108/18862	0.00107051373856311	0.0452313689445058	0.0385065025998575	1946	10	EFNA5	GO
GO:0034446	substrate adhesion-dependent cell spreading	10/540	108/18862	0.00107051373856311	0.0452313689445058	0.0385065025998575	55604	10	CARMIL1	GO
GO:0034446	substrate adhesion-dependent cell spreading	10/540	108/18862	0.00107051373856311	0.0452313689445058	0.0385065025998575	2241	10	FER	GO
GO:0034446	substrate adhesion-dependent cell spreading	10/540	108/18862	0.00107051373856311	0.0452313689445058	0.0385065025998575	10461	10	MERTK	GO
GO:0034446	substrate adhesion-dependent cell spreading	10/540	108/18862	0.00107051373856311	0.0452313689445058	0.0385065025998575	2192	10	FBLN1	GO
GO:0034446	substrate adhesion-dependent cell spreading	10/540	108/18862	0.00107051373856311	0.0452313689445058	0.0385065025998575	4241	10	MELTF	GO
GO:0034446	substrate adhesion-dependent cell spreading	10/540	108/18862	0.00107051373856311	0.0452313689445058	0.0385065025998575	55435	10	AP1AR	GO
GO:0034446	substrate adhesion-dependent cell spreading	10/540	108/18862	0.00107051373856311	0.0452313689445058	0.0385065025998575	91663	10	MYADM	GO
GO:0071480	cellular response to gamma radiation	5/540	28/18862	0.00107509671404386	0.0452313689445058	0.0385065025998575	85453	5	TSPYL5	GO
GO:0071480	cellular response to gamma radiation	5/540	28/18862	0.00107509671404386	0.0452313689445058	0.0385065025998575	7157	5	TP53	GO
GO:0071480	cellular response to gamma radiation	5/540	28/18862	0.00107509671404386	0.0452313689445058	0.0385065025998575	1958	5	EGR1	GO
GO:0071480	cellular response to gamma radiation	5/540	28/18862	0.00107509671404386	0.0452313689445058	0.0385065025998575	10413	5	YAP1	GO
GO:0071480	cellular response to gamma radiation	5/540	28/18862	0.00107509671404386	0.0452313689445058	0.0385065025998575	2002	5	ELK1	GO
GO:1903035	negative regulation of response to wounding	9/540	90/18862	0.00109072412001813	0.0452313689445058	0.0385065025998575	6558	9	SLC12A2	GO
GO:1903035	negative regulation of response to wounding	9/540	90/18862	0.00109072412001813	0.0452313689445058	0.0385065025998575	5728	9	PTEN	GO
GO:1903035	negative regulation of response to wounding	9/540	90/18862	0.00109072412001813	0.0452313689445058	0.0385065025998575	5154	9	PDGFA	GO
GO:1903035	negative regulation of response to wounding	9/540	90/18862	0.00109072412001813	0.0452313689445058	0.0385065025998575	84830	9	ADTRP	GO
GO:1903035	negative regulation of response to wounding	9/540	90/18862	0.00109072412001813	0.0452313689445058	0.0385065025998575	4088	9	SMAD3	GO
GO:1903035	negative regulation of response to wounding	9/540	90/18862	0.00109072412001813	0.0452313689445058	0.0385065025998575	5270	9	SERPINE2	GO
GO:1903035	negative regulation of response to wounding	9/540	90/18862	0.00109072412001813	0.0452313689445058	0.0385065025998575	83481	9	EPPK1	GO
GO:1903035	negative regulation of response to wounding	9/540	90/18862	0.00109072412001813	0.0452313689445058	0.0385065025998575	10019	9	SH2B3	GO
GO:1903035	negative regulation of response to wounding	9/540	90/18862	0.00109072412001813	0.0452313689445058	0.0385065025998575	135228	9	CD109	GO
GO:0060537	muscle tissue development	22/540	371/18862	0.00109664150027289	0.0452313689445058	0.0385065025998575	5728	22	PTEN	GO
GO:0060537	muscle tissue development	22/540	371/18862	0.00109664150027289	0.0452313689445058	0.0385065025998575	196528	22	ARID2	GO
GO:0060537	muscle tissue development	22/540	371/18862	0.00109664150027289	0.0452313689445058	0.0385065025998575	5530	22	PPP3CA	GO
GO:0060537	muscle tissue development	22/540	371/18862	0.00109664150027289	0.0452313689445058	0.0385065025998575	7046	22	TGFBR1	GO
GO:0060537	muscle tissue development	22/540	371/18862	0.00109664150027289	0.0452313689445058	0.0385065025998575	5469	22	MED1	GO
GO:0060537	muscle tissue development	22/540	371/18862	0.00109664150027289	0.0452313689445058	0.0385065025998575	10521	22	DDX17	GO
GO:0060537	muscle tissue development	22/540	371/18862	0.00109664150027289	0.0452313689445058	0.0385065025998575	1739	22	DLG1	GO
GO:0060537	muscle tissue development	22/540	371/18862	0.00109664150027289	0.0452313689445058	0.0385065025998575	4088	22	SMAD3	GO
GO:0060537	muscle tissue development	22/540	371/18862	0.00109664150027289	0.0452313689445058	0.0385065025998575	7049	22	TGFBR3	GO
GO:0060537	muscle tissue development	22/540	371/18862	0.00109664150027289	0.0452313689445058	0.0385065025998575	6262	22	RYR2	GO
GO:0060537	muscle tissue development	22/540	371/18862	0.00109664150027289	0.0452313689445058	0.0385065025998575	10472	22	ZBTB18	GO
GO:0060537	muscle tissue development	22/540	371/18862	0.00109664150027289	0.0452313689445058	0.0385065025998575	1958	22	EGR1	GO
GO:0060537	muscle tissue development	22/540	371/18862	0.00109664150027289	0.0452313689445058	0.0385065025998575	10413	22	YAP1	GO
GO:0060537	muscle tissue development	22/540	371/18862	0.00109664150027289	0.0452313689445058	0.0385065025998575	3344	22	FOXN2	GO
GO:0060537	muscle tissue development	22/540	371/18862	0.00109664150027289	0.0452313689445058	0.0385065025998575	4625	22	MYH7	GO
GO:0060537	muscle tissue development	22/540	371/18862	0.00109664150027289	0.0452313689445058	0.0385065025998575	5594	22	MAPK1	GO
GO:0060537	muscle tissue development	22/540	371/18862	0.00109664150027289	0.0452313689445058	0.0385065025998575	56203	22	LMOD3	GO
GO:0060537	muscle tissue development	22/540	371/18862	0.00109664150027289	0.0452313689445058	0.0385065025998575	1525	22	CXADR	GO
GO:0060537	muscle tissue development	22/540	371/18862	0.00109664150027289	0.0452313689445058	0.0385065025998575	9975	22	NR1D2	GO
GO:0060537	muscle tissue development	22/540	371/18862	0.00109664150027289	0.0452313689445058	0.0385065025998575	56983	22	POGLUT1	GO
GO:0060537	muscle tissue development	22/540	371/18862	0.00109664150027289	0.0452313689445058	0.0385065025998575	7474	22	WNT5A	GO
GO:0060537	muscle tissue development	22/540	371/18862	0.00109664150027289	0.0452313689445058	0.0385065025998575	59269	22	HIVEP3	GO
GO:0070646	protein modification by small protein removal	19/540	300/18862	0.0010979483840885	0.0452313689445058	0.0385065025998575	5728	19	PTEN	GO
GO:0070646	protein modification by small protein removal	19/540	300/18862	0.0010979483840885	0.0452313689445058	0.0385065025998575	80124	19	VCPIP1	GO
GO:0070646	protein modification by small protein removal	19/540	300/18862	0.0010979483840885	0.0452313689445058	0.0385065025998575	8473	19	OGT	GO
GO:0070646	protein modification by small protein removal	19/540	300/18862	0.0010979483840885	0.0452313689445058	0.0385065025998575	7046	19	TGFBR1	GO
GO:0070646	protein modification by small protein removal	19/540	300/18862	0.0010979483840885	0.0452313689445058	0.0385065025998575	57478	19	USP31	GO
GO:0070646	protein modification by small protein removal	19/540	300/18862	0.0010979483840885	0.0452313689445058	0.0385065025998575	580	19	BARD1	GO
GO:0070646	protein modification by small protein removal	19/540	300/18862	0.0010979483840885	0.0452313689445058	0.0385065025998575	389856	19	USP27X	GO
GO:0070646	protein modification by small protein removal	19/540	300/18862	0.0010979483840885	0.0452313689445058	0.0385065025998575	51616	19	TAF9B	GO
GO:0070646	protein modification by small protein removal	19/540	300/18862	0.0010979483840885	0.0452313689445058	0.0385065025998575	4087	19	SMAD2	GO
GO:0070646	protein modification by small protein removal	19/540	300/18862	0.0010979483840885	0.0452313689445058	0.0385065025998575	9099	19	USP2	GO
GO:0070646	protein modification by small protein removal	19/540	300/18862	0.0010979483840885	0.0452313689445058	0.0385065025998575	55432	19	YOD1	GO
GO:0070646	protein modification by small protein removal	19/540	300/18862	0.0010979483840885	0.0452313689445058	0.0385065025998575	4088	19	SMAD3	GO
GO:0070646	protein modification by small protein removal	19/540	300/18862	0.0010979483840885	0.0452313689445058	0.0385065025998575	6737	19	TRIM21	GO
GO:0070646	protein modification by small protein removal	19/540	300/18862	0.0010979483840885	0.0452313689445058	0.0385065025998575	5720	19	PSME1	GO
GO:0070646	protein modification by small protein removal	19/540	300/18862	0.0010979483840885	0.0452313689445058	0.0385065025998575	7157	19	TP53	GO
GO:0070646	protein modification by small protein removal	19/540	300/18862	0.0010979483840885	0.0452313689445058	0.0385065025998575	5692	19	PSMB4	GO
GO:0070646	protein modification by small protein removal	19/540	300/18862	0.0010979483840885	0.0452313689445058	0.0385065025998575	205564	19	SENP5	GO
GO:0070646	protein modification by small protein removal	19/540	300/18862	0.0010979483840885	0.0452313689445058	0.0385065025998575	5887	19	RAD23B	GO
GO:0070646	protein modification by small protein removal	19/540	300/18862	0.0010979483840885	0.0452313689445058	0.0385065025998575	4194	19	MDM4	GO
GO:0016049	cell growth	26/540	470/18862	0.00111811740664993	0.0456357548936377	0.038850765640419	1499	26	CTNNB1	GO
GO:0016049	cell growth	26/540	470/18862	0.00111811740664993	0.0456357548936377	0.038850765640419	7074	26	TIAM1	GO
GO:0016049	cell growth	26/540	470/18862	0.00111811740664993	0.0456357548936377	0.038850765640419	7046	26	TGFBR1	GO
GO:0016049	cell growth	26/540	470/18862	0.00111811740664993	0.0456357548936377	0.038850765640419	51616	26	TAF9B	GO
GO:0016049	cell growth	26/540	470/18862	0.00111811740664993	0.0456357548936377	0.038850765640419	102	26	ADAM10	GO
GO:0016049	cell growth	26/540	470/18862	0.00111811740664993	0.0456357548936377	0.038850765640419	2258	26	FGF13	GO
GO:0016049	cell growth	26/540	470/18862	0.00111811740664993	0.0456357548936377	0.038850765640419	201163	26	FLCN	GO
GO:0016049	cell growth	26/540	470/18862	0.00111811740664993	0.0456357548936377	0.038850765640419	51009	26	DERL2	GO
GO:0016049	cell growth	26/540	470/18862	0.00111811740664993	0.0456357548936377	0.038850765640419	131566	26	DCBLD2	GO
GO:0016049	cell growth	26/540	470/18862	0.00111811740664993	0.0456357548936377	0.038850765640419	1457	26	CSNK2A1	GO
GO:0016049	cell growth	26/540	470/18862	0.00111811740664993	0.0456357548936377	0.038850765640419	26153	26	KIF26A	GO
GO:0016049	cell growth	26/540	470/18862	0.00111811740664993	0.0456357548936377	0.038850765640419	6049	26	RNF6	GO
GO:0016049	cell growth	26/540	470/18862	0.00111811740664993	0.0456357548936377	0.038850765640419	4088	26	SMAD3	GO
GO:0016049	cell growth	26/540	470/18862	0.00111811740664993	0.0456357548936377	0.038850765640419	5270	26	SERPINE2	GO
GO:0016049	cell growth	26/540	470/18862	0.00111811740664993	0.0456357548936377	0.038850765640419	9706	26	ULK2	GO
GO:0016049	cell growth	26/540	470/18862	0.00111811740664993	0.0456357548936377	0.038850765640419	7157	26	TP53	GO
GO:0016049	cell growth	26/540	470/18862	0.00111811740664993	0.0456357548936377	0.038850765640419	1808	26	DPYSL2	GO
GO:0016049	cell growth	26/540	470/18862	0.00111811740664993	0.0456357548936377	0.038850765640419	23011	26	RAB21	GO
GO:0016049	cell growth	26/540	470/18862	0.00111811740664993	0.0456357548936377	0.038850765640419	2017	26	CTTN	GO
GO:0016049	cell growth	26/540	470/18862	0.00111811740664993	0.0456357548936377	0.038850765640419	4131	26	MAP1B	GO
GO:0016049	cell growth	26/540	470/18862	0.00111811740664993	0.0456357548936377	0.038850765640419	10507	26	SEMA4D	GO
GO:0016049	cell growth	26/540	470/18862	0.00111811740664993	0.0456357548936377	0.038850765640419	10298	26	PAK4	GO
GO:0016049	cell growth	26/540	470/18862	0.00111811740664993	0.0456357548936377	0.038850765640419	23411	26	SIRT1	GO
GO:0016049	cell growth	26/540	470/18862	0.00111811740664993	0.0456357548936377	0.038850765640419	5361	26	PLXNA1	GO
GO:0016049	cell growth	26/540	470/18862	0.00111811740664993	0.0456357548936377	0.038850765640419	7474	26	WNT5A	GO
GO:0016049	cell growth	26/540	470/18862	0.00111811740664993	0.0456357548936377	0.038850765640419	23111	26	SPART	GO
GO:0071774	response to fibroblast growth factor	12/540	148/18862	0.00115060971008321	0.0456860616989749	0.0388935929785189	3187	12	HNRNPH1	GO
GO:0071774	response to fibroblast growth factor	12/540	148/18862	0.00115060971008321	0.0456860616989749	0.0388935929785189	2254	12	FGF9	GO
GO:0071774	response to fibroblast growth factor	12/540	148/18862	0.00115060971008321	0.0456860616989749	0.0388935929785189	6997	12	TDGF1	GO
GO:0071774	response to fibroblast growth factor	12/540	148/18862	0.00115060971008321	0.0456860616989749	0.0388935929785189	7073	12	TIAL1	GO
GO:0071774	response to fibroblast growth factor	12/540	148/18862	0.00115060971008321	0.0456860616989749	0.0388935929785189	90993	12	CREB3L1	GO
GO:0071774	response to fibroblast growth factor	12/540	148/18862	0.00115060971008321	0.0456860616989749	0.0388935929785189	2257	12	FGF12	GO
GO:0071774	response to fibroblast growth factor	12/540	148/18862	0.00115060971008321	0.0456860616989749	0.0388935929785189	7072	12	TIA1	GO
GO:0071774	response to fibroblast growth factor	12/540	148/18862	0.00115060971008321	0.0456860616989749	0.0388935929785189	678	12	ZFP36L2	GO
GO:0071774	response to fibroblast growth factor	12/540	148/18862	0.00115060971008321	0.0456860616989749	0.0388935929785189	2885	12	GRB2	GO
GO:0071774	response to fibroblast growth factor	12/540	148/18862	0.00115060971008321	0.0456860616989749	0.0388935929785189	5594	12	MAPK1	GO
GO:0071774	response to fibroblast growth factor	12/540	148/18862	0.00115060971008321	0.0456860616989749	0.0388935929785189	2002	12	ELK1	GO
GO:0071774	response to fibroblast growth factor	12/540	148/18862	0.00115060971008321	0.0456860616989749	0.0388935929785189	7474	12	WNT5A	GO
GO:0032387	negative regulation of intracellular transport	7/540	57/18862	0.00116080737529156	0.0456860616989749	0.0388935929785189	9530	7	BAG4	GO
GO:0032387	negative regulation of intracellular transport	7/540	57/18862	0.00116080737529156	0.0456860616989749	0.0388935929785189	580	7	BARD1	GO
GO:0032387	negative regulation of intracellular transport	7/540	57/18862	0.00116080737529156	0.0456860616989749	0.0388935929785189	51009	7	DERL2	GO
GO:0032387	negative regulation of intracellular transport	7/540	57/18862	0.00116080737529156	0.0456860616989749	0.0388935929785189	392	7	ARHGAP1	GO
GO:0032387	negative regulation of intracellular transport	7/540	57/18862	0.00116080737529156	0.0456860616989749	0.0388935929785189	11261	7	CHP1	GO
GO:0032387	negative regulation of intracellular transport	7/540	57/18862	0.00116080737529156	0.0456860616989749	0.0388935929785189	55432	7	YOD1	GO
GO:0032387	negative regulation of intracellular transport	7/540	57/18862	0.00116080737529156	0.0456860616989749	0.0388935929785189	4131	7	MAP1B	GO
GO:0072431	signal transduction involved in mitotic G1 DNA damage checkpoint	7/540	57/18862	0.00116080737529156	0.0456860616989749	0.0388935929785189	5325	7	PLAGL1	GO
GO:0072431	signal transduction involved in mitotic G1 DNA damage checkpoint	7/540	57/18862	0.00116080737529156	0.0456860616989749	0.0388935929785189	9125	7	CNOT9	GO
GO:0072431	signal transduction involved in mitotic G1 DNA damage checkpoint	7/540	57/18862	0.00116080737529156	0.0456860616989749	0.0388935929785189	835	7	CASP2	GO
GO:0072431	signal transduction involved in mitotic G1 DNA damage checkpoint	7/540	57/18862	0.00116080737529156	0.0456860616989749	0.0388935929785189	6659	7	SOX4	GO
GO:0072431	signal transduction involved in mitotic G1 DNA damage checkpoint	7/540	57/18862	0.00116080737529156	0.0456860616989749	0.0388935929785189	57472	7	CNOT6	GO
GO:0072431	signal transduction involved in mitotic G1 DNA damage checkpoint	7/540	57/18862	0.00116080737529156	0.0456860616989749	0.0388935929785189	7157	7	TP53	GO
GO:0072431	signal transduction involved in mitotic G1 DNA damage checkpoint	7/540	57/18862	0.00116080737529156	0.0456860616989749	0.0388935929785189	4194	7	MDM4	GO
GO:1902400	intracellular signal transduction involved in G1 DNA damage checkpoint	7/540	57/18862	0.00116080737529156	0.0456860616989749	0.0388935929785189	5325	7	PLAGL1	GO
GO:1902400	intracellular signal transduction involved in G1 DNA damage checkpoint	7/540	57/18862	0.00116080737529156	0.0456860616989749	0.0388935929785189	9125	7	CNOT9	GO
GO:1902400	intracellular signal transduction involved in G1 DNA damage checkpoint	7/540	57/18862	0.00116080737529156	0.0456860616989749	0.0388935929785189	835	7	CASP2	GO
GO:1902400	intracellular signal transduction involved in G1 DNA damage checkpoint	7/540	57/18862	0.00116080737529156	0.0456860616989749	0.0388935929785189	6659	7	SOX4	GO
GO:1902400	intracellular signal transduction involved in G1 DNA damage checkpoint	7/540	57/18862	0.00116080737529156	0.0456860616989749	0.0388935929785189	57472	7	CNOT6	GO
GO:1902400	intracellular signal transduction involved in G1 DNA damage checkpoint	7/540	57/18862	0.00116080737529156	0.0456860616989749	0.0388935929785189	7157	7	TP53	GO
GO:1902400	intracellular signal transduction involved in G1 DNA damage checkpoint	7/540	57/18862	0.00116080737529156	0.0456860616989749	0.0388935929785189	4194	7	MDM4	GO
GO:0060602	branch elongation of an epithelium	4/540	17/18862	0.00117486598193913	0.0456881469684163	0.0388953682162585	5469	4	MED1	GO
GO:0060602	branch elongation of an epithelium	4/540	17/18862	0.00117486598193913	0.0456881469684163	0.0388953682162585	10413	4	YAP1	GO
GO:0060602	branch elongation of an epithelium	4/540	17/18862	0.00117486598193913	0.0456881469684163	0.0388953682162585	157506	4	RDH10	GO
GO:0060602	branch elongation of an epithelium	4/540	17/18862	0.00117486598193913	0.0456881469684163	0.0388953682162585	7474	4	WNT5A	GO
GO:0009746	response to hexose	14/540	190/18862	0.00118159000780387	0.0456881469684163	0.0388953682162585	5728	14	PTEN	GO
GO:0009746	response to hexose	14/540	190/18862	0.00118159000780387	0.0456881469684163	0.0388953682162585	5208	14	PFKFB2	GO
GO:0009746	response to hexose	14/540	190/18862	0.00118159000780387	0.0456881469684163	0.0388953682162585	5530	14	PPP3CA	GO
GO:0009746	response to hexose	14/540	190/18862	0.00118159000780387	0.0456881469684163	0.0388953682162585	7074	14	TIAM1	GO
GO:0009746	response to hexose	14/540	190/18862	0.00118159000780387	0.0456881469684163	0.0388953682162585	4087	14	SMAD2	GO
GO:0009746	response to hexose	14/540	190/18862	0.00118159000780387	0.0456881469684163	0.0388953682162585	3480	14	IGF1R	GO
GO:0009746	response to hexose	14/540	190/18862	0.00118159000780387	0.0456881469684163	0.0388953682162585	387597	14	ILDR2	GO
GO:0009746	response to hexose	14/540	190/18862	0.00118159000780387	0.0456881469684163	0.0388953682162585	22841	14	RAB11FIP2	GO
GO:0009746	response to hexose	14/540	190/18862	0.00118159000780387	0.0456881469684163	0.0388953682162585	1946	14	EFNA5	GO
GO:0009746	response to hexose	14/540	190/18862	0.00118159000780387	0.0456881469684163	0.0388953682162585	6659	14	SOX4	GO
GO:0009746	response to hexose	14/540	190/18862	0.00118159000780387	0.0456881469684163	0.0388953682162585	2822	14	GPLD1	GO
GO:0009746	response to hexose	14/540	190/18862	0.00118159000780387	0.0456881469684163	0.0388953682162585	1958	14	EGR1	GO
GO:0009746	response to hexose	14/540	190/18862	0.00118159000780387	0.0456881469684163	0.0388953682162585	2850	14	GPR27	GO
GO:0009746	response to hexose	14/540	190/18862	0.00118159000780387	0.0456881469684163	0.0388953682162585	8609	14	KLF7	GO
GO:0030970	retrograde protein transport, ER to cytosol	5/540	29/18862	0.00126884606195942	0.048216150354458	0.0410475155252752	6400	5	SEL1L	GO
GO:0030970	retrograde protein transport, ER to cytosol	5/540	29/18862	0.00126884606195942	0.048216150354458	0.0410475155252752	51009	5	DERL2	GO
GO:0030970	retrograde protein transport, ER to cytosol	5/540	29/18862	0.00126884606195942	0.048216150354458	0.0410475155252752	55432	5	YOD1	GO
GO:0030970	retrograde protein transport, ER to cytosol	5/540	29/18862	0.00126884606195942	0.048216150354458	0.0410475155252752	55666	5	NPLOC4	GO
GO:0030970	retrograde protein transport, ER to cytosol	5/540	29/18862	0.00126884606195942	0.048216150354458	0.0410475155252752	9695	5	EDEM1	GO
GO:1903513	endoplasmic reticulum to cytosol transport	5/540	29/18862	0.00126884606195942	0.048216150354458	0.0410475155252752	6400	5	SEL1L	GO
GO:1903513	endoplasmic reticulum to cytosol transport	5/540	29/18862	0.00126884606195942	0.048216150354458	0.0410475155252752	51009	5	DERL2	GO
GO:1903513	endoplasmic reticulum to cytosol transport	5/540	29/18862	0.00126884606195942	0.048216150354458	0.0410475155252752	55432	5	YOD1	GO
GO:1903513	endoplasmic reticulum to cytosol transport	5/540	29/18862	0.00126884606195942	0.048216150354458	0.0410475155252752	55666	5	NPLOC4	GO
GO:1903513	endoplasmic reticulum to cytosol transport	5/540	29/18862	0.00126884606195942	0.048216150354458	0.0410475155252752	9695	5	EDEM1	GO
GO:0030048	actin filament-based movement	12/540	150/18862	0.00129222494401714	0.0483769564341283	0.041184413431958	2258	12	FGF13	GO
GO:0030048	actin filament-based movement	12/540	150/18862	0.00129222494401714	0.0483769564341283	0.041184413431958	4645	12	MYO5B	GO
GO:0030048	actin filament-based movement	12/540	150/18862	0.00129222494401714	0.0483769564341283	0.041184413431958	10163	12	WASF2	GO
GO:0030048	actin filament-based movement	12/540	150/18862	0.00129222494401714	0.0483769564341283	0.041184413431958	783	12	CACNB2	GO
GO:0030048	actin filament-based movement	12/540	150/18862	0.00129222494401714	0.0483769564341283	0.041184413431958	1739	12	DLG1	GO
GO:0030048	actin filament-based movement	12/540	150/18862	0.00129222494401714	0.0483769564341283	0.041184413431958	1756	12	DMD	GO
GO:0030048	actin filament-based movement	12/540	150/18862	0.00129222494401714	0.0483769564341283	0.041184413431958	6262	12	RYR2	GO
GO:0030048	actin filament-based movement	12/540	150/18862	0.00129222494401714	0.0483769564341283	0.041184413431958	2257	12	FGF12	GO
GO:0030048	actin filament-based movement	12/540	150/18862	0.00129222494401714	0.0483769564341283	0.041184413431958	4625	12	MYH7	GO
GO:0030048	actin filament-based movement	12/540	150/18862	0.00129222494401714	0.0483769564341283	0.041184413431958	6331	12	SCN5A	GO
GO:0030048	actin filament-based movement	12/540	150/18862	0.00129222494401714	0.0483769564341283	0.041184413431958	4641	12	MYO1C	GO
GO:0030048	actin filament-based movement	12/540	150/18862	0.00129222494401714	0.0483769564341283	0.041184413431958	4650	12	MYO9B	GO
GO:0010506	regulation of autophagy	20/540	328/18862	0.00130254717985192	0.0483769564341283	0.041184413431958	9554	20	SEC22B	GO
GO:0010506	regulation of autophagy	20/540	328/18862	0.00130254717985192	0.0483769564341283	0.041184413431958	55294	20	FBXW7	GO
GO:0010506	regulation of autophagy	20/540	328/18862	0.00130254717985192	0.0483769564341283	0.041184413431958	143686	20	SESN3	GO
GO:0010506	regulation of autophagy	20/540	328/18862	0.00130254717985192	0.0483769564341283	0.041184413431958	201163	20	FLCN	GO
GO:0010506	regulation of autophagy	20/540	328/18862	0.00130254717985192	0.0483769564341283	0.041184413431958	6737	20	TRIM21	GO
GO:0010506	regulation of autophagy	20/540	328/18862	0.00130254717985192	0.0483769564341283	0.041184413431958	9711	20	RUBCN	GO
GO:0010506	regulation of autophagy	20/540	328/18862	0.00130254717985192	0.0483769564341283	0.041184413431958	5305	20	PIP4K2A	GO
GO:0010506	regulation of autophagy	20/540	328/18862	0.00130254717985192	0.0483769564341283	0.041184413431958	7157	20	TP53	GO
GO:0010506	regulation of autophagy	20/540	328/18862	0.00130254717985192	0.0483769564341283	0.041184413431958	56893	20	UBQLN4	GO
GO:0010506	regulation of autophagy	20/540	328/18862	0.00130254717985192	0.0483769564341283	0.041184413431958	2017	20	CTTN	GO
GO:0010506	regulation of autophagy	20/540	328/18862	0.00130254717985192	0.0483769564341283	0.041184413431958	201292	20	TRIM65	GO
GO:0010506	regulation of autophagy	20/540	328/18862	0.00130254717985192	0.0483769564341283	0.041184413431958	1459	20	CSNK2A2	GO
GO:0010506	regulation of autophagy	20/540	328/18862	0.00130254717985192	0.0483769564341283	0.041184413431958	11040	20	PIM2	GO
GO:0010506	regulation of autophagy	20/540	328/18862	0.00130254717985192	0.0483769564341283	0.041184413431958	23411	20	SIRT1	GO
GO:0010506	regulation of autophagy	20/540	328/18862	0.00130254717985192	0.0483769564341283	0.041184413431958	11180	20	WDR6	GO
GO:0010506	regulation of autophagy	20/540	328/18862	0.00130254717985192	0.0483769564341283	0.041184413431958	29978	20	UBQLN2	GO
GO:0010506	regulation of autophagy	20/540	328/18862	0.00130254717985192	0.0483769564341283	0.041184413431958	10475	20	TRIM38	GO
GO:0010506	regulation of autophagy	20/540	328/18862	0.00130254717985192	0.0483769564341283	0.041184413431958	79443	20	FYCO1	GO
GO:0010506	regulation of autophagy	20/540	328/18862	0.00130254717985192	0.0483769564341283	0.041184413431958	220441	20	RNF152	GO
GO:0010506	regulation of autophagy	20/540	328/18862	0.00130254717985192	0.0483769564341283	0.041184413431958	140710	20	SOGA1	GO
GO:0048015	phosphatidylinositol-mediated signaling	14/540	192/18862	0.00130600222678341	0.0483769564341283	0.041184413431958	5728	14	PTEN	GO
GO:0048015	phosphatidylinositol-mediated signaling	14/540	192/18862	0.00130600222678341	0.0483769564341283	0.041184413431958	8473	14	OGT	GO
GO:0048015	phosphatidylinositol-mediated signaling	14/540	192/18862	0.00130600222678341	0.0483769564341283	0.041184413431958	5154	14	PDGFA	GO
GO:0048015	phosphatidylinositol-mediated signaling	14/540	192/18862	0.00130600222678341	0.0483769564341283	0.041184413431958	3480	14	IGF1R	GO
GO:0048015	phosphatidylinositol-mediated signaling	14/540	192/18862	0.00130600222678341	0.0483769564341283	0.041184413431958	4824	14	NKX3-1	GO
GO:0048015	phosphatidylinositol-mediated signaling	14/540	192/18862	0.00130600222678341	0.0483769564341283	0.041184413431958	7430	14	EZR	GO
GO:0048015	phosphatidylinositol-mediated signaling	14/540	192/18862	0.00130600222678341	0.0483769564341283	0.041184413431958	5527	14	PPP2R5C	GO
GO:0048015	phosphatidylinositol-mediated signaling	14/540	192/18862	0.00130600222678341	0.0483769564341283	0.041184413431958	5270	14	SERPINE2	GO
GO:0048015	phosphatidylinositol-mediated signaling	14/540	192/18862	0.00130600222678341	0.0483769564341283	0.041184413431958	59338	14	PLEKHA1	GO
GO:0048015	phosphatidylinositol-mediated signaling	14/540	192/18862	0.00130600222678341	0.0483769564341283	0.041184413431958	5305	14	PIP4K2A	GO
GO:0048015	phosphatidylinositol-mediated signaling	14/540	192/18862	0.00130600222678341	0.0483769564341283	0.041184413431958	10507	14	SEMA4D	GO
GO:0048015	phosphatidylinositol-mediated signaling	14/540	192/18862	0.00130600222678341	0.0483769564341283	0.041184413431958	3643	14	INSR	GO
GO:0048015	phosphatidylinositol-mediated signaling	14/540	192/18862	0.00130600222678341	0.0483769564341283	0.041184413431958	5594	14	MAPK1	GO
GO:0048015	phosphatidylinositol-mediated signaling	14/540	192/18862	0.00130600222678341	0.0483769564341283	0.041184413431958	23411	14	SIRT1	GO
GO:0032543	mitochondrial translation	31/578	134/18862	6.95074577445265e-19	2.70592532999442e-15	2.57616588124714e-15	115416	31	MALSU1	GV/MI
GO:0032543	mitochondrial translation	31/578	134/18862	6.95074577445265e-19	2.70592532999442e-15	2.57616588124714e-15	64979	31	MRPL36	GV/MI
GO:0032543	mitochondrial translation	31/578	134/18862	6.95074577445265e-19	2.70592532999442e-15	2.57616588124714e-15	51258	31	MRPL51	GV/MI
GO:0032543	mitochondrial translation	31/578	134/18862	6.95074577445265e-19	2.70592532999442e-15	2.57616588124714e-15	26589	31	MRPL46	GV/MI
GO:0032543	mitochondrial translation	31/578	134/18862	6.95074577445265e-19	2.70592532999442e-15	2.57616588124714e-15	28958	31	COA3	GV/MI
GO:0032543	mitochondrial translation	31/578	134/18862	6.95074577445265e-19	2.70592532999442e-15	2.57616588124714e-15	55168	31	MRPS18A	GV/MI
GO:0032543	mitochondrial translation	31/578	134/18862	6.95074577445265e-19	2.70592532999442e-15	2.57616588124714e-15	10102	31	TSFM	GV/MI
GO:0032543	mitochondrial translation	31/578	134/18862	6.95074577445265e-19	2.70592532999442e-15	2.57616588124714e-15	64928	31	MRPL14	GV/MI
GO:0032543	mitochondrial translation	31/578	134/18862	6.95074577445265e-19	2.70592532999442e-15	2.57616588124714e-15	3396	31	MRPL58	GV/MI
GO:0032543	mitochondrial translation	31/578	134/18862	6.95074577445265e-19	2.70592532999442e-15	2.57616588124714e-15	64963	31	MRPS11	GV/MI
GO:0032543	mitochondrial translation	31/578	134/18862	6.95074577445265e-19	2.70592532999442e-15	2.57616588124714e-15	26164	31	MTG2	GV/MI
GO:0032543	mitochondrial translation	31/578	134/18862	6.95074577445265e-19	2.70592532999442e-15	2.57616588124714e-15	64975	31	MRPL41	GV/MI
GO:0032543	mitochondrial translation	31/578	134/18862	6.95074577445265e-19	2.70592532999442e-15	2.57616588124714e-15	65003	31	MRPL11	GV/MI
GO:0032543	mitochondrial translation	31/578	134/18862	6.95074577445265e-19	2.70592532999442e-15	2.57616588124714e-15	29093	31	MRPL22	GV/MI
GO:0032543	mitochondrial translation	31/578	134/18862	6.95074577445265e-19	2.70592532999442e-15	2.57616588124714e-15	51081	31	MRPS7	GV/MI
GO:0032543	mitochondrial translation	31/578	134/18862	6.95074577445265e-19	2.70592532999442e-15	2.57616588124714e-15	51264	31	MRPL27	GV/MI
GO:0032543	mitochondrial translation	31/578	134/18862	6.95074577445265e-19	2.70592532999442e-15	2.57616588124714e-15	55052	31	MRPL20	GV/MI
GO:0032543	mitochondrial translation	31/578	134/18862	6.95074577445265e-19	2.70592532999442e-15	2.57616588124714e-15	29088	31	MRPL15	GV/MI
GO:0032543	mitochondrial translation	31/578	134/18862	6.95074577445265e-19	2.70592532999442e-15	2.57616588124714e-15	708	31	C1QBP	GV/MI
GO:0032543	mitochondrial translation	31/578	134/18862	6.95074577445265e-19	2.70592532999442e-15	2.57616588124714e-15	116541	31	MRPL54	GV/MI
GO:0032543	mitochondrial translation	31/578	134/18862	6.95074577445265e-19	2.70592532999442e-15	2.57616588124714e-15	64960	31	MRPS15	GV/MI
GO:0032543	mitochondrial translation	31/578	134/18862	6.95074577445265e-19	2.70592532999442e-15	2.57616588124714e-15	124454	31	EARS2	GV/MI
GO:0032543	mitochondrial translation	31/578	134/18862	6.95074577445265e-19	2.70592532999442e-15	2.57616588124714e-15	7284	31	TUFM	GV/MI
GO:0032543	mitochondrial translation	31/578	134/18862	6.95074577445265e-19	2.70592532999442e-15	2.57616588124714e-15	285367	31	RPUSD3	GV/MI
GO:0032543	mitochondrial translation	31/578	134/18862	6.95074577445265e-19	2.70592532999442e-15	2.57616588124714e-15	122704	31	MRPL52	GV/MI
GO:0032543	mitochondrial translation	31/578	134/18862	6.95074577445265e-19	2.70592532999442e-15	2.57616588124714e-15	84881	31	RPUSD4	GV/MI
GO:0032543	mitochondrial translation	31/578	134/18862	6.95074577445265e-19	2.70592532999442e-15	2.57616588124714e-15	6183	31	MRPS12	GV/MI
GO:0032543	mitochondrial translation	31/578	134/18862	6.95074577445265e-19	2.70592532999442e-15	2.57616588124714e-15	57129	31	MRPL47	GV/MI
GO:0032543	mitochondrial translation	31/578	134/18862	6.95074577445265e-19	2.70592532999442e-15	2.57616588124714e-15	84769	31	MPV17L2	GV/MI
GO:0032543	mitochondrial translation	31/578	134/18862	6.95074577445265e-19	2.70592532999442e-15	2.57616588124714e-15	84311	31	MRPL45	GV/MI
GO:0032543	mitochondrial translation	31/578	134/18862	6.95074577445265e-19	2.70592532999442e-15	2.57616588124714e-15	54998	31	AURKAIP1	GV/MI
GO:0140053	mitochondrial gene expression	32/578	165/18862	4.85885468712701e-17	9.45776064849272e-14	9.00422492282853e-14	115416	32	MALSU1	GV/MI
GO:0140053	mitochondrial gene expression	32/578	165/18862	4.85885468712701e-17	9.45776064849272e-14	9.00422492282853e-14	64979	32	MRPL36	GV/MI
GO:0140053	mitochondrial gene expression	32/578	165/18862	4.85885468712701e-17	9.45776064849272e-14	9.00422492282853e-14	51258	32	MRPL51	GV/MI
GO:0140053	mitochondrial gene expression	32/578	165/18862	4.85885468712701e-17	9.45776064849272e-14	9.00422492282853e-14	26589	32	MRPL46	GV/MI
GO:0140053	mitochondrial gene expression	32/578	165/18862	4.85885468712701e-17	9.45776064849272e-14	9.00422492282853e-14	28958	32	COA3	GV/MI
GO:0140053	mitochondrial gene expression	32/578	165/18862	4.85885468712701e-17	9.45776064849272e-14	9.00422492282853e-14	55168	32	MRPS18A	GV/MI
GO:0140053	mitochondrial gene expression	32/578	165/18862	4.85885468712701e-17	9.45776064849272e-14	9.00422492282853e-14	10102	32	TSFM	GV/MI
GO:0140053	mitochondrial gene expression	32/578	165/18862	4.85885468712701e-17	9.45776064849272e-14	9.00422492282853e-14	64928	32	MRPL14	GV/MI
GO:0140053	mitochondrial gene expression	32/578	165/18862	4.85885468712701e-17	9.45776064849272e-14	9.00422492282853e-14	3396	32	MRPL58	GV/MI
GO:0140053	mitochondrial gene expression	32/578	165/18862	4.85885468712701e-17	9.45776064849272e-14	9.00422492282853e-14	64963	32	MRPS11	GV/MI
GO:0140053	mitochondrial gene expression	32/578	165/18862	4.85885468712701e-17	9.45776064849272e-14	9.00422492282853e-14	26164	32	MTG2	GV/MI
GO:0140053	mitochondrial gene expression	32/578	165/18862	4.85885468712701e-17	9.45776064849272e-14	9.00422492282853e-14	64975	32	MRPL41	GV/MI
GO:0140053	mitochondrial gene expression	32/578	165/18862	4.85885468712701e-17	9.45776064849272e-14	9.00422492282853e-14	65003	32	MRPL11	GV/MI
GO:0140053	mitochondrial gene expression	32/578	165/18862	4.85885468712701e-17	9.45776064849272e-14	9.00422492282853e-14	29093	32	MRPL22	GV/MI
GO:0140053	mitochondrial gene expression	32/578	165/18862	4.85885468712701e-17	9.45776064849272e-14	9.00422492282853e-14	51081	32	MRPS7	GV/MI
GO:0140053	mitochondrial gene expression	32/578	165/18862	4.85885468712701e-17	9.45776064849272e-14	9.00422492282853e-14	51264	32	MRPL27	GV/MI
GO:0140053	mitochondrial gene expression	32/578	165/18862	4.85885468712701e-17	9.45776064849272e-14	9.00422492282853e-14	55052	32	MRPL20	GV/MI
GO:0140053	mitochondrial gene expression	32/578	165/18862	4.85885468712701e-17	9.45776064849272e-14	9.00422492282853e-14	29088	32	MRPL15	GV/MI
GO:0140053	mitochondrial gene expression	32/578	165/18862	4.85885468712701e-17	9.45776064849272e-14	9.00422492282853e-14	708	32	C1QBP	GV/MI
GO:0140053	mitochondrial gene expression	32/578	165/18862	4.85885468712701e-17	9.45776064849272e-14	9.00422492282853e-14	116541	32	MRPL54	GV/MI
GO:0140053	mitochondrial gene expression	32/578	165/18862	4.85885468712701e-17	9.45776064849272e-14	9.00422492282853e-14	64960	32	MRPS15	GV/MI
GO:0140053	mitochondrial gene expression	32/578	165/18862	4.85885468712701e-17	9.45776064849272e-14	9.00422492282853e-14	9238	32	TBRG4	GV/MI
GO:0140053	mitochondrial gene expression	32/578	165/18862	4.85885468712701e-17	9.45776064849272e-14	9.00422492282853e-14	124454	32	EARS2	GV/MI
GO:0140053	mitochondrial gene expression	32/578	165/18862	4.85885468712701e-17	9.45776064849272e-14	9.00422492282853e-14	7284	32	TUFM	GV/MI
GO:0140053	mitochondrial gene expression	32/578	165/18862	4.85885468712701e-17	9.45776064849272e-14	9.00422492282853e-14	285367	32	RPUSD3	GV/MI
GO:0140053	mitochondrial gene expression	32/578	165/18862	4.85885468712701e-17	9.45776064849272e-14	9.00422492282853e-14	122704	32	MRPL52	GV/MI
GO:0140053	mitochondrial gene expression	32/578	165/18862	4.85885468712701e-17	9.45776064849272e-14	9.00422492282853e-14	84881	32	RPUSD4	GV/MI
GO:0140053	mitochondrial gene expression	32/578	165/18862	4.85885468712701e-17	9.45776064849272e-14	9.00422492282853e-14	6183	32	MRPS12	GV/MI
GO:0140053	mitochondrial gene expression	32/578	165/18862	4.85885468712701e-17	9.45776064849272e-14	9.00422492282853e-14	57129	32	MRPL47	GV/MI
GO:0140053	mitochondrial gene expression	32/578	165/18862	4.85885468712701e-17	9.45776064849272e-14	9.00422492282853e-14	84769	32	MPV17L2	GV/MI
GO:0140053	mitochondrial gene expression	32/578	165/18862	4.85885468712701e-17	9.45776064849272e-14	9.00422492282853e-14	84311	32	MRPL45	GV/MI
GO:0140053	mitochondrial gene expression	32/578	165/18862	4.85885468712701e-17	9.45776064849272e-14	9.00422492282853e-14	54998	32	AURKAIP1	GV/MI
GO:0070125	mitochondrial translational elongation	23/578	88/18862	1.34934523064404e-15	1.75100032763242e-12	1.66703317792901e-12	64979	23	MRPL36	GV/MI
GO:0070125	mitochondrial translational elongation	23/578	88/18862	1.34934523064404e-15	1.75100032763242e-12	1.66703317792901e-12	51258	23	MRPL51	GV/MI
GO:0070125	mitochondrial translational elongation	23/578	88/18862	1.34934523064404e-15	1.75100032763242e-12	1.66703317792901e-12	26589	23	MRPL46	GV/MI
GO:0070125	mitochondrial translational elongation	23/578	88/18862	1.34934523064404e-15	1.75100032763242e-12	1.66703317792901e-12	55168	23	MRPS18A	GV/MI
GO:0070125	mitochondrial translational elongation	23/578	88/18862	1.34934523064404e-15	1.75100032763242e-12	1.66703317792901e-12	10102	23	TSFM	GV/MI
GO:0070125	mitochondrial translational elongation	23/578	88/18862	1.34934523064404e-15	1.75100032763242e-12	1.66703317792901e-12	64928	23	MRPL14	GV/MI
GO:0070125	mitochondrial translational elongation	23/578	88/18862	1.34934523064404e-15	1.75100032763242e-12	1.66703317792901e-12	3396	23	MRPL58	GV/MI
GO:0070125	mitochondrial translational elongation	23/578	88/18862	1.34934523064404e-15	1.75100032763242e-12	1.66703317792901e-12	64963	23	MRPS11	GV/MI
GO:0070125	mitochondrial translational elongation	23/578	88/18862	1.34934523064404e-15	1.75100032763242e-12	1.66703317792901e-12	64975	23	MRPL41	GV/MI
GO:0070125	mitochondrial translational elongation	23/578	88/18862	1.34934523064404e-15	1.75100032763242e-12	1.66703317792901e-12	65003	23	MRPL11	GV/MI
GO:0070125	mitochondrial translational elongation	23/578	88/18862	1.34934523064404e-15	1.75100032763242e-12	1.66703317792901e-12	29093	23	MRPL22	GV/MI
GO:0070125	mitochondrial translational elongation	23/578	88/18862	1.34934523064404e-15	1.75100032763242e-12	1.66703317792901e-12	51081	23	MRPS7	GV/MI
GO:0070125	mitochondrial translational elongation	23/578	88/18862	1.34934523064404e-15	1.75100032763242e-12	1.66703317792901e-12	51264	23	MRPL27	GV/MI
GO:0070125	mitochondrial translational elongation	23/578	88/18862	1.34934523064404e-15	1.75100032763242e-12	1.66703317792901e-12	55052	23	MRPL20	GV/MI
GO:0070125	mitochondrial translational elongation	23/578	88/18862	1.34934523064404e-15	1.75100032763242e-12	1.66703317792901e-12	29088	23	MRPL15	GV/MI
GO:0070125	mitochondrial translational elongation	23/578	88/18862	1.34934523064404e-15	1.75100032763242e-12	1.66703317792901e-12	116541	23	MRPL54	GV/MI
GO:0070125	mitochondrial translational elongation	23/578	88/18862	1.34934523064404e-15	1.75100032763242e-12	1.66703317792901e-12	64960	23	MRPS15	GV/MI
GO:0070125	mitochondrial translational elongation	23/578	88/18862	1.34934523064404e-15	1.75100032763242e-12	1.66703317792901e-12	7284	23	TUFM	GV/MI
GO:0070125	mitochondrial translational elongation	23/578	88/18862	1.34934523064404e-15	1.75100032763242e-12	1.66703317792901e-12	122704	23	MRPL52	GV/MI
GO:0070125	mitochondrial translational elongation	23/578	88/18862	1.34934523064404e-15	1.75100032763242e-12	1.66703317792901e-12	6183	23	MRPS12	GV/MI
GO:0070125	mitochondrial translational elongation	23/578	88/18862	1.34934523064404e-15	1.75100032763242e-12	1.66703317792901e-12	57129	23	MRPL47	GV/MI
GO:0070125	mitochondrial translational elongation	23/578	88/18862	1.34934523064404e-15	1.75100032763242e-12	1.66703317792901e-12	84311	23	MRPL45	GV/MI
GO:0070125	mitochondrial translational elongation	23/578	88/18862	1.34934523064404e-15	1.75100032763242e-12	1.66703317792901e-12	54998	23	AURKAIP1	GV/MI
GO:0070126	mitochondrial translational termination	21/578	89/18862	2.12908732040422e-13	2.0721342345834e-10	1.97276748819559e-10	64979	21	MRPL36	GV/MI
GO:0070126	mitochondrial translational termination	21/578	89/18862	2.12908732040422e-13	2.0721342345834e-10	1.97276748819559e-10	51258	21	MRPL51	GV/MI
GO:0070126	mitochondrial translational termination	21/578	89/18862	2.12908732040422e-13	2.0721342345834e-10	1.97276748819559e-10	26589	21	MRPL46	GV/MI
GO:0070126	mitochondrial translational termination	21/578	89/18862	2.12908732040422e-13	2.0721342345834e-10	1.97276748819559e-10	55168	21	MRPS18A	GV/MI
GO:0070126	mitochondrial translational termination	21/578	89/18862	2.12908732040422e-13	2.0721342345834e-10	1.97276748819559e-10	64928	21	MRPL14	GV/MI
GO:0070126	mitochondrial translational termination	21/578	89/18862	2.12908732040422e-13	2.0721342345834e-10	1.97276748819559e-10	3396	21	MRPL58	GV/MI
GO:0070126	mitochondrial translational termination	21/578	89/18862	2.12908732040422e-13	2.0721342345834e-10	1.97276748819559e-10	64963	21	MRPS11	GV/MI
GO:0070126	mitochondrial translational termination	21/578	89/18862	2.12908732040422e-13	2.0721342345834e-10	1.97276748819559e-10	64975	21	MRPL41	GV/MI
GO:0070126	mitochondrial translational termination	21/578	89/18862	2.12908732040422e-13	2.0721342345834e-10	1.97276748819559e-10	65003	21	MRPL11	GV/MI
GO:0070126	mitochondrial translational termination	21/578	89/18862	2.12908732040422e-13	2.0721342345834e-10	1.97276748819559e-10	29093	21	MRPL22	GV/MI
GO:0070126	mitochondrial translational termination	21/578	89/18862	2.12908732040422e-13	2.0721342345834e-10	1.97276748819559e-10	51081	21	MRPS7	GV/MI
GO:0070126	mitochondrial translational termination	21/578	89/18862	2.12908732040422e-13	2.0721342345834e-10	1.97276748819559e-10	51264	21	MRPL27	GV/MI
GO:0070126	mitochondrial translational termination	21/578	89/18862	2.12908732040422e-13	2.0721342345834e-10	1.97276748819559e-10	55052	21	MRPL20	GV/MI
GO:0070126	mitochondrial translational termination	21/578	89/18862	2.12908732040422e-13	2.0721342345834e-10	1.97276748819559e-10	29088	21	MRPL15	GV/MI
GO:0070126	mitochondrial translational termination	21/578	89/18862	2.12908732040422e-13	2.0721342345834e-10	1.97276748819559e-10	116541	21	MRPL54	GV/MI
GO:0070126	mitochondrial translational termination	21/578	89/18862	2.12908732040422e-13	2.0721342345834e-10	1.97276748819559e-10	64960	21	MRPS15	GV/MI
GO:0070126	mitochondrial translational termination	21/578	89/18862	2.12908732040422e-13	2.0721342345834e-10	1.97276748819559e-10	122704	21	MRPL52	GV/MI
GO:0070126	mitochondrial translational termination	21/578	89/18862	2.12908732040422e-13	2.0721342345834e-10	1.97276748819559e-10	6183	21	MRPS12	GV/MI
GO:0070126	mitochondrial translational termination	21/578	89/18862	2.12908732040422e-13	2.0721342345834e-10	1.97276748819559e-10	57129	21	MRPL47	GV/MI
GO:0070126	mitochondrial translational termination	21/578	89/18862	2.12908732040422e-13	2.0721342345834e-10	1.97276748819559e-10	84311	21	MRPL45	GV/MI
GO:0070126	mitochondrial translational termination	21/578	89/18862	2.12908732040422e-13	2.0721342345834e-10	1.97276748819559e-10	54998	21	AURKAIP1	GV/MI
GO:0006415	translational termination	21/578	105/18862	6.60523319417764e-12	5.14283456498671e-09	4.89621601614726e-09	64979	21	MRPL36	GV/MI
GO:0006415	translational termination	21/578	105/18862	6.60523319417764e-12	5.14283456498671e-09	4.89621601614726e-09	51258	21	MRPL51	GV/MI
GO:0006415	translational termination	21/578	105/18862	6.60523319417764e-12	5.14283456498671e-09	4.89621601614726e-09	26589	21	MRPL46	GV/MI
GO:0006415	translational termination	21/578	105/18862	6.60523319417764e-12	5.14283456498671e-09	4.89621601614726e-09	55168	21	MRPS18A	GV/MI
GO:0006415	translational termination	21/578	105/18862	6.60523319417764e-12	5.14283456498671e-09	4.89621601614726e-09	64928	21	MRPL14	GV/MI
GO:0006415	translational termination	21/578	105/18862	6.60523319417764e-12	5.14283456498671e-09	4.89621601614726e-09	3396	21	MRPL58	GV/MI
GO:0006415	translational termination	21/578	105/18862	6.60523319417764e-12	5.14283456498671e-09	4.89621601614726e-09	64963	21	MRPS11	GV/MI
GO:0006415	translational termination	21/578	105/18862	6.60523319417764e-12	5.14283456498671e-09	4.89621601614726e-09	64975	21	MRPL41	GV/MI
GO:0006415	translational termination	21/578	105/18862	6.60523319417764e-12	5.14283456498671e-09	4.89621601614726e-09	65003	21	MRPL11	GV/MI
GO:0006415	translational termination	21/578	105/18862	6.60523319417764e-12	5.14283456498671e-09	4.89621601614726e-09	29093	21	MRPL22	GV/MI
GO:0006415	translational termination	21/578	105/18862	6.60523319417764e-12	5.14283456498671e-09	4.89621601614726e-09	51081	21	MRPS7	GV/MI
GO:0006415	translational termination	21/578	105/18862	6.60523319417764e-12	5.14283456498671e-09	4.89621601614726e-09	51264	21	MRPL27	GV/MI
GO:0006415	translational termination	21/578	105/18862	6.60523319417764e-12	5.14283456498671e-09	4.89621601614726e-09	55052	21	MRPL20	GV/MI
GO:0006415	translational termination	21/578	105/18862	6.60523319417764e-12	5.14283456498671e-09	4.89621601614726e-09	29088	21	MRPL15	GV/MI
GO:0006415	translational termination	21/578	105/18862	6.60523319417764e-12	5.14283456498671e-09	4.89621601614726e-09	116541	21	MRPL54	GV/MI
GO:0006415	translational termination	21/578	105/18862	6.60523319417764e-12	5.14283456498671e-09	4.89621601614726e-09	64960	21	MRPS15	GV/MI
GO:0006415	translational termination	21/578	105/18862	6.60523319417764e-12	5.14283456498671e-09	4.89621601614726e-09	122704	21	MRPL52	GV/MI
GO:0006415	translational termination	21/578	105/18862	6.60523319417764e-12	5.14283456498671e-09	4.89621601614726e-09	6183	21	MRPS12	GV/MI
GO:0006415	translational termination	21/578	105/18862	6.60523319417764e-12	5.14283456498671e-09	4.89621601614726e-09	57129	21	MRPL47	GV/MI
GO:0006415	translational termination	21/578	105/18862	6.60523319417764e-12	5.14283456498671e-09	4.89621601614726e-09	84311	21	MRPL45	GV/MI
GO:0006415	translational termination	21/578	105/18862	6.60523319417764e-12	5.14283456498671e-09	4.89621601614726e-09	54998	21	AURKAIP1	GV/MI
GO:0006414	translational elongation	23/578	134/18862	1.81779135956886e-11	1.1794436271336e-08	1.12288480298982e-08	64979	23	MRPL36	GV/MI
GO:0006414	translational elongation	23/578	134/18862	1.81779135956886e-11	1.1794436271336e-08	1.12288480298982e-08	51258	23	MRPL51	GV/MI
GO:0006414	translational elongation	23/578	134/18862	1.81779135956886e-11	1.1794436271336e-08	1.12288480298982e-08	26589	23	MRPL46	GV/MI
GO:0006414	translational elongation	23/578	134/18862	1.81779135956886e-11	1.1794436271336e-08	1.12288480298982e-08	55168	23	MRPS18A	GV/MI
[truncated: 5,145 more rows]
