# Supplementary material for: Single-Cell Transcriptomics Analysis of Human Small Antral Follicles
Source: Int J Mol Sci. 2021 Nov 4;22(21):11955. doi: 10.3390/ijms222111955 (PMC8584910; doi:10.3390/ijms222111955)
Supplement: Supplementary file 1 [file ijms-22-11955-s001.zip › Table S3. GOterms GC GC1GC2.DEGs.xlsx]

## Sheet: md.GC.GOterm
	Description	GeneRatio	BgRatio	pvalue	p.adjust	qvalue	geneID	Count	name	group
GO:0022904	respiratory electron transport chain	1979-10-01	117/18862	5.73840074587132e-11	7.7640562091639e-08	6.26391744575638e-08	144363	10	ETFRF1	GC1
GO:0022904	respiratory electron transport chain	1979-10-01	117/18862	5.73840074587132e-11	7.7640562091639e-08	6.26391744575638e-08	4725	10	NDUFS5	GC1
GO:0022904	respiratory electron transport chain	1979-10-01	117/18862	5.73840074587132e-11	7.7640562091639e-08	6.26391744575638e-08	54205	10	CYCS	GC1
GO:0022904	respiratory electron transport chain	1979-10-01	117/18862	5.73840074587132e-11	7.7640562091639e-08	6.26391744575638e-08	4709	10	NDUFB3	GC1
GO:0022904	respiratory electron transport chain	1979-10-01	117/18862	5.73840074587132e-11	7.7640562091639e-08	6.26391744575638e-08	4707	10	NDUFB1	GC1
GO:0022904	respiratory electron transport chain	1979-10-01	117/18862	5.73840074587132e-11	7.7640562091639e-08	6.26391744575638e-08	1340	10	COX6B1	GC1
GO:0022904	respiratory electron transport chain	1979-10-01	117/18862	5.73840074587132e-11	7.7640562091639e-08	6.26391744575638e-08	4695	10	NDUFA2	GC1
GO:0022904	respiratory electron transport chain	1979-10-01	117/18862	5.73840074587132e-11	7.7640562091639e-08	6.26391744575638e-08	7388	10	UQCRH	GC1
GO:0022904	respiratory electron transport chain	1979-10-01	117/18862	5.73840074587132e-11	7.7640562091639e-08	6.26391744575638e-08	4694	10	NDUFA1	GC1
GO:0022904	respiratory electron transport chain	1979-10-01	117/18862	5.73840074587132e-11	7.7640562091639e-08	6.26391744575638e-08	983	10	CDK1	GC1
GO:0022900	electron transport chain	1979-11-01	178/18862	2.00823750106552e-10	1.17464346507178e-07	9.47683722938836e-08	144363	11	ETFRF1	GC1
GO:0022900	electron transport chain	1979-11-01	178/18862	2.00823750106552e-10	1.17464346507178e-07	9.47683722938836e-08	4725	11	NDUFS5	GC1
GO:0022900	electron transport chain	1979-11-01	178/18862	2.00823750106552e-10	1.17464346507178e-07	9.47683722938836e-08	54205	11	CYCS	GC1
GO:0022900	electron transport chain	1979-11-01	178/18862	2.00823750106552e-10	1.17464346507178e-07	9.47683722938836e-08	4709	11	NDUFB3	GC1
GO:0022900	electron transport chain	1979-11-01	178/18862	2.00823750106552e-10	1.17464346507178e-07	9.47683722938836e-08	4707	11	NDUFB1	GC1
GO:0022900	electron transport chain	1979-11-01	178/18862	2.00823750106552e-10	1.17464346507178e-07	9.47683722938836e-08	1340	11	COX6B1	GC1
GO:0022900	electron transport chain	1979-11-01	178/18862	2.00823750106552e-10	1.17464346507178e-07	9.47683722938836e-08	4695	11	NDUFA2	GC1
GO:0022900	electron transport chain	1979-11-01	178/18862	2.00823750106552e-10	1.17464346507178e-07	9.47683722938836e-08	7388	11	UQCRH	GC1
GO:0022900	electron transport chain	1979-11-01	178/18862	2.00823750106552e-10	1.17464346507178e-07	9.47683722938836e-08	4694	11	NDUFA1	GC1
GO:0022900	electron transport chain	1979-11-01	178/18862	2.00823750106552e-10	1.17464346507178e-07	9.47683722938836e-08	128	11	ADH5	GC1
GO:0022900	electron transport chain	1979-11-01	178/18862	2.00823750106552e-10	1.17464346507178e-07	9.47683722938836e-08	983	11	CDK1	GC1
GO:0042775	mitochondrial ATP synthesis coupled electron transport	1979-09-01	99/18862	3.17077257846928e-10	1.17464346507178e-07	9.47683722938836e-08	4725	9	NDUFS5	GC1
GO:0042775	mitochondrial ATP synthesis coupled electron transport	1979-09-01	99/18862	3.17077257846928e-10	1.17464346507178e-07	9.47683722938836e-08	54205	9	CYCS	GC1
GO:0042775	mitochondrial ATP synthesis coupled electron transport	1979-09-01	99/18862	3.17077257846928e-10	1.17464346507178e-07	9.47683722938836e-08	4709	9	NDUFB3	GC1
GO:0042775	mitochondrial ATP synthesis coupled electron transport	1979-09-01	99/18862	3.17077257846928e-10	1.17464346507178e-07	9.47683722938836e-08	4707	9	NDUFB1	GC1
GO:0042775	mitochondrial ATP synthesis coupled electron transport	1979-09-01	99/18862	3.17077257846928e-10	1.17464346507178e-07	9.47683722938836e-08	1340	9	COX6B1	GC1
GO:0042775	mitochondrial ATP synthesis coupled electron transport	1979-09-01	99/18862	3.17077257846928e-10	1.17464346507178e-07	9.47683722938836e-08	4695	9	NDUFA2	GC1
GO:0042775	mitochondrial ATP synthesis coupled electron transport	1979-09-01	99/18862	3.17077257846928e-10	1.17464346507178e-07	9.47683722938836e-08	7388	9	UQCRH	GC1
GO:0042775	mitochondrial ATP synthesis coupled electron transport	1979-09-01	99/18862	3.17077257846928e-10	1.17464346507178e-07	9.47683722938836e-08	4694	9	NDUFA1	GC1
GO:0042775	mitochondrial ATP synthesis coupled electron transport	1979-09-01	99/18862	3.17077257846928e-10	1.17464346507178e-07	9.47683722938836e-08	983	9	CDK1	GC1
GO:0042773	ATP synthesis coupled electron transport	1979-09-01	100/18862	3.47270795290991e-10	1.17464346507178e-07	9.47683722938836e-08	4725	9	NDUFS5	GC1
GO:0042773	ATP synthesis coupled electron transport	1979-09-01	100/18862	3.47270795290991e-10	1.17464346507178e-07	9.47683722938836e-08	54205	9	CYCS	GC1
GO:0042773	ATP synthesis coupled electron transport	1979-09-01	100/18862	3.47270795290991e-10	1.17464346507178e-07	9.47683722938836e-08	4709	9	NDUFB3	GC1
GO:0042773	ATP synthesis coupled electron transport	1979-09-01	100/18862	3.47270795290991e-10	1.17464346507178e-07	9.47683722938836e-08	4707	9	NDUFB1	GC1
GO:0042773	ATP synthesis coupled electron transport	1979-09-01	100/18862	3.47270795290991e-10	1.17464346507178e-07	9.47683722938836e-08	1340	9	COX6B1	GC1
GO:0042773	ATP synthesis coupled electron transport	1979-09-01	100/18862	3.47270795290991e-10	1.17464346507178e-07	9.47683722938836e-08	4695	9	NDUFA2	GC1
GO:0042773	ATP synthesis coupled electron transport	1979-09-01	100/18862	3.47270795290991e-10	1.17464346507178e-07	9.47683722938836e-08	7388	9	UQCRH	GC1
GO:0042773	ATP synthesis coupled electron transport	1979-09-01	100/18862	3.47270795290991e-10	1.17464346507178e-07	9.47683722938836e-08	4694	9	NDUFA1	GC1
GO:0042773	ATP synthesis coupled electron transport	1979-09-01	100/18862	3.47270795290991e-10	1.17464346507178e-07	9.47683722938836e-08	983	9	CDK1	GC1
GO:0046034	ATP metabolic process	13/79	313/18862	5.58042215715947e-10	1.51006223572735e-07	1.21829426883671e-07	7167	13	TPI1	GC1
GO:0046034	ATP metabolic process	13/79	313/18862	5.58042215715947e-10	1.51006223572735e-07	1.21829426883671e-07	4725	13	NDUFS5	GC1
GO:0046034	ATP metabolic process	13/79	313/18862	5.58042215715947e-10	1.51006223572735e-07	1.21829426883671e-07	54205	13	CYCS	GC1
GO:0046034	ATP metabolic process	13/79	313/18862	5.58042215715947e-10	1.51006223572735e-07	1.21829426883671e-07	2023	13	ENO1	GC1
GO:0046034	ATP metabolic process	13/79	313/18862	5.58042215715947e-10	1.51006223572735e-07	1.21829426883671e-07	4709	13	NDUFB3	GC1
GO:0046034	ATP metabolic process	13/79	313/18862	5.58042215715947e-10	1.51006223572735e-07	1.21829426883671e-07	4707	13	NDUFB1	GC1
GO:0046034	ATP metabolic process	13/79	313/18862	5.58042215715947e-10	1.51006223572735e-07	1.21829426883671e-07	1340	13	COX6B1	GC1
GO:0046034	ATP metabolic process	13/79	313/18862	5.58042215715947e-10	1.51006223572735e-07	1.21829426883671e-07	4695	13	NDUFA2	GC1
GO:0046034	ATP metabolic process	13/79	313/18862	5.58042215715947e-10	1.51006223572735e-07	1.21829426883671e-07	7114	13	TMSB4X	GC1
GO:0046034	ATP metabolic process	13/79	313/18862	5.58042215715947e-10	1.51006223572735e-07	1.21829426883671e-07	7388	13	UQCRH	GC1
GO:0046034	ATP metabolic process	13/79	313/18862	5.58042215715947e-10	1.51006223572735e-07	1.21829426883671e-07	2597	13	GAPDH	GC1
GO:0046034	ATP metabolic process	13/79	313/18862	5.58042215715947e-10	1.51006223572735e-07	1.21829426883671e-07	4694	13	NDUFA1	GC1
GO:0046034	ATP metabolic process	13/79	313/18862	5.58042215715947e-10	1.51006223572735e-07	1.21829426883671e-07	983	13	CDK1	GC1
GO:0045333	cellular respiration	1979-10-01	187/18862	5.74339447776518e-09	1.29513545473605e-06	1.04489474972675e-06	144363	10	ETFRF1	GC1
GO:0045333	cellular respiration	1979-10-01	187/18862	5.74339447776518e-09	1.29513545473605e-06	1.04489474972675e-06	4725	10	NDUFS5	GC1
GO:0045333	cellular respiration	1979-10-01	187/18862	5.74339447776518e-09	1.29513545473605e-06	1.04489474972675e-06	54205	10	CYCS	GC1
GO:0045333	cellular respiration	1979-10-01	187/18862	5.74339447776518e-09	1.29513545473605e-06	1.04489474972675e-06	4709	10	NDUFB3	GC1
GO:0045333	cellular respiration	1979-10-01	187/18862	5.74339447776518e-09	1.29513545473605e-06	1.04489474972675e-06	4707	10	NDUFB1	GC1
GO:0045333	cellular respiration	1979-10-01	187/18862	5.74339447776518e-09	1.29513545473605e-06	1.04489474972675e-06	1340	10	COX6B1	GC1
GO:0045333	cellular respiration	1979-10-01	187/18862	5.74339447776518e-09	1.29513545473605e-06	1.04489474972675e-06	4695	10	NDUFA2	GC1
GO:0045333	cellular respiration	1979-10-01	187/18862	5.74339447776518e-09	1.29513545473605e-06	1.04489474972675e-06	7388	10	UQCRH	GC1
GO:0045333	cellular respiration	1979-10-01	187/18862	5.74339447776518e-09	1.29513545473605e-06	1.04489474972675e-06	4694	10	NDUFA1	GC1
GO:0045333	cellular respiration	1979-10-01	187/18862	5.74339447776518e-09	1.29513545473605e-06	1.04489474972675e-06	983	10	CDK1	GC1
GO:0006119	oxidative phosphorylation	1979-09-01	148/18862	1.13866003991998e-08	2.20086719144534e-06	1.77562475398048e-06	4725	9	NDUFS5	GC1
GO:0006119	oxidative phosphorylation	1979-09-01	148/18862	1.13866003991998e-08	2.20086719144534e-06	1.77562475398048e-06	54205	9	CYCS	GC1
GO:0006119	oxidative phosphorylation	1979-09-01	148/18862	1.13866003991998e-08	2.20086719144534e-06	1.77562475398048e-06	4709	9	NDUFB3	GC1
GO:0006119	oxidative phosphorylation	1979-09-01	148/18862	1.13866003991998e-08	2.20086719144534e-06	1.77562475398048e-06	4707	9	NDUFB1	GC1
GO:0006119	oxidative phosphorylation	1979-09-01	148/18862	1.13866003991998e-08	2.20086719144534e-06	1.77562475398048e-06	1340	9	COX6B1	GC1
GO:0006119	oxidative phosphorylation	1979-09-01	148/18862	1.13866003991998e-08	2.20086719144534e-06	1.77562475398048e-06	4695	9	NDUFA2	GC1
GO:0006119	oxidative phosphorylation	1979-09-01	148/18862	1.13866003991998e-08	2.20086719144534e-06	1.77562475398048e-06	7388	9	UQCRH	GC1
GO:0006119	oxidative phosphorylation	1979-09-01	148/18862	1.13866003991998e-08	2.20086719144534e-06	1.77562475398048e-06	4694	9	NDUFA1	GC1
GO:0006119	oxidative phosphorylation	1979-09-01	148/18862	1.13866003991998e-08	2.20086719144534e-06	1.77562475398048e-06	983	9	CDK1	GC1
GO:0015980	energy derivation by oxidation of organic compounds	1979-10-01	278/18862	2.42180367315027e-07	4.09587546221539e-05	3.30448738033793e-05	144363	10	ETFRF1	GC1
GO:0015980	energy derivation by oxidation of organic compounds	1979-10-01	278/18862	2.42180367315027e-07	4.09587546221539e-05	3.30448738033793e-05	4725	10	NDUFS5	GC1
GO:0015980	energy derivation by oxidation of organic compounds	1979-10-01	278/18862	2.42180367315027e-07	4.09587546221539e-05	3.30448738033793e-05	54205	10	CYCS	GC1
GO:0015980	energy derivation by oxidation of organic compounds	1979-10-01	278/18862	2.42180367315027e-07	4.09587546221539e-05	3.30448738033793e-05	4709	10	NDUFB3	GC1
GO:0015980	energy derivation by oxidation of organic compounds	1979-10-01	278/18862	2.42180367315027e-07	4.09587546221539e-05	3.30448738033793e-05	4707	10	NDUFB1	GC1
GO:0015980	energy derivation by oxidation of organic compounds	1979-10-01	278/18862	2.42180367315027e-07	4.09587546221539e-05	3.30448738033793e-05	1340	10	COX6B1	GC1
GO:0015980	energy derivation by oxidation of organic compounds	1979-10-01	278/18862	2.42180367315027e-07	4.09587546221539e-05	3.30448738033793e-05	4695	10	NDUFA2	GC1
GO:0015980	energy derivation by oxidation of organic compounds	1979-10-01	278/18862	2.42180367315027e-07	4.09587546221539e-05	3.30448738033793e-05	7388	10	UQCRH	GC1
GO:0015980	energy derivation by oxidation of organic compounds	1979-10-01	278/18862	2.42180367315027e-07	4.09587546221539e-05	3.30448738033793e-05	4694	10	NDUFA1	GC1
GO:0015980	energy derivation by oxidation of organic compounds	1979-10-01	278/18862	2.42180367315027e-07	4.09587546221539e-05	3.30448738033793e-05	983	10	CDK1	GC1
GO:0032543	mitochondrial translation	1979-07-01	134/18862	1.4778061246605e-06	0.000222163520740628	0.000179238005996835	54460	7	MRPS21	GC1
GO:0032543	mitochondrial translation	1979-07-01	134/18862	1.4778061246605e-06	0.000222163520740628	0.000179238005996835	54931	7	TRMT10C	GC1
GO:0032543	mitochondrial translation	1979-07-01	134/18862	1.4778061246605e-06	0.000222163520740628	0.000179238005996835	51258	7	MRPL51	GC1
GO:0032543	mitochondrial translation	1979-07-01	134/18862	1.4778061246605e-06	0.000222163520740628	0.000179238005996835	64976	7	MRPL40	GC1
GO:0032543	mitochondrial translation	1979-07-01	134/18862	1.4778061246605e-06	0.000222163520740628	0.000179238005996835	51264	7	MRPL27	GC1
GO:0032543	mitochondrial translation	1979-07-01	134/18862	1.4778061246605e-06	0.000222163520740628	0.000179238005996835	28973	7	MRPS18B	GC1
GO:0032543	mitochondrial translation	1979-07-01	134/18862	1.4778061246605e-06	0.000222163520740628	0.000179238005996835	55052	7	MRPL20	GC1
GO:0070125	mitochondrial translational elongation	1979-06-01	88/18862	1.83581319982912e-06	0.000241326469865217	0.000194698369510429	54460	6	MRPS21	GC1
GO:0070125	mitochondrial translational elongation	1979-06-01	88/18862	1.83581319982912e-06	0.000241326469865217	0.000194698369510429	51258	6	MRPL51	GC1
GO:0070125	mitochondrial translational elongation	1979-06-01	88/18862	1.83581319982912e-06	0.000241326469865217	0.000194698369510429	64976	6	MRPL40	GC1
GO:0070125	mitochondrial translational elongation	1979-06-01	88/18862	1.83581319982912e-06	0.000241326469865217	0.000194698369510429	51264	6	MRPL27	GC1
GO:0070125	mitochondrial translational elongation	1979-06-01	88/18862	1.83581319982912e-06	0.000241326469865217	0.000194698369510429	28973	6	MRPS18B	GC1
GO:0070125	mitochondrial translational elongation	1979-06-01	88/18862	1.83581319982912e-06	0.000241326469865217	0.000194698369510429	55052	6	MRPL20	GC1
GO:0070126	mitochondrial translational termination	1979-06-01	89/18862	1.96200382004242e-06	0.000241326469865217	0.000194698369510429	54460	6	MRPS21	GC1
GO:0070126	mitochondrial translational termination	1979-06-01	89/18862	1.96200382004242e-06	0.000241326469865217	0.000194698369510429	51258	6	MRPL51	GC1
GO:0070126	mitochondrial translational termination	1979-06-01	89/18862	1.96200382004242e-06	0.000241326469865217	0.000194698369510429	64976	6	MRPL40	GC1
GO:0070126	mitochondrial translational termination	1979-06-01	89/18862	1.96200382004242e-06	0.000241326469865217	0.000194698369510429	51264	6	MRPL27	GC1
GO:0070126	mitochondrial translational termination	1979-06-01	89/18862	1.96200382004242e-06	0.000241326469865217	0.000194698369510429	28973	6	MRPS18B	GC1
GO:0070126	mitochondrial translational termination	1979-06-01	89/18862	1.96200382004242e-06	0.000241326469865217	0.000194698369510429	55052	6	MRPL20	GC1
GO:0010948	negative regulation of cell cycle process	1979-10-01	359/18862	2.47129695281332e-06	0.000278638731429702	0.000224801310532229	5693	10	PSMB5	GC1
GO:0010948	negative regulation of cell cycle process	1979-10-01	359/18862	2.47129695281332e-06	0.000278638731429702	0.000224801310532229	5685	10	PSMA4	GC1
GO:0010948	negative regulation of cell cycle process	1979-10-01	359/18862	2.47129695281332e-06	0.000278638731429702	0.000224801310532229	9978	10	RBX1	GC1
GO:0010948	negative regulation of cell cycle process	1979-10-01	359/18862	2.47129695281332e-06	0.000278638731429702	0.000224801310532229	9337	10	CNOT8	GC1
GO:0010948	negative regulation of cell cycle process	1979-10-01	359/18862	2.47129695281332e-06	0.000278638731429702	0.000224801310532229	5695	10	PSMB7	GC1
GO:0010948	negative regulation of cell cycle process	1979-10-01	359/18862	2.47129695281332e-06	0.000278638731429702	0.000224801310532229	6500	10	SKP1	GC1
GO:0010948	negative regulation of cell cycle process	1979-10-01	359/18862	2.47129695281332e-06	0.000278638731429702	0.000224801310532229	983	10	CDK1	GC1
GO:0010948	negative regulation of cell cycle process	1979-10-01	359/18862	2.47129695281332e-06	0.000278638731429702	0.000224801310532229	51065	10	RPS27L	GC1
GO:0010948	negative regulation of cell cycle process	1979-10-01	359/18862	2.47129695281332e-06	0.000278638731429702	0.000224801310532229	9232	10	PTTG1	GC1
GO:0010948	negative regulation of cell cycle process	1979-10-01	359/18862	2.47129695281332e-06	0.000278638731429702	0.000224801310532229	11335	10	CBX3	GC1
GO:0006120	mitochondrial electron transport, NADH to ubiquinone	1979-05-01	55/18862	3.34781592242808e-06	0.000348430380234245	0.000281108106199022	4725	5	NDUFS5	GC1
GO:0006120	mitochondrial electron transport, NADH to ubiquinone	1979-05-01	55/18862	3.34781592242808e-06	0.000348430380234245	0.000281108106199022	4709	5	NDUFB3	GC1
GO:0006120	mitochondrial electron transport, NADH to ubiquinone	1979-05-01	55/18862	3.34781592242808e-06	0.000348430380234245	0.000281108106199022	4707	5	NDUFB1	GC1
GO:0006120	mitochondrial electron transport, NADH to ubiquinone	1979-05-01	55/18862	3.34781592242808e-06	0.000348430380234245	0.000281108106199022	4695	5	NDUFA2	GC1
GO:0006120	mitochondrial electron transport, NADH to ubiquinone	1979-05-01	55/18862	3.34781592242808e-06	0.000348430380234245	0.000281108106199022	4694	5	NDUFA1	GC1
GO:0010972	negative regulation of G2/M transition of mitotic cell cycle	1979-06-01	100/18862	3.88057130055625e-06	0.000360412321952958	0.000290774946796762	5693	6	PSMB5	GC1
GO:0010972	negative regulation of G2/M transition of mitotic cell cycle	1979-06-01	100/18862	3.88057130055625e-06	0.000360412321952958	0.000290774946796762	5685	6	PSMA4	GC1
GO:0010972	negative regulation of G2/M transition of mitotic cell cycle	1979-06-01	100/18862	3.88057130055625e-06	0.000360412321952958	0.000290774946796762	9978	6	RBX1	GC1
GO:0010972	negative regulation of G2/M transition of mitotic cell cycle	1979-06-01	100/18862	3.88057130055625e-06	0.000360412321952958	0.000290774946796762	5695	6	PSMB7	GC1
GO:0010972	negative regulation of G2/M transition of mitotic cell cycle	1979-06-01	100/18862	3.88057130055625e-06	0.000360412321952958	0.000290774946796762	6500	6	SKP1	GC1
GO:0010972	negative regulation of G2/M transition of mitotic cell cycle	1979-06-01	100/18862	3.88057130055625e-06	0.000360412321952958	0.000290774946796762	983	6	CDK1	GC1
GO:0043624	cellular protein complex disassembly	1979-08-01	221/18862	3.99570201721683e-06	0.000360412321952958	0.000290774946796762	54460	8	MRPS21	GC1
GO:0043624	cellular protein complex disassembly	1979-08-01	221/18862	3.99570201721683e-06	0.000360412321952958	0.000290774946796762	5756	8	TWF1	GC1
GO:0043624	cellular protein complex disassembly	1979-08-01	221/18862	3.99570201721683e-06	0.000360412321952958	0.000290774946796762	11034	8	DSTN	GC1
GO:0043624	cellular protein complex disassembly	1979-08-01	221/18862	3.99570201721683e-06	0.000360412321952958	0.000290774946796762	51258	8	MRPL51	GC1
GO:0043624	cellular protein complex disassembly	1979-08-01	221/18862	3.99570201721683e-06	0.000360412321952958	0.000290774946796762	64976	8	MRPL40	GC1
GO:0043624	cellular protein complex disassembly	1979-08-01	221/18862	3.99570201721683e-06	0.000360412321952958	0.000290774946796762	51264	8	MRPL27	GC1
GO:0043624	cellular protein complex disassembly	1979-08-01	221/18862	3.99570201721683e-06	0.000360412321952958	0.000290774946796762	28973	8	MRPS18B	GC1
GO:0043624	cellular protein complex disassembly	1979-08-01	221/18862	3.99570201721683e-06	0.000360412321952958	0.000290774946796762	55052	8	MRPL20	GC1
GO:0006415	translational termination	1979-06-01	105/18862	5.1528714434832e-06	0.000435739691439548	0.000351547874137637	54460	6	MRPS21	GC1
GO:0006415	translational termination	1979-06-01	105/18862	5.1528714434832e-06	0.000435739691439548	0.000351547874137637	51258	6	MRPL51	GC1
GO:0006415	translational termination	1979-06-01	105/18862	5.1528714434832e-06	0.000435739691439548	0.000351547874137637	64976	6	MRPL40	GC1
GO:0006415	translational termination	1979-06-01	105/18862	5.1528714434832e-06	0.000435739691439548	0.000351547874137637	51264	6	MRPL27	GC1
GO:0006415	translational termination	1979-06-01	105/18862	5.1528714434832e-06	0.000435739691439548	0.000351547874137637	28973	6	MRPS18B	GC1
GO:0006415	translational termination	1979-06-01	105/18862	5.1528714434832e-06	0.000435739691439548	0.000351547874137637	55052	6	MRPL20	GC1
GO:0140053	mitochondrial gene expression	1979-07-01	165/18862	5.89446555682737e-06	0.000469130111669849	0.000378486735754179	54460	7	MRPS21	GC1
GO:0140053	mitochondrial gene expression	1979-07-01	165/18862	5.89446555682737e-06	0.000469130111669849	0.000378486735754179	54931	7	TRMT10C	GC1
GO:0140053	mitochondrial gene expression	1979-07-01	165/18862	5.89446555682737e-06	0.000469130111669849	0.000378486735754179	51258	7	MRPL51	GC1
GO:0140053	mitochondrial gene expression	1979-07-01	165/18862	5.89446555682737e-06	0.000469130111669849	0.000378486735754179	64976	7	MRPL40	GC1
GO:0140053	mitochondrial gene expression	1979-07-01	165/18862	5.89446555682737e-06	0.000469130111669849	0.000378486735754179	51264	7	MRPL27	GC1
GO:0140053	mitochondrial gene expression	1979-07-01	165/18862	5.89446555682737e-06	0.000469130111669849	0.000378486735754179	28973	7	MRPS18B	GC1
GO:0140053	mitochondrial gene expression	1979-07-01	165/18862	5.89446555682737e-06	0.000469130111669849	0.000378486735754179	55052	7	MRPL20	GC1
GO:1902750	negative regulation of cell cycle G2/M phase transition	1979-06-01	111/18862	7.10697711749818e-06	0.000520466105381115	0.000419903801517265	5693	6	PSMB5	GC1
GO:1902750	negative regulation of cell cycle G2/M phase transition	1979-06-01	111/18862	7.10697711749818e-06	0.000520466105381115	0.000419903801517265	5685	6	PSMA4	GC1
GO:1902750	negative regulation of cell cycle G2/M phase transition	1979-06-01	111/18862	7.10697711749818e-06	0.000520466105381115	0.000419903801517265	9978	6	RBX1	GC1
GO:1902750	negative regulation of cell cycle G2/M phase transition	1979-06-01	111/18862	7.10697711749818e-06	0.000520466105381115	0.000419903801517265	5695	6	PSMB7	GC1
GO:1902750	negative regulation of cell cycle G2/M phase transition	1979-06-01	111/18862	7.10697711749818e-06	0.000520466105381115	0.000419903801517265	6500	6	SKP1	GC1
GO:1902750	negative regulation of cell cycle G2/M phase transition	1979-06-01	111/18862	7.10697711749818e-06	0.000520466105381115	0.000419903801517265	983	6	CDK1	GC1
GO:0010257	NADH dehydrogenase complex assembly	1979-05-01	65/18862	7.69351227466542e-06	0.000520466105381115	0.000419903801517265	4725	5	NDUFS5	GC1
GO:0010257	NADH dehydrogenase complex assembly	1979-05-01	65/18862	7.69351227466542e-06	0.000520466105381115	0.000419903801517265	4709	5	NDUFB3	GC1
GO:0010257	NADH dehydrogenase complex assembly	1979-05-01	65/18862	7.69351227466542e-06	0.000520466105381115	0.000419903801517265	4707	5	NDUFB1	GC1
GO:0010257	NADH dehydrogenase complex assembly	1979-05-01	65/18862	7.69351227466542e-06	0.000520466105381115	0.000419903801517265	4695	5	NDUFA2	GC1
GO:0010257	NADH dehydrogenase complex assembly	1979-05-01	65/18862	7.69351227466542e-06	0.000520466105381115	0.000419903801517265	4694	5	NDUFA1	GC1
GO:0032981	mitochondrial respiratory chain complex I assembly	1979-05-01	65/18862	7.69351227466542e-06	0.000520466105381115	0.000419903801517265	4725	5	NDUFS5	GC1
GO:0032981	mitochondrial respiratory chain complex I assembly	1979-05-01	65/18862	7.69351227466542e-06	0.000520466105381115	0.000419903801517265	4709	5	NDUFB3	GC1
GO:0032981	mitochondrial respiratory chain complex I assembly	1979-05-01	65/18862	7.69351227466542e-06	0.000520466105381115	0.000419903801517265	4707	5	NDUFB1	GC1
GO:0032981	mitochondrial respiratory chain complex I assembly	1979-05-01	65/18862	7.69351227466542e-06	0.000520466105381115	0.000419903801517265	4695	5	NDUFA2	GC1
GO:0032981	mitochondrial respiratory chain complex I assembly	1979-05-01	65/18862	7.69351227466542e-06	0.000520466105381115	0.000419903801517265	4694	5	NDUFA1	GC1
GO:1901991	negative regulation of mitotic cell cycle phase transition	1979-08-01	250/18862	9.86839138952237e-06	0.000635806359524941	0.000512958489771163	5693	8	PSMB5	GC1
GO:1901991	negative regulation of mitotic cell cycle phase transition	1979-08-01	250/18862	9.86839138952237e-06	0.000635806359524941	0.000512958489771163	5685	8	PSMA4	GC1
GO:1901991	negative regulation of mitotic cell cycle phase transition	1979-08-01	250/18862	9.86839138952237e-06	0.000635806359524941	0.000512958489771163	9978	8	RBX1	GC1
GO:1901991	negative regulation of mitotic cell cycle phase transition	1979-08-01	250/18862	9.86839138952237e-06	0.000635806359524941	0.000512958489771163	9337	8	CNOT8	GC1
GO:1901991	negative regulation of mitotic cell cycle phase transition	1979-08-01	250/18862	9.86839138952237e-06	0.000635806359524941	0.000512958489771163	5695	8	PSMB7	GC1
GO:1901991	negative regulation of mitotic cell cycle phase transition	1979-08-01	250/18862	9.86839138952237e-06	0.000635806359524941	0.000512958489771163	6500	8	SKP1	GC1
GO:1901991	negative regulation of mitotic cell cycle phase transition	1979-08-01	250/18862	9.86839138952237e-06	0.000635806359524941	0.000512958489771163	983	8	CDK1	GC1
GO:1901991	negative regulation of mitotic cell cycle phase transition	1979-08-01	250/18862	9.86839138952237e-06	0.000635806359524941	0.000512958489771163	51065	8	RPS27L	GC1
GO:0043161	proteasome-mediated ubiquitin-dependent protein catabolic process	1979-10-01	425/18862	1.09218275505147e-05	0.000671692394356656	0.000541910773678649	5693	10	PSMB5	GC1
GO:0043161	proteasome-mediated ubiquitin-dependent protein catabolic process	1979-10-01	425/18862	1.09218275505147e-05	0.000671692394356656	0.000541910773678649	5685	10	PSMA4	GC1
GO:0043161	proteasome-mediated ubiquitin-dependent protein catabolic process	1979-10-01	425/18862	1.09218275505147e-05	0.000671692394356656	0.000541910773678649	9604	10	RNF14	GC1
GO:0043161	proteasome-mediated ubiquitin-dependent protein catabolic process	1979-10-01	425/18862	1.09218275505147e-05	0.000671692394356656	0.000541910773678649	6880	10	TAF9	GC1
GO:0043161	proteasome-mediated ubiquitin-dependent protein catabolic process	1979-10-01	425/18862	1.09218275505147e-05	0.000671692394356656	0.000541910773678649	9978	10	RBX1	GC1
GO:0043161	proteasome-mediated ubiquitin-dependent protein catabolic process	1979-10-01	425/18862	1.09218275505147e-05	0.000671692394356656	0.000541910773678649	3429	10	IFI27	GC1
GO:0043161	proteasome-mediated ubiquitin-dependent protein catabolic process	1979-10-01	425/18862	1.09218275505147e-05	0.000671692394356656	0.000541910773678649	5695	10	PSMB7	GC1
GO:0043161	proteasome-mediated ubiquitin-dependent protein catabolic process	1979-10-01	425/18862	1.09218275505147e-05	0.000671692394356656	0.000541910773678649	6500	10	SKP1	GC1
GO:0043161	proteasome-mediated ubiquitin-dependent protein catabolic process	1979-10-01	425/18862	1.09218275505147e-05	0.000671692394356656	0.000541910773678649	983	10	CDK1	GC1
GO:0043161	proteasome-mediated ubiquitin-dependent protein catabolic process	1979-10-01	425/18862	1.09218275505147e-05	0.000671692394356656	0.000541910773678649	9232	10	PTTG1	GC1
GO:0000209	protein polyubiquitination	1979-09-01	337/18862	1.14328408300912e-05	0.00067254928883102	0.000542602102553987	5693	9	PSMB5	GC1
GO:0000209	protein polyubiquitination	1979-09-01	337/18862	1.14328408300912e-05	0.00067254928883102	0.000542602102553987	5685	9	PSMA4	GC1
GO:0000209	protein polyubiquitination	1979-09-01	337/18862	1.14328408300912e-05	0.00067254928883102	0.000542602102553987	9604	9	RNF14	GC1
GO:0000209	protein polyubiquitination	1979-09-01	337/18862	1.14328408300912e-05	0.00067254928883102	0.000542602102553987	9978	9	RBX1	GC1
GO:0000209	protein polyubiquitination	1979-09-01	337/18862	1.14328408300912e-05	0.00067254928883102	0.000542602102553987	29089	9	UBE2T	GC1
GO:0000209	protein polyubiquitination	1979-09-01	337/18862	1.14328408300912e-05	0.00067254928883102	0.000542602102553987	3429	9	IFI27	GC1
GO:0000209	protein polyubiquitination	1979-09-01	337/18862	1.14328408300912e-05	0.00067254928883102	0.000542602102553987	5695	9	PSMB7	GC1
GO:0000209	protein polyubiquitination	1979-09-01	337/18862	1.14328408300912e-05	0.00067254928883102	0.000542602102553987	6500	9	SKP1	GC1
GO:0000209	protein polyubiquitination	1979-09-01	337/18862	1.14328408300912e-05	0.00067254928883102	0.000542602102553987	80829	9	ZFP91	GC1
GO:0038061	NIK/NF-kappaB signaling	1979-07-01	185/18862	1.24555573929e-05	0.000702182048024739	0.000566509342826198	5693	7	PSMB5	GC1
GO:0038061	NIK/NF-kappaB signaling	1979-07-01	185/18862	1.24555573929e-05	0.000702182048024739	0.000566509342826198	5685	7	PSMA4	GC1
GO:0038061	NIK/NF-kappaB signaling	1979-07-01	185/18862	1.24555573929e-05	0.000702182048024739	0.000566509342826198	7105	7	TSPAN6	GC1
GO:0038061	NIK/NF-kappaB signaling	1979-07-01	185/18862	1.24555573929e-05	0.000702182048024739	0.000566509342826198	7114	7	TMSB4X	GC1
GO:0038061	NIK/NF-kappaB signaling	1979-07-01	185/18862	1.24555573929e-05	0.000702182048024739	0.000566509342826198	5695	7	PSMB7	GC1
GO:0038061	NIK/NF-kappaB signaling	1979-07-01	185/18862	1.24555573929e-05	0.000702182048024739	0.000566509342826198	6500	7	SKP1	GC1
GO:0038061	NIK/NF-kappaB signaling	1979-07-01	185/18862	1.24555573929e-05	0.000702182048024739	0.000566509342826198	80829	7	ZFP91	GC1
GO:1901988	negative regulation of cell cycle phase transition	1979-08-01	268/18862	1.63272369128521e-05	0.000883630061723558	0.000712898723310639	5693	8	PSMB5	GC1
GO:1901988	negative regulation of cell cycle phase transition	1979-08-01	268/18862	1.63272369128521e-05	0.000883630061723558	0.000712898723310639	5685	8	PSMA4	GC1
GO:1901988	negative regulation of cell cycle phase transition	1979-08-01	268/18862	1.63272369128521e-05	0.000883630061723558	0.000712898723310639	9978	8	RBX1	GC1
GO:1901988	negative regulation of cell cycle phase transition	1979-08-01	268/18862	1.63272369128521e-05	0.000883630061723558	0.000712898723310639	9337	8	CNOT8	GC1
GO:1901988	negative regulation of cell cycle phase transition	1979-08-01	268/18862	1.63272369128521e-05	0.000883630061723558	0.000712898723310639	5695	8	PSMB7	GC1
GO:1901988	negative regulation of cell cycle phase transition	1979-08-01	268/18862	1.63272369128521e-05	0.000883630061723558	0.000712898723310639	6500	8	SKP1	GC1
GO:1901988	negative regulation of cell cycle phase transition	1979-08-01	268/18862	1.63272369128521e-05	0.000883630061723558	0.000712898723310639	983	8	CDK1	GC1
GO:1901988	negative regulation of cell cycle phase transition	1979-08-01	268/18862	1.63272369128521e-05	0.000883630061723558	0.000712898723310639	51065	8	RPS27L	GC1
GO:0006414	translational elongation	1979-06-01	134/18862	2.08767954887852e-05	0.00108639631908948	0.000876487324772077	54460	6	MRPS21	GC1
GO:0006414	translational elongation	1979-06-01	134/18862	2.08767954887852e-05	0.00108639631908948	0.000876487324772077	51258	6	MRPL51	GC1
GO:0006414	translational elongation	1979-06-01	134/18862	2.08767954887852e-05	0.00108639631908948	0.000876487324772077	64976	6	MRPL40	GC1
GO:0006414	translational elongation	1979-06-01	134/18862	2.08767954887852e-05	0.00108639631908948	0.000876487324772077	51264	6	MRPL27	GC1
GO:0006414	translational elongation	1979-06-01	134/18862	2.08767954887852e-05	0.00108639631908948	0.000876487324772077	28973	6	MRPS18B	GC1
GO:0006414	translational elongation	1979-06-01	134/18862	2.08767954887852e-05	0.00108639631908948	0.000876487324772077	55052	6	MRPL20	GC1
GO:0031145	anaphase-promoting complex-dependent catabolic process	1979-05-01	83/18862	2.55003869425866e-05	0.00127785272345629	0.00103095131615838	5693	5	PSMB5	GC1
GO:0031145	anaphase-promoting complex-dependent catabolic process	1979-05-01	83/18862	2.55003869425866e-05	0.00127785272345629	0.00103095131615838	5685	5	PSMA4	GC1
GO:0031145	anaphase-promoting complex-dependent catabolic process	1979-05-01	83/18862	2.55003869425866e-05	0.00127785272345629	0.00103095131615838	5695	5	PSMB7	GC1
GO:0031145	anaphase-promoting complex-dependent catabolic process	1979-05-01	83/18862	2.55003869425866e-05	0.00127785272345629	0.00103095131615838	983	5	CDK1	GC1
GO:0031145	anaphase-promoting complex-dependent catabolic process	1979-05-01	83/18862	2.55003869425866e-05	0.00127785272345629	0.00103095131615838	9232	5	PTTG1	GC1
GO:0010498	proteasomal protein catabolic process	1979-10-01	483/18862	3.2726425690725e-05	0.00158138764141253	0.00127583847523616	5693	10	PSMB5	GC1
GO:0010498	proteasomal protein catabolic process	1979-10-01	483/18862	3.2726425690725e-05	0.00158138764141253	0.00127583847523616	5685	10	PSMA4	GC1
GO:0010498	proteasomal protein catabolic process	1979-10-01	483/18862	3.2726425690725e-05	0.00158138764141253	0.00127583847523616	9604	10	RNF14	GC1
GO:0010498	proteasomal protein catabolic process	1979-10-01	483/18862	3.2726425690725e-05	0.00158138764141253	0.00127583847523616	6880	10	TAF9	GC1
GO:0010498	proteasomal protein catabolic process	1979-10-01	483/18862	3.2726425690725e-05	0.00158138764141253	0.00127583847523616	9978	10	RBX1	GC1
GO:0010498	proteasomal protein catabolic process	1979-10-01	483/18862	3.2726425690725e-05	0.00158138764141253	0.00127583847523616	3429	10	IFI27	GC1
GO:0010498	proteasomal protein catabolic process	1979-10-01	483/18862	3.2726425690725e-05	0.00158138764141253	0.00127583847523616	5695	10	PSMB7	GC1
GO:0010498	proteasomal protein catabolic process	1979-10-01	483/18862	3.2726425690725e-05	0.00158138764141253	0.00127583847523616	6500	10	SKP1	GC1
GO:0010498	proteasomal protein catabolic process	1979-10-01	483/18862	3.2726425690725e-05	0.00158138764141253	0.00127583847523616	983	10	CDK1	GC1
GO:0010498	proteasomal protein catabolic process	1979-10-01	483/18862	3.2726425690725e-05	0.00158138764141253	0.00127583847523616	9232	10	PTTG1	GC1
GO:0031146	SCF-dependent proteasomal ubiquitin-dependent protein catabolic process	1979-05-01	93/18862	4.41806828657671e-05	0.00206125737646148	0.00166298976884938	5693	5	PSMB5	GC1
GO:0031146	SCF-dependent proteasomal ubiquitin-dependent protein catabolic process	1979-05-01	93/18862	4.41806828657671e-05	0.00206125737646148	0.00166298976884938	5685	5	PSMA4	GC1
GO:0031146	SCF-dependent proteasomal ubiquitin-dependent protein catabolic process	1979-05-01	93/18862	4.41806828657671e-05	0.00206125737646148	0.00166298976884938	9978	5	RBX1	GC1
GO:0031146	SCF-dependent proteasomal ubiquitin-dependent protein catabolic process	1979-05-01	93/18862	4.41806828657671e-05	0.00206125737646148	0.00166298976884938	5695	5	PSMB7	GC1
GO:0031146	SCF-dependent proteasomal ubiquitin-dependent protein catabolic process	1979-05-01	93/18862	4.41806828657671e-05	0.00206125737646148	0.00166298976884938	6500	5	SKP1	GC1
GO:0045930	negative regulation of mitotic cell cycle	1979-08-01	321/18862	5.89239767870913e-05	0.00265747135309782	0.00214400575186715	5693	8	PSMB5	GC1
GO:0045930	negative regulation of mitotic cell cycle	1979-08-01	321/18862	5.89239767870913e-05	0.00265747135309782	0.00214400575186715	5685	8	PSMA4	GC1
GO:0045930	negative regulation of mitotic cell cycle	1979-08-01	321/18862	5.89239767870913e-05	0.00265747135309782	0.00214400575186715	9978	8	RBX1	GC1
GO:0045930	negative regulation of mitotic cell cycle	1979-08-01	321/18862	5.89239767870913e-05	0.00265747135309782	0.00214400575186715	9337	8	CNOT8	GC1
GO:0045930	negative regulation of mitotic cell cycle	1979-08-01	321/18862	5.89239767870913e-05	0.00265747135309782	0.00214400575186715	5695	8	PSMB7	GC1
GO:0045930	negative regulation of mitotic cell cycle	1979-08-01	321/18862	5.89239767870913e-05	0.00265747135309782	0.00214400575186715	6500	8	SKP1	GC1
GO:0045930	negative regulation of mitotic cell cycle	1979-08-01	321/18862	5.89239767870913e-05	0.00265747135309782	0.00214400575186715	983	8	CDK1	GC1
GO:0045930	negative regulation of mitotic cell cycle	1979-08-01	321/18862	5.89239767870913e-05	0.00265747135309782	0.00214400575186715	51065	8	RPS27L	GC1
GO:0033108	mitochondrial respiratory chain complex assembly	1979-05-01	101/18862	6.56018087750274e-05	0.00286320152492297	0.00230998559251964	4725	5	NDUFS5	GC1
GO:0033108	mitochondrial respiratory chain complex assembly	1979-05-01	101/18862	6.56018087750274e-05	0.00286320152492297	0.00230998559251964	4709	5	NDUFB3	GC1
GO:0033108	mitochondrial respiratory chain complex assembly	1979-05-01	101/18862	6.56018087750274e-05	0.00286320152492297	0.00230998559251964	4707	5	NDUFB1	GC1
GO:0033108	mitochondrial respiratory chain complex assembly	1979-05-01	101/18862	6.56018087750274e-05	0.00286320152492297	0.00230998559251964	4695	5	NDUFA2	GC1
GO:0033108	mitochondrial respiratory chain complex assembly	1979-05-01	101/18862	6.56018087750274e-05	0.00286320152492297	0.00230998559251964	4694	5	NDUFA1	GC1
GO:0032984	protein-containing complex disassembly	1979-08-01	328/18862	6.85279974896429e-05	0.00289744939385896	0.00233761623015657	54460	8	MRPS21	GC1
GO:0032984	protein-containing complex disassembly	1979-08-01	328/18862	6.85279974896429e-05	0.00289744939385896	0.00233761623015657	5756	8	TWF1	GC1
GO:0032984	protein-containing complex disassembly	1979-08-01	328/18862	6.85279974896429e-05	0.00289744939385896	0.00233761623015657	11034	8	DSTN	GC1
GO:0032984	protein-containing complex disassembly	1979-08-01	328/18862	6.85279974896429e-05	0.00289744939385896	0.00233761623015657	51258	8	MRPL51	GC1
GO:0032984	protein-containing complex disassembly	1979-08-01	328/18862	6.85279974896429e-05	0.00289744939385896	0.00233761623015657	64976	8	MRPL40	GC1
GO:0032984	protein-containing complex disassembly	1979-08-01	328/18862	6.85279974896429e-05	0.00289744939385896	0.00233761623015657	51264	8	MRPL27	GC1
GO:0032984	protein-containing complex disassembly	1979-08-01	328/18862	6.85279974896429e-05	0.00289744939385896	0.00233761623015657	28973	8	MRPS18B	GC1
GO:0032984	protein-containing complex disassembly	1979-08-01	328/18862	6.85279974896429e-05	0.00289744939385896	0.00233761623015657	55052	8	MRPL20	GC1
GO:0070498	interleukin-1-mediated signaling pathway	1979-05-01	103/18862	7.20318588508179e-05	0.00295330621288354	0.00238268062610202	5693	5	PSMB5	GC1
GO:0070498	interleukin-1-mediated signaling pathway	1979-05-01	103/18862	7.20318588508179e-05	0.00295330621288354	0.00238268062610202	5685	5	PSMA4	GC1
GO:0070498	interleukin-1-mediated signaling pathway	1979-05-01	103/18862	7.20318588508179e-05	0.00295330621288354	0.00238268062610202	9978	5	RBX1	GC1
GO:0070498	interleukin-1-mediated signaling pathway	1979-05-01	103/18862	7.20318588508179e-05	0.00295330621288354	0.00238268062610202	5695	5	PSMB7	GC1
GO:0070498	interleukin-1-mediated signaling pathway	1979-05-01	103/18862	7.20318588508179e-05	0.00295330621288354	0.00238268062610202	6500	5	SKP1	GC1
GO:0010499	proteasomal ubiquitin-independent protein catabolic process	1979-03-01	22/18862	0.000102824723235817	0.00409181913347238	0.00330121479862361	5693	3	PSMB5	GC1
GO:0010499	proteasomal ubiquitin-independent protein catabolic process	1979-03-01	22/18862	0.000102824723235817	0.00409181913347238	0.00330121479862361	5685	3	PSMA4	GC1
GO:0010499	proteasomal ubiquitin-independent protein catabolic process	1979-03-01	22/18862	0.000102824723235817	0.00409181913347238	0.00330121479862361	5695	3	PSMB7	GC1
GO:0070936	protein K48-linked ubiquitination	1979-04-01	61/18862	0.000124072969377433	0.00479630650193334	0.0038695840374255	9978	4	RBX1	GC1
GO:0070936	protein K48-linked ubiquitination	1979-04-01	61/18862	0.000124072969377433	0.00479630650193334	0.0038695840374255	29089	4	UBE2T	GC1
GO:0070936	protein K48-linked ubiquitination	1979-04-01	61/18862	0.000124072969377433	0.00479630650193334	0.0038695840374255	3429	4	IFI27	GC1
GO:0070936	protein K48-linked ubiquitination	1979-04-01	61/18862	0.000124072969377433	0.00479630650193334	0.0038695840374255	6500	4	SKP1	GC1
GO:0006735	NADH regeneration	1979-03-01	27/18862	0.000192376475052762	0.00684961501964177	0.00552616079306688	7167	3	TPI1	GC1
GO:0006735	NADH regeneration	1979-03-01	27/18862	0.000192376475052762	0.00684961501964177	0.00552616079306688	2023	3	ENO1	GC1
GO:0006735	NADH regeneration	1979-03-01	27/18862	0.000192376475052762	0.00684961501964177	0.00552616079306688	2597	3	GAPDH	GC1
GO:0061621	canonical glycolysis	1979-03-01	27/18862	0.000192376475052762	0.00684961501964177	0.00552616079306688	7167	3	TPI1	GC1
GO:0061621	canonical glycolysis	1979-03-01	27/18862	0.000192376475052762	0.00684961501964177	0.00552616079306688	2023	3	ENO1	GC1
GO:0061621	canonical glycolysis	1979-03-01	27/18862	0.000192376475052762	0.00684961501964177	0.00552616079306688	2597	3	GAPDH	GC1
GO:0061718	glucose catabolic process to pyruvate	1979-03-01	27/18862	0.000192376475052762	0.00684961501964177	0.00552616079306688	7167	3	TPI1	GC1
GO:0061718	glucose catabolic process to pyruvate	1979-03-01	27/18862	0.000192376475052762	0.00684961501964177	0.00552616079306688	2023	3	ENO1	GC1
GO:0061718	glucose catabolic process to pyruvate	1979-03-01	27/18862	0.000192376475052762	0.00684961501964177	0.00552616079306688	2597	3	GAPDH	GC1
GO:0010389	regulation of G2/M transition of mitotic cell cycle	1979-06-01	203/18862	0.00020881620040607	0.00724431587562598	0.00584459918545465	5693	6	PSMB5	GC1
GO:0010389	regulation of G2/M transition of mitotic cell cycle	1979-06-01	203/18862	0.00020881620040607	0.00724431587562598	0.00584459918545465	5685	6	PSMA4	GC1
GO:0010389	regulation of G2/M transition of mitotic cell cycle	1979-06-01	203/18862	0.00020881620040607	0.00724431587562598	0.00584459918545465	9978	6	RBX1	GC1
GO:0010389	regulation of G2/M transition of mitotic cell cycle	1979-06-01	203/18862	0.00020881620040607	0.00724431587562598	0.00584459918545465	5695	6	PSMB7	GC1
GO:0010389	regulation of G2/M transition of mitotic cell cycle	1979-06-01	203/18862	0.00020881620040607	0.00724431587562598	0.00584459918545465	6500	6	SKP1	GC1
GO:0010389	regulation of G2/M transition of mitotic cell cycle	1979-06-01	203/18862	0.00020881620040607	0.00724431587562598	0.00584459918545465	983	6	CDK1	GC1
GO:0061620	glycolytic process through glucose-6-phosphate	1979-03-01	28/18862	0.000214812962342176	0.00726604845122412	0.00586213268286413	7167	3	TPI1	GC1
GO:0061620	glycolytic process through glucose-6-phosphate	1979-03-01	28/18862	0.000214812962342176	0.00726604845122412	0.00586213268286413	2023	3	ENO1	GC1
GO:0061620	glycolytic process through glucose-6-phosphate	1979-03-01	28/18862	0.000214812962342176	0.00726604845122412	0.00586213268286413	2597	3	GAPDH	GC1
GO:0070555	response to interleukin-1	1979-06-01	206/18862	0.000226027475211798	0.00745890668198933	0.00601772764556186	5693	6	PSMB5	GC1
GO:0070555	response to interleukin-1	1979-06-01	206/18862	0.000226027475211798	0.00745890668198933	0.00601772764556186	5685	6	PSMA4	GC1
GO:0070555	response to interleukin-1	1979-06-01	206/18862	0.000226027475211798	0.00745890668198933	0.00601772764556186	6880	6	TAF9	GC1
GO:0070555	response to interleukin-1	1979-06-01	206/18862	0.000226027475211798	0.00745890668198933	0.00601772764556186	9978	6	RBX1	GC1
GO:0070555	response to interleukin-1	1979-06-01	206/18862	0.000226027475211798	0.00745890668198933	0.00601772764556186	5695	6	PSMB7	GC1
GO:0070555	response to interleukin-1	1979-06-01	206/18862	0.000226027475211798	0.00745890668198933	0.00601772764556186	6500	6	SKP1	GC1
GO:0061615	glycolytic process through fructose-6-phosphate	1979-03-01	29/18862	0.000238877831931739	0.00769527872865816	0.00620842886499282	7167	3	TPI1	GC1
GO:0061615	glycolytic process through fructose-6-phosphate	1979-03-01	29/18862	0.000238877831931739	0.00769527872865816	0.00620842886499282	2023	3	ENO1	GC1
GO:0061615	glycolytic process through fructose-6-phosphate	1979-03-01	29/18862	0.000238877831931739	0.00769527872865816	0.00620842886499282	2597	3	GAPDH	GC1
GO:0061013	regulation of mRNA catabolic process	1979-06-01	210/18862	0.000250695371989053	0.0078881590302602	0.00636404163409174	5693	6	PSMB5	GC1
GO:0061013	regulation of mRNA catabolic process	1979-06-01	210/18862	0.000250695371989053	0.0078881590302602	0.00636404163409174	3183	6	HNRNPC	GC1
GO:0061013	regulation of mRNA catabolic process	1979-06-01	210/18862	0.000250695371989053	0.0078881590302602	0.00636404163409174	5685	6	PSMA4	GC1
GO:0061013	regulation of mRNA catabolic process	1979-06-01	210/18862	0.000250695371989053	0.0078881590302602	0.00636404163409174	9337	6	CNOT8	GC1
GO:0061013	regulation of mRNA catabolic process	1979-06-01	210/18862	0.000250695371989053	0.0078881590302602	0.00636404163409174	5695	6	PSMB7	GC1
GO:0061013	regulation of mRNA catabolic process	1979-06-01	210/18862	0.000250695371989053	0.0078881590302602	0.00636404163409174	10247	6	RIDA	GC1
GO:0061418	regulation of transcription from RNA polymerase II promoter in response to hypoxia	1979-04-01	77/18862	0.000305845513461736	0.00940474953894838	0.00758760281004355	5693	4	PSMB5	GC1
GO:0061418	regulation of transcription from RNA polymerase II promoter in response to hypoxia	1979-04-01	77/18862	0.000305845513461736	0.00940474953894838	0.00758760281004355	5685	4	PSMA4	GC1
GO:0061418	regulation of transcription from RNA polymerase II promoter in response to hypoxia	1979-04-01	77/18862	0.000305845513461736	0.00940474953894838	0.00758760281004355	9978	4	RBX1	GC1
GO:0061418	regulation of transcription from RNA polymerase II promoter in response to hypoxia	1979-04-01	77/18862	0.000305845513461736	0.00940474953894838	0.00758760281004355	5695	4	PSMB7	GC1
GO:1902749	regulation of cell cycle G2/M phase transition	1979-06-01	219/18862	0.000313963430419263	0.00943983380793917	0.00761590824198306	5693	6	PSMB5	GC1
GO:1902749	regulation of cell cycle G2/M phase transition	1979-06-01	219/18862	0.000313963430419263	0.00943983380793917	0.00761590824198306	5685	6	PSMA4	GC1
GO:1902749	regulation of cell cycle G2/M phase transition	1979-06-01	219/18862	0.000313963430419263	0.00943983380793917	0.00761590824198306	9978	6	RBX1	GC1
GO:1902749	regulation of cell cycle G2/M phase transition	1979-06-01	219/18862	0.000313963430419263	0.00943983380793917	0.00761590824198306	5695	6	PSMB7	GC1
GO:1902749	regulation of cell cycle G2/M phase transition	1979-06-01	219/18862	0.000313963430419263	0.00943983380793917	0.00761590824198306	6500	6	SKP1	GC1
GO:1902749	regulation of cell cycle G2/M phase transition	1979-06-01	219/18862	0.000313963430419263	0.00943983380793917	0.00761590824198306	983	6	CDK1	GC1
GO:0052548	regulation of endopeptidase activity	1979-08-01	426/18862	0.000407479964547733	0.0119852259137627	0.00966949023423338	684	8	BST2	GC1
GO:0052548	regulation of endopeptidase activity	1979-08-01	426/18862	0.000407479964547733	0.0119852259137627	0.00966949023423338	54205	8	CYCS	GC1
GO:0052548	regulation of endopeptidase activity	1979-08-01	426/18862	0.000407479964547733	0.0119852259137627	0.00966949023423338	10972	8	TMED10	GC1
GO:0052548	regulation of endopeptidase activity	1979-08-01	426/18862	0.000407479964547733	0.0119852259137627	0.00966949023423338	302	8	ANXA2	GC1
GO:0052548	regulation of endopeptidase activity	1979-08-01	426/18862	0.000407479964547733	0.0119852259137627	0.00966949023423338	2597	8	GAPDH	GC1
GO:0052548	regulation of endopeptidase activity	1979-08-01	426/18862	0.000407479964547733	0.0119852259137627	0.00966949023423338	10935	8	PRDX3	GC1
GO:0052548	regulation of endopeptidase activity	1979-08-01	426/18862	0.000407479964547733	0.0119852259137627	0.00966949023423338	51065	8	RPS27L	GC1
GO:0052548	regulation of endopeptidase activity	1979-08-01	426/18862	0.000407479964547733	0.0119852259137627	0.00966949023423338	9232	8	PTTG1	GC1
GO:0006007	glucose catabolic process	1979-03-01	36/18862	0.000457031972334727	0.0131566863525295	0.0106146059420182	7167	3	TPI1	GC1
GO:0006007	glucose catabolic process	1979-03-01	36/18862	0.000457031972334727	0.0131566863525295	0.0106146059420182	2023	3	ENO1	GC1
GO:0006007	glucose catabolic process	1979-03-01	36/18862	0.000457031972334727	0.0131566863525295	0.0106146059420182	2597	3	GAPDH	GC1
GO:1901990	regulation of mitotic cell cycle phase transition	1979-08-01	439/18862	0.000497141664943229	0.0135138323874629	0.0109027457002366	5693	8	PSMB5	GC1
GO:1901990	regulation of mitotic cell cycle phase transition	1979-08-01	439/18862	0.000497141664943229	0.0135138323874629	0.0109027457002366	5685	8	PSMA4	GC1
GO:1901990	regulation of mitotic cell cycle phase transition	1979-08-01	439/18862	0.000497141664943229	0.0135138323874629	0.0109027457002366	9978	8	RBX1	GC1
GO:1901990	regulation of mitotic cell cycle phase transition	1979-08-01	439/18862	0.000497141664943229	0.0135138323874629	0.0109027457002366	9337	8	CNOT8	GC1
GO:1901990	regulation of mitotic cell cycle phase transition	1979-08-01	439/18862	0.000497141664943229	0.0135138323874629	0.0109027457002366	5695	8	PSMB7	GC1
GO:1901990	regulation of mitotic cell cycle phase transition	1979-08-01	439/18862	0.000497141664943229	0.0135138323874629	0.0109027457002366	6500	8	SKP1	GC1
GO:1901990	regulation of mitotic cell cycle phase transition	1979-08-01	439/18862	0.000497141664943229	0.0135138323874629	0.0109027457002366	983	8	CDK1	GC1
GO:1901990	regulation of mitotic cell cycle phase transition	1979-08-01	439/18862	0.000497141664943229	0.0135138323874629	0.0109027457002366	51065	8	RPS27L	GC1
GO:1903311	regulation of mRNA metabolic process	1979-07-01	334/18862	0.000498708934166123	0.0135138323874629	0.0109027457002366	5693	7	PSMB5	GC1
GO:1903311	regulation of mRNA metabolic process	1979-07-01	334/18862	0.000498708934166123	0.0135138323874629	0.0109027457002366	3183	7	HNRNPC	GC1
GO:1903311	regulation of mRNA metabolic process	1979-07-01	334/18862	0.000498708934166123	0.0135138323874629	0.0109027457002366	5685	7	PSMA4	GC1
GO:1903311	regulation of mRNA metabolic process	1979-07-01	334/18862	0.000498708934166123	0.0135138323874629	0.0109027457002366	9337	7	CNOT8	GC1
GO:1903311	regulation of mRNA metabolic process	1979-07-01	334/18862	0.000498708934166123	0.0135138323874629	0.0109027457002366	5695	7	PSMB7	GC1
GO:1903311	regulation of mRNA metabolic process	1979-07-01	334/18862	0.000498708934166123	0.0135138323874629	0.0109027457002366	10247	7	RIDA	GC1
GO:1903311	regulation of mRNA metabolic process	1979-07-01	334/18862	0.000498708934166123	0.0135138323874629	0.0109027457002366	10284	7	SAP18	GC1
GO:0038093	Fc receptor signaling pathway	1979-06-01	239/18862	0.00049940252725288	0.0135138323874629	0.0109027457002366	3514	6	IGKC	GC1
GO:0038093	Fc receptor signaling pathway	1979-06-01	239/18862	0.00049940252725288	0.0135138323874629	0.0109027457002366	5693	6	PSMB5	GC1
GO:0038093	Fc receptor signaling pathway	1979-06-01	239/18862	0.00049940252725288	0.0135138323874629	0.0109027457002366	5685	6	PSMA4	GC1
GO:0038093	Fc receptor signaling pathway	1979-06-01	239/18862	0.00049940252725288	0.0135138323874629	0.0109027457002366	10094	6	ARPC3	GC1
GO:0038093	Fc receptor signaling pathway	1979-06-01	239/18862	0.00049940252725288	0.0135138323874629	0.0109027457002366	5695	6	PSMB7	GC1
GO:0038093	Fc receptor signaling pathway	1979-06-01	239/18862	0.00049940252725288	0.0135138323874629	0.0109027457002366	6500	6	SKP1	GC1
GO:0010951	negative regulation of endopeptidase activity	1979-06-01	245/18862	0.000569033096661025	0.015096113329066	0.0121793048759026	684	6	BST2	GC1
GO:0010951	negative regulation of endopeptidase activity	1979-06-01	245/18862	0.000569033096661025	0.015096113329066	0.0121793048759026	10972	6	TMED10	GC1
GO:0010951	negative regulation of endopeptidase activity	1979-06-01	245/18862	0.000569033096661025	0.015096113329066	0.0121793048759026	302	6	ANXA2	GC1
GO:0010951	negative regulation of endopeptidase activity	1979-06-01	245/18862	0.000569033096661025	0.015096113329066	0.0121793048759026	2597	6	GAPDH	GC1
GO:0010951	negative regulation of endopeptidase activity	1979-06-01	245/18862	0.000569033096661025	0.015096113329066	0.0121793048759026	10935	6	PRDX3	GC1
GO:0010951	negative regulation of endopeptidase activity	1979-06-01	245/18862	0.000569033096661025	0.015096113329066	0.0121793048759026	9232	6	PTTG1	GC1
GO:0045861	negative regulation of proteolysis	1979-07-01	346/18862	0.000614821434936197	0.0159971807974745	0.0129062718224461	684	7	BST2	GC1
GO:0045861	negative regulation of proteolysis	1979-07-01	346/18862	0.000614821434936197	0.0159971807974745	0.0129062718224461	10972	7	TMED10	GC1
GO:0045861	negative regulation of proteolysis	1979-07-01	346/18862	0.000614821434936197	0.0159971807974745	0.0129062718224461	6880	7	TAF9	GC1
GO:0045861	negative regulation of proteolysis	1979-07-01	346/18862	0.000614821434936197	0.0159971807974745	0.0129062718224461	302	7	ANXA2	GC1
GO:0045861	negative regulation of proteolysis	1979-07-01	346/18862	0.000614821434936197	0.0159971807974745	0.0129062718224461	2597	7	GAPDH	GC1
GO:0045861	negative regulation of proteolysis	1979-07-01	346/18862	0.000614821434936197	0.0159971807974745	0.0129062718224461	10935	7	PRDX3	GC1
GO:0045861	negative regulation of proteolysis	1979-07-01	346/18862	0.000614821434936197	0.0159971807974745	0.0129062718224461	9232	7	PTTG1	GC1
GO:0052547	regulation of peptidase activity	1979-08-01	455/18862	0.000628863616953101	0.016053820259199	0.0129519676421125	684	8	BST2	GC1
GO:0052547	regulation of peptidase activity	1979-08-01	455/18862	0.000628863616953101	0.016053820259199	0.0129519676421125	54205	8	CYCS	GC1
GO:0052547	regulation of peptidase activity	1979-08-01	455/18862	0.000628863616953101	0.016053820259199	0.0129519676421125	10972	8	TMED10	GC1
GO:0052547	regulation of peptidase activity	1979-08-01	455/18862	0.000628863616953101	0.016053820259199	0.0129519676421125	302	8	ANXA2	GC1
GO:0052547	regulation of peptidase activity	1979-08-01	455/18862	0.000628863616953101	0.016053820259199	0.0129519676421125	2597	8	GAPDH	GC1
GO:0052547	regulation of peptidase activity	1979-08-01	455/18862	0.000628863616953101	0.016053820259199	0.0129519676421125	10935	8	PRDX3	GC1
GO:0052547	regulation of peptidase activity	1979-08-01	455/18862	0.000628863616953101	0.016053820259199	0.0129519676421125	51065	8	RPS27L	GC1
GO:0052547	regulation of peptidase activity	1979-08-01	455/18862	0.000628863616953101	0.016053820259199	0.0129519676421125	9232	8	PTTG1	GC1
GO:2001243	negative regulation of intrinsic apoptotic signaling pathway	1979-04-01	95/18862	0.000679681964605395	0.0170298092242796	0.0137393800642455	2023	4	ENO1	GC1
GO:2001243	negative regulation of intrinsic apoptotic signaling pathway	1979-04-01	95/18862	0.000679681964605395	0.0170298092242796	0.0137393800642455	10625	4	IVNS1ABP	GC1
GO:2001243	negative regulation of intrinsic apoptotic signaling pathway	1979-04-01	95/18862	0.000679681964605395	0.0170298092242796	0.0137393800642455	6880	4	TAF9	GC1
GO:2001243	negative regulation of intrinsic apoptotic signaling pathway	1979-04-01	95/18862	0.000679681964605395	0.0170298092242796	0.0137393800642455	3301	4	DNAJA1	GC1
GO:0038095	Fc-epsilon receptor signaling pathway	1979-05-01	169/18862	0.000718464904752877	0.0173964994986115	0.0140352199634809	3514	5	IGKC	GC1
GO:0038095	Fc-epsilon receptor signaling pathway	1979-05-01	169/18862	0.000718464904752877	0.0173964994986115	0.0140352199634809	5693	5	PSMB5	GC1
GO:0038095	Fc-epsilon receptor signaling pathway	1979-05-01	169/18862	0.000718464904752877	0.0173964994986115	0.0140352199634809	5685	5	PSMA4	GC1
GO:0038095	Fc-epsilon receptor signaling pathway	1979-05-01	169/18862	0.000718464904752877	0.0173964994986115	0.0140352199634809	5695	5	PSMB7	GC1
GO:0038095	Fc-epsilon receptor signaling pathway	1979-05-01	169/18862	0.000718464904752877	0.0173964994986115	0.0140352199634809	6500	5	SKP1	GC1
GO:0010466	negative regulation of peptidase activity	1979-06-01	257/18862	0.000730811551151431	0.0173964994986115	0.0140352199634809	684	6	BST2	GC1
GO:0010466	negative regulation of peptidase activity	1979-06-01	257/18862	0.000730811551151431	0.0173964994986115	0.0140352199634809	10972	6	TMED10	GC1
GO:0010466	negative regulation of peptidase activity	1979-06-01	257/18862	0.000730811551151431	0.0173964994986115	0.0140352199634809	302	6	ANXA2	GC1
GO:0010466	negative regulation of peptidase activity	1979-06-01	257/18862	0.000730811551151431	0.0173964994986115	0.0140352199634809	2597	6	GAPDH	GC1
GO:0010466	negative regulation of peptidase activity	1979-06-01	257/18862	0.000730811551151431	0.0173964994986115	0.0140352199634809	10935	6	PRDX3	GC1
GO:0010466	negative regulation of peptidase activity	1979-06-01	257/18862	0.000730811551151431	0.0173964994986115	0.0140352199634809	9232	6	PTTG1	GC1
GO:0046364	monosaccharide biosynthetic process	1979-04-01	97/18862	0.000735078755744647	0.0173964994986115	0.0140352199634809	7167	4	TPI1	GC1
GO:0046364	monosaccharide biosynthetic process	1979-04-01	97/18862	0.000735078755744647	0.0173964994986115	0.0140352199634809	2023	4	ENO1	GC1
GO:0046364	monosaccharide biosynthetic process	1979-04-01	97/18862	0.000735078755744647	0.0173964994986115	0.0140352199634809	6888	4	TALDO1	GC1
GO:0046364	monosaccharide biosynthetic process	1979-04-01	97/18862	0.000735078755744647	0.0173964994986115	0.0140352199634809	2597	4	GAPDH	GC1
GO:0000086	G2/M transition of mitotic cell cycle	1979-06-01	258/18862	0.000745747945986302	0.0173964994986115	0.0140352199634809	5693	6	PSMB5	GC1
GO:0000086	G2/M transition of mitotic cell cycle	1979-06-01	258/18862	0.000745747945986302	0.0173964994986115	0.0140352199634809	5685	6	PSMA4	GC1
GO:0000086	G2/M transition of mitotic cell cycle	1979-06-01	258/18862	0.000745747945986302	0.0173964994986115	0.0140352199634809	9978	6	RBX1	GC1
GO:0000086	G2/M transition of mitotic cell cycle	1979-06-01	258/18862	0.000745747945986302	0.0173964994986115	0.0140352199634809	5695	6	PSMB7	GC1
GO:0000086	G2/M transition of mitotic cell cycle	1979-06-01	258/18862	0.000745747945986302	0.0173964994986115	0.0140352199634809	6500	6	SKP1	GC1
GO:0000086	G2/M transition of mitotic cell cycle	1979-06-01	258/18862	0.000745747945986302	0.0173964994986115	0.0140352199634809	983	6	CDK1	GC1
GO:0042989	sequestering of actin monomers	1979-02-01	10/18862	0.000762644853810238	0.0174420289422224	0.0140719523966893	7114	2	TMSB4X	GC1
GO:0042989	sequestering of actin monomers	1979-02-01	10/18862	0.000762644853810238	0.0174420289422224	0.0140719523966893	5756	2	TWF1	GC1
GO:0006734	NADH metabolic process	1979-03-01	43/18862	0.000773482436462189	0.0174420289422224	0.0140719523966893	7167	3	TPI1	GC1
GO:0006734	NADH metabolic process	1979-03-01	43/18862	0.000773482436462189	0.0174420289422224	0.0140719523966893	2023	3	ENO1	GC1
GO:0006734	NADH metabolic process	1979-03-01	43/18862	0.000773482436462189	0.0174420289422224	0.0140719523966893	2597	3	GAPDH	GC1
GO:1901987	regulation of cell cycle phase transition	1979-08-01	478/18862	0.000866412183282424	0.0192173062947724	0.0155042180166328	5693	8	PSMB5	GC1
GO:1901987	regulation of cell cycle phase transition	1979-08-01	478/18862	0.000866412183282424	0.0192173062947724	0.0155042180166328	5685	8	PSMA4	GC1
GO:1901987	regulation of cell cycle phase transition	1979-08-01	478/18862	0.000866412183282424	0.0192173062947724	0.0155042180166328	9978	8	RBX1	GC1
GO:1901987	regulation of cell cycle phase transition	1979-08-01	478/18862	0.000866412183282424	0.0192173062947724	0.0155042180166328	9337	8	CNOT8	GC1
GO:1901987	regulation of cell cycle phase transition	1979-08-01	478/18862	0.000866412183282424	0.0192173062947724	0.0155042180166328	5695	8	PSMB7	GC1
GO:1901987	regulation of cell cycle phase transition	1979-08-01	478/18862	0.000866412183282424	0.0192173062947724	0.0155042180166328	6500	8	SKP1	GC1
GO:1901987	regulation of cell cycle phase transition	1979-08-01	478/18862	0.000866412183282424	0.0192173062947724	0.0155042180166328	983	8	CDK1	GC1
GO:1901987	regulation of cell cycle phase transition	1979-08-01	478/18862	0.000866412183282424	0.0192173062947724	0.0155042180166328	51065	8	RPS27L	GC1
GO:0071347	cellular response to interleukin-1	1979-05-01	180/18862	0.000953741760554538	0.0208131064843595	0.0167916843072166	5693	5	PSMB5	GC1
GO:0071347	cellular response to interleukin-1	1979-05-01	180/18862	0.000953741760554538	0.0208131064843595	0.0167916843072166	5685	5	PSMA4	GC1
GO:0071347	cellular response to interleukin-1	1979-05-01	180/18862	0.000953741760554538	0.0208131064843595	0.0167916843072166	9978	5	RBX1	GC1
GO:0071347	cellular response to interleukin-1	1979-05-01	180/18862	0.000953741760554538	0.0208131064843595	0.0167916843072166	5695	5	PSMB7	GC1
GO:0071347	cellular response to interleukin-1	1979-05-01	180/18862	0.000953741760554538	0.0208131064843595	0.0167916843072166	6500	5	SKP1	GC1
GO:0035722	interleukin-12-mediated signaling pathway	1979-03-01	47/18862	0.00100414006728564	0.0215651033498012	0.0173983834548907	9446	3	GSTO1	GC1
GO:0035722	interleukin-12-mediated signaling pathway	1979-03-01	47/18862	0.00100414006728564	0.0215651033498012	0.0173983834548907	302	3	ANXA2	GC1
GO:0035722	interleukin-12-mediated signaling pathway	1979-03-01	47/18862	0.00100414006728564	0.0215651033498012	0.0173983834548907	6888	3	TALDO1	GC1
GO:0044839	cell cycle G2/M phase transition	1979-06-01	276/18862	0.0010573593412447	0.0219647562260918	0.0177208170587445	5693	6	PSMB5	GC1
GO:0044839	cell cycle G2/M phase transition	1979-06-01	276/18862	0.0010573593412447	0.0219647562260918	0.0177208170587445	5685	6	PSMA4	GC1
GO:0044839	cell cycle G2/M phase transition	1979-06-01	276/18862	0.0010573593412447	0.0219647562260918	0.0177208170587445	9978	6	RBX1	GC1
GO:0044839	cell cycle G2/M phase transition	1979-06-01	276/18862	0.0010573593412447	0.0219647562260918	0.0177208170587445	5695	6	PSMB7	GC1
GO:0044839	cell cycle G2/M phase transition	1979-06-01	276/18862	0.0010573593412447	0.0219647562260918	0.0177208170587445	6500	6	SKP1	GC1
GO:0044839	cell cycle G2/M phase transition	1979-06-01	276/18862	0.0010573593412447	0.0219647562260918	0.0177208170587445	983	6	CDK1	GC1
GO:0018198	peptidyl-cysteine modification	1979-03-01	48/18862	0.00106786875662034	0.0219647562260918	0.0177208170587445	2597	3	GAPDH	GC1
GO:0018198	peptidyl-cysteine modification	1979-03-01	48/18862	0.00106786875662034	0.0219647562260918	0.0177208170587445	128	3	ADH5	GC1
GO:0018198	peptidyl-cysteine modification	1979-03-01	48/18862	0.00106786875662034	0.0219647562260918	0.0177208170587445	10935	3	PRDX3	GC1
GO:0008064	regulation of actin polymerization or depolymerization	1979-05-01	185/18862	0.00107782256865642	0.0219647562260918	0.0177208170587445	10456	5	HAX1	GC1
GO:0008064	regulation of actin polymerization or depolymerization	1979-05-01	185/18862	0.00107782256865642	0.0219647562260918	0.0177208170587445	7114	5	TMSB4X	GC1
GO:0008064	regulation of actin polymerization or depolymerization	1979-05-01	185/18862	0.00107782256865642	0.0219647562260918	0.0177208170587445	5756	5	TWF1	GC1
GO:0008064	regulation of actin polymerization or depolymerization	1979-05-01	185/18862	0.00107782256865642	0.0219647562260918	0.0177208170587445	10094	5	ARPC3	GC1
GO:0008064	regulation of actin polymerization or depolymerization	1979-05-01	185/18862	0.00107782256865642	0.0219647562260918	0.0177208170587445	11034	5	DSTN	GC1
GO:0030832	regulation of actin filament length	1979-05-01	186/18862	0.00110401095368196	0.0219647562260918	0.0177208170587445	10456	5	HAX1	GC1
GO:0030832	regulation of actin filament length	1979-05-01	186/18862	0.00110401095368196	0.0219647562260918	0.0177208170587445	7114	5	TMSB4X	GC1
GO:0030832	regulation of actin filament length	1979-05-01	186/18862	0.00110401095368196	0.0219647562260918	0.0177208170587445	5756	5	TWF1	GC1
GO:0030832	regulation of actin filament length	1979-05-01	186/18862	0.00110401095368196	0.0219647562260918	0.0177208170587445	10094	5	ARPC3	GC1
GO:0030832	regulation of actin filament length	1979-05-01	186/18862	0.00110401095368196	0.0219647562260918	0.0177208170587445	11034	5	DSTN	GC1
GO:2001171	positive regulation of ATP biosynthetic process	1979-02-01	12/18862	0.00111248074117213	0.0219647562260918	0.0177208170587445	2023	2	ENO1	GC1
GO:2001171	positive regulation of ATP biosynthetic process	1979-02-01	12/18862	0.00111248074117213	0.0219647562260918	0.0177208170587445	7114	2	TMSB4X	GC1
GO:0071349	cellular response to interleukin-12	1979-03-01	49/18862	0.00113409963080303	0.0219647562260918	0.0177208170587445	9446	3	GSTO1	GC1
GO:0071349	cellular response to interleukin-12	1979-03-01	49/18862	0.00113409963080303	0.0219647562260918	0.0177208170587445	302	3	ANXA2	GC1
GO:0071349	cellular response to interleukin-12	1979-03-01	49/18862	0.00113409963080303	0.0219647562260918	0.0177208170587445	6888	3	TALDO1	GC1
GO:0043618	regulation of transcription from RNA polymerase II promoter in response to stress	1979-04-01	109/18862	0.00113638797917696	0.0219647562260918	0.0177208170587445	5693	4	PSMB5	GC1
GO:0043618	regulation of transcription from RNA polymerase II promoter in response to stress	1979-04-01	109/18862	0.00113638797917696	0.0219647562260918	0.0177208170587445	5685	4	PSMA4	GC1
GO:0043618	regulation of transcription from RNA polymerase II promoter in response to stress	1979-04-01	109/18862	0.00113638797917696	0.0219647562260918	0.0177208170587445	9978	4	RBX1	GC1
GO:0043618	regulation of transcription from RNA polymerase II promoter in response to stress	1979-04-01	109/18862	0.00113638797917696	0.0219647562260918	0.0177208170587445	5695	4	PSMB7	GC1
GO:0043488	regulation of mRNA stability	1979-05-01	188/18862	0.00115780151284696	0.0220634569983371	0.0178004472768317	5693	5	PSMB5	GC1
GO:0043488	regulation of mRNA stability	1979-05-01	188/18862	0.00115780151284696	0.0220634569983371	0.0178004472768317	3183	5	HNRNPC	GC1
GO:0043488	regulation of mRNA stability	1979-05-01	188/18862	0.00115780151284696	0.0220634569983371	0.0178004472768317	5685	5	PSMA4	GC1
GO:0043488	regulation of mRNA stability	1979-05-01	188/18862	0.00115780151284696	0.0220634569983371	0.0178004472768317	5695	5	PSMB7	GC1
GO:0043488	regulation of mRNA stability	1979-05-01	188/18862	0.00115780151284696	0.0220634569983371	0.0178004472768317	10247	5	RIDA	GC1
GO:0070671	response to interleukin-12	1979-03-01	50/18862	0.00120286989784167	0.0225736262579352	0.0182120437464339	9446	3	GSTO1	GC1
GO:0070671	response to interleukin-12	1979-03-01	50/18862	0.00120286989784167	0.0225736262579352	0.0182120437464339	302	3	ANXA2	GC1
GO:0070671	response to interleukin-12	1979-03-01	50/18862	0.00120286989784167	0.0225736262579352	0.0182120437464339	6888	3	TALDO1	GC1
GO:0032970	regulation of actin filament-based process	1979-07-01	389/18862	0.00121794140194329	0.0225736262579352	0.0182120437464339	684	7	BST2	GC1
GO:0032970	regulation of actin filament-based process	1979-07-01	389/18862	0.00121794140194329	0.0225736262579352	0.0182120437464339	10456	7	HAX1	GC1
GO:0032970	regulation of actin filament-based process	1979-07-01	389/18862	0.00121794140194329	0.0225736262579352	0.0182120437464339	7114	7	TMSB4X	GC1
GO:0032970	regulation of actin filament-based process	1979-07-01	389/18862	0.00121794140194329	0.0225736262579352	0.0182120437464339	5756	7	TWF1	GC1
GO:0032970	regulation of actin filament-based process	1979-07-01	389/18862	0.00121794140194329	0.0225736262579352	0.0182120437464339	10094	7	ARPC3	GC1
GO:0032970	regulation of actin filament-based process	1979-07-01	389/18862	0.00121794140194329	0.0225736262579352	0.0182120437464339	11034	7	DSTN	GC1
GO:0032970	regulation of actin filament-based process	1979-07-01	389/18862	0.00121794140194329	0.0225736262579352	0.0182120437464339	58527	7	ABRACL	GC1
GO:0019674	NAD metabolic process	1979-03-01	51/18862	0.00127421618629429	0.0232974932440023	0.0187960481534449	7167	3	TPI1	GC1
GO:0019674	NAD metabolic process	1979-03-01	51/18862	0.00127421618629429	0.0232974932440023	0.0187960481534449	2023	3	ENO1	GC1
GO:0019674	NAD metabolic process	1979-03-01	51/18862	0.00127421618629429	0.0232974932440023	0.0187960481534449	2597	3	GAPDH	GC1
GO:0002223	stimulatory C-type lectin receptor signaling pathway	1979-04-01	114/18862	0.0013417193816187	0.0242046176444014	0.019527901736682	5693	4	PSMB5	GC1
GO:0002223	stimulatory C-type lectin receptor signaling pathway	1979-04-01	114/18862	0.0013417193816187	0.0242046176444014	0.019527901736682	5685	4	PSMA4	GC1
GO:0002223	stimulatory C-type lectin receptor signaling pathway	1979-04-01	114/18862	0.0013417193816187	0.0242046176444014	0.019527901736682	5695	4	PSMB7	GC1
GO:0002223	stimulatory C-type lectin receptor signaling pathway	1979-04-01	114/18862	0.0013417193816187	0.0242046176444014	0.019527901736682	6500	4	SKP1	GC1
GO:0043620	regulation of DNA-templated transcription in response to stress	1979-04-01	115/18862	0.00138569328093089	0.0243486105077857	0.0196440728957667	5693	4	PSMB5	GC1
GO:0043620	regulation of DNA-templated transcription in response to stress	1979-04-01	115/18862	0.00138569328093089	0.0243486105077857	0.0196440728957667	5685	4	PSMA4	GC1
GO:0043620	regulation of DNA-templated transcription in response to stress	1979-04-01	115/18862	0.00138569328093089	0.0243486105077857	0.0196440728957667	9978	4	RBX1	GC1
GO:0043620	regulation of DNA-templated transcription in response to stress	1979-04-01	115/18862	0.00138569328093089	0.0243486105077857	0.0196440728957667	5695	4	PSMB7	GC1
GO:1990748	cellular detoxification	1979-04-01	115/18862	0.00138569328093089	0.0243486105077857	0.0196440728957667	9446	4	GSTO1	GC1
GO:1990748	cellular detoxification	1979-04-01	115/18862	0.00138569328093089	0.0243486105077857	0.0196440728957667	5052	4	PRDX1	GC1
GO:1990748	cellular detoxification	1979-04-01	115/18862	0.00138569328093089	0.0243486105077857	0.0196440728957667	128	4	ADH5	GC1
GO:1990748	cellular detoxification	1979-04-01	115/18862	0.00138569328093089	0.0243486105077857	0.0196440728957667	10935	4	PRDX3	GC1
GO:0043487	regulation of RNA stability	1979-05-01	198/18862	0.00145639853788234	0.0252629130994205	0.0203817177298783	5693	5	PSMB5	GC1
GO:0043487	regulation of RNA stability	1979-05-01	198/18862	0.00145639853788234	0.0252629130994205	0.0203817177298783	3183	5	HNRNPC	GC1
GO:0043487	regulation of RNA stability	1979-05-01	198/18862	0.00145639853788234	0.0252629130994205	0.0203817177298783	5685	5	PSMA4	GC1
GO:0043487	regulation of RNA stability	1979-05-01	198/18862	0.00145639853788234	0.0252629130994205	0.0203817177298783	5695	5	PSMB7	GC1
GO:0043487	regulation of RNA stability	1979-05-01	198/18862	0.00145639853788234	0.0252629130994205	0.0203817177298783	10247	5	RIDA	GC1
GO:0002220	innate immune response activating cell surface receptor signaling pathway	1979-04-01	118/18862	0.00152364633408403	0.025801083426111	0.0208159050164368	5693	4	PSMB5	GC1
GO:0002220	innate immune response activating cell surface receptor signaling pathway	1979-04-01	118/18862	0.00152364633408403	0.025801083426111	0.0208159050164368	5685	4	PSMA4	GC1
GO:0002220	innate immune response activating cell surface receptor signaling pathway	1979-04-01	118/18862	0.00152364633408403	0.025801083426111	0.0208159050164368	5695	4	PSMB7	GC1
GO:0002220	innate immune response activating cell surface receptor signaling pathway	1979-04-01	118/18862	0.00152364633408403	0.025801083426111	0.0208159050164368	6500	4	SKP1	GC1
GO:0006122	mitochondrial electron transport, ubiquinol to cytochrome c	1979-02-01	14/18862	0.0015255629520243	0.025801083426111	0.0208159050164368	54205	2	CYCS	GC1
GO:0006122	mitochondrial electron transport, ubiquinol to cytochrome c	1979-02-01	14/18862	0.0015255629520243	0.025801083426111	0.0208159050164368	7388	2	UQCRH	GC1
GO:0002758	innate immune response-activating signal transduction	1979-04-01	119/18862	0.00157168104676673	0.0262528945219184	0.0211804190447966	5693	4	PSMB5	GC1
GO:0002758	innate immune response-activating signal transduction	1979-04-01	119/18862	0.00157168104676673	0.0262528945219184	0.0211804190447966	5685	4	PSMA4	GC1
GO:0002758	innate immune response-activating signal transduction	1979-04-01	119/18862	0.00157168104676673	0.0262528945219184	0.0211804190447966	5695	4	PSMB7	GC1
GO:0002758	innate immune response-activating signal transduction	1979-04-01	119/18862	0.00157168104676673	0.0262528945219184	0.0211804190447966	6500	4	SKP1	GC1
GO:0050852	T cell receptor signaling pathway	1979-05-01	204/18862	0.001660806375057	0.0272365422264811	0.0219740104165098	5693	5	PSMB5	GC1
GO:0050852	T cell receptor signaling pathway	1979-05-01	204/18862	0.001660806375057	0.0272365422264811	0.0219740104165098	5685	5	PSMA4	GC1
GO:0050852	T cell receptor signaling pathway	1979-05-01	204/18862	0.001660806375057	0.0272365422264811	0.0219740104165098	3127	5	HLA-DRB5	GC1
GO:0050852	T cell receptor signaling pathway	1979-05-01	204/18862	0.001660806375057	0.0272365422264811	0.0219740104165098	5695	5	PSMB7	GC1
GO:0050852	T cell receptor signaling pathway	1979-05-01	204/18862	0.001660806375057	0.0272365422264811	0.0219740104165098	6500	5	SKP1	GC1
GO:0019320	hexose catabolic process	1979-03-01	56/18862	0.00167083001093712	0.0272365422264811	0.0219740104165098	7167	3	TPI1	GC1
GO:0019320	hexose catabolic process	1979-03-01	56/18862	0.00167083001093712	0.0272365422264811	0.0219740104165098	2023	3	ENO1	GC1
GO:0019320	hexose catabolic process	1979-03-01	56/18862	0.00167083001093712	0.0272365422264811	0.0219740104165098	2597	3	GAPDH	GC1
GO:0097237	cellular response to toxic substance	1979-04-01	122/18862	0.0017221034268185	0.027591795938581	0.02226062347867	9446	4	GSTO1	GC1
GO:0097237	cellular response to toxic substance	1979-04-01	122/18862	0.0017221034268185	0.027591795938581	0.02226062347867	5052	4	PRDX1	GC1
GO:0097237	cellular response to toxic substance	1979-04-01	122/18862	0.0017221034268185	0.027591795938581	0.02226062347867	128	4	ADH5	GC1
GO:0097237	cellular response to toxic substance	1979-04-01	122/18862	0.0017221034268185	0.027591795938581	0.02226062347867	10935	4	PRDX3	GC1
GO:0071456	cellular response to hypoxia	1979-05-01	206/18862	0.00173340920530627	0.027591795938581	0.02226062347867	5693	5	PSMB5	GC1
GO:0071456	cellular response to hypoxia	1979-05-01	206/18862	0.00173340920530627	0.027591795938581	0.02226062347867	5685	5	PSMA4	GC1
GO:0071456	cellular response to hypoxia	1979-05-01	206/18862	0.00173340920530627	0.027591795938581	0.02226062347867	2023	5	ENO1	GC1
GO:0071456	cellular response to hypoxia	1979-05-01	206/18862	0.00173340920530627	0.027591795938581	0.02226062347867	9978	5	RBX1	GC1
GO:0071456	cellular response to hypoxia	1979-05-01	206/18862	0.00173340920530627	0.027591795938581	0.02226062347867	5695	5	PSMB7	GC1
GO:0017014	protein nitrosylation	1979-02-01	16/18862	0.00200083651416016	0.0311164575133183	0.0251042645515316	2597	2	GAPDH	GC1
GO:0017014	protein nitrosylation	1979-02-01	16/18862	0.00200083651416016	0.0311164575133183	0.0251042645515316	128	2	ADH5	GC1
GO:0018119	peptidyl-cysteine S-nitrosylation	1979-02-01	16/18862	0.00200083651416016	0.0311164575133183	0.0251042645515316	2597	2	GAPDH	GC1
GO:0018119	peptidyl-cysteine S-nitrosylation	1979-02-01	16/18862	0.00200083651416016	0.0311164575133183	0.0251042645515316	128	2	ADH5	GC1
GO:0036294	cellular response to decreased oxygen levels	1979-05-01	214/18862	0.00204731865789157	0.0314775243650829	0.0253955675626024	5693	5	PSMB5	GC1
GO:0036294	cellular response to decreased oxygen levels	1979-05-01	214/18862	0.00204731865789157	0.0314775243650829	0.0253955675626024	5685	5	PSMA4	GC1
GO:0036294	cellular response to decreased oxygen levels	1979-05-01	214/18862	0.00204731865789157	0.0314775243650829	0.0253955675626024	2023	5	ENO1	GC1
GO:0036294	cellular response to decreased oxygen levels	1979-05-01	214/18862	0.00204731865789157	0.0314775243650829	0.0253955675626024	9978	5	RBX1	GC1
GO:0036294	cellular response to decreased oxygen levels	1979-05-01	214/18862	0.00204731865789157	0.0314775243650829	0.0253955675626024	5695	5	PSMB7	GC1
GO:0008154	actin polymerization or depolymerization	1979-05-01	215/18862	0.00208929148804211	0.0317619256552919	0.0256250180141889	10456	5	HAX1	GC1
GO:0008154	actin polymerization or depolymerization	1979-05-01	215/18862	0.00208929148804211	0.0317619256552919	0.0256250180141889	7114	5	TMSB4X	GC1
GO:0008154	actin polymerization or depolymerization	1979-05-01	215/18862	0.00208929148804211	0.0317619256552919	0.0256250180141889	5756	5	TWF1	GC1
GO:0008154	actin polymerization or depolymerization	1979-05-01	215/18862	0.00208929148804211	0.0317619256552919	0.0256250180141889	10094	5	ARPC3	GC1
GO:0008154	actin polymerization or depolymerization	1979-05-01	215/18862	0.00208929148804211	0.0317619256552919	0.0256250180141889	11034	5	DSTN	GC1
GO:0006521	regulation of cellular amino acid metabolic process	1979-03-01	62/18862	0.00223895326197585	0.0328956058948116	0.026539653256249	5693	3	PSMB5	GC1
GO:0006521	regulation of cellular amino acid metabolic process	1979-03-01	62/18862	0.00223895326197585	0.0328956058948116	0.026539653256249	5685	3	PSMA4	GC1
GO:0006521	regulation of cellular amino acid metabolic process	1979-03-01	62/18862	0.00223895326197585	0.0328956058948116	0.026539653256249	5695	3	PSMB7	GC1
GO:0031571	mitotic G1 DNA damage checkpoint	1979-03-01	62/18862	0.00223895326197585	0.0328956058948116	0.026539653256249	9337	3	CNOT8	GC1
GO:0031571	mitotic G1 DNA damage checkpoint	1979-03-01	62/18862	0.00223895326197585	0.0328956058948116	0.026539653256249	983	3	CDK1	GC1
GO:0031571	mitotic G1 DNA damage checkpoint	1979-03-01	62/18862	0.00223895326197585	0.0328956058948116	0.026539653256249	51065	3	RPS27L	GC1
GO:0046365	monosaccharide catabolic process	1979-03-01	62/18862	0.00223895326197585	0.0328956058948116	0.026539653256249	7167	3	TPI1	GC1
GO:0046365	monosaccharide catabolic process	1979-03-01	62/18862	0.00223895326197585	0.0328956058948116	0.026539653256249	2023	3	ENO1	GC1
GO:0046365	monosaccharide catabolic process	1979-03-01	62/18862	0.00223895326197585	0.0328956058948116	0.026539653256249	2597	3	GAPDH	GC1
GO:0006081	cellular aldehyde metabolic process	1979-03-01	63/18862	0.00234386459607985	0.0328956058948116	0.026539653256249	7167	3	TPI1	GC1
GO:0006081	cellular aldehyde metabolic process	1979-03-01	63/18862	0.00234386459607985	0.0328956058948116	0.026539653256249	6888	3	TALDO1	GC1
GO:0006081	cellular aldehyde metabolic process	1979-03-01	63/18862	0.00234386459607985	0.0328956058948116	0.026539653256249	128	3	ADH5	GC1
GO:0044783	G1 DNA damage checkpoint	1979-03-01	63/18862	0.00234386459607985	0.0328956058948116	0.026539653256249	9337	3	CNOT8	GC1
GO:0044783	G1 DNA damage checkpoint	1979-03-01	63/18862	0.00234386459607985	0.0328956058948116	0.026539653256249	983	3	CDK1	GC1
GO:0044783	G1 DNA damage checkpoint	1979-03-01	63/18862	0.00234386459607985	0.0328956058948116	0.026539653256249	51065	3	RPS27L	GC1
GO:0044819	mitotic G1/S transition checkpoint	1979-03-01	63/18862	0.00234386459607985	0.0328956058948116	0.026539653256249	9337	3	CNOT8	GC1
GO:0044819	mitotic G1/S transition checkpoint	1979-03-01	63/18862	0.00234386459607985	0.0328956058948116	0.026539653256249	983	3	CDK1	GC1
GO:0044819	mitotic G1/S transition checkpoint	1979-03-01	63/18862	0.00234386459607985	0.0328956058948116	0.026539653256249	51065	3	RPS27L	GC1
GO:0050851	antigen receptor-mediated signaling pathway	1979-06-01	323/18862	0.00234556469787111	0.0328956058948116	0.026539653256249	3514	6	IGKC	GC1
GO:0050851	antigen receptor-mediated signaling pathway	1979-06-01	323/18862	0.00234556469787111	0.0328956058948116	0.026539653256249	5693	6	PSMB5	GC1
GO:0050851	antigen receptor-mediated signaling pathway	1979-06-01	323/18862	0.00234556469787111	0.0328956058948116	0.026539653256249	5685	6	PSMA4	GC1
GO:0050851	antigen receptor-mediated signaling pathway	1979-06-01	323/18862	0.00234556469787111	0.0328956058948116	0.026539653256249	3127	6	HLA-DRB5	GC1
GO:0050851	antigen receptor-mediated signaling pathway	1979-06-01	323/18862	0.00234556469787111	0.0328956058948116	0.026539653256249	5695	6	PSMB7	GC1
GO:0050851	antigen receptor-mediated signaling pathway	1979-06-01	323/18862	0.00234556469787111	0.0328956058948116	0.026539653256249	6500	6	SKP1	GC1
GO:0062012	regulation of small molecule metabolic process	1979-07-01	437/18862	0.00235836938048538	0.0328956058948116	0.026539653256249	2170	7	FABP3	GC1
GO:0062012	regulation of small molecule metabolic process	1979-07-01	437/18862	0.00235836938048538	0.0328956058948116	0.026539653256249	5693	7	PSMB5	GC1
GO:0062012	regulation of small molecule metabolic process	1979-07-01	437/18862	0.00235836938048538	0.0328956058948116	0.026539653256249	5685	7	PSMA4	GC1
GO:0062012	regulation of small molecule metabolic process	1979-07-01	437/18862	0.00235836938048538	0.0328956058948116	0.026539653256249	2023	7	ENO1	GC1
GO:0062012	regulation of small molecule metabolic process	1979-07-01	437/18862	0.00235836938048538	0.0328956058948116	0.026539653256249	7114	7	TMSB4X	GC1
GO:0062012	regulation of small molecule metabolic process	1979-07-01	437/18862	0.00235836938048538	0.0328956058948116	0.026539653256249	5695	7	PSMB7	GC1
GO:0062012	regulation of small molecule metabolic process	1979-07-01	437/18862	0.00235836938048538	0.0328956058948116	0.026539653256249	3422	7	IDI1	GC1
GO:0032507	maintenance of protein location in cell	1979-03-01	64/18862	0.00245177760787332	0.0338495418719654	0.027309273677386	7114	3	TMSB4X	GC1
GO:0032507	maintenance of protein location in cell	1979-03-01	64/18862	0.00245177760787332	0.0338495418719654	0.027309273677386	5756	3	TWF1	GC1
GO:0032507	maintenance of protein location in cell	1979-03-01	64/18862	0.00245177760787332	0.0338495418719654	0.027309273677386	6500	3	SKP1	GC1
GO:0006513	protein monoubiquitination	1979-03-01	66/18862	0.0026767242474091	0.0364821412443645	0.0294332131095857	9978	3	RBX1	GC1
GO:0006513	protein monoubiquitination	1979-03-01	66/18862	0.0026767242474091	0.0364821412443645	0.0294332131095857	29089	3	UBE2T	GC1
GO:0006513	protein monoubiquitination	1979-03-01	66/18862	0.0026767242474091	0.0364821412443645	0.0294332131095857	6500	3	SKP1	GC1
GO:0098754	detoxification	1979-04-01	138/18862	0.00269638885767661	0.0364821412443645	0.0294332131095857	9446	4	GSTO1	GC1
GO:0098754	detoxification	1979-04-01	138/18862	0.00269638885767661	0.0364821412443645	0.0294332131095857	5052	4	PRDX1	GC1
GO:0098754	detoxification	1979-04-01	138/18862	0.00269638885767661	0.0364821412443645	0.0294332131095857	128	4	ADH5	GC1
GO:0098754	detoxification	1979-04-01	138/18862	0.00269638885767661	0.0364821412443645	0.0294332131095857	10935	4	PRDX3	GC1
GO:0071453	cellular response to oxygen levels	1979-05-01	231/18862	0.00284976235383373	0.0381755293538321	0.0307994117866137	5693	5	PSMB5	GC1
GO:0071453	cellular response to oxygen levels	1979-05-01	231/18862	0.00284976235383373	0.0381755293538321	0.0307994117866137	5685	5	PSMA4	GC1
GO:0071453	cellular response to oxygen levels	1979-05-01	231/18862	0.00284976235383373	0.0381755293538321	0.0307994117866137	2023	5	ENO1	GC1
GO:0071453	cellular response to oxygen levels	1979-05-01	231/18862	0.00284976235383373	0.0381755293538321	0.0307994117866137	9978	5	RBX1	GC1
GO:0071453	cellular response to oxygen levels	1979-05-01	231/18862	0.00284976235383373	0.0381755293538321	0.0307994117866137	5695	5	PSMB7	GC1
GO:0001666	response to hypoxia	1979-06-01	348/18862	0.00339059832312243	0.0442536051641307	0.0357031069788023	5693	6	PSMB5	GC1
GO:0001666	response to hypoxia	1979-06-01	348/18862	0.00339059832312243	0.0442536051641307	0.0357031069788023	5685	6	PSMA4	GC1
GO:0001666	response to hypoxia	1979-06-01	348/18862	0.00339059832312243	0.0442536051641307	0.0357031069788023	2023	6	ENO1	GC1
GO:0001666	response to hypoxia	1979-06-01	348/18862	0.00339059832312243	0.0442536051641307	0.0357031069788023	139341	6	FUNDC1	GC1
GO:0001666	response to hypoxia	1979-06-01	348/18862	0.00339059832312243	0.0442536051641307	0.0357031069788023	9978	6	RBX1	GC1
GO:0001666	response to hypoxia	1979-06-01	348/18862	0.00339059832312243	0.0442536051641307	0.0357031069788023	5695	6	PSMB7	GC1
GO:0006123	mitochondrial electron transport, cytochrome c to oxygen	1979-02-01	21/18862	0.00345429974471326	0.0442536051641307	0.0357031069788023	54205	2	CYCS	GC1
GO:0006123	mitochondrial electron transport, cytochrome c to oxygen	1979-02-01	21/18862	0.00345429974471326	0.0442536051641307	0.0357031069788023	1340	2	COX6B1	GC1
GO:0019646	aerobic electron transport chain	1979-02-01	21/18862	0.00345429974471326	0.0442536051641307	0.0357031069788023	54205	2	CYCS	GC1
GO:0019646	aerobic electron transport chain	1979-02-01	21/18862	0.00345429974471326	0.0442536051641307	0.0357031069788023	1340	2	COX6B1	GC1
GO:2001169	regulation of ATP biosynthetic process	1979-02-01	21/18862	0.00345429974471326	0.0442536051641307	0.0357031069788023	2023	2	ENO1	GC1
GO:2001169	regulation of ATP biosynthetic process	1979-02-01	21/18862	0.00345429974471326	0.0442536051641307	0.0357031069788023	7114	2	TMSB4X	GC1
GO:0002218	activation of innate immune response	1979-04-01	148/18862	0.0034670230209888	0.0442536051641307	0.0357031069788023	5693	4	PSMB5	GC1
GO:0002218	activation of innate immune response	1979-04-01	148/18862	0.0034670230209888	0.0442536051641307	0.0357031069788023	5685	4	PSMA4	GC1
GO:0002218	activation of innate immune response	1979-04-01	148/18862	0.0034670230209888	0.0442536051641307	0.0357031069788023	5695	4	PSMB7	GC1
GO:0002218	activation of innate immune response	1979-04-01	148/18862	0.0034670230209888	0.0442536051641307	0.0357031069788023	6500	4	SKP1	GC1
GO:0032956	regulation of actin cytoskeleton organization	1979-06-01	352/18862	0.00358561903213092	0.0453396500044218	0.0365793107360528	684	6	BST2	GC1
GO:0032956	regulation of actin cytoskeleton organization	1979-06-01	352/18862	0.00358561903213092	0.0453396500044218	0.0365793107360528	10456	6	HAX1	GC1
GO:0032956	regulation of actin cytoskeleton organization	1979-06-01	352/18862	0.00358561903213092	0.0453396500044218	0.0365793107360528	7114	6	TMSB4X	GC1
GO:0032956	regulation of actin cytoskeleton organization	1979-06-01	352/18862	0.00358561903213092	0.0453396500044218	0.0365793107360528	5756	6	TWF1	GC1
GO:0032956	regulation of actin cytoskeleton organization	1979-06-01	352/18862	0.00358561903213092	0.0453396500044218	0.0365793107360528	10094	6	ARPC3	GC1
GO:0032956	regulation of actin cytoskeleton organization	1979-06-01	352/18862	0.00358561903213092	0.0453396500044218	0.0365793107360528	11034	6	DSTN	GC1
GO:1902036	regulation of hematopoietic stem cell differentiation	1979-03-01	74/18862	0.00370213689069568	0.0463795482695486	0.0374182841681425	5693	3	PSMB5	GC1
GO:1902036	regulation of hematopoietic stem cell differentiation	1979-03-01	74/18862	0.00370213689069568	0.0463795482695486	0.0374182841681425	5685	3	PSMA4	GC1
GO:1902036	regulation of hematopoietic stem cell differentiation	1979-03-01	74/18862	0.00370213689069568	0.0463795482695486	0.0374182841681425	5695	3	PSMB7	GC1
GO:0030810	positive regulation of nucleotide biosynthetic process	1979-02-01	22/18862	0.00378944724686101	0.0466102011363904	0.03760437124397	2023	2	ENO1	GC1
GO:0030810	positive regulation of nucleotide biosynthetic process	1979-02-01	22/18862	0.00378944724686101	0.0466102011363904	0.03760437124397	7114	2	TMSB4X	GC1
GO:1900373	positive regulation of purine nucleotide biosynthetic process	1979-02-01	22/18862	0.00378944724686101	0.0466102011363904	0.03760437124397	2023	2	ENO1	GC1
GO:1900373	positive regulation of purine nucleotide biosynthetic process	1979-02-01	22/18862	0.00378944724686101	0.0466102011363904	0.03760437124397	7114	2	TMSB4X	GC1
GO:0002479	antigen processing and presentation of exogenous peptide antigen via MHC class I, TAP-dependent	1979-03-01	75/18862	0.00384487421338548	0.0468658991955905	0.0378106643838856	5693	3	PSMB5	GC1
GO:0002479	antigen processing and presentation of exogenous peptide antigen via MHC class I, TAP-dependent	1979-03-01	75/18862	0.00384487421338548	0.0468658991955905	0.0378106643838856	5685	3	PSMA4	GC1
GO:0002479	antigen processing and presentation of exogenous peptide antigen via MHC class I, TAP-dependent	1979-03-01	75/18862	0.00384487421338548	0.0468658991955905	0.0378106643838856	5695	3	PSMB7	GC1
GO:0009615	response to virus	1979-06-01	359/18862	0.00394687647565499	0.0471304207581939	0.038024076186445	684	6	BST2	GC1
GO:0009615	response to virus	1979-06-01	359/18862	0.00394687647565499	0.0471304207581939	0.038024076186445	59	6	ACTA2	GC1
GO:0009615	response to virus	1979-06-01	359/18862	0.00394687647565499	0.0471304207581939	0.038024076186445	2023	6	ENO1	GC1
GO:0009615	response to virus	1979-06-01	359/18862	0.00394687647565499	0.0471304207581939	0.038024076186445	10625	6	IVNS1ABP	GC1
GO:0009615	response to virus	1979-06-01	359/18862	0.00394687647565499	0.0471304207581939	0.038024076186445	7105	6	TSPAN6	GC1
GO:0009615	response to virus	1979-06-01	359/18862	0.00394687647565499	0.0471304207581939	0.038024076186445	3429	6	IFI27	GC1
GO:0036293	response to decreased oxygen levels	1979-06-01	360/18862	0.00400061236864822	0.0471304207581939	0.038024076186445	5693	6	PSMB5	GC1
GO:0036293	response to decreased oxygen levels	1979-06-01	360/18862	0.00400061236864822	0.0471304207581939	0.038024076186445	5685	6	PSMA4	GC1
GO:0036293	response to decreased oxygen levels	1979-06-01	360/18862	0.00400061236864822	0.0471304207581939	0.038024076186445	2023	6	ENO1	GC1
GO:0036293	response to decreased oxygen levels	1979-06-01	360/18862	0.00400061236864822	0.0471304207581939	0.038024076186445	139341	6	FUNDC1	GC1
GO:0036293	response to decreased oxygen levels	1979-06-01	360/18862	0.00400061236864822	0.0471304207581939	0.038024076186445	9978	6	RBX1	GC1
GO:0036293	response to decreased oxygen levels	1979-06-01	360/18862	0.00400061236864822	0.0471304207581939	0.038024076186445	5695	6	PSMB7	GC1
GO:0002429	immune response-activating cell surface receptor signaling pathway	1979-07-01	481/18862	0.00400591159437716	0.0471304207581939	0.038024076186445	3514	7	IGKC	GC1
GO:0002429	immune response-activating cell surface receptor signaling pathway	1979-07-01	481/18862	0.00400591159437716	0.0471304207581939	0.038024076186445	5693	7	PSMB5	GC1
GO:0002429	immune response-activating cell surface receptor signaling pathway	1979-07-01	481/18862	0.00400591159437716	0.0471304207581939	0.038024076186445	5685	7	PSMA4	GC1
GO:0002429	immune response-activating cell surface receptor signaling pathway	1979-07-01	481/18862	0.00400591159437716	0.0471304207581939	0.038024076186445	3127	7	HLA-DRB5	GC1
GO:0002429	immune response-activating cell surface receptor signaling pathway	1979-07-01	481/18862	0.00400591159437716	0.0471304207581939	0.038024076186445	10094	7	ARPC3	GC1
GO:0002429	immune response-activating cell surface receptor signaling pathway	1979-07-01	481/18862	0.00400591159437716	0.0471304207581939	0.038024076186445	5695	7	PSMB7	GC1
GO:0002429	immune response-activating cell surface receptor signaling pathway	1979-07-01	481/18862	0.00400591159437716	0.0471304207581939	0.038024076186445	6500	7	SKP1	GC1
GO:0002757	immune response-activating signal transduction	1979-07-01	481/18862	0.00400591159437716	0.0471304207581939	0.038024076186445	3514	7	IGKC	GC1
GO:0002757	immune response-activating signal transduction	1979-07-01	481/18862	0.00400591159437716	0.0471304207581939	0.038024076186445	5693	7	PSMB5	GC1
GO:0002757	immune response-activating signal transduction	1979-07-01	481/18862	0.00400591159437716	0.0471304207581939	0.038024076186445	5685	7	PSMA4	GC1
GO:0002757	immune response-activating signal transduction	1979-07-01	481/18862	0.00400591159437716	0.0471304207581939	0.038024076186445	3127	7	HLA-DRB5	GC1
GO:0002757	immune response-activating signal transduction	1979-07-01	481/18862	0.00400591159437716	0.0471304207581939	0.038024076186445	10094	7	ARPC3	GC1
GO:0002757	immune response-activating signal transduction	1979-07-01	481/18862	0.00400591159437716	0.0471304207581939	0.038024076186445	5695	7	PSMB7	GC1
GO:0002757	immune response-activating signal transduction	1979-07-01	481/18862	0.00400591159437716	0.0471304207581939	0.038024076186445	6500	7	SKP1	GC1
GO:0043687	post-translational protein modification	1979-06-01	361/18862	0.00405489010305531	0.0472953992192572	0.0381571781929978	5693	6	PSMB5	GC1
GO:0043687	post-translational protein modification	1979-06-01	361/18862	0.00405489010305531	0.0472953992192572	0.0381571781929978	5685	6	PSMA4	GC1
GO:0043687	post-translational protein modification	1979-06-01	361/18862	0.00405489010305531	0.0472953992192572	0.0381571781929978	1462	6	VCAN	GC1
GO:0043687	post-translational protein modification	1979-06-01	361/18862	0.00405489010305531	0.0472953992192572	0.0381571781929978	9978	6	RBX1	GC1
GO:0043687	post-translational protein modification	1979-06-01	361/18862	0.00405489010305531	0.0472953992192572	0.0381571781929978	5695	6	PSMB7	GC1
GO:0043687	post-translational protein modification	1979-06-01	361/18862	0.00405489010305531	0.0472953992192572	0.0381571781929978	6500	6	SKP1	GC1
GO:0033238	regulation of cellular amine metabolic process	1979-03-01	77/18862	0.00414032417800491	0.0478791334430825	0.0386281257093216	5693	3	PSMB5	GC1
GO:0033238	regulation of cellular amine metabolic process	1979-03-01	77/18862	0.00414032417800491	0.0478791334430825	0.0386281257093216	5685	3	PSMA4	GC1
GO:0033238	regulation of cellular amine metabolic process	1979-03-01	77/18862	0.00414032417800491	0.0478791334430825	0.0386281257093216	5695	3	PSMB7	GC1
GO:0042180	cellular ketone metabolic process	1979-05-01	254/18862	0.00426948094001808	0.0489543026427496	0.0394955551721565	2170	5	FABP3	GC1
GO:0042180	cellular ketone metabolic process	1979-05-01	254/18862	0.00426948094001808	0.0489543026427496	0.0394955551721565	5693	5	PSMB5	GC1
GO:0042180	cellular ketone metabolic process	1979-05-01	254/18862	0.00426948094001808	0.0489543026427496	0.0394955551721565	7167	5	TPI1	GC1
GO:0042180	cellular ketone metabolic process	1979-05-01	254/18862	0.00426948094001808	0.0489543026427496	0.0394955551721565	5685	5	PSMA4	GC1
GO:0042180	cellular ketone metabolic process	1979-05-01	254/18862	0.00426948094001808	0.0489543026427496	0.0394955551721565	5695	5	PSMB7	GC1
GO:1902275	regulation of chromatin organization	1937-05-01	185/18862	2.9053609468249e-05	0.0374210489951046	0.0292676886959097	9874	5	TLK1	GC2
GO:1902275	regulation of chromatin organization	1937-05-01	185/18862	2.9053609468249e-05	0.0374210489951046	0.0292676886959097	6418	5	SET	GC2
GO:1902275	regulation of chromatin organization	1937-05-01	185/18862	2.9053609468249e-05	0.0374210489951046	0.0292676886959097	26036	5	ZNF451	GC2
GO:1902275	regulation of chromatin organization	1937-05-01	185/18862	2.9053609468249e-05	0.0374210489951046	0.0292676886959097	1499	5	CTNNB1	GC2
GO:1902275	regulation of chromatin organization	1937-05-01	185/18862	2.9053609468249e-05	0.0374210489951046	0.0292676886959097	4300	5	MLLT3	GC2
