# Supplementary material for: Single-Cell Transcriptomics Analysis of Human Small Antral Follicles
Source: Int J Mol Sci. 2021 Nov 4;22(21):11955. doi: 10.3390/ijms222111955 (PMC8584910; doi:10.3390/ijms222111955)
Supplement: Supplementary file 1 [file ijms-22-11955-s001.zip › Table S4. cellphoneDB.mean.filtered.xlsx]

## Sheet: cellphoneDB.mean.filtered
id_cp_interaction	interacting_pair	partner_a	partner_b	gene_a	gene_b	secreted	receptor_a	receptor_b	annotation_strategy	is_integrin	GV/MI|md.GC	md.GC|GV/MI	GO|ld.GC	ld.GC|GO	GO|md.GC	md.GC|GO
CPI-SS044DF8749	KLRG2_WNT5B	simple:A4D1S0	simple:Q9H1J7	ENSG00000188883	ENSG00000111186	TRUE	TRUE	FALSE	InnateDB-All	FALSE	0	0	0.122	0.068	NA	NA
CPI-SS0F8ABC300	GALR2_GAL	simple:O43603	simple:P22466	ENSG00000182687	ENSG00000069482	TRUE	TRUE	FALSE	guidetopharmacology.org	FALSE	0	0.708	NA	NA	NA	NA
CPI-SS0B84DAE3D	PVR_CD96	simple:P15151	simple:P40200	ENSG00000073008	ENSG00000153283	TRUE	TRUE	TRUE	curated	FALSE	1272	0	0.075	0.051	0	0.542
CPI-SS0A8627ED6	PVR_CD226	simple:P15151	simple:Q15762	ENSG00000073008	ENSG00000150637	TRUE	TRUE	TRUE	curated	FALSE	1337	0.417	1008	0.225	0.439	0
CPI-SS00561BBD7	PVR_TIGIT	simple:P15151	simple:Q495A1	ENSG00000073008	ENSG00000181847	TRUE	TRUE	FALSE	curated	FALSE	0	1714	0.146	0.441	0.5	0.133
CPI-SS0F1A060D4	PVR_NECTIN3	simple:P15151	simple:Q9NQS3	ENSG00000073008	ENSG00000177707	TRUE	TRUE	FALSE	curated	FALSE	1749	1727	0	0.398	0.596	1.48
CPI-SS0B990492C	CADM1_NECTIN3	simple:Q9BY67	simple:Q9NQS3	ENSG00000182985	ENSG00000177707	FALSE	FALSE	FALSE	curated	FALSE	2519	1918	1.27	0	0.787	1818
CPI-SS0C5E9FBFB	NECTIN1_NECTIN3	simple:Q15223	simple:Q9NQS3	ENSG00000110400	ENSG00000177707	TRUE	TRUE	FALSE	curated	FALSE	1.6	2794	1427	0.5	1659	2585
CPI-SS03859E16F	TIGIT_NECTIN3	simple:Q495A1	simple:Q9NQS3	ENSG00000181847	ENSG00000177707	FALSE	FALSE	FALSE	curated	FALSE	2062	0	1205	0.666	0.992	2945
CPI-SS02FBD007E	NECTIN2_NECTIN3	simple:Q92692	simple:Q9NQS3	ENSG00000130202	ENSG00000177707	FALSE	TRUE	FALSE	curated	FALSE	0.763	1981	1213	2.01	1865	2011
CPI-SS0889E281D	CADM1_CADM1	simple:Q9BY67	simple:Q9BY67	ENSG00000182985	ENSG00000182985	FALSE	FALSE	FALSE	curated	FALSE	2361	2361	0	1891	0	2.36
CPI-SS01E0F2D2C	NECTIN1_NECTIN4	simple:Q15223	simple:Q96NY8	ENSG00000110400	ENSG00000143217	TRUE	TRUE	TRUE	curated	FALSE	1174	0	1826	2608	2042	2042
CPI-SS0A5DF05C0	TIGIT_NECTIN2	simple:Q495A1	simple:Q92692	ENSG00000181847	ENSG00000130202	FALSE	FALSE	TRUE	curated	FALSE	1968	0	1692	2372	0	1297
CPI-SS06207F70E	CD226_NECTIN2	simple:Q15762	simple:Q92692	ENSG00000150637	ENSG00000130202	FALSE	TRUE	TRUE	curated	FALSE	0.671	0.35	0.704	2.04	0.741	0
CPI-SC01C699B73	COL6A6_a10b1 complex	simple:A6NMZ7	complex:a10b1 complex	ENSG00000206384		TRUE	FALSE	FALSE	curated	TRUE	1728	1597	0	1993	2023	0
CPI-SC00A0B0892	COL6A5_a10b1 complex	simple:A8TX70	complex:a10b1 complex	ENSG00000172752		TRUE	FALSE	FALSE	curated	TRUE	1543	1592	0	0	0.675	0
CPI-SC07ECBFCA7	COL1A1_a10b1 complex	simple:P02452	complex:a10b1 complex	ENSG00000108821		TRUE	FALSE	FALSE	curated	TRUE	0.45	1769	0.032	0	0	1742
CPI-SC0DA298BEC	COL2A1_a10b1 complex	simple:P02458	complex:a10b1 complex	ENSG00000139219		TRUE	FALSE	FALSE	curated	TRUE	0	1643	0	1669	0	1355
CPI-SC067433F6B	COL3A1_a10b1 complex	simple:P02461	complex:a10b1 complex	ENSG00000168542		TRUE	FALSE	FALSE	curated	TRUE	0.334	1737	2387	2387	0	1455
CPI-SC0B6F1A278	COL4A1_a10b1 complex	simple:P02462	complex:a10b1 complex	ENSG00000187498		TRUE	FALSE	FALSE	curated	TRUE	1128	4019	0.84	1742	0	1843
CPI-SC0D19BAF15	FN1_a10b1 complex	simple:P02751	complex:a10b1 complex	ENSG00000115414		TRUE	FALSE	FALSE	curated	TRUE	3234	3588	0	0.287	0	1682
CPI-SC0F516B854	COL5A2_a10b1 complex	simple:P05997	complex:a10b1 complex	ENSG00000204262		TRUE	FALSE	FALSE	curated	TRUE	0.113	1875	0	0.348	0	2.9
CPI-SC011F01833	COL1A2_a10b1 complex	simple:P08123	complex:a10b1 complex	ENSG00000164692		TRUE	FALSE	FALSE	curated	TRUE	0.336	1684	1535	0	0	2382
CPI-SC0FA79E269	COL4A2_a10b1 complex	simple:P08572	complex:a10b1 complex	ENSG00000134871		TRUE	FALSE	FALSE	curated	TRUE	1241	2848	1559	0.637	0	1395
CPI-SC04936738A	COL11A1_a10b1 complex	simple:P12107	complex:a10b1 complex	ENSG00000060718		TRUE	FALSE	FALSE	curated	TRUE	0.585	1615	0.649	0	0	1954
CPI-SC02B111AB0	COL6A1_a10b1 complex	simple:P12109	complex:a10b1 complex	ENSG00000142156		TRUE	FALSE	FALSE	curated	TRUE	0.205	2207	0.484	0	0	2833
CPI-SC0CE851065	COL6A2_a10b1 complex	simple:P12110	complex:a10b1 complex	ENSG00000142173		TRUE	FALSE	FALSE	curated	TRUE	0	1803	1.87	1348	0	1378
CPI-SC07375C073	COL6A3_a10b1 complex	simple:P12111	complex:a10b1 complex	ENSG00000163359		TRUE	FALSE	FALSE	curated	TRUE	0.205	1937	0.988	1228	0	1836
CPI-SC0D6C777F2	COL11A2_a10b1 complex	simple:P13942	complex:a10b1 complex	ENSG00000235708		TRUE	FALSE	FALSE	curated	TRUE	0.187	1623	0.507	1984	0	1418
CPI-SC0F74C069F	COL9A1_a10b1 complex	simple:P20849	complex:a10b1 complex	ENSG00000112280		TRUE	FALSE	FALSE	curated	TRUE	0	1683	0.421	1587	0	1.5
CPI-SC041DEF0FB	COL5A1_a10b1 complex	simple:P20908	complex:a10b1 complex	ENSG00000130635		TRUE	FALSE	FALSE	curated	TRUE	0.965	1614	0	1525	0	1418
CPI-SC0C907A888	COL8A2_a10b1 complex	simple:P25067	complex:a10b1 complex	ENSG00000171812		TRUE	FALSE	FALSE	curated	TRUE	0	1602	0.503	2.05	0	1501
CPI-SC08B1D5269	COL5A3_a10b1 complex	simple:P25940	complex:a10b1 complex	ENSG00000080573		TRUE	FALSE	FALSE	curated	TRUE	0	1601	3154	1692	0	1.42
CPI-SC0F8101D41	COL8A1_a10b1 complex	simple:P27658	complex:a10b1 complex	ENSG00000144810		TRUE	FALSE	FALSE	curated	TRUE	0	1594	0	1265	0	1399
CPI-SC087556B01	COL4A5_a10b1 complex	simple:P29400	complex:a10b1 complex	ENSG00000188153		TRUE	FALSE	FALSE	curated	TRUE	0	1719	0.462	1448	0	1744
CPI-SC08E75294D	COL15A1_a10b1 complex	simple:P39059	complex:a10b1 complex	ENSG00000204291		TRUE	FALSE	FALSE	curated	TRUE	0.113	1613	0	1811	0	1.69
CPI-SC0017F527E	COL18A1_a10b1 complex	simple:P39060	complex:a10b1 complex	ENSG00000182871		TRUE	FALSE	FALSE	curated	TRUE	0	1574	0.425	1437	0	1716
CPI-SC00C0800EB	COL4A4_a10b1 complex	simple:P53420	complex:a10b1 complex	ENSG00000081052		TRUE	FALSE	FALSE	curated	TRUE	0.869	2186	0	1199	0	1568
CPI-SC0A3F146C2	COL4A3_a10b1 complex	simple:Q01955	complex:a10b1 complex	ENSG00000169031		TRUE	FALSE	FALSE	curated	TRUE	0.58	2206	0.46	1158	0	1398
CPI-SC008F4294F	COL7A1_a10b1 complex	simple:Q02388	complex:a10b1 complex	ENSG00000114270		TRUE	FALSE	FALSE	curated	TRUE	0	1753	0.899	1697	0	1.81
CPI-SC015980AEB	COL14A1_a10b1 complex	simple:Q05707	complex:a10b1 complex	ENSG00000187955		TRUE	FALSE	FALSE	curated	TRUE	0.282	0	0.6	1276	0	1977
CPI-SC0F94B2CF9	COL16A1_a10b1 complex	simple:Q07092	complex:a10b1 complex	ENSG00000084636		TRUE	FALSE	FALSE	curated	TRUE	0	1888	0.39	1197	0	1484
CPI-SC05565E8CE	COL4A6_a10b1 complex	simple:Q14031	complex:a10b1 complex	ENSG00000197565		TRUE	FALSE	FALSE	curated	TRUE	0.669	1648	0.825	1534	0	1459
CPI-SC0517A327B	COL9A3_a10b1 complex	simple:Q14050	complex:a10b1 complex	ENSG00000092758		TRUE	FALSE	FALSE	curated	TRUE	0.334	1584	0.407	1117	0	1.47
CPI-SC067EE23E1	COL9A2_a10b1 complex	simple:Q14055	complex:a10b1 complex	ENSG00000049089		TRUE	FALSE	FALSE	curated	TRUE	0	1601	0	1238	0	1367
CPI-SC09DFB2ACA	COL19A1_a10b1 complex	simple:Q14993	complex:a10b1 complex	ENSG00000082293		TRUE	FALSE	FALSE	curated	TRUE	0	1682	0	1125	0	1613
CPI-SC090311934	COL24A1_a10b1 complex	simple:Q17RW2	complex:a10b1 complex	ENSG00000171502		TRUE	FALSE	FALSE	curated	TRUE	0	1688	0	1179	0	1498
CPI-SC05D8C0EF5	COL28A1_a10b1 complex	simple:Q2UY09	complex:a10b1 complex	ENSG00000215018		TRUE	FALSE	FALSE	curated	TRUE	2872	1602	0.5	1568	0	1789
CPI-SC0725E3A76	COL13A1_a10b1 complex	simple:Q5TAT6	complex:a10b1 complex	ENSG00000197467		FALSE	FALSE	FALSE	curated	TRUE	0.154	1613	0.387	1167	0	1522
CPI-SC0C9CBDD21	COL27A1_a10b1 complex	simple:Q8IZC6	complex:a10b1 complex	ENSG00000196739		TRUE	FALSE	FALSE	curated	TRUE	0.113	1649	1.27	1523	0	1515
CPI-SC0BA1D5E00	COL22A1_a10b1 complex	simple:Q8NFW1	complex:a10b1 complex	ENSG00000169436		TRUE	FALSE	FALSE	curated	TRUE	1403	1663	0.405	1257	0	1528
CPI-SC0147A8A42	COL26A1_a10b1 complex	simple:Q96A83	complex:a10b1 complex	ENSG00000160963		TRUE	FALSE	FALSE	curated	TRUE	0	1602	0.493	1504	0	1438
CPI-SC02131C05A	COL12A1_a10b1 complex	simple:Q99715	complex:a10b1 complex	ENSG00000111799		TRUE	FALSE	FALSE	curated	TRUE	1528	1583	0	1226	0	1798
CPI-SC0BF16A11C	COL20A1_a10b1 complex	simple:Q9P218	complex:a10b1 complex	ENSG00000101203		TRUE	FALSE	FALSE	curated	TRUE	0	1594	0.868	1585	0	1303
CPI-SC06B4C6DD5	COL17A1_a10b1 complex	simple:Q9UMD9	complex:a10b1 complex	ENSG00000065618		TRUE	FALSE	FALSE	curated	TRUE	0	1.66	0.532	1476	0	1.48
CPI-SC07E0348EF	COL6A6_a11b1 complex	simple:A6NMZ7	complex:a11b1 complex	ENSG00000206384		TRUE	FALSE	FALSE	curated	TRUE	1735	0.802	0.972	1.28	0	1563
CPI-SC05CE52A12	COL6A5_a11b1 complex	simple:A8TX70	complex:a11b1 complex	ENSG00000172752		TRUE	FALSE	FALSE	curated	TRUE	1.55	0.797	0.457	1126	0	1413
CPI-SC0F7E26271	COL1A1_a11b1 complex	simple:P02452	complex:a11b1 complex	ENSG00000108821		TRUE	FALSE	FALSE	curated	TRUE	0.456	0.974	0.39	1156	0	1445
CPI-SC0CF621D48	COL2A1_a11b1 complex	simple:P02458	complex:a11b1 complex	ENSG00000139219		TRUE	FALSE	FALSE	curated	TRUE	0	0.848	0.405	1.59	0.765	0.882
CPI-SC0A8902C85	COL3A1_a11b1 complex	simple:P02461	complex:a11b1 complex	ENSG00000168542		TRUE	FALSE	FALSE	curated	TRUE	0.341	0.942	0.817	1472	1225	0.495
CPI-SC0A0532ADC	COL4A1_a11b1 complex	simple:P02462	complex:a11b1 complex	ENSG00000187498		TRUE	FALSE	FALSE	curated	TRUE	1134	3224	3297	1224	0	0.595
CPI-SC0CFF5E19D	FN1_a11b1 complex	simple:P02751	complex:a11b1 complex	ENSG00000115414		TRUE	FALSE	FALSE	curated	TRUE	3.24	2794	0.407	1222	0	0.983
CPI-SC0DF641DAA	COL5A2_a11b1 complex	simple:P05997	complex:a11b1 complex	ENSG00000204262		TRUE	FALSE	FALSE	curated	TRUE	0.12	1.08	0.45	1466	0.26	0.822
CPI-SC0681D30FE	COL1A2_a11b1 complex	simple:P08123	complex:a11b1 complex	ENSG00000164692		TRUE	FALSE	FALSE	curated	TRUE	0.343	0.889	0.873	1365	1017	2.04
CPI-SC02017BE74	COL4A2_a11b1 complex	simple:P08572	complex:a11b1 complex	ENSG00000134871		TRUE	FALSE	FALSE	curated	TRUE	1248	2053	0	1146	2725	1522
CPI-SC0861656EC	COL11A1_a11b1 complex	simple:P12107	complex:a11b1 complex	ENSG00000060718		TRUE	FALSE	FALSE	curated	TRUE	0.592	0.82	0	1404	0	0.535
CPI-SC04085F9F9	COL6A1_a11b1 complex	simple:P12109	complex:a11b1 complex	ENSG00000142156		TRUE	FALSE	FALSE	curated	TRUE	0.212	1412	1064	1483	0.122	1094
CPI-SC0A54B5323	COL6A2_a11b1 complex	simple:P12110	complex:a11b1 complex	ENSG00000142173		TRUE	FALSE	FALSE	curated	TRUE	0	1008	0.39	1235	0.414	1973
CPI-SC0ECFACED2	COL6A3_a11b1 complex	simple:P12111	complex:a11b1 complex	ENSG00000163359		TRUE	FALSE	FALSE	curated	TRUE	0.212	1142	0.437	1394	1043	0.518
CPI-SC0CA323AE3	COL11A2_a11b1 complex	simple:P13942	complex:a11b1 complex	ENSG00000235708		TRUE	FALSE	FALSE	curated	TRUE	0.194	0.829	1.93	0.89	0.26	0.976
CPI-SC0CBC30AB7	COL9A1_a11b1 complex	simple:P20849	complex:a11b1 complex	ENSG00000112280		TRUE	FALSE	FALSE	curated	TRUE	0	0.888	1048	0.77	0	0.558
CPI-SC0092846B0	COL5A1_a11b1 complex	simple:P20908	complex:a11b1 complex	ENSG00000130635		TRUE	FALSE	FALSE	curated	TRUE	0.972	0.819	0.568	1526	0	0.64
CPI-SC08AF9CA91	COL8A2_a11b1 complex	simple:P25067	complex:a11b1 complex	ENSG00000171812		TRUE	FALSE	FALSE	curated	TRUE	0	0.807	0.482	1129	0	0.558
CPI-SC07E958BDE	COL5A3_a11b1 complex	simple:P25940	complex:a11b1 complex	ENSG00000080573		TRUE	FALSE	FALSE	curated	TRUE	0	0.806	0	1067	0.16	0.641
CPI-SC08CC68F11	COL8A1_a11b1 complex	simple:P27658	complex:a11b1 complex	ENSG00000144810		TRUE	FALSE	FALSE	curated	TRUE	0	0.799	0.564	1592	0.367	0.56
CPI-SC0CE433AB8	COL4A5_a11b1 complex	simple:P29400	complex:a11b1 complex	ENSG00000188153		TRUE	FALSE	FALSE	curated	TRUE	0	0.924	3215	1234	0	0.539
CPI-SC03BFF1D95	COL15A1_a11b1 complex	simple:P39059	complex:a11b1 complex	ENSG00000204291		TRUE	FALSE	FALSE	curated	TRUE	0.12	0.818	0	0.807	0	0.884
CPI-SC03ADD2063	COL18A1_a11b1 complex	simple:P39060	complex:a11b1 complex	ENSG00000182871		TRUE	FALSE	FALSE	curated	TRUE	0	0.779	0.522	0.99	0	0.83
CPI-SC0082A7233	COL4A4_a11b1 complex	simple:P53420	complex:a11b1 complex	ENSG00000081052		TRUE	FALSE	FALSE	curated	TRUE	0.876	1391	0	1353	0	0.856
CPI-SC0674C647E	COL4A3_a11b1 complex	simple:Q01955	complex:a11b1 complex	ENSG00000169031		TRUE	FALSE	FALSE	curated	TRUE	0.587	1411	0.485	0.979	0.435	0.708
CPI-SC03D71E025	COL7A1_a11b1 complex	simple:Q02388	complex:a11b1 complex	ENSG00000114270		TRUE	FALSE	FALSE	curated	TRUE	0	0.958	0	0.741	0.16	0.538
CPI-SC060984F83	COL14A1_a11b1 complex	simple:Q05707	complex:a11b1 complex	ENSG00000187955		TRUE	FALSE	FALSE	curated	TRUE	0.288	0	0.521	0.7	0.316	0.95
CPI-SC0014D5A6E	COL16A1_a11b1 complex	simple:Q07092	complex:a11b1 complex	ENSG00000084636		TRUE	FALSE	FALSE	curated	TRUE	0	1093	0.96	1.24	0.16	1117
CPI-SC0B066E03C	COL4A6_a11b1 complex	simple:Q14031	complex:a11b1 complex	ENSG00000197565		TRUE	FALSE	FALSE	curated	TRUE	0.676	0.853	0.661	0.818	0.26	0.624
CPI-SC0B4BD965C	COL9A3_a11b1 complex	simple:Q14050	complex:a11b1 complex	ENSG00000092758		TRUE	FALSE	FALSE	curated	TRUE	0.341	0.789	0.45	0.739	0.26	0.599
CPI-SC0247E9ADB	COL9A2_a11b1 complex	simple:Q14055	complex:a11b1 complex	ENSG00000049089		TRUE	FALSE	FALSE	curated	TRUE	0	0.806	0.885	1076	0	0.61
CPI-SC0035F0B0F	COL19A1_a11b1 complex	simple:Q14993	complex:a11b1 complex	ENSG00000082293		TRUE	FALSE	FALSE	curated	TRUE	0	0.887	0.467	0.66	0.775	0.507
CPI-SC06ACCFA52	COL24A1_a11b1 complex	simple:Q17RW2	complex:a11b1 complex	ENSG00000171502		TRUE	FALSE	FALSE	curated	TRUE	0	0.893	0	0.78	0.122	0.753
CPI-SC069F9E62C	COL28A1_a11b1 complex	simple:Q2UY09	complex:a11b1 complex	ENSG00000215018		TRUE	FALSE	FALSE	curated	TRUE	2879	0.807	0	0.667	0.16	0.637
CPI-SC0D2BDC009	COL13A1_a11b1 complex	simple:Q5TAT6	complex:a11b1 complex	ENSG00000197467		FALSE	FALSE	FALSE	curated	TRUE	0.161	0.818	0	0.722	0.195	0.929
CPI-SC05F111D21	COL27A1_a11b1 complex	simple:Q8IZC6	complex:a11b1 complex	ENSG00000196739		TRUE	FALSE	FALSE	curated	TRUE	0.12	0.854	0.56	1.11	0	0.662
CPI-SC0BCD683D4	COL22A1_a11b1 complex	simple:Q8NFW1	complex:a11b1 complex	ENSG00000169436		TRUE	FALSE	FALSE	curated	TRUE	1409	0.868	0.447	0.709	3272	0.655
CPI-SC041215790	COL26A1_a11b1 complex	simple:Q96A83	complex:a11b1 complex	ENSG00000160963		TRUE	FALSE	FALSE	curated	TRUE	0	0.807	1.33	1065	0	0.668
CPI-SC05B2AA866	COL12A1_a11b1 complex	simple:Q99715	complex:a11b1 complex	ENSG00000111799		TRUE	FALSE	FALSE	curated	TRUE	1534	0.788	0.466	0.799	0	0.577
CPI-SC051B1E9C4	COL20A1_a11b1 complex	simple:Q9P218	complex:a11b1 complex	ENSG00000101203		TRUE	FALSE	FALSE	curated	TRUE	0	0.799	0.553	1046	0.707	0.938
CPI-SC0247375A7	COL17A1_a11b1 complex	simple:Q9UMD9	complex:a11b1 complex	ENSG00000065618		TRUE	FALSE	FALSE	curated	TRUE	0	0.865	0	0.768	0	0.443
CPI-SC0B808E56A	COL6A6_a1b1 complex	simple:A6NMZ7	complex:a1b1 complex	ENSG00000206384		TRUE	FALSE	FALSE	curated	TRUE	1885	0	0.929	1128	0	0.62
CPI-SC089D4762F	COL6A5_a1b1 complex	simple:A8TX70	complex:a1b1 complex	ENSG00000172752		TRUE	FALSE	FALSE	curated	TRUE	1.7	0	0.592	1019	1444	0.703
CPI-SC0F73E9099	COL1A1_a1b1 complex	simple:P02452	complex:a1b1 complex	ENSG00000108821		TRUE	FALSE	FALSE	curated	TRUE	0.606	0	1033	0.822	0	0.553
CPI-SC016235D3A	COL2A1_a1b1 complex	simple:P02458	complex:a1b1 complex	ENSG00000139219		TRUE	FALSE	FALSE	curated	TRUE	0	0	0.517	0.668	0.228	0.585
CPI-SC0BC63F8C0	COL3A1_a1b1 complex	simple:P02461	complex:a1b1 complex	ENSG00000168542		TRUE	FALSE	FALSE	curated	TRUE	0.491	0	0.45	0.699	1041	0.547
CPI-SC0672FBD31	COL4A1_a1b1 complex	simple:P02462	complex:a1b1 complex	ENSG00000187498		TRUE	FALSE	FALSE	curated	TRUE	1284	0	0.466	1132	1502	0.16
CPI-SC0545E2502	COL5A2_a1b1 complex	simple:P05997	complex:a1b1 complex	ENSG00000204262		TRUE	FALSE	FALSE	curated	TRUE	0.27	0	0.877	1014	0	0.26
CPI-SC006E22794	COL1A2_a1b1 complex	simple:P08123	complex:a1b1 complex	ENSG00000164692		TRUE	FALSE	FALSE	curated	TRUE	0.493	0	3357	0.767	0	0.647
CPI-SC0458F68A5	COL4A2_a1b1 complex	simple:P08572	complex:a1b1 complex	ENSG00000134871		TRUE	FALSE	FALSE	curated	TRUE	1398	0	0.467	0.765	0.536	0.487
CPI-SC06E5E0C83	COL11A1_a1b1 complex	simple:P12107	complex:a1b1 complex	ENSG00000060718		TRUE	FALSE	FALSE	curated	TRUE	0.742	0	0.51	1008	1294	1705
CPI-SC09FDA4F45	COL6A1_a1b1 complex	simple:P12109	complex:a1b1 complex	ENSG00000142156		TRUE	FALSE	FALSE	curated	TRUE	0.362	0	0.933	0.907	0	0.2
CPI-SC0F4BC2909	COL6A2_a1b1 complex	simple:P12110	complex:a1b1 complex	ENSG00000142173		TRUE	FALSE	FALSE	curated	TRUE	0	0	0	0.688	0.398	0.759
CPI-SC02AE206BE	COL6A3_a1b1 complex	simple:P12111	complex:a1b1 complex	ENSG00000163359		TRUE	FALSE	FALSE	curated	TRUE	0.362	0	0	0.946	0.69	1637
CPI-SC0A8E69BC5	COL11A2_a1b1 complex	simple:P13942	complex:a1b1 complex	ENSG00000235708		TRUE	FALSE	FALSE	curated	TRUE	0.344	0	1125	1025	1.32	0.183
CPI-SC05B6D413B	COL9A1_a1b1 complex	simple:P20849	complex:a1b1 complex	ENSG00000112280		TRUE	FALSE	FALSE	curated	TRUE	0	0	0.45	0.778	0.536	0.64
CPI-SC05992FDC8	COL5A1_a1b1 complex	simple:P20908	complex:a1b1 complex	ENSG00000130635		TRUE	FALSE	FALSE	curated	TRUE	1122	0	0.497	0.936	0	0.222
CPI-SC069F95780	COL8A2_a1b1 complex	simple:P25067	complex:a1b1 complex	ENSG00000171812		TRUE	FALSE	FALSE	curated	TRUE	0	0	1953	0.421	0	0.305
CPI-SC0DAD29856	COL5A3_a1b1 complex	simple:P25940	complex:a1b1 complex	ENSG00000080573		TRUE	FALSE	FALSE	curated	TRUE	0	0	1071	0.301	0	0.223
CPI-SC02F06FF62	COL8A1_a1b1 complex	simple:P27658	complex:a1b1 complex	ENSG00000144810		TRUE	FALSE	FALSE	curated	TRUE	0	0	0.59	1057	0.436	0.306
CPI-SC0EC572716	COL4A5_a1b1 complex	simple:P29400	complex:a1b1 complex	ENSG00000188153		TRUE	FALSE	FALSE	curated	TRUE	0	0	0.504	0.66	0.644	0.225
CPI-SC0F8D27FBC	COL15A1_a1b1 complex	simple:P39059	complex:a1b1 complex	ENSG00000204291		TRUE	FALSE	FALSE	curated	TRUE	0.27	0	0	0.598	0	0.204
CPI-SC0EA3FC100	COL18A1_a1b1 complex	simple:P39060	complex:a1b1 complex	ENSG00000182871		TRUE	FALSE	FALSE	curated	TRUE	0	0	0.586	1123	0	0.549
CPI-SC091173D82	COL4A4_a1b1 complex	simple:P53420	complex:a1b1 complex	ENSG00000081052		TRUE	FALSE	FALSE	curated	TRUE	1026	0	0	0.338	0	0.495
CPI-SC07FB88720	COL4A3_a1b1 complex	simple:Q01955	complex:a1b1 complex	ENSG00000169031		TRUE	FALSE	FALSE	curated	TRUE	0.737	0	0.545	0.521	0	0.521
CPI-SC035953E6B	COL7A1_a1b1 complex	simple:Q02388	complex:a1b1 complex	ENSG00000114270		TRUE	FALSE	FALSE	curated	TRUE	0	0	0	0.884	0.712	0.373
CPI-SC0BD4C290F	COL14A1_a1b1 complex	simple:Q05707	complex:a1b1 complex	ENSG00000187955		TRUE	FALSE	FALSE	curated	TRUE	0.438	0	0.507	0.51	0.436	0.202
CPI-SC053BBE2B1	COL16A1_a1b1 complex	simple:Q07092	complex:a1b1 complex	ENSG00000084636		TRUE	FALSE	FALSE	curated	TRUE	0	0	0	0.272	0.593	0.614
CPI-SC0DA5EFA18	COL4A6_a1b1 complex	simple:Q14031	complex:a1b1 complex	ENSG00000197565		TRUE	FALSE	FALSE	curated	TRUE	0.826	0	0.543	0.231	0.436	0.782
CPI-SC0F778DC8E	COL9A3_a1b1 complex	simple:Q14050	complex:a1b1 complex	ENSG00000092758		TRUE	FALSE	FALSE	curated	TRUE	0.491	0	0.982	0.77	0.536	0.289
CPI-SC0F590482E	COL9A2_a1b1 complex	simple:Q14055	complex:a1b1 complex	ENSG00000049089		TRUE	FALSE	FALSE	curated	TRUE	0	0	0.683	0.349	0.536	0.264
CPI-SC0BA41B0D3	COL19A1_a1b1 complex	simple:Q14993	complex:a1b1 complex	ENSG00000082293		TRUE	FALSE	FALSE	curated	TRUE	0	0	0.473	0.27	0	0.275
CPI-SC090DB3159	COL24A1_a1b1 complex	simple:Q17RW2	complex:a1b1 complex	ENSG00000171502		TRUE	FALSE	FALSE	curated	TRUE	0	0	0.908	0.607	1052	0.172
CPI-SC0FF018913	COL28A1_a1b1 complex	simple:Q2UY09	complex:a1b1 complex	ENSG00000215018		TRUE	FALSE	FALSE	curated	TRUE	3029	0	0.49	0.19	0.398	0.417
CPI-SC08BF895FC	COL13A1_a1b1 complex	simple:Q5TAT6	complex:a1b1 complex	ENSG00000197467		FALSE	FALSE	FALSE	curated	TRUE	0.311	0	0	0.311	0.436	0.302
CPI-SC0D7F33CFB	COL27A1_a1b1 complex	simple:Q8IZC6	complex:a1b1 complex	ENSG00000196739		TRUE	FALSE	FALSE	curated	TRUE	0.27	0	0	0.198	0.472	0.593
CPI-SC040B3EFBC	COL22A1_a1b1 complex	simple:Q8NFW1	complex:a1b1 complex	ENSG00000169436		TRUE	FALSE	FALSE	curated	TRUE	1559	0	0	0.252	0	0.326
CPI-SC0EACF2D60	COL26A1_a1b1 complex	simple:Q96A83	complex:a1b1 complex	ENSG00000160963		TRUE	FALSE	FALSE	curated	TRUE	0	0	0.583	0.641	3548	0.32
CPI-SC004A436C5	COL12A1_a1b1 complex	simple:Q99715	complex:a1b1 complex	ENSG00000111799		TRUE	FALSE	FALSE	curated	TRUE	1684	0	0.47	0.24	0	0.333
CPI-SC00BE2EEE3	COL20A1_a1b1 complex	simple:Q9P218	complex:a1b1 complex	ENSG00000101203		TRUE	FALSE	FALSE	curated	TRUE	0	0	1352	0.596	0	0.242
CPI-SC08AA91C84	COL17A1_a1b1 complex	simple:Q9UMD9	complex:a1b1 complex	ENSG00000065618		TRUE	FALSE	FALSE	curated	TRUE	0	0	0.488	0.33	0.983	0.602
CPI-SC05D87F723	COL6A6_a2b1 complex	simple:A6NMZ7	complex:a2b1 complex	ENSG00000206384		TRUE	FALSE	FALSE	curated	TRUE	1.92	0.308	0.576	0.577	0	0.107
CPI-SC0606C6896	COL6A5_a2b1 complex	simple:A8TX70	complex:a2b1 complex	ENSG00000172752		TRUE	FALSE	FALSE	curated	TRUE	1735	0.302	0	0.299	0	0.285
CPI-SC01EA4FF6B	COL1A1_a2b1 complex	simple:P02452	complex:a2b1 complex	ENSG00000108821		TRUE	FALSE	FALSE	curated	TRUE	0.642	0.48	0.951	0.658	1721	0.367
CPI-SC036D78A43	COL2A1_a2b1 complex	simple:P02458	complex:a2b1 complex	ENSG00000139219		TRUE	FALSE	FALSE	curated	TRUE	0	0.354	0.614	0.549	0	0.218
CPI-SC054484F7B	COL3A1_a2b1 complex	simple:P02461	complex:a2b1 complex	ENSG00000168542		TRUE	FALSE	FALSE	curated	TRUE	0.526	0.448	1055	0.353	0.505	0.25
CPI-SC02392F4AF	COL4A1_a2b1 complex	simple:P02462	complex:a2b1 complex	ENSG00000187498		TRUE	FALSE	FALSE	curated	TRUE	1.32	2.73	0.54	0.199	1338	0.704
CPI-SC01FFC9392	FN1_a2b1 complex	simple:P02751	complex:a2b1 complex	ENSG00000115414		TRUE	FALSE	FALSE	curated	TRUE	3426	2299	0.473	0.23	1799	0.316
CPI-SC0CA7B34A5	COL5A2_a2b1 complex	simple:P05997	complex:a2b1 complex	ENSG00000204262		TRUE	FALSE	FALSE	curated	TRUE	0.305	0.586	0.488	0.663	0	0.416
CPI-SC05CCF815E	COL1A2_a2b1 complex	simple:P08123	complex:a2b1 complex	ENSG00000164692		TRUE	FALSE	FALSE	curated	TRUE	0.529	0.395	0.9	0.545	0	0.804
CPI-SC07222A428	COL4A2_a2b1 complex	simple:P08572	complex:a2b1 complex	ENSG00000134871		TRUE	FALSE	FALSE	curated	TRUE	1433	1558	3.38	0.298	0.833	0.643
CPI-SC0FBFA176B	COL11A1_a2b1 complex	simple:P12107	complex:a2b1 complex	ENSG00000060718		TRUE	FALSE	FALSE	curated	TRUE	0.778	0.325	0.49	0.295	1591	1861
CPI-SC08D8A859F	COL6A1_a2b1 complex	simple:P12109	complex:a2b1 complex	ENSG00000142156		TRUE	FALSE	FALSE	curated	TRUE	0.397	0.917	0.533	0.539	3298	1343
CPI-SC0814068D9	COL6A2_a2b1 complex	simple:P12110	complex:a2b1 complex	ENSG00000142173		TRUE	FALSE	FALSE	curated	TRUE	0	0.514	0.956	0.438	0	0.356
CPI-SC0D870AE49	COL6A3_a2b1 complex	simple:P12111	complex:a2b1 complex	ENSG00000163359		TRUE	FALSE	FALSE	curated	TRUE	0.397	0.648	0	0.219	0.695	0.915
CPI-SC0E4E54E13	COL11A2_a2b1 complex	simple:P13942	complex:a2b1 complex	ENSG00000235708		TRUE	FALSE	FALSE	curated	TRUE	0.379	0.334	0	0.477	0.987	1794
CPI-SC08F797F90	COL9A1_a2b1 complex	simple:P20849	complex:a2b1 complex	ENSG00000112280		TRUE	FALSE	FALSE	curated	TRUE	0	0.394	1147	0.556	1616	0.339
CPI-SC035134F18	COL5A1_a2b1 complex	simple:P20908	complex:a2b1 complex	ENSG00000130635		TRUE	FALSE	FALSE	curated	TRUE	1158	0.325	0.473	0.309	0.833	0.797
CPI-SC04B354AE3	COL8A2_a2b1 complex	simple:P25067	complex:a2b1 complex	ENSG00000171812		TRUE	FALSE	FALSE	curated	TRUE	0	0.313	0.52	0.467	0	0.379
CPI-SC0FC645961	COL5A3_a2b1 complex	simple:P25940	complex:a2b1 complex	ENSG00000080573		TRUE	FALSE	FALSE	curated	TRUE	0	0.312	1941	0	0	0.461
CPI-SC058845C44	COL8A1_a2b1 complex	simple:P27658	complex:a2b1 complex	ENSG00000144810		TRUE	FALSE	FALSE	curated	TRUE	0	0.305	1059	0	0	0.379
CPI-SC09C0B5D08	COL4A5_a2b1 complex	simple:P29400	complex:a2b1 complex	ENSG00000188153		TRUE	FALSE	FALSE	curated	TRUE	0	0.43	0.579	0	0.733	0.462
CPI-SC039D075C6	COL15A1_a2b1 complex	simple:P39059	complex:a2b1 complex	ENSG00000204291		TRUE	FALSE	FALSE	curated	TRUE	0.305	0.324	0.493	0	0.941	0.381
CPI-SC04B0064C4	COL18A1_a2b1 complex	simple:P39060	complex:a2b1 complex	ENSG00000182871		TRUE	FALSE	FALSE	curated	TRUE	0	0.284	0	0	0	0.36
CPI-SC03DD752AB	COL4A4_a2b1 complex	simple:P53420	complex:a2b1 complex	ENSG00000081052		TRUE	FALSE	FALSE	curated	TRUE	1061	0.897	0.575	0	0	0.705
CPI-SC052A417CB	COL4A3_a2b1 complex	simple:Q01955	complex:a2b1 complex	ENSG00000169031		TRUE	FALSE	FALSE	curated	TRUE	0.772	0.917	3226	0	0	0.652
CPI-SC08A98E7D4	COL7A1_a2b1 complex	simple:Q02388	complex:a2b1 complex	ENSG00000114270		TRUE	FALSE	FALSE	curated	TRUE	0	0.464	0	0	0	0.678
CPI-SC0E0C50FCA	COL14A1_a2b1 complex	simple:Q05707	complex:a2b1 complex	ENSG00000187955		TRUE	FALSE	FALSE	curated	TRUE	0.474	0	0.533	0	1009	0.529
CPI-SC01E9FAC20	COL16A1_a2b1 complex	simple:Q07092	complex:a2b1 complex	ENSG00000084636		TRUE	FALSE	FALSE	curated	TRUE	0	0.598	0	0	0.733	0.359
CPI-SC061137A41	COL4A6_a2b1 complex	simple:Q14031	complex:a2b1 complex	ENSG00000197565		TRUE	FALSE	FALSE	curated	TRUE	0.861	0.359	0.496	0	0.89	0.771
CPI-SC01F1F24AA	COL9A3_a2b1 complex	simple:Q14050	complex:a2b1 complex	ENSG00000092758		TRUE	FALSE	FALSE	curated	TRUE	0.526	0.295	0	0	0.733	0.938
CPI-SC08226CD3B	COL9A2_a2b1 complex	simple:Q14055	complex:a2b1 complex	ENSG00000049089		TRUE	FALSE	FALSE	curated	TRUE	0	0.312	0.532	0	0.833	0.445
CPI-SC0ADD7BEF0	COL19A1_a2b1 complex	simple:Q14993	complex:a2b1 complex	ENSG00000082293		TRUE	FALSE	FALSE	curated	TRUE	0	0.393	0.971	0	0.833	0.42
CPI-SC0EB600CAC	COL24A1_a2b1 complex	simple:Q17RW2	complex:a2b1 complex	ENSG00000171502		TRUE	FALSE	FALSE	curated	TRUE	0	0.399	0.672	0	0	0.431
CPI-SC083EDDA21	COL28A1_a2b1 complex	simple:Q2UY09	complex:a2b1 complex	ENSG00000215018		TRUE	FALSE	FALSE	curated	TRUE	3065	0.313	0.461	0	1349	0.328
CPI-SC0CCF30377	COL13A1_a2b1 complex	simple:Q5TAT6	complex:a2b1 complex	ENSG00000197467		FALSE	FALSE	FALSE	curated	TRUE	0.346	0.324	0.896	0	0.695	0.574
CPI-SC0CE6F5084	COL27A1_a2b1 complex	simple:Q8IZC6	complex:a2b1 complex	ENSG00000196739		TRUE	FALSE	FALSE	curated	TRUE	0.305	0.36	0.478	0	0.733	0.459
CPI-SC09DE07794	COL22A1_a2b1 complex	simple:Q8NFW1	complex:a2b1 complex	ENSG00000169436		TRUE	FALSE	FALSE	curated	TRUE	1595	0.374	0	0	0.769	0.75
CPI-SC0AD6D8724	COL26A1_a2b1 complex	simple:Q96A83	complex:a2b1 complex	ENSG00000160963		TRUE	FALSE	FALSE	curated	TRUE	0	0.313	0	0	0	0.483
CPI-SC0F300DE24	COL12A1_a2b1 complex	simple:Q99715	complex:a2b1 complex	ENSG00000111799		TRUE	FALSE	FALSE	curated	TRUE	1.72	0.294	0	0	3845	0.476
CPI-SC00064A9CE	COL20A1_a2b1 complex	simple:Q9P218	complex:a2b1 complex	ENSG00000101203		TRUE	FALSE	FALSE	curated	TRUE	0	0.305	0.571	0	0	0.49
CPI-SC06873D10F	COL17A1_a2b1 complex	simple:Q9UMD9	complex:a2b1 complex	ENSG00000065618		TRUE	FALSE	FALSE	curated	TRUE	0	0.37	0.458	0	0	0.399
CPI-SC0E3784FFB	LAMC1_a2b1 complex	simple:P11047	complex:a2b1 complex	ENSG00000135862		TRUE	FALSE	FALSE	curated	TRUE	1898	1332	1341	0	1.28	0.759
CPI-SC0D9B795CC	CDH1_a2b1 complex	simple:P12830	complex:a2b1 complex	ENSG00000039068		FALSE	FALSE	FALSE	curated	TRUE	2.14	0.875	0.477	0	0	0.264
CPI-SC04F2478E9	FN1_a3b1 complex	simple:P02751	complex:a3b1 complex	ENSG00000115414		TRUE	FALSE	FALSE	curated	TRUE	3214	0	0.564	0	0	0.442
CPI-SC02BFEEC8A	THBS1_a3b1 complex	simple:P07996	complex:a3b1 complex	ENSG00000137801		FALSE	FALSE	FALSE	curated	TRUE	0.932	0	0	0	2018	0.524
CPI-SC0ED0520DD	LAMA3_a3b1 complex	simple:Q16787	complex:a3b1 complex	ENSG00000053747		TRUE	FALSE	FALSE	curated	TRUE	0	0	0.94	0	0	0.375
CPI-SC09938698A	CSPG4_a3b1 complex	simple:Q6UVK1	complex:a3b1 complex	ENSG00000173546		FALSE	FALSE	FALSE	curated	TRUE	0	0	0.603	0	0.802	0.406
CPI-SC06364D669	FN1_a4b1 complex	simple:P02751	complex:a4b1 complex	ENSG00000115414		TRUE	FALSE	FALSE	curated	TRUE	3.29	3588	1044	0	1992	1326
CPI-SC0BC542ACC	TNC_a4b1 complex	simple:P24821	complex:a4b1 complex	ENSG00000041982		TRUE	FALSE	FALSE	curated	TRUE	0.17	1.6	0.528	0	2026	0.515
CPI-SC0E9C058EB	PLAUR_a4b1 complex	simple:Q03405	complex:a4b1 complex	ENSG00000011422		TRUE	TRUE	FALSE	curated	TRUE	0.392	2315	0.461	0	2721	1255
CPI-SC0A9EB628A	VCAM1_a4b1 complex	simple:P19320	complex:a4b1 complex	ENSG00000162692		FALSE	FALSE	FALSE	curated	TRUE	0.596	0	0.477	0	2546	2829
CPI-SC070D5A96F	JAM2_a4b1 complex	simple:P57087	complex:a4b1 complex	ENSG00000154721		FALSE	FALSE	FALSE	curated	TRUE	1395	1705	0.889	0	0.155	0.395
CPI-SC08B2AD7C6	FN1_a5b1 complex	simple:P02751	complex:a5b1 complex	ENSG00000115414		TRUE	FALSE	FALSE	curated	TRUE	3.68	2169	3368	0	0	0.822
CPI-SC0592EC3D0	L1CAM_a5b1 complex	simple:P32004	complex:a5b1 complex	ENSG00000198910		FALSE	FALSE	FALSE	curated	TRUE	0	0.165	0.478	0	2759	2439
CPI-SC058F72F90	FBN1_a5b1 complex	simple:P35555	complex:a5b1 complex	ENSG00000166147		TRUE	FALSE	FALSE	curated	TRUE	1935	0.628	0.521	0	0	1.89
CPI-SC092C3E4DF	FN1_a8b1 complex	simple:P02751	complex:a8b1 complex	ENSG00000115414		TRUE	FALSE	FALSE	curated	TRUE	3203	3588	0.944	0	0.156	1771
CPI-SC01195CB48	TNC_a8b1 complex	simple:P24821	complex:a8b1 complex	ENSG00000041982		TRUE	FALSE	FALSE	curated	TRUE	0.082	1.6	0	0	0	1764
CPI-SC096929DB0	FN1_aVb1 complex	simple:P02751	complex:aVb1 complex	ENSG00000115414		TRUE	FALSE	FALSE	curated	TRUE	3483	3588	0	0	0	1393
CPI-SC0847A64D2	FN1_aVb5 complex	simple:P02751	complex:aVb5 complex	ENSG00000115414		TRUE	FALSE	FALSE	curated	TRUE	3483	3003	1136	0	0.47	1667
CPI-SC0EEF3A379	LAMC1_a6b1 complex	simple:P11047	complex:a6b1 complex	ENSG00000135862		TRUE	FALSE	FALSE	curated	TRUE	2014	2621	0.461	0	2759	1286
CPI-SC0A2FE9693	LAMC1_a7b1 complex	simple:P11047	complex:a7b1 complex	ENSG00000135862		TRUE	FALSE	FALSE	curated	TRUE	1864	0	0.508	0	0	0.24
CPI-SS0CC5DCE80	CDH1_KLRG1	simple:P12830	simple:Q96E93	ENSG00000039068	ENSG00000139187	FALSE	FALSE	TRUE	curated	FALSE	0	2073	2204	0	2796	0
CPI-SS03DA2A820	FGF2_CD44	simple:P09038	simple:P16070	ENSG00000138685	ENSG00000026508	TRUE	FALSE	TRUE	I2D,InnateDB-All	FALSE	0.955	0.522	2338	0	0.231	0
CPI-SS0703338F5	LGALS9_CD44	simple:O00182	simple:P16070	ENSG00000168961	ENSG00000026508	TRUE	FALSE	TRUE	InnateDB	FALSE	1084	0.49	2846	0	1777	0
CPI-SS03722104E	HGF_CD44	simple:P14210	simple:P16070	ENSG00000019991	ENSG00000026508	TRUE	FALSE	TRUE	IMEx,InnateDB-All,IntAct	FALSE	1.36	0.451	0.681	0	2684	1592
CPI-SS008FB916C	FGF2_FGFR4	simple:P09038	simple:P22455	ENSG00000138685	ENSG00000160867	TRUE	FALSE	TRUE	curated	FALSE	0.23	0.261	0.063	0	0.08	0.924
CPI-SS0D9366D11	FGF1_FGFR4	simple:P05230	simple:P22455	ENSG00000113578	ENSG00000160867	TRUE	FALSE	TRUE	I2D,IMEx,InnateDB-All,IntAct	FALSE	1101	0.073	0	0	3059	1653
CPI-SS044CF7EAE	TNFRSF10A_FGFR4	simple:O00220	simple:P22455	ENSG00000104689	ENSG00000160867	TRUE	TRUE	TRUE	InnateDB-All	FALSE	0.138	0	0.924	0	0	0.663
CPI-SS07A03C20F	FGF19_FGFR4	simple:O95750	simple:P22455	ENSG00000162344	ENSG00000160867	TRUE	FALSE	TRUE	I2D,IMEx,InnateDB-All	FALSE	0	0.072	0.063	0	3059	1653
CPI-SS02896561C	FGF4_FGFR4	simple:P08620	simple:P22455	ENSG00000075388	ENSG00000160867	TRUE	FALSE	TRUE	I2D	FALSE	0	0.148	2846	0	1749	2422
CPI-SS0FA481114	FGF6_FGFR4	simple:P10767	simple:P22455	ENSG00000111241	ENSG00000160867	TRUE	FALSE	TRUE	I2D	FALSE	0	0.06	1825	0	NA	NA
CPI-SS01F67987A	FGF2_FGFR1	simple:P09038	simple:P11362	ENSG00000138685	ENSG00000077782	TRUE	FALSE	TRUE	curated	FALSE	0.85	1705	0.681	0	1433	0
CPI-SS0755A26DD	FGF1_FGFR1	simple:P05230	simple:P11362	ENSG00000113578	ENSG00000077782	TRUE	FALSE	TRUE	curated	FALSE	1721	1517	0	0	1569	1732
CPI-SS070A3A7E5	FGF19_FGFR1	simple:O95750	simple:P11362	ENSG00000162344	ENSG00000077782	TRUE	FALSE	TRUE	IMEx,InnateDB-All	FALSE	0	1515	0.924	0	1504	0.458
CPI-SS0FFB9E01B	FGF4_FGFR1	simple:P08620	simple:P11362	ENSG00000075388	ENSG00000077782	TRUE	FALSE	TRUE	I2D	FALSE	0	1592	0.129	0	0	0.428
CPI-SS014E486AB	FGF6_FGFR1	simple:P10767	simple:P11362	ENSG00000111241	ENSG00000077782	TRUE	FALSE	TRUE	I2D,InnateDB-All	FALSE	0	1504	0.063	0	NA	NA
CPI-SS03189F5F6	FGF10_FGFR1	simple:O15520	simple:P11362	ENSG00000070193	ENSG00000077782	TRUE	FALSE	TRUE	InnateDB-All	FALSE	0	1526	0	0	NA	NA
CPI-SS05A94DE17	FGF2_FGFR2	simple:P09038	simple:P21802	ENSG00000138685	ENSG00000066468	TRUE	FALSE	TRUE	curated	FALSE	0.227	1563	0.099	0	0	0.767
CPI-SS04A97448D	FGF1_FGFR2	simple:P05230	simple:P21802	ENSG00000113578	ENSG00000066468	TRUE	FALSE	TRUE	I2D,IMEx,InnateDB-All,IntAct,MINT	FALSE	1099	1375	0.082	0	0	0.354
CPI-SS06B86672A	CD44_FGFR2	simple:P16070	simple:P21802	ENSG00000026508	ENSG00000066468	TRUE	TRUE	TRUE	InnateDB-All	FALSE	0.396	2164	0.076	0	1244	0.317
CPI-SS0D67110B0	FGF4_FGFR2	simple:P08620	simple:P21802	ENSG00000075388	ENSG00000066468	TRUE	FALSE	TRUE	I2D	FALSE	0	1.45	0	0	0	0.261
CPI-SS08883E9F6	FGF6_FGFR2	simple:P10767	simple:P21802	ENSG00000111241	ENSG00000066468	TRUE	FALSE	TRUE	I2D,InnateDB-All	FALSE	0	1362	0.076	0	NA	NA
CPI-SS0AECC113F	FGF10_FGFR2	simple:O15520	simple:P21802	ENSG00000070193	ENSG00000066468	TRUE	FALSE	TRUE	I2D,IMEx,InnateDB-All,IntAct	FALSE	0	1384	0	0	NA	NA
CPI-SS0735F5C3A	TIMP1_FGFR2	simple:P01033	simple:P21802	ENSG00000102265	ENSG00000066468	TRUE	FALSE	TRUE	InnateDB-All	FALSE	0.662	3345	0.821	0	0.277	0.15
CPI-SS04640F9C3	TFF1_FGFR2	simple:P04155	simple:P21802	ENSG00000160182	ENSG00000066468	TRUE	FALSE	TRUE	IMEx,InnateDB-All,MINT	FALSE	0	1358	0.082	0	0	0.305
CPI-SS0DC322B61	ROS1_FGFR2	simple:P08922	simple:P21802	ENSG00000047936	ENSG00000066468	TRUE	TRUE	TRUE	I2D	FALSE	2295	0	3165	1.12	0	0.219
CPI-SS0348DB5E3	FGFR1_FGFR2	simple:P11362	simple:P21802	ENSG00000077782	ENSG00000066468	TRUE	TRUE	TRUE	InnateDB-All	FALSE	1579	2059	1243	2461	0	0.17
CPI-SS0D636A374	FGF2_FGFR3	simple:P09038	simple:P22607	ENSG00000138685	ENSG00000068078	TRUE	FALSE	TRUE	curated	FALSE	0.206	0	0.602	1062	NA	NA
CPI-SS015819E65	FGF1_FGFR3	simple:P05230	simple:P22607	ENSG00000113578	ENSG00000068078	TRUE	FALSE	TRUE	I2D,IMEx,InnateDB-All,IntAct	FALSE	1078	0	0.397	0.606	NA	NA
CPI-SS013E86AFF	FGF4_FGFR3	simple:P08620	simple:P22607	ENSG00000075388	ENSG00000068078	TRUE	FALSE	TRUE	I2D	FALSE	0	0	3162	1929	NA	NA
CPI-SS0F9EE20C3	FGF6_FGFR3	simple:P10767	simple:P22607	ENSG00000111241	ENSG00000068078	TRUE	FALSE	TRUE	I2D	FALSE	0	0	0.378	1273	NA	NA
CPI-SS0BF3ED143	FGFR2_FGFR3	simple:P21802	simple:P22607	ENSG00000066468	ENSG00000068078	TRUE	TRUE	TRUE	IMEx,InnateDB-All	FALSE	1416	0	0.391	1634	NA	NA
CPI-SS0CB6968B9	FGF2_FGFRL1	simple:P09038	simple:Q8N441	ENSG00000138685	ENSG00000127418	TRUE	FALSE	TRUE	I2D	FALSE	0.419	0.302	1136	1327	0	0.08
CPI-SC056BF6CBB	TNC_a9b1 complex	simple:P24821	complex:a9b1 complex	ENSG00000041982		TRUE	FALSE	FALSE	curated	TRUE	1348	1593	0	1238	0.11	0.123
CPI-SC062D34C2A	VCAM1_a9b1 complex	simple:P19320	complex:a9b1 complex	ENSG00000162692		FALSE	FALSE	FALSE	curated	TRUE	1775	0	0.51	1437	0	0.244
CPI-SS068C742A1	FGF1_TGFBR3	simple:P05230	simple:Q03167	ENSG00000113578	ENSG00000069702	TRUE	FALSE	TRUE	InnateDB-All	FALSE	1434	1974	2239	1328	0	0.233
CPI-SS085EE60B1	TGFB1_TGFBR3	simple:P01137	simple:Q03167	ENSG00000105329	ENSG00000069702	TRUE	FALSE	TRUE	curated	FALSE	0	1964	2861	0	NA	NA
CPI-SS0FB37E079	INHA_TGFBR3	simple:P05111	simple:Q03167	ENSG00000123999	ENSG00000069702	TRUE	FALSE	TRUE	I2D	FALSE	1129	4158	0.21	0	0	0.846
CPI-SS0178F5C45	TGFB2_TGFBR3	simple:P61812	simple:Q03167	ENSG00000092969	ENSG00000069702	TRUE	FALSE	TRUE	curated	FALSE	0.471	0	0	0	NA	NA
CPI-SC0A05D3880	THY1_aMb2 complex	simple:P04216	complex:aMb2 complex	ENSG00000154096		FALSE	FALSE	FALSE	curated	TRUE	0	0	2976	0	NA	NA
CPI-SC0B6D68FD5	ICAM1_aMb2 complex	simple:P05362	complex:aMb2 complex	ENSG00000090339		FALSE	TRUE	FALSE	curated	TRUE	1603	0	0.192	0	1282	0.734
CPI-SC0C3E2D267	F10_aMb2 complex	simple:P00742	complex:aMb2 complex	ENSG00000126218		TRUE	FALSE	FALSE	curated	TRUE	0	0	0	0	0	0.804
CPI-SC0527EEE7A	C3_aMb2 complex	simple:P01024	complex:aMb2 complex	ENSG00000125730		TRUE	FALSE	FALSE	curated	TRUE	0.767	0	0	0	0	0.755
CPI-SC0B292AEE6	GP1BA_aMb2 complex	simple:P07359	complex:aMb2 complex	ENSG00000185245		FALSE	FALSE	FALSE	curated	TRUE	0.313	0	0.71	0	0	0.665
CPI-SC0F9DD28F3	JAM3_aMb2 complex	simple:Q9BX67	complex:aMb2 complex	ENSG00000166086		TRUE	FALSE	FALSE	curated	TRUE	2367	0	3174	1.64	0	0.956
CPI-SC0C6B54D7A	THY1_aXb2 complex	simple:P04216	complex:aXb2 complex	ENSG00000154096		FALSE	FALSE	FALSE	curated	TRUE	0	0	0.403	1345	NA	NA
CPI-SC0A9458008	ICAM1_aXb2 complex	simple:P05362	complex:aXb2 complex	ENSG00000090339		FALSE	TRUE	FALSE	curated	TRUE	1571	0	3354	1929	0.349	0.845
CPI-SC04AED00CE	TNC_aVb6 complex	simple:P24821	complex:aVb6 complex	ENSG00000041982		TRUE	FALSE	FALSE	curated	TRUE	0.079	0.163	0	1252	NA	NA
CPI-SC0E60FEE99	TGFB1_aVb6 complex	simple:P01137	complex:aVb6 complex	ENSG00000105329		TRUE	FALSE	FALSE	curated	TRUE	0	0.137	3354	2063	NA	NA
CPI-SS0ACD487F0	L1CAM_L1CAM	simple:P32004	simple:P32004	ENSG00000198910	ENSG00000198910	FALSE	FALSE	FALSE	curated	FALSE	0	0	2094	1527	0.349	1.9
CPI-SC019DBDA78	VCAM1_aDb2 complex	simple:P19320	complex:aDb2 complex	ENSG00000162692		FALSE	FALSE	FALSE	curated	TRUE	0.53	0	2006	0.378	0	0.914
CPI-SS087B53ABF	JAM2_JAM3	simple:P57087	simple:Q9BX67	ENSG00000154721	ENSG00000166086	TRUE	FALSE	FALSE	curated	FALSE	1954	2457	2097	1232	0	0.775
CPI-SS0F9D53834	JAM3_JAM3	simple:Q9BX67	simple:Q9BX67	ENSG00000166086	ENSG00000166086	TRUE	FALSE	FALSE	curated	FALSE	2991	2991	1974	0	0.182	0.818
CPI-CS0157F2E34	ACVL1_BMPR2_GDF2	complex:ACVL1_BMPR2	simple:Q9UK05		ENSG00000263761	TRUE	TRUE	FALSE	curated	FALSE	0.072	0	0.525	0.241	0	0.939
CPI-SS055E061C9	LAMP1_FAM3C	simple:P11279	simple:Q92520	ENSG00000185896	ENSG00000196937	TRUE	TRUE	FALSE	InnateDB-All	FALSE	2747	2.39	0.459	0.092	0	0.928
CPI-SS02904BE32	GLRA2_FAM3C	simple:P23416	simple:Q92520	ENSG00000101958	ENSG00000196937	TRUE	TRUE	FALSE	InnateDB-All	FALSE	2404	0	0	0.119	0.289	2976
CPI-SS02CF96625	KIR2DL3_FAM3C	simple:P43628	simple:Q92520	ENSG00000273947	ENSG00000196937	TRUE	TRUE	FALSE	IMEx,IntAct	FALSE	0	1527	0.538	0.131	NA	NA
CPI-SS033CB0BB2	CXADR_FAM3C	simple:P78310	simple:Q92520	ENSG00000154639	ENSG00000196937	TRUE	TRUE	FALSE	IMEx,IntAct	FALSE	1644	1543	0.27	0.222	0	0.787
CPI-SS0E2431C09	PDCD1_FAM3C	simple:Q15116	simple:Q92520	ENSG00000276977	ENSG00000196937	TRUE	TRUE	FALSE	InnateDB-All	FALSE	0	1536	0	0.184	NA	NA
CPI-SS0AFC7BACF	ADGRG5_FAM3C	simple:Q8IZF4	simple:Q92520	ENSG00000159618	ENSG00000196937	TRUE	TRUE	FALSE	InnateDB-All	FALSE	0	1696	0	0.193	1245	0.987
CPI-SS064281234	LAMP1_VSTM1	simple:P11279	simple:Q6UX27	ENSG00000185896	ENSG00000276363	TRUE	TRUE	TRUE	IMEx,IntAct	FALSE	1669	0	0.223	0	0.767	1.81
CPI-SS0F5B6B186	PDCD1_PDCD1LG2	simple:Q15116	simple:Q9BQ51	ENSG00000276977	ENSG00000197646	TRUE	TRUE	TRUE	curated	FALSE	0	0.132	0.25	0.049	NA	NA
CPI-CS08CC8F9D3	ACVR1_BMPR2_BMP7	complex:ACVR1_BMPR2	simple:P18075		ENSG00000101144	TRUE	TRUE	FALSE	curated	FALSE	1.46	0.517	0	0.051	0	0.456
CPI-CS046B3C139	ACVR_1A2A receptor_BMP7	complex:ACVR_1A2A receptor	simple:P18075		ENSG00000101144	TRUE	TRUE	FALSE	curated	FALSE	1.46	0.366	0.25	0.07	0	0
CPI-CS0288D901D	ACVR_1A2B receptor_BMP7	complex:ACVR_1A2B receptor	simple:P18075		ENSG00000101144	TRUE	TRUE	FALSE	curated	FALSE	1.46	0.517	0	0.128	0	1.83
CPI-CS05EAF93CC	BMPR1A_BMPR2_BMP7	complex:BMPR1A_BMPR2	simple:P18075		ENSG00000101144	TRUE	TRUE	FALSE	curated	FALSE	1.61	1385	0	0.031	1477	1.71
CPI-CS08109C435	BMPR1B_BMPR2_BMP7	complex:BMPR1B_BMPR2	simple:P18075		ENSG00000101144	TRUE	TRUE	FALSE	curated	FALSE	1392	1.05	0	0.339	0	1332
CPI-CS0D35E69F6	BMR1A_ACR2A_BMP7	complex:BMR1A_ACR2A	simple:P18075		ENSG00000101144	TRUE	TRUE	FALSE	curated	FALSE	1826	0.366	0	0.125	1634	2516
CPI-CS0C99F8D96	BMR1A_AVR2B_BMP7	complex:BMR1A_AVR2B	simple:P18075		ENSG00000101144	TRUE	TRUE	FALSE	curated	FALSE	1973	0.62	0.688	1434	1759	3973
CPI-CS0DF85303A	BMR1B_AVR2A_BMP7	complex:BMR1B_AVR2A	simple:P18075		ENSG00000101144	TRUE	TRUE	FALSE	curated	FALSE	1392	0.366	0	1396	1605	0
CPI-CS08A853007	BMR1B_AVR2B_BMP7	complex:BMR1B_AVR2B	simple:P18075		ENSG00000101144	TRUE	TRUE	FALSE	curated	FALSE	1392	0.62	0.641	0	0	0.383
CPI-CS0E1BF543E	ACVR1_BMPR2_BMP5	complex:ACVR1_BMPR2	simple:P22003		ENSG00000112175	TRUE	TRUE	FALSE	curated	FALSE	1456	0.481	0.669	1261	0	0.483
CPI-CS0EC80CA59	ACVR_1A2A receptor_BMP5	complex:ACVR_1A2A receptor	simple:P22003		ENSG00000112175	TRUE	TRUE	FALSE	curated	FALSE	1456	0.33	0	1263	0	0.199
CPI-CS0FCC00896	ACVR_1A2B receptor_BMP5	complex:ACVR_1A2B receptor	simple:P22003		ENSG00000112175	TRUE	TRUE	FALSE	curated	FALSE	1456	0.481	0.669	1282	0	0.493
CPI-CS046BCFC6F	BMPR1A_BMPR2_BMP5	complex:BMPR1A_BMPR2	simple:P22003		ENSG00000112175	TRUE	TRUE	FALSE	curated	FALSE	1606	1349	0	1.34	0	0.258
CPI-CS02C93975C	BMPR1B_BMPR2_BMP5	complex:BMPR1B_BMPR2	simple:P22003		ENSG00000112175	TRUE	TRUE	FALSE	curated	FALSE	1388	1014	0	1246	0	0.769
CPI-CS047EE9E03	BMR1A_ACR2A_BMP5	complex:BMR1A_ACR2A	simple:P22003		ENSG00000112175	TRUE	TRUE	FALSE	curated	FALSE	1821	0.33	0.475	0.44	0	0
CPI-CS0CA393CC5	BMR1A_AVR2B_BMP5	complex:BMR1A_AVR2B	simple:P22003		ENSG00000112175	TRUE	TRUE	FALSE	curated	FALSE	1969	0.583	0	0.402	0.624	0
CPI-CS01A4D7E2F	BMR1B_AVR2A_BMP5	complex:BMR1B_AVR2A	simple:P22003		ENSG00000112175	TRUE	TRUE	FALSE	curated	FALSE	1388	0.33	0.428	0.677	0	2434
CPI-CS0BEC40E19	BMR1B_AVR2B_BMP5	complex:BMR1B_AVR2B	simple:P22003		ENSG00000112175	TRUE	TRUE	FALSE	curated	FALSE	1388	0.583	0.428	0	0.196	0.196
CPI-CS0C16967C6	ACVR1_BMPR2_BMP6	complex:ACVR1_BMPR2	simple:P22004		ENSG00000153162	TRUE	TRUE	FALSE	curated	FALSE	1755	3011	0.456	0.267	0	0
CPI-CS0FFBA02F8	ACVR_1A2A receptor_BMP6	complex:ACVR_1A2A receptor	simple:P22004		ENSG00000153162	TRUE	TRUE	FALSE	curated	FALSE	1755	2.86	0.456	0.287	1009	2475
CPI-CS02AEFFE28	ACVR_1A2B receptor_BMP6	complex:ACVR_1A2B receptor	simple:P22004		ENSG00000153162	TRUE	TRUE	FALSE	curated	FALSE	1755	3011	0	0.346	2794	2794
CPI-CS0F6CFB979	BMPR1A_BMPR2_BMP6	complex:BMPR1A_BMPR2	simple:P22004		ENSG00000153162	TRUE	TRUE	FALSE	curated	FALSE	1906	3879	0	0.249	0	0
CPI-CS0EF793D6A	BMPR1B_BMPR2_BMP6	complex:BMPR1B_BMPR2	simple:P22004		ENSG00000153162	TRUE	TRUE	FALSE	curated	FALSE	1688	3544	0	0.557	1447	2589
CPI-CS0247DA882	BMR1A_ACR2A_BMP6	complex:BMR1A_ACR2A	simple:P22004		ENSG00000153162	TRUE	TRUE	FALSE	curated	FALSE	2121	2.86	0	0.343	0.644	0
CPI-CS076E1A639	BMR1A_AVR2B_BMP6	complex:BMR1A_AVR2B	simple:P22004		ENSG00000153162	TRUE	TRUE	FALSE	curated	FALSE	2269	3114	0	0.252	0	1783
CPI-CS0921BB754	BMR1B_AVR2A_BMP6	complex:BMR1B_AVR2A	simple:P22004		ENSG00000153162	TRUE	TRUE	FALSE	curated	FALSE	1688	2.86	0	0.372	0	1724
CPI-CS0C0D60519	BMR1B_AVR2B_BMP6	complex:BMR1B_AVR2B	simple:P22004		ENSG00000153162	TRUE	TRUE	FALSE	curated	FALSE	1688	3114	0	0.248	1.31	0
CPI-CS0AEE2FB22	ACVR1_BMPR2_BMP8A	complex:ACVR1_BMPR2	simple:Q7Z5Y6		ENSG00000183682	TRUE	TRUE	FALSE	curated	FALSE	1619	0.312	1246	0.737	0	0
CPI-CS0CE2A204A	ACVR_1A2A receptor_BMP8A	complex:ACVR_1A2A receptor	simple:Q7Z5Y6		ENSG00000183682	TRUE	TRUE	FALSE	curated	FALSE	1619	0.161	1621	0.84	0	0
CPI-CS0860DA460	ACVR_1A2B receptor_BMP8A	complex:ACVR_1A2B receptor	simple:Q7Z5Y6		ENSG00000183682	TRUE	TRUE	FALSE	curated	FALSE	1619	0.312	0.332	0.615	0	0.167
CPI-CS090FFEDFE	BMPR1A_BMPR2_BMP8A	complex:BMPR1A_BMPR2	simple:Q7Z5Y6		ENSG00000183682	TRUE	TRUE	FALSE	curated	FALSE	1.77	1.18	0	0.578	0	0.699
CPI-CS0484364A2	BMPR1B_BMPR2_BMP8A	complex:BMPR1B_BMPR2	simple:Q7Z5Y6		ENSG00000183682	TRUE	TRUE	FALSE	curated	FALSE	1552	0.845	0.285	0	0	0.255
CPI-CS0C091F24B	BMR1A_ACR2A_BMP8A	complex:BMR1A_ACR2A	simple:Q7Z5Y6		ENSG00000183682	TRUE	TRUE	FALSE	curated	FALSE	1985	0.161	0.313	0.443	0	0.699
CPI-CS017A50010	BMR1A_AVR2B_BMP8A	complex:BMR1A_AVR2B	simple:Q7Z5Y6		ENSG00000183682	TRUE	TRUE	FALSE	curated	FALSE	2132	0.415	0.313	0.463	0	1181
CPI-CS01319F57A	BMR1B_AVR2A_BMP8A	complex:BMR1B_AVR2A	simple:Q7Z5Y6		ENSG00000183682	TRUE	TRUE	FALSE	curated	FALSE	1552	0.161	0	0.521	0	1243
CPI-CS03DF8BD36	BMR1B_AVR2B_BMP8A	complex:BMR1B_AVR2B	simple:Q7Z5Y6		ENSG00000183682	TRUE	TRUE	FALSE	curated	FALSE	1552	0.415	0	0.425	0	0.255
CPI-CC045C36F28	ACVR_1A2A receptor_Activin ligand ab	complex:ACVR_1A2A receptor	complex:Activin ligand ab			TRUE	TRUE	FALSE	curated	FALSE	2256	0	0	0.733	0	1181
CPI-CC09863F59B	ACVR_1A2B receptor_Activin ligand ab	complex:ACVR_1A2B receptor	complex:Activin ligand ab			TRUE	TRUE	FALSE	curated	FALSE	2256	0	0	0.518	0	0.255
CPI-CC0104F2A96	ACVR_1B2A receptor_Activin ligand ab	complex:ACVR_1B2A receptor	complex:Activin ligand ab			TRUE	TRUE	FALSE	curated	FALSE	2622	0	0.483	0.802	0	1243
CPI-CC072007F09	ACVR_1B2B receptor_Activin ligand ab	complex:ACVR_1B2B receptor	complex:Activin ligand ab			TRUE	TRUE	FALSE	curated	FALSE	2769	0	0.149	0.821	1201	0.699
CPI-CC0947744F4	ACVR_1C2A receptor_Activin ligand ab	complex:ACVR_1C2A receptor	complex:Activin ligand ab			TRUE	TRUE	FALSE	curated	FALSE	1454	0	0.092	0	1436	0.255
CPI-CC0B6E6E341	ACVR_1C2B receptor_Activin ligand ab	complex:ACVR_1C2B receptor	complex:Activin ligand ab			TRUE	TRUE	FALSE	curated	FALSE	1454	0	0	0	1436	0.699
CPI-CS091BF99D0	ACVR_1A2A receptor_INHBA	complex:ACVR_1A2A receptor	simple:P08476		ENSG00000122641	TRUE	TRUE	FALSE	curated	FALSE	2256	0	0	0	1201	1181
CPI-CS04DD927C9	ACVR_1A2B receptor_INHBA	complex:ACVR_1A2B receptor	simple:P08476		ENSG00000122641	TRUE	TRUE	FALSE	curated	FALSE	2256	0	0.175	0	1201	1243
CPI-CS0533A30DC	ACVR_1B2A receptor_INHBA	complex:ACVR_1B2A receptor	simple:P08476		ENSG00000122641	TRUE	TRUE	FALSE	curated	FALSE	2622	0	0.427	0.852	1589	0.255
CPI-CS0C159B54D	ACVR_1B2B receptor_INHBA	complex:ACVR_1B2B receptor	simple:P08476		ENSG00000122641	TRUE	TRUE	FALSE	curated	FALSE	2769	0	0.44	1213	1589	1181
CPI-CS0924060DB	ACVR_1C2A receptor_INHBA	complex:ACVR_1C2A receptor	simple:P08476		ENSG00000122641	TRUE	TRUE	FALSE	curated	FALSE	1454	0	0.559	1016	2838	0.255
CPI-CS0B79F5D68	ACVR_1C2B receptor_INHBA	complex:ACVR_1C2B receptor	simple:P08476		ENSG00000122641	TRUE	TRUE	FALSE	curated	FALSE	1454	0	0	2281	1923	1243
CPI-CS073233FCC	ACVR_1A2A receptor_INHBB	complex:ACVR_1A2A receptor	simple:P09529		ENSG00000163083	TRUE	TRUE	FALSE	curated	FALSE	4655	0.869	0	2241	0	3125
CPI-CS048465560	ACVR_1A2B receptor_INHBB	complex:ACVR_1A2B receptor	simple:P09529		ENSG00000163083	TRUE	TRUE	FALSE	curated	FALSE	4655	1021	0.498	2.82	0	2681
CPI-CS02899BF8B	ACVR_1B2A receptor_INHBB	complex:ACVR_1B2A receptor	simple:P09529		ENSG00000163083	TRUE	TRUE	FALSE	curated	FALSE	5.02	0.869	0.446	2331	0	3125
CPI-CS085EF890A	ACVR_1B2B receptor_INHBB	complex:ACVR_1B2B receptor	simple:P09529		ENSG00000163083	TRUE	TRUE	FALSE	curated	FALSE	5168	1123	0	2246	0	3607
CPI-CS007ADC2D1	ACVR_1C2A receptor_INHBB	complex:ACVR_1C2A receptor	simple:P09529		ENSG00000163083	TRUE	TRUE	FALSE	curated	FALSE	3852	0.869	0.227	0	0	3669
CPI-CS0A5400A6A	ACVR_1C2B receptor_INHBB	complex:ACVR_1C2B receptor	simple:P09529		ENSG00000163083	TRUE	TRUE	FALSE	curated	FALSE	3852	0.872	0.204	0	0	2681
CPI-CS0E54FF657	BMPR1A_BMPR2_BMP4	complex:BMPR1A_BMPR2	simple:P12644		ENSG00000125378	TRUE	TRUE	FALSE	curated	FALSE	0	1309	0.899	0	0	3607
CPI-CS0107C51C6	BMPR1B_BMPR2_BMP4	complex:BMPR1B_BMPR2	simple:P12644		ENSG00000125378	TRUE	TRUE	FALSE	curated	FALSE	0	0.974	0	0	0	2681
CPI-CS012D15A88	BMR1A_ACR2A_BMP4	complex:BMR1A_ACR2A	simple:P12644		ENSG00000125378	TRUE	TRUE	FALSE	curated	FALSE	0	0.29	0.227	0	0	3669
CPI-CS0BCDC40FC	BMR1A_AVR2B_BMP4	complex:BMR1A_AVR2B	simple:P12644		ENSG00000125378	TRUE	TRUE	FALSE	curated	FALSE	0	0.544	0.755	0	1136	0
CPI-CS02957B1BF	BMR1B_AVR2A_BMP4	complex:BMR1B_AVR2A	simple:P12644		ENSG00000125378	TRUE	TRUE	FALSE	curated	FALSE	0	0.29	2705	0	1371	0
CPI-CS0E997FABD	BMR1B_AVR2B_BMP4	complex:BMR1B_AVR2B	simple:P12644		ENSG00000125378	TRUE	TRUE	FALSE	curated	FALSE	0	0.544	0.132	0	1371	0
CPI-CS09CECD20D	BMPR1A_BMPR2_GDF5	complex:BMPR1A_BMPR2	simple:P43026		ENSG00000125965	TRUE	TRUE	FALSE	curated	FALSE	1614	0	0.109	0	1136	0
CPI-CS0700FDD27	BMPR1B_BMPR2_GDF5	complex:BMPR1B_BMPR2	simple:P43026		ENSG00000125965	TRUE	TRUE	FALSE	curated	FALSE	1396	0	0.804	0	1136	0
CPI-CS0DAA66443	BMR1A_ACR2A_GDF5	complex:BMR1A_ACR2A	simple:P43026		ENSG00000125965	TRUE	TRUE	FALSE	curated	FALSE	1829	0	0.37	2185	1524	0
CPI-CS036BF2AC7	BMR1A_AVR2B_GDF5	complex:BMR1A_AVR2B	simple:P43026		ENSG00000125965	TRUE	TRUE	FALSE	curated	FALSE	1977	0	0.347	1997	1524	0
CPI-CS069E2161D	BMR1B_AVR2A_GDF5	complex:BMR1B_AVR2A	simple:P43026		ENSG00000125965	TRUE	TRUE	FALSE	curated	FALSE	1396	0	0.347	1997	2773	0
CPI-CS089A36491	BMR1B_AVR2B_GDF5	complex:BMR1B_AVR2B	simple:P43026		ENSG00000125965	TRUE	TRUE	FALSE	curated	FALSE	1396	0	0.074	0.468	1858	0
CPI-CS0B9A4CA4D	BMPR1A_BMPR2_GDF6	complex:BMPR1A_BMPR2	simple:Q6KF10		ENSG00000156466	TRUE	TRUE	FALSE	curated	FALSE	1614	0	0	0.178	2819	0.45
CPI-CS0C623F17A	BMPR1B_BMPR2_GDF6	complex:BMPR1B_BMPR2	simple:Q6KF10		ENSG00000156466	TRUE	TRUE	FALSE	curated	FALSE	1396	0	0	0	2819	0.894
CPI-CS04C402DFB	BMR1A_ACR2A_GDF6	complex:BMR1A_ACR2A	simple:Q6KF10		ENSG00000156466	TRUE	TRUE	FALSE	curated	FALSE	1829	0	0.323	0	2708	0.45
CPI-CS0546460D1	BMR1A_AVR2B_GDF6	complex:BMR1A_AVR2B	simple:Q6KF10		ENSG00000156466	TRUE	TRUE	FALSE	curated	FALSE	1977	0	0.191	0	2708	0.495
CPI-CS0D9226707	BMR1B_AVR2A_GDF6	complex:BMR1B_AVR2A	simple:Q6KF10		ENSG00000156466	TRUE	TRUE	FALSE	curated	FALSE	1396	0	2063	2642	2.48	0.368
CPI-CS027F8BD7E	BMR1B_AVR2B_GDF6	complex:BMR1B_AVR2B	simple:Q6KF10		ENSG00000156466	TRUE	TRUE	FALSE	curated	FALSE	1396	0	2717	2717	2.48	0.368
CPI-CS0CFA0E4C5	BMPR1A_BMPR2_GDF7	complex:BMPR1A_BMPR2	simple:Q7Z4P5		ENSG00000143869	TRUE	TRUE	FALSE	curated	FALSE	3132	1.57	0.111	0.21	2819	0.45
CPI-CS027D7A724	BMPR1B_BMPR2_GDF7	complex:BMPR1B_BMPR2	simple:Q7Z4P5		ENSG00000143869	TRUE	TRUE	FALSE	curated	FALSE	2914	1234	0	0.242	2819	0.894
CPI-CS05789C9A0	BMR1A_ACR2A_GDF7	complex:BMR1A_ACR2A	simple:Q7Z4P5		ENSG00000143869	TRUE	TRUE	FALSE	curated	FALSE	3347	0.55	0.27	0	2708	0.45
CPI-CS0E5078EDE	BMR1A_AVR2B_GDF7	complex:BMR1A_AVR2B	simple:Q7Z4P5		ENSG00000143869	TRUE	TRUE	FALSE	curated	FALSE	3495	0.804	0	2.1	2708	0.495
CPI-CS0BDA0D08C	BMR1B_AVR2A_GDF7	complex:BMR1B_AVR2A	simple:Q7Z4P5		ENSG00000143869	TRUE	TRUE	FALSE	curated	FALSE	2914	0.55	1486	2181	2.48	0.368
CPI-CS055E15573	BMR1B_AVR2B_GDF7	complex:BMR1B_AVR2B	simple:Q7Z4P5		ENSG00000143869	TRUE	TRUE	FALSE	curated	FALSE	2914	0.804	0.512	1895	2.48	0.368
CPI-CS0A8F7D89F	BMPR1B_BMPR2_BMP15	complex:BMPR1B_BMPR2	simple:O95972		ENSG00000130385	TRUE	TRUE	FALSE	curated	FALSE	0	2846	0	1918	4193	1468
CPI-CS0569B9B91	BMPR1B_BMPR2_BMPR1A	complex:BMPR1B_BMPR2	simple:P36894		ENSG00000107779	FALSE	TRUE	TRUE	curated	FALSE	2413	2773	1607	2306	4193	1912
CPI-CS04F78ACD6	ACVR_1B2A receptor_GDF11	complex:ACVR_1B2A receptor	simple:O95390		ENSG00000135414	TRUE	TRUE	FALSE	curated	FALSE	2015	0.215	0	1935	4082	1468
CPI-CS0384572FE	ACVR_1B2B receptor_GDF11	complex:ACVR_1B2B receptor	simple:O95390		ENSG00000135414	TRUE	TRUE	FALSE	curated	FALSE	2162	0.469	0	1989	4082	1513
CPI-CS0C8F1E01F	ACVR_1B2A receptor_BMP3	complex:ACVR_1B2A receptor	simple:P12645		ENSG00000152785	TRUE	TRUE	FALSE	curated	FALSE	2685	0	0	0.242	3854	1386
CPI-CS06C0EEFCB	ACVR_1B2B receptor_GDF10	complex:ACVR_1B2B receptor	simple:P55107		ENSG00000266524	TRUE	TRUE	FALSE	curated	FALSE	1976	0	0.06	0	NA	NA
CPI-CS0B2F2EF5D	ACVR_1B2B receptor_GDF3	complex:ACVR_1B2B receptor	simple:Q9NR23		ENSG00000184344	TRUE	TRUE	FALSE	curated	FALSE	2129	0	0.383	0	3854	1386
CPI-SS0B02DE712	EGFR_NRG1	simple:P00533	simple:Q02297	ENSG00000146648	ENSG00000157168	TRUE	TRUE	TRUE	I2D,IMEx,InnateDB-All,IntAct	FALSE	0	4289	0	0	1313	0
CPI-SS00A953C3A	EGF_NRG1	simple:P01133	simple:Q02297	ENSG00000138798	ENSG00000157168	TRUE	FALSE	TRUE	I2D	FALSE	1869	0	1395	0	1313	0
CPI-SS0BF9FA3F2	ERBB3_NRG1	simple:P21860	simple:Q02297	ENSG00000065361	ENSG00000157168	TRUE	TRUE	TRUE	curated	FALSE	0.416	2839	0	0	1701	0
CPI-SS0F4D30D5A	EGFR_EGF	simple:P00533	simple:P01133	ENSG00000146648	ENSG00000138798	TRUE	TRUE	FALSE	curated	FALSE	0	3136	0	0	1701	0
CPI-SS0E25CE362	EGFR_TGFA	simple:P00533	simple:P01135	ENSG00000146648	ENSG00000163235	TRUE	TRUE	FALSE	curated	FALSE	0	3255	0.086	0	2.95	0
CPI-SS0055264F3	EGFR_TGFB1	simple:P00533	simple:P01137	ENSG00000146648	ENSG00000105329	TRUE	TRUE	FALSE	IMEx,InnateDB-All,MINT	FALSE	0	0	1053	0	NA	NA
CPI-SS08CA619FE	EGFR_GRN	simple:P00533	simple:P28799	ENSG00000146648	ENSG00000030582	TRUE	TRUE	FALSE	InnateDB-All	FALSE	0	2.21	0	0	2035	0
CPI-SS0DA033F03	TNFRSF1A_GRN	simple:P19438	simple:P28799	ENSG00000067182	ENSG00000030582	TRUE	TRUE	FALSE	IMEx,InnateDB-All,MINT	FALSE	0	0.886	0	0	0	1219
CPI-SS054D158CC	NTRK1_GRN	simple:P04629	simple:P28799	ENSG00000198400	ENSG00000030582	TRUE	TRUE	FALSE	InnateDB-All	FALSE	0	0.801	0	0.143	0	1281
CPI-SS0C4E86714	TNFRSF1B_GRN	simple:P20333	simple:P28799	ENSG00000028137	ENSG00000030582	TRUE	TRUE	FALSE	IMEx,InnateDB-All,MINT	FALSE	1117	0.997	0.463	0.234	0	0.293
CPI-SS0A19E9C34	EGFR_BTC	simple:P00533	simple:P35070	ENSG00000146648	ENSG00000174808	TRUE	TRUE	FALSE	curated	FALSE	0	0	0.463	0.234	0	1219
CPI-SS06BC4D123	ERBB3_BTC	simple:P21860	simple:P35070	ENSG00000065361	ENSG00000174808	TRUE	TRUE	FALSE	curated	FALSE	0.793	0	0.463	0.234	0	0.293
CPI-SS088A0A760	EGFR_COPA	simple:P00533	simple:P53621	ENSG00000146648	ENSG00000122218	TRUE	TRUE	FALSE	InnateDB-All	FALSE	0	2.84	1119	0.517	0	1281
CPI-SS0302E8E8F	CD74_COPA	simple:P04233	simple:P53621	ENSG00000019582	ENSG00000122218	TRUE	TRUE	FALSE	IMEx,IntAct	FALSE	1591	3987	1119	0.517	1176	0
CPI-SS0E6E8A727	NTRK1_COPA	simple:P04629	simple:P53621	ENSG00000198400	ENSG00000122218	TRUE	TRUE	FALSE	InnateDB-All	FALSE	0	1431	2019	0.443	1176	0
CPI-SS04C3EC52C	MTNR1B_COPA	simple:P49286	simple:P53621	ENSG00000134640	ENSG00000122218	TRUE	TRUE	FALSE	I2D,IMEx,InnateDB-All,IntAct	FALSE	0	1496	1279	0.464	NA	NA
CPI-SS0C10824C7	EGFR_HBEGF	simple:P00533	simple:Q99075	ENSG00000146648	ENSG00000113070	TRUE	TRUE	TRUE	curated	FALSE	0	0	2562	0.443	1564	0
CPI-SS0632A027A	CD44_HBEGF	simple:P16070	simple:Q99075	ENSG00000026508	ENSG00000113070	TRUE	TRUE	TRUE	I2D,InnateDB-All	FALSE	0.383	0	1279	0.464	1564	0
CPI-SS03098AC28	ERBB4_HBEGF	simple:Q15303	simple:Q99075	ENSG00000178568	ENSG00000113070	TRUE	TRUE	TRUE	curated	FALSE	3349	0	0.535	0	2813	0
CPI-SS03C51D352	TNFRSF13B_TNFSF13B	simple:O14836	simple:Q9Y275	ENSG00000240505	ENSG00000102524	TRUE	TRUE	FALSE	curated	FALSE	0	0.083	0.535	0	NA	NA
CPI-SS03133B4F2	TFRC_TNFSF13B	simple:P02786	simple:Q9Y275	ENSG00000072274	ENSG00000102524	TRUE	TRUE	FALSE	IMEx,IntAct	FALSE	0	1672	0.535	0	NA	NA
CPI-SS0F00D756A	CD40_TNFSF13B	simple:P25942	simple:Q9Y275	ENSG00000101017	ENSG00000102524	TRUE	TRUE	FALSE	I2D,InnateDB	FALSE	0	0.121	1191	0	NA	NA
CPI-SS0E2863F09	TNFRSF17_TNFSF13B	simple:Q02223	simple:Q9Y275	ENSG00000048462	ENSG00000102524	TRUE	TRUE	FALSE	curated	FALSE	0	0.072	1191	0	NA	NA
CPI-SS09648FAA9	TNFRSF13C_TNFSF13B	simple:Q96RJ3	simple:Q9Y275	ENSG00000159958	ENSG00000102524	TRUE	TRUE	FALSE	guidetopharmacology.org	FALSE	0	0.092	2091	0	NA	NA
CPI-SS09808DEAE	CD74_APP	simple:P04233	simple:P05067	ENSG00000019582	ENSG00000142192	FALSE	TRUE	FALSE	curated	FALSE	1523	4.25	1351	0	1898	0
CPI-SS09C4FCB90	ICAM1_SPN	simple:P05362	simple:P16150	ENSG00000090339	ENSG00000197471	FALSE	TRUE	FALSE	curated	FALSE	1604	0	2634	0	1232	0
CPI-SS0E9A581F8	ICAM1_ITGAL	simple:P05362	simple:P20701	ENSG00000090339	ENSG00000005844	FALSE	TRUE	TRUE	curated	FALSE	1717	0	1351	0	1232	0
CPI-SC0F4AC5AA2	ICAM1_aLb2 complex	simple:P05362	complex:aLb2 complex	ENSG00000090339		FALSE	TRUE	FALSE	curated	TRUE	1603	0	0.465	2756	1.62	0
CPI-SC063BC3DDE	ICAM2_aLb2 complex	simple:P13598	complex:aLb2 complex	ENSG00000108622		FALSE	FALSE	FALSE	curated	TRUE	0.145	0	0.465	2756	NA	NA
CPI-SC08923F7F7	F11R_aLb2 complex	simple:Q9Y624	complex:aLb2 complex	ENSG00000158769		FALSE	TRUE	FALSE	curated	TRUE	0.606	0	0.465	2756	1.62	0
CPI-SS0A4F27388	TNFRSF1A_FASLG	simple:P19438	simple:P48023	ENSG00000067182	ENSG00000117560	TRUE	TRUE	FALSE	I2D,InnateDB-All	FALSE	0	0	1121	3.04	2869	0
CPI-SS0049FD74F	TNFRSF10B_FASLG	simple:O14763	simple:P48023	ENSG00000120889	ENSG00000117560	TRUE	TRUE	FALSE	I2D,InnateDB-All	FALSE	1664	0	1121	3.04	1954	0
CPI-SS03A0C857B	FAS_FASLG	simple:P25445	simple:P48023	ENSG00000026103	ENSG00000117560	TRUE	TRUE	FALSE	curated	FALSE	0	0	2021	2966	3171	1402
CPI-SS004A073E1	NTRK1_NTF3	simple:P04629	simple:P20783	ENSG00000198400	ENSG00000185652	TRUE	TRUE	FALSE	curated	FALSE	0	0.487	1281	2986	NA	NA
CPI-SS0B1AB068C	NTRK1_GPI	simple:P04629	simple:P06744	ENSG00000198400	ENSG00000282019	TRUE	TRUE	FALSE	InnateDB-All	FALSE	0	1669	2564	2966	3171	1464
CPI-SS0391D4602	NTRK1_NAMPT	simple:P04629	simple:P43490	ENSG00000198400	ENSG00000105835	TRUE	TRUE	FALSE	InnateDB-All	FALSE	0	1906	1281	2986	3559	0.476
CPI-SS00A6D366F	ADORA2A_NAMPT	simple:P29274	simple:P43490	ENSG00000128271	ENSG00000105835	TRUE	TRUE	FALSE	I2D,IMEx,InnateDB-All,MINT	FALSE	0	2002	0.323	0.212	3559	1402
CPI-SS05D1A6BEF	NTRK1_AIMP1	simple:P04629	simple:Q12904	ENSG00000198400	ENSG00000164022	TRUE	TRUE	FALSE	InnateDB-All	FALSE	0	1587	0.323	0.212	4808	0.476
CPI-SS074CF011C	ERBB4_NRG4	simple:Q15303	simple:Q8WWG1	ENSG00000178568	ENSG00000169752	TRUE	TRUE	FALSE	curated	FALSE	0	2905	0.323	0.212	3893	1464
CPI-CS067298D94	FLT1 complex_VEGFA	complex:FLT1 complex	simple:P15692		ENSG00000112715	TRUE	TRUE	FALSE	curated	FALSE	0	0.433	0.979	0.496	0	3312
CPI-SS0DE0A486F	NRP1_VEGFA	simple:O14786	simple:P15692	ENSG00000099250	ENSG00000112715	TRUE	TRUE	FALSE	curated	FALSE	2157	1392	0.979	0.496	2248	2698
CPI-SS0E00478B4	NRP2_VEGFA	simple:O60462	simple:P15692	ENSG00000118257	ENSG00000112715	TRUE	TRUE	FALSE	curated	FALSE	0	0.408	1879	0.422	1288	0
CPI-CS073D36B1D	FLT1 complex_PGF	complex:FLT1 complex	simple:P49763		ENSG00000119630	TRUE	TRUE	FALSE	curated	FALSE	0	0.26	1139	0.443	1288	0
CPI-SS0855C0353	NRP1_PGF	simple:O14786	simple:P49763	ENSG00000099250	ENSG00000119630	TRUE	TRUE	FALSE	curated	FALSE	0	1218	2422	0.422	1341	0
CPI-SS0D22A09AD	NRP2_PGF	simple:O60462	simple:P49763	ENSG00000118257	ENSG00000119630	TRUE	TRUE	FALSE	curated	FALSE	0	0.235	1139	0.443	1341	0
CPI-SS0E61DB5DF	FLT1_PGF	simple:P17948	simple:P49763	ENSG00000102755	ENSG00000119630	TRUE	TRUE	FALSE	curated	FALSE	0	0.26	0.68	0.146	2897	1524
CPI-CS077F1340A	FLT1 complex_VEGFB	complex:FLT1 complex	simple:P49765		ENSG00000173511	TRUE	TRUE	FALSE	curated	FALSE	0	0	0.68	0.146	1981	0
CPI-SS033E6DE7E	NRP1_VEGFB	simple:O14786	simple:P49765	ENSG00000099250	ENSG00000173511	TRUE	TRUE	FALSE	curated	FALSE	1039	0	1798	0.102	0	0
CPI-SS0947A8549	FLT1_VEGFB	simple:P17948	simple:P49765	ENSG00000102755	ENSG00000173511	TRUE	TRUE	FALSE	curated	FALSE	1571	0	1496	0.102	0.445	0
CPI-SS098425155	ADRB2_VEGFB	simple:P07550	simple:P49765	ENSG00000169252	ENSG00000173511	TRUE	TRUE	FALSE	InnateDB-All	FALSE	0	0	1095	0.296	0	0
CPI-SS08083B141	NRP1_SEMA3A	simple:O14786	simple:Q14563	ENSG00000099250	ENSG00000075213	TRUE	TRUE	FALSE	curated	FALSE	0.514	2881	1095	0.296	0.533	4101
CPI-CS0E5D1ECCE	PlexinA1_complex3_SEMA3A	complex:PlexinA1_complex3	simple:Q14563		ENSG00000075213	TRUE	TRUE	FALSE	curated	FALSE	0.155	2653	0.68	0.146	2594	2342
CPI-CS0D238C22B	PlexinA2_complex1_SEMA3A	complex:PlexinA2_complex1	simple:Q14563		ENSG00000075213	TRUE	TRUE	FALSE	curated	FALSE	0.285	2206	0.68	0.146	0	2.53
CPI-CS0AA769F5B	PlexinA3_complex1_SEMA3A	complex:PlexinA3_complex1	simple:Q14563		ENSG00000075213	TRUE	TRUE	FALSE	curated	FALSE	0.335	2412	1798	0.102	0.398	4219
CPI-CS0AB19226A	PlexinA4_complex1_SEMA3A	complex:PlexinA4_complex1	simple:Q14563		ENSG00000075213	TRUE	TRUE	FALSE	curated	FALSE	0.514	2046	1496	0.102	0.451	2834
CPI-SS0F15C1AB3	NRP2_SEMA3F	simple:O60462	simple:Q13275	ENSG00000118257	ENSG00000001617	TRUE	TRUE	FALSE	curated	FALSE	0	0.088	1095	0.296	1278	2474
CPI-SS0241A1F57	NRP2_SEMA3C	simple:O60462	simple:Q99985	ENSG00000118257	ENSG00000075223	TRUE	TRUE	FALSE	curated	FALSE	0	0	1095	0.296	1024	0.995
CPI-SS0714977CA	BDNF_GPR152	simple:P23560	simple:Q8TDT2	ENSG00000176697	ENSG00000175514	TRUE	FALSE	TRUE	IMEx,IntAct	FALSE	1638	0	1463	0.347	NA	NA
CPI-SS0EAB03260	CD1D_LILRB2	simple:P15813	simple:Q8N423	ENSG00000158473	ENSG00000274513	FALSE	FALSE	TRUE	curated	FALSE	0	0	1463	0.347	1059	0.689
CPI-SS00AD71822	CCK_CCKBR	simple:P06307	simple:P32239	ENSG00000187094	ENSG00000110148	TRUE	FALSE	TRUE	guidetopharmacology.org	FALSE	0.414	0.293	2581	0.302	1206	0.674
CPI-SS0B01D306C	CCL5_CCR5	simple:P13501	simple:P51681	ENSG00000274233	ENSG00000160791	TRUE	FALSE	TRUE	curated	FALSE	0	0	2279	0.302	NA	NA
CPI-SS03105D292	CSF1_SLC7A1	simple:P09603	simple:P30825	ENSG00000184371	ENSG00000139514	TRUE	FALSE	TRUE	I2D	FALSE	0	0.346	1878	0.497	0.583	1903
CPI-SS0E41702C1	IGF1_IGF1R	simple:P05019	simple:P08069	ENSG00000017427	ENSG00000140443	TRUE	FALSE	TRUE	curated	FALSE	0	1925	1878	0.497	0	0.332
CPI-SS0BA601DC4	BDNF_NTRK2	simple:P23560	simple:Q16620	ENSG00000176697	ENSG00000148053	TRUE	FALSE	TRUE	curated	FALSE	1766	0	1026	0.43	1653	3011
CPI-SS093E05DD4	NTF3_NTRK2	simple:P20783	simple:Q16620	ENSG00000185652	ENSG00000148053	TRUE	FALSE	TRUE	curated	FALSE	0.582	0	1026	0.43	NA	NA
CPI-SS09A36B221	BDNF_SORT1	simple:P23560	simple:Q99523	ENSG00000176697	ENSG00000134243	TRUE	FALSE	TRUE	I2D,IMEx,InnateDB-All,IntAct	FALSE	1867	0	1926	0.356	2103	3483
CPI-SS07CCAD9BF	GRN_SORT1	simple:P28799	simple:Q99523	ENSG00000030582	ENSG00000134243	TRUE	FALSE	TRUE	IMEx,InnateDB-All,MINT	FALSE	0.997	2798	1186	0.377	1435	1226
CPI-SS04F3A1E5C	COPA_SORT1	simple:P53621	simple:Q99523	ENSG00000122218	ENSG00000134243	TRUE	FALSE	TRUE	IMEx,InnateDB-All,IntAct,MatrixDB	FALSE	1627	2936	2469	0.356	0.384	1865
CPI-SS03F0B666C	BDNF_F11R	simple:P23560	simple:Q9Y624	ENSG00000176697	ENSG00000158769	TRUE	FALSE	TRUE	IMEx,InnateDB-All,IntAct	FALSE	1905	0	1186	0.377	0.26	1205
CPI-SC0859FAC25	IFNE_Type I IFNR	simple:Q86WN2	complex:Type I IFNR	ENSG00000184995		TRUE	FALSE	TRUE	curated	FALSE	0	0	0.981	0.482	3194	0.211
CPI-SC0E16B866E	IFNW1_Type I IFNR	simple:P05000	complex:Type I IFNR	ENSG00000177047		TRUE	FALSE	TRUE	curated	FALSE	0	0	0.981	0.482	1.38	2607
CPI-SC0EC4B9BBD	IFNA4_Type I IFNR	simple:P05014	complex:Type I IFNR	ENSG00000236637		TRUE	FALSE	TRUE	curated	FALSE	0	0.55	1881	0.408	NA	NA
CPI-SS02A0FF87F	FAM3C_CLEC2D	simple:Q92520	simple:Q9UHP7	ENSG00000196937	ENSG00000069493	TRUE	FALSE	TRUE	IMEx,InnateDB-All,IntAct	FALSE	1.85	1.44	1142	0.428	0.531	0
CPI-SS0BD9F32BA	LGALS9_DAG1	simple:O00182	simple:Q14118	ENSG00000168961	ENSG00000173402	TRUE	FALSE	TRUE	InnateDB-All	FALSE	2353	1627	2425	0.408	0.471	1203
CPI-SS04A5D6B6F	DLL1_NOTCH1	simple:O00548	simple:P46531	ENSG00000275555	ENSG00000148400	FALSE	FALSE	TRUE	curated	FALSE	0.293	0	1142	0.428	NA	NA
CPI-SS0AB21032D	PLXNB2_SEMA4C	simple:O15031	simple:Q9C0C4	ENSG00000196576	ENSG00000168758	FALSE	TRUE	TRUE	curated	FALSE	0	0	0.984	0	0.471	0.483
CPI-SS0D883FFF1	VEGFD_FLT4	simple:O43915	simple:P35916	ENSG00000165197	ENSG00000037280	TRUE	FALSE	TRUE	curated	FALSE	0	0	0.984	0	NA	NA
CPI-SS0DEDA3567	TNFSF10_RIPK1	simple:P50591	simple:Q13546	ENSG00000121858	ENSG00000137275	TRUE	FALSE	TRUE	InnateDB-All	FALSE	0	0.063	1884	0	NA	NA
CPI-SS00F4DDF4B	PTN_PTPRS	simple:P21246	simple:Q13332	ENSG00000105894	ENSG00000105426	TRUE	FALSE	TRUE	I2D,IMEx,InnateDB-All,IntAct	FALSE	3.02	0.495	1144	0	0.252	0.317
CPI-SS07F015051	CCR6_CCL20	simple:P51684	simple:P78556	ENSG00000112486	ENSG00000115009	TRUE	TRUE	FALSE	curated	FALSE	0.072	0	2427	0	0.2	0
CPI-SS0DBA4D668	DPP4_CXCL12	simple:P27487	simple:P48061	ENSG00000197635	ENSG00000107562	TRUE	TRUE	FALSE	curated	FALSE	0	0	1144	0	0.407	0
CPI-SS07155793F	ACKR3_CXCL12	simple:P25106	simple:P48061	ENSG00000144476	ENSG00000107562	TRUE	TRUE	FALSE	guidetopharmacology.org	FALSE	0.192	0	1.15	0	0	0
CPI-SS0AA47D179	TNFRSF13B_CD70	simple:O14836	simple:P32970	ENSG00000240505	ENSG00000125726	TRUE	TRUE	FALSE	InnateDB-All	FALSE	0	0.083	1.15	0	1791	1674
CPI-SS0D4BF6CA3	CD27_CD70	simple:P26842	simple:P32970	ENSG00000139193	ENSG00000125726	TRUE	TRUE	FALSE	curated	FALSE	0	0.222	2.05	0	0.614	2282
CPI-SS05834E385	CD40_INSL3	simple:P25942	simple:P51460	ENSG00000101017	ENSG00000248099	TRUE	TRUE	FALSE	I2D	FALSE	0	0.342	1.31	0	NA	NA
CPI-CS0DEBE7B69	IL1 receptor_IL1RN	complex:IL1 receptor	simple:P18510		ENSG00000136689	TRUE	TRUE	FALSE	curated	FALSE	0.35	0.197	2593	0	0.579	2374
CPI-CS085E95BC1	IL1 receptor inhibitor_IL1RN	complex:IL1 receptor inhibitor	simple:P18510		ENSG00000136689	TRUE	TRUE	FALSE	curated	FALSE	0.571	0.197	1.31	0	1799	0.723
CPI-CS00BF6CD40	IL13 receptor_IL4	complex:IL13 receptor	simple:P05112		ENSG00000113520	TRUE	TRUE	FALSE	curated	FALSE	0	0	1301	0	0.421	0
CPI-CS0FBBCDD66	IL4 receptor_IL4	complex:IL4 receptor	simple:P05112		ENSG00000113520	TRUE	TRUE	FALSE	curated	FALSE	0	0	1301	0	NA	NA
CPI-CS06E556972	IL15 receptor_IL15	complex:IL15 receptor	simple:P40933		ENSG00000164136	TRUE	TRUE	FALSE	curated	FALSE	0.227	0	2201	0	NA	NA
CPI-CS0BA342294	IL17 receptor AE_IL17C	complex:IL17 receptor AE	simple:Q9P0M4		ENSG00000124391	TRUE	TRUE	FALSE	curated	FALSE	0.064	0.343	1461	0	0.254	0
CPI-SS01BCB9360	NCAM1_BDNF	simple:P13591	simple:P23560	ENSG00000149294	ENSG00000176697	TRUE	TRUE	FALSE	I2D	FALSE	0	2.18	2744	0	3281	1845
CPI-SS07D71C546	NOTCH2_IL24	simple:Q04721	simple:Q13007	ENSG00000134250	ENSG00000162892	TRUE	TRUE	FALSE	IMEx,InnateDB-All,MINT	FALSE	0.198	0	1461	0	2053	0.449
CPI-SS027CDEA08	NOTCH2_DLL4	simple:Q04721	simple:Q9NR61	ENSG00000134250	ENSG00000128917	FALSE	TRUE	FALSE	curated	FALSE	0.165	0	1009	2592	2091	1461
CPI-SS012B7C21D	NOTCH1_DLL4	simple:P46531	simple:Q9NR61	ENSG00000148400	ENSG00000128917	FALSE	TRUE	FALSE	curated	FALSE	0	0	1605	2261	2053	0.356
CPI-SS00D153A8A	NOTCH4_DLL4	simple:Q99466	simple:Q9NR61	ENSG00000238196	ENSG00000128917	FALSE	TRUE	FALSE	curated	FALSE	0.469	0	1512	0	0.08	0
CPI-SS003C9A532	NOTCH2_DLL3	simple:Q04721	simple:Q9NYJ7	ENSG00000134250	ENSG00000090932	FALSE	TRUE	FALSE	curated	FALSE	0	3741	1211	0	0.119	0
CPI-SS0607D1101	NOTCH1_DLL3	simple:P46531	simple:Q9NYJ7	ENSG00000148400	ENSG00000090932	FALSE	TRUE	FALSE	curated	FALSE	0	2014	1.89	0.559	0.08	0
CPI-SS09D379E5B	NOTCH4_DLL3	simple:Q99466	simple:Q9NYJ7	ENSG00000238196	ENSG00000090932	FALSE	TRUE	FALSE	curated	FALSE	0	2025	1589	0.559	0.785	0
CPI-SS02770D68F	NOTCH2_JAG2	simple:Q04721	simple:Q9Y219	ENSG00000134250	ENSG00000184916	FALSE	TRUE	FALSE	curated	FALSE	0.198	2.21	2428	0.597	1.11	0.473
CPI-SS08C3D27F7	NOTCH1_JAG2	simple:P46531	simple:Q9Y219	ENSG00000148400	ENSG00000184916	FALSE	TRUE	FALSE	curated	FALSE	0	0.483	1277	0	1148	1485
CPI-SS05FEE05CB	NOTCH4_JAG2	simple:Q99466	simple:Q9Y219	ENSG00000238196	ENSG00000184916	FALSE	TRUE	FALSE	curated	FALSE	0.502	0.494	1151	0	1815	0.473
CPI-SS0C4D54E39	NOTCH3_JAG2	simple:Q9UM47	simple:Q9Y219	ENSG00000074181	ENSG00000184916	FALSE	TRUE	FALSE	curated	FALSE	0	0.563	0	0.14	0	0.419
CPI-SS0B87FE6E0	NOTCH1_JAG1	simple:P46531	simple:P78504	ENSG00000148400	ENSG00000101384	FALSE	TRUE	FALSE	curated	FALSE	0	2707	0	0	0.251	2621
CPI-SS01A07768A	CD46_JAG1	simple:P15529	simple:P78504	ENSG00000117335	ENSG00000101384	FALSE	TRUE	FALSE	curated	FALSE	1511	4356	0	0	0.251	1798
CPI-SS0A34EE366	NOTCH1_DLK1	simple:P46531	simple:P80370	ENSG00000148400	ENSG00000185559	FALSE	TRUE	FALSE	curated	FALSE	0	0	0	0	0.251	1.74
CPI-CC051643E98	IL23_IL23 receptor	complex:IL23	complex:IL23 receptor			TRUE	FALSE	TRUE	curated	FALSE	0	0	0	2584	0.251	1616
CPI-CS0C59AF029	IL33 receptor_IL33	complex:IL33 receptor	simple:O95760		ENSG00000137033	TRUE	TRUE	FALSE	curated	FALSE	0	0	1078	2334	0.251	1733
CPI-CS0A6AB5149	IL36 receptor_IL36B	complex:IL36 receptor	simple:Q9NZH7		ENSG00000136696	TRUE	TRUE	FALSE	curated	FALSE	0	0	0.466	2571	NA	NA
CPI-CS0AB9C7139	IL7 receptor_IL7	complex:IL7 receptor	simple:P13232		ENSG00000104432	TRUE	TRUE	FALSE	curated	FALSE	0	0	0	1295	NA	NA
CPI-CS06B657CAB	IL9 receptor_IL9	complex:IL9 receptor	simple:P15248		ENSG00000145839	TRUE	TRUE	FALSE	curated	FALSE	0	0	0	1887	NA	NA
CPI-CS07557A266	MIS receptor 1_AMH	complex:MIS receptor 1	simple:P03971		ENSG00000104899	TRUE	TRUE	FALSE	curated	FALSE	1068	0	0	0	0.387	0
CPI-CS0F670E8BC	MIS receptor 2_AMH	complex:MIS receptor 2	simple:P03971		ENSG00000104899	TRUE	TRUE	FALSE	curated	FALSE	1068	0	0	0	0.251	0.248
CPI-CS0D4BB4458	MIS receptor 3_AMH	complex:MIS receptor 3	simple:P03971		ENSG00000104899	TRUE	TRUE	FALSE	curated	FALSE	1068	0	0.082	0	0.807	0
CPI-CS040AEB4A0	NODAL receptor_NODAL	complex:NODAL receptor	simple:Q96S42		ENSG00000156574	TRUE	TRUE	FALSE	curated	FALSE	1531	1288	0	0.615	0	0
CPI-SS030EDC420	FZD9_WNT7A	simple:O00144	simple:O00755	ENSG00000188763	ENSG00000154764	TRUE	TRUE	FALSE	I2D	FALSE	0.072	0	0.84	0.229	NA	NA
CPI-SS0B7BC0E4D	CCL24_CCR2	simple:O00175	simple:P41597	ENSG00000106178	ENSG00000121807	TRUE	FALSE	TRUE	guidetopharmacology.org	FALSE	0.332	0	0	1642	NA	NA
CPI-SS0CF0E4DE9	CCL2_CCR2	simple:P13500	simple:P41597	ENSG00000108691	ENSG00000121807	TRUE	FALSE	TRUE	curated	FALSE	0.072	0	0	1375	1189	0
CPI-SS0B0AC1603	CCL24_CCR3	simple:O00175	simple:P51677	ENSG00000106178	ENSG00000183625	TRUE	FALSE	TRUE	curated	FALSE	0	0	0	1336	NA	NA
CPI-SS0F6B529A1	CCL5_CCR3	simple:P13501	simple:P51677	ENSG00000274233	ENSG00000183625	TRUE	FALSE	TRUE	curated	FALSE	0	0.548	1097	1364	0	0.297
CPI-SS0C6311D2D	CCL3L3_CCR3	simple:P16619	simple:P51677	ENSG00000277796	ENSG00000183625	TRUE	FALSE	TRUE	curated	FALSE	0	0.728	0	0	0	2021
CPI-SS0A021DB6E	CCL5_CCR1	simple:P13501	simple:P32246	ENSG00000274233	ENSG00000163823	TRUE	FALSE	TRUE	curated	FALSE	0	0	0.38	0	NA	NA
CPI-SS0817CE2B3	CCL3L3_CCR1	simple:P16619	simple:P32246	ENSG00000277796	ENSG00000163823	TRUE	FALSE	TRUE	curated	FALSE	0	0	0	1.37	NA	NA
CPI-SS0F3BF2B34	CCL5_ACKR4	simple:P13501	simple:Q9NPB9	ENSG00000274233	ENSG00000129048	TRUE	FALSE	TRUE	I2D	FALSE	0	0.522	NA	NA	0	2.15
CPI-SS0CCD89E02	CCL25_ACKR4	simple:O15444	simple:Q9NPB9	ENSG00000131142	ENSG00000129048	TRUE	FALSE	TRUE	curated	FALSE	0	0.544	NA	NA	0	2026
CPI-SS04641FE5F	CCL3L3_DPP4	simple:P16619	simple:P27487	ENSG00000277796	ENSG00000197635	TRUE	FALSE	TRUE	I2D	FALSE	0	0	0.425	1221	1506	3318
CPI-SS0AEC33FF1	CCL22_DPP4	simple:O00626	simple:P27487	ENSG00000102962	ENSG00000197635	TRUE	FALSE	TRUE	curated	FALSE	0	0	0	1064	NA	NA
CPI-SS0CC738ABC	CXCL11_DPP4	simple:O14625	simple:P27487	ENSG00000169248	ENSG00000197635	TRUE	FALSE	TRUE	curated	FALSE	0.414	0	0	0.873	NA	NA
CPI-SS018B35889	GIP_DPP4	simple:P09681	simple:P27487	ENSG00000159224	ENSG00000197635	TRUE	FALSE	TRUE	InnateDB-All,MINT	FALSE	0	0	0	0	NA	NA
CPI-SS0652F5D15	NPPB_DPP4	simple:P16860	simple:P27487	ENSG00000120937	ENSG00000197635	TRUE	FALSE	TRUE	InnateDB-All,MINT	FALSE	0	0	0	0.539	0	3235
CPI-SS0D377BBBF	ADCYAP1_DPP4	simple:P18509	simple:P27487	ENSG00000141433	ENSG00000197635	TRUE	FALSE	TRUE	InnateDB-All,MINT	FALSE	0	0	0.133	0.475	NA	NA
CPI-SS07AB1C381	PPBP_CXCR1	simple:P02775	simple:P25024	ENSG00000163736	ENSG00000163464	TRUE	FALSE	TRUE	curated	FALSE	0.462	0	3473	0.538	NA	NA
CPI-SS015B2F961	CALCA_CALCR	simple:P01258	simple:P30988	ENSG00000110680	ENSG00000004948	TRUE	FALSE	TRUE	guidetopharmacology.org	FALSE	0	0.165	0.14	0	1834	1443
CPI-SS0F531DDEB	CALCA_CALCR	simple:P06881	simple:P30988	ENSG00000110680	ENSG00000004948	TRUE	FALSE	TRUE	guidetopharmacology.org	FALSE	0	0.165	1227	0	1309	2155
CPI-SS07CF0C6E7	CALCB_CALCR	simple:P10092	simple:P30988	ENSG00000175868	ENSG00000004948	TRUE	FALSE	TRUE	guidetopharmacology.org	FALSE	0	0.164	0	0	1846	2.53
CPI-SS0747FCACD	CXCL11_ACKR3	simple:O14625	simple:P25106	ENSG00000169248	ENSG00000144476	TRUE	FALSE	TRUE	guidetopharmacology.org	FALSE	0.888	0.189	0	0	NA	NA
CPI-SS02CCE14A7	ADCYAP1_VIPR2	simple:P18509	simple:P41587	ENSG00000141433	ENSG00000106018	TRUE	FALSE	TRUE	I2D	FALSE	0	0.611	0	0	NA	NA
CPI-SS023D39112	NPPB_NPR3	simple:P16860	simple:P17342	ENSG00000120937	ENSG00000113389	TRUE	FALSE	TRUE	I2D,InnateDB-All	FALSE	0	0.395	0.498	0.719	1377	0.348
CPI-SS0779676D0	NPPB_NPR2	simple:P16860	simple:P20594	ENSG00000120937	ENSG00000159899	TRUE	FALSE	TRUE	I2D,InnateDB-All	FALSE	0	0	0.752	0	0	0
CPI-SS0098B5107	ADCYAP1_SCTR	simple:P18509	simple:P47872	ENSG00000141433	ENSG00000080293	TRUE	FALSE	TRUE	I2D,InnateDB-All	FALSE	0	0.407	0.875	0.417	NA	NA
CPI-SS0133239EA	ADCYAP1_ADCYAP1R1	simple:P18509	simple:P41586	ENSG00000141433	ENSG00000078549	TRUE	FALSE	TRUE	I2D,IMEx	FALSE	0	0.635	0.875	0	NA	NA
CPI-SS0BC7CD11B	LGALS9_MET	simple:O00182	simple:P08581	ENSG00000168961	ENSG00000105976	TRUE	FALSE	TRUE	InnateDB-All	FALSE	0.293	0	0	0	0	0.384
CPI-SS0419B80C4	LGALS9_LRP1	simple:O00182	simple:Q07954	ENSG00000168961	ENSG00000123384	TRUE	FALSE	TRUE	InnateDB-All	FALSE	1111	0	0.166	0	0	0.348
CPI-SS02928C71A	PDGFB_LRP1	simple:P01127	simple:Q07954	ENSG00000100311	ENSG00000123384	TRUE	FALSE	TRUE	I2D,InnateDB-All	FALSE	0	0	0.486	0	0	0.31
CPI-SS006C6537E	MDK_LRP1	simple:P21741	simple:Q07954	ENSG00000110492	ENSG00000123384	TRUE	FALSE	TRUE	I2D,InnateDB-All	FALSE	1112	0	0	0.308	0	0.384
CPI-SS0984C2931	WNT3A_LRP1	simple:P56704	simple:Q07954	ENSG00000154342	ENSG00000123384	TRUE	FALSE	TRUE	I2D	FALSE	0	0	0.3	0.251	0	0.402
CPI-SS014958F32	LGALS9_CD47	simple:O00182	simple:Q08722	ENSG00000168961	ENSG00000196776	TRUE	FALSE	TRUE	InnateDB-All	FALSE	2256	1549	0.04	0.354	0	0.165
CPI-SS0339AE950	SIRPA_CD47	simple:P78324	simple:Q08722	ENSG00000198053	ENSG00000196776	FALSE	TRUE	TRUE	curated	FALSE	3381	1446	0	0.233	2.4	0.556
CPI-SS0A9FB762A	LGALS9_PTPRK	simple:O00182	simple:Q15262	ENSG00000168961	ENSG00000273993	TRUE	FALSE	TRUE	InnateDB-All	FALSE	1051	3242	0.129	0.082	0.245	0
CPI-SS0472C478C	BMP7_PTPRK	simple:P18075	simple:Q15262	ENSG00000101144	ENSG00000273993	TRUE	FALSE	TRUE	InnateDB-All	FALSE	1127	3081	0	2058	0	1633
CPI-SS0CB863B46	WNT5A_PTPRK	simple:P41221	simple:Q15262	ENSG00000114251	ENSG00000273993	TRUE	FALSE	TRUE	InnateDB-All	FALSE	1794	3297	0	2012	0.26	0
CPI-SS002DF6C31	LGALS9_SLC1A5	simple:O00182	simple:Q15758	ENSG00000168961	ENSG00000105281	TRUE	FALSE	TRUE	I2D,InnateDB-All	FALSE	0.988	2301	0	1888	2195	0
CPI-SS08877A081	LGALS9_COLEC12	simple:O00182	simple:Q5KU26	ENSG00000168961	ENSG00000158270	TRUE	FALSE	TRUE	InnateDB-All	FALSE	0	0.946	0	0.66	0	1802
CPI-SS0E23CEB91	LGALS9_HAVCR2	simple:O00182	simple:Q8TDQ0	ENSG00000168961	ENSG00000135077	TRUE	FALSE	TRUE	curated	FALSE	0.424	0	0.306	0.479	0	0
CPI-SS09C52F54E	LGALS9_SORL1	simple:O00182	simple:Q92673	ENSG00000168961	ENSG00000137642	TRUE	FALSE	TRUE	InnateDB-All	FALSE	1178	0.642	0	0.189	0.262	0
CPI-SS083CBFACD	MDK_SORL1	simple:P21741	simple:Q92673	ENSG00000110492	ENSG00000137642	TRUE	FALSE	TRUE	InnateDB-All	FALSE	1179	1757	3565	2075	0	0
CPI-SS048346C2B	LGALS9_MRC2	simple:O00182	simple:Q9UBG0	ENSG00000168961	ENSG00000011028	TRUE	FALSE	TRUE	InnateDB-All	FALSE	0.612	0	0	0.137	0	0
CPI-SS0014DB67C	CER1_MRC2	simple:O95813	simple:Q9UBG0	ENSG00000147869	ENSG00000011028	TRUE	FALSE	TRUE	InnateDB-All	FALSE	0.943	0	0	0.422	NA	NA
CPI-SS05A26A1DE	PDGFB_PDGFRB	simple:P01127	simple:P09619	ENSG00000100311	ENSG00000113721	TRUE	FALSE	TRUE	curated	FALSE	0	0	0.786	0.685	0.107	0
CPI-SS0FEEB187C	PDGFB_PDGFRA	simple:P01127	simple:P16234	ENSG00000100311	ENSG00000134853	TRUE	FALSE	TRUE	curated	FALSE	0	0	0	0.563	0	0
CPI-SS0B70EB09E	PDGFA_PDGFRA	simple:P04085	simple:P16234	ENSG00000197461	ENSG00000134853	TRUE	FALSE	TRUE	curated	FALSE	0.58	0	0	0	0	0
CPI-SC033E22B14	PDGFB_PDGFR complex	simple:P01127	complex:PDGFR complex	ENSG00000100311		TRUE	FALSE	TRUE	curated	FALSE	0	0	0.252	0	0	0.274
CPI-SS0CB4F2FE4	PDGFB_ADGRV1	simple:P01127	simple:Q8WXG9	ENSG00000100311	ENSG00000164199	TRUE	FALSE	TRUE	InnateDB-All	FALSE	0	1679	0	0	0.365	0
CPI-SS03D887978	IFNE_ADGRV1	simple:Q86WN2	simple:Q8WXG9	ENSG00000184995	ENSG00000164199	TRUE	FALSE	TRUE	InnateDB-All	FALSE	0.491	0	0.365	0	0	0
CPI-SS027E12A36	MDK_PTPRZ1	simple:P21741	simple:P23471	ENSG00000110492	ENSG00000106278	TRUE	FALSE	FALSE	curated	FALSE	0.314	0	0	0.544	0.111	0
CPI-SS04E690D72	PTN_PTPRZ1	simple:P21246	simple:P23471	ENSG00000105894	ENSG00000106278	TRUE	FALSE	FALSE	curated	FALSE	2.96	0	0.243	0.807	0	0.423
CPI-SS012AFC842	MDK_ALK	simple:P21741	simple:Q9UM73	ENSG00000110492	ENSG00000171094	TRUE	FALSE	TRUE	curated	FALSE	0.339	1.79	0.356	0.544	0.366	0.286
CPI-SS05D7900BF	PTN_ALK	simple:P21246	simple:Q9UM73	ENSG00000105894	ENSG00000171094	TRUE	FALSE	TRUE	curated	FALSE	2986	0.621	0	0.357	0	0.412
CPI-SS080C0EEB8	WNT3A_FZD1	simple:P56704	simple:Q9UP38	ENSG00000154342	ENSG00000157240	TRUE	FALSE	TRUE	I2D,InnateDB-All	FALSE	0	0.064	0.319	1565	0	0.316
CPI-SS0B2D5BA95	WNT5A_FZD1	simple:P41221	simple:Q9UP38	ENSG00000114251	ENSG00000157240	TRUE	FALSE	TRUE	curated	FALSE	1.17	0.284	0.319	1321	0.102	0
CPI-SS0E7523314	WNT3_FZD1	simple:P56703	simple:Q9UP38	ENSG00000277641	ENSG00000157240	TRUE	FALSE	TRUE	I2D	FALSE	0	0.167	0.319	1565	0.274	1334
CPI-SS0D81C6C1D	WNT7B_FZD1	simple:P56706	simple:Q9UP38	ENSG00000188064	ENSG00000157240	TRUE	FALSE	TRUE	curated	FALSE	0	0.06	0.319	1506	0.274	1477
CPI-SS0261EA048	WNT3A_FZD2	simple:P56704	simple:Q14332	ENSG00000154342	ENSG00000180340	TRUE	FALSE	TRUE	InnateDB-All	FALSE	0	0	NA	NA	0.191	0
CPI-SS01C2BA5C8	WNT5A_FZD2	simple:P41221	simple:Q14332	ENSG00000114251	ENSG00000180340	TRUE	FALSE	TRUE	curated	FALSE	1067	0	NA	NA	0.16	0
CPI-SS0E32BEF02	WNT5A_FZD5	simple:P41221	simple:Q13467	ENSG00000114251	ENSG00000163251	TRUE	FALSE	TRUE	curated	FALSE	1233	1231	0.319	1565	0	0
CPI-SS05550A895	WNT7A_FZD5	simple:O00755	simple:Q13467	ENSG00000154764	ENSG00000163251	TRUE	FALSE	TRUE	curated	FALSE	0	1019	0	0	NA	NA
CPI-SS0D4F593F1	WNT5A_EPHA7	simple:P41221	simple:Q15375	ENSG00000114251	ENSG00000135333	TRUE	FALSE	TRUE	InnateDB-All	FALSE	1352	0	0	0	0.531	0
CPI-SS03E450F99	EFNA1_EPHA7	simple:P20827	simple:Q15375	ENSG00000169242	ENSG00000135333	TRUE	FALSE	TRUE	curated	FALSE	0.705	0	0.518	0	NA	NA
CPI-SS0D5DBB634	EFNA3_EPHA7	simple:P52797	simple:Q15375	ENSG00000143590	ENSG00000135333	FALSE	FALSE	TRUE	curated	FALSE	0.644	0	0.107	0	0.148	0
CPI-SS0F81DBF22	EFNA4_EPHA7	simple:P52798	simple:Q15375	ENSG00000243364	ENSG00000135333	TRUE	FALSE	TRUE	curated	FALSE	0	0	0.032	0	0.465	0
CPI-SS028688B7B	EFNA5_EPHA7	simple:P52803	simple:Q15375	ENSG00000184349	ENSG00000135333	FALSE	FALSE	TRUE	curated	FALSE	1	0	0.073	0	0	0
CPI-SS0C56C483F	WNT5A_ANTXR1	simple:P41221	simple:Q9H6X2	ENSG00000114251	ENSG00000169604	TRUE	FALSE	TRUE	InnateDB-All	FALSE	1401	0.681	0	0	0	0
CPI-SS0331C5A49	GDF11_ANTXR1	simple:O95390	simple:Q9H6X2	ENSG00000135414	ENSG00000169604	TRUE	FALSE	TRUE	InnateDB-All	FALSE	0.584	0.655	0	0	0	2152
CPI-SS0E7CBFD03	WNT5A_ROR2	simple:P41221	simple:Q01974	ENSG00000114251	ENSG00000169071	TRUE	FALSE	TRUE	I2D	FALSE	1101	0.734	1.58	0	NA	NA
CPI-SS002673EFE	WNT5A_FZD3	simple:P41221	simple:Q9NPG1	ENSG00000114251	ENSG00000104290	TRUE	FALSE	TRUE	curated	FALSE	1443	2698	0	0	0	0.989
CPI-SS073F3FAD5	WNT5A_ROR1	simple:P41221	simple:Q01973	ENSG00000114251	ENSG00000185483	TRUE	FALSE	TRUE	IMEx	FALSE	1044	0.357	0	0	0	0.881
CPI-SS0179FBFD3	TNFRSF10A_TNFSF10	simple:O00220	simple:P50591	ENSG00000104689	ENSG00000121858	TRUE	TRUE	FALSE	curated	FALSE	0.063	0	0.163	0.111	NA	NA
CPI-SS0AD0ED887	TNFRSF11B_TNFSF10	simple:O00300	simple:P50591	ENSG00000164761	ENSG00000121858	TRUE	FALSE	FALSE	curated	FALSE	1959	0	0.163	0.182	NA	NA
CPI-SS0898D7F7F	TNFRSF10B_TNFSF10	simple:O14763	simple:P50591	ENSG00000120889	ENSG00000121858	TRUE	TRUE	FALSE	curated	FALSE	1661	0	0	0	NA	NA
CPI-SS039799099	FGFR1_NCAM1	simple:P11362	simple:P13591	ENSG00000077782	ENSG00000149294	TRUE	TRUE	TRUE	curated	FALSE	2057	1594	0.706	0.194	0.544	1505
CPI-SS038E93B77	FGFR1_FGF9	simple:P11362	simple:P31371	ENSG00000077782	ENSG00000102678	TRUE	TRUE	FALSE	I2D,InnateDB-All	FALSE	0	2859	0	0	0	0.342
CPI-SS0907A7598	FGFR2_FGF9	simple:P21802	simple:P31371	ENSG00000066468	ENSG00000102678	TRUE	TRUE	FALSE	I2D,InnateDB-All	FALSE	0	2237	0	0	0	0.234
CPI-SS0649EA05F	FGFR4_FGF9	simple:P22455	simple:P31371	ENSG00000160867	ENSG00000102678	TRUE	TRUE	FALSE	I2D	FALSE	0	2239	0	0	0	0.379
CPI-SS07A9A501C	FGFR3_FGF9	simple:P22607	simple:P31371	ENSG00000068078	ENSG00000102678	TRUE	TRUE	FALSE	I2D,InnateDB-All	FALSE	0	2216	0	0	NA	NA
CPI-SS07A0F4D73	FGFR1_FGF23	simple:P11362	simple:Q9GZV9	ENSG00000077782	ENSG00000118972	TRUE	TRUE	FALSE	IMEx,InnateDB-All	FALSE	0	0.758	0	0	NA	NA
CPI-SS01D785DBA	FGFR2_FGF23	simple:P21802	simple:Q9GZV9	ENSG00000066468	ENSG00000118972	TRUE	TRUE	FALSE	I2D,IMEx,InnateDB-All,IntAct	FALSE	0	0.135	0	0	NA	NA
CPI-SS0883B7EE4	FGFR3_FGF23	simple:P22607	simple:Q9GZV9	ENSG00000068078	ENSG00000118972	TRUE	TRUE	FALSE	I2D	FALSE	0	0.114	0	0	NA	NA
CPI-SS06A0B20BD	FGFR2_EPHA4	simple:P21802	simple:P54764	ENSG00000066468	ENSG00000116106	TRUE	TRUE	TRUE	I2D,InnateDB-All	FALSE	1509	1968	0	2065	0	0.277
CPI-SS0EBFE1854	EFNA1_EPHA4	simple:P20827	simple:P54764	ENSG00000169242	ENSG00000116106	TRUE	FALSE	TRUE	curated	FALSE	0.524	1893	0	2129	NA	NA
CPI-SS05B4EB419	EFNA3_EPHA4	simple:P52797	simple:P54764	ENSG00000143590	ENSG00000116106	FALSE	FALSE	TRUE	curated	FALSE	0.463	0	0	2268	0.728	0.166
CPI-SS0659DBE72	EFNA4_EPHA4	simple:P52798	simple:P54764	ENSG00000243364	ENSG00000116106	TRUE	FALSE	TRUE	curated	FALSE	0	2057	0	2121	0	2462
CPI-SS0FC01B947	EFNA5_EPHA4	simple:P52803	simple:P54764	ENSG00000184349	ENSG00000116106	FALSE	FALSE	TRUE	curated	FALSE	0.819	0	0	2895	0.417	3971
CPI-SS087E0E3FB	EFNB2_EPHA4	simple:P52799	simple:P54764	ENSG00000125266	ENSG00000116106	FALSE	TRUE	TRUE	curated	FALSE	1927	0	1045	3062	0	0
CPI-SS0816A4ED4	FGFR4_EPHA4	simple:P22455	simple:P54764	ENSG00000160867	ENSG00000116106	TRUE	TRUE	TRUE	I2D,InnateDB-All	FALSE	0.208	1.97	0	0.72	0	0
CPI-SS0D1AE5C79	FGFR3_EPHA4	simple:P22607	simple:P54764	ENSG00000068078	ENSG00000116106	TRUE	TRUE	TRUE	I2D,InnateDB-All	FALSE	0	1947	1818	2642	NA	NA
CPI-SS00D9A0644	FGFR2_CD83	simple:P21802	simple:Q01151	ENSG00000066468	ENSG00000112149	TRUE	TRUE	TRUE	InnateDB-All	FALSE	1559	2.56	0.328	2443	0	0
CPI-SS02E314589	FGFR2_NECTIN1	simple:P21802	simple:Q15223	ENSG00000066468	ENSG00000110400	TRUE	TRUE	TRUE	InnateDB-All	FALSE	2561	1193	0.312	0	0	0
CPI-SS02C29C238	FGFR3_NECTIN1	simple:P22607	simple:Q15223	ENSG00000068078	ENSG00000110400	TRUE	TRUE	TRUE	InnateDB-All	FALSE	0	1172	2169	1764	NA	NA
CPI-SS03F821467	CD96_NECTIN1	simple:P40200	simple:Q15223	ENSG00000153283	ENSG00000110400	TRUE	TRUE	TRUE	curated	FALSE	0	1123	1782	1814	0	1348
CPI-SS0CC898553	FGFR2_PTPRR	simple:P21802	simple:Q15256	ENSG00000066468	ENSG00000153233	TRUE	TRUE	TRUE	InnateDB-All	FALSE	1373	2021	1509	1862	0	1.41
CPI-SS0658257AC	FGFR4_PTPRR	simple:P22455	simple:Q15256	ENSG00000160867	ENSG00000153233	TRUE	TRUE	TRUE	InnateDB-All	FALSE	0.072	2023	1603	0.611	0	0.866
CPI-SS098F416C1	FGFR2_XPR1	simple:P21802	simple:Q9UBH6	ENSG00000066468	ENSG00000143324	TRUE	TRUE	TRUE	InnateDB-All	FALSE	1683	1696	0	0.258	1.27	0
CPI-SS0B8083B44	WNT7B_FZD4	simple:P56706	simple:Q9ULV1	ENSG00000188064	ENSG00000174804	TRUE	FALSE	TRUE	curated	FALSE	0	0.842	0	0.38	0	0
CPI-SS01469637C	WNT2B_FZD4	simple:Q93097	simple:Q9ULV1	ENSG00000134245	ENSG00000174804	TRUE	FALSE	TRUE	curated	FALSE	0.214	0.978	0	0.298	0	0
CPI-SS0423580E5	DLL1_NOTCH2	simple:O00548	simple:Q04721	ENSG00000275555	ENSG00000134250	FALSE	FALSE	TRUE	curated	FALSE	2.02	0	0	0.298	NA	NA
CPI-SS060B82BBC	JAG1_NOTCH2	simple:P78504	simple:Q04721	ENSG00000101384	ENSG00000134250	FALSE	FALSE	TRUE	curated	FALSE	4434	0.163	0	0.314	0	0
CPI-SS0E1A8414D	DLK1_NOTCH2	simple:P80370	simple:Q04721	ENSG00000185559	ENSG00000134250	FALSE	FALSE	TRUE	curated	FALSE	0	0.186	0	0.27	0	0
CPI-SS0FB5FE587	DLL1_NOTCH4	simple:O00548	simple:Q99466	ENSG00000275555	ENSG00000238196	FALSE	FALSE	TRUE	curated	FALSE	0.304	0	0	0.253	NA	NA
CPI-SS0837E9F59	JAG1_NOTCH4	simple:P78504	simple:Q99466	ENSG00000101384	ENSG00000238196	FALSE	FALSE	TRUE	curated	FALSE	2718	0.467	0	0.282	0	0.949
CPI-SS0D37C7C70	DLK1_NOTCH4	simple:P80370	simple:Q99466	ENSG00000185559	ENSG00000238196	FALSE	FALSE	TRUE	curated	FALSE	0	0.49	0	0.349	0	1012
CPI-SS047232C64	DLL1_NOTCH3	simple:O00548	simple:Q9UM47	ENSG00000275555	ENSG00000074181	FALSE	FALSE	TRUE	curated	FALSE	0.373	0	0	0.28	NA	NA
CPI-SS0B99F22A2	JAG1_NOTCH3	simple:P78504	simple:Q9UM47	ENSG00000101384	ENSG00000074181	FALSE	FALSE	TRUE	curated	FALSE	2787	0	0	0.317	0	0
CPI-SS007AA9FDE	DLK1_NOTCH3	simple:P80370	simple:Q9UM47	ENSG00000185559	ENSG00000074181	FALSE	FALSE	TRUE	curated	FALSE	0	0	0	0.258	0	0
CPI-SS0938C6980	DLL4_NOTCH3	simple:Q9NR61	simple:Q9UM47	ENSG00000128917	ENSG00000074181	FALSE	FALSE	TRUE	curated	FALSE	0	0	0	0.271	0	0
CPI-SS035E5A708	DLL3_NOTCH3	simple:Q9NYJ7	simple:Q9UM47	ENSG00000090932	ENSG00000074181	FALSE	FALSE	TRUE	curated	FALSE	2094	0	0	0.258	0	0
CPI-SS0BFB29A42	PLXNB2_PTN	simple:O15031	simple:P21246	ENSG00000196576	ENSG00000105894	TRUE	TRUE	FALSE	I2D,IMEx,InnateDB-All,IntAct	FALSE	0	3248	0	0	0	0
CPI-SS08FAC0A55	PLXNB2_SEMA4D	simple:O15031	simple:Q92854	ENSG00000196576	ENSG00000187764	FALSE	TRUE	TRUE	curated	FALSE	0	1123	0	0	0	0.14
CPI-SS0CCCF7C69	PLXNB1_SEMA4D	simple:O43157	simple:Q92854	ENSG00000164050	ENSG00000187764	TRUE	TRUE	TRUE	curated	FALSE	0	0.934	0	0	0	0.211
CPI-SS06AA638A8	CD72_SEMA4D	simple:P21854	simple:Q92854	ENSG00000137101	ENSG00000187764	FALSE	FALSE	TRUE	curated	FALSE	0.416	0.823	0	0	0	0.122
CPI-SS0C0A61F92	PLXNB2_SEMA4G	simple:O15031	simple:Q9NTN9	ENSG00000196576	ENSG00000095539	FALSE	TRUE	FALSE	curated	FALSE	0	0.471	0	0.81	0	0.102
CPI-SS0EBA5A4D8	VEGFD_KDR	simple:O43915	simple:P35968	ENSG00000165197	ENSG00000128052	TRUE	FALSE	TRUE	curated	FALSE	0	0	0	0.892	NA	NA
CPI-SS0C03F7CDC	VEGFA_KDR	simple:P15692	simple:P35968	ENSG00000112715	ENSG00000128052	TRUE	FALSE	TRUE	curated	FALSE	0.527	0	2.23	1006	0	0
CPI-SS0C412B7DE	CD70_TNFRSF17	simple:P32970	simple:Q02223	ENSG00000125726	ENSG00000048462	TRUE	FALSE	TRUE	InnateDB-All	FALSE	0.072	0	0.481	0	NA	NA
CPI-SS095E52E66	TNFSF10_TNFRSF10D	simple:P50591	simple:Q9UBN6	ENSG00000121858	ENSG00000173530	TRUE	FALSE	TRUE	curated	FALSE	0	0	1024	1669	NA	NA
CPI-SS0A81A3626	WNT7A_LDLR	simple:O00755	simple:P01130	ENSG00000154764	ENSG00000130164	TRUE	FALSE	TRUE	InnateDB-All	FALSE	0	1638	0	1639	NA	NA
CPI-SS0FF49C823	EFNA1_EPHA1	simple:P20827	simple:P21709	ENSG00000169242	ENSG00000284816	TRUE	FALSE	TRUE	curated	FALSE	0.39	0.321	0.249	0.149	NA	NA
CPI-SS09CA492BA	EFNA1_EPHA3	simple:P20827	simple:P29320	ENSG00000169242	ENSG00000044524	TRUE	FALSE	TRUE	curated	FALSE	0.39	0	0.428	0.194	NA	NA
CPI-SS037E6BEDF	EFNA1_EPHA8	simple:P20827	simple:P29322	ENSG00000169242	ENSG00000070886	TRUE	FALSE	TRUE	curated	FALSE	0.399	0.25	0.172	0.221	NA	NA
CPI-SS0762B455F	EFNA1_EPHA5	simple:P20827	simple:P54756	ENSG00000169242	ENSG00000145242	TRUE	FALSE	TRUE	curated	FALSE	0.503	0	0	0.406	NA	NA
CPI-SS079EF5D9C	EFNA3_EPHA5	simple:P52797	simple:P54756	ENSG00000143590	ENSG00000145242	FALSE	FALSE	TRUE	curated	FALSE	0.442	0	0.783	0.38	0	0
CPI-SS0008137B6	EFNA4_EPHA5	simple:P52798	simple:P54756	ENSG00000243364	ENSG00000145242	TRUE	FALSE	TRUE	curated	FALSE	0	0	0	0.291	0	0
CPI-SS09E3F5044	EFNA5_EPHA5	simple:P52803	simple:P54756	ENSG00000184349	ENSG00000145242	FALSE	FALSE	TRUE	curated	FALSE	0.798	0	0.04	0	0	0.138
CPI-SC001669E22	GDF11_TGFR_AVR2A	simple:O95390	complex:TGFR_AVR2A	ENSG00000135414		TRUE	FALSE	TRUE	curated	FALSE	0.215	2015	0	0	0	0
CPI-SC017215F7F	GDF11_TGFR_AVR2B	simple:O95390	complex:TGFR_AVR2B	ENSG00000135414		TRUE	FALSE	TRUE	curated	FALSE	0.469	2162	0.257	0	0	0.331
CPI-SC098C06330	TGFB1_TGFbeta receptor1	simple:P01137	complex:TGFbeta receptor1	ENSG00000105329		TRUE	FALSE	TRUE	curated	FALSE	0	0	0	0	NA	NA
CPI-SC03DD946B2	TGFB2_TGFbeta receptor1	simple:P61812	complex:TGFbeta receptor1	ENSG00000092969		TRUE	FALSE	TRUE	curated	FALSE	0.064	0	0	0	NA	NA
CPI-SC0984894BC	TGFB1_TGFbeta receptor2	simple:P01137	complex:TGFbeta receptor2	ENSG00000105329		TRUE	FALSE	TRUE	curated	FALSE	0	0	0.303	0.13	NA	NA
CPI-SC032246C72	TGFB2_TGFbeta receptor2	simple:P61812	complex:TGFbeta receptor2	ENSG00000092969		TRUE	FALSE	TRUE	curated	FALSE	0.064	0	0	0.07	NA	NA
CPI-SS033A27302	LEFTY2_TDGF1	simple:O00292	simple:P13385	ENSG00000143768	ENSG00000241186	TRUE	FALSE	FALSE	curated	FALSE	1911	2417	0.245	0.885	0	0.267
CPI-SS0E9F84F1F	LEFTY1_TDGF1	simple:O75610	simple:P13385	ENSG00000243709	ENSG00000241186	TRUE	FALSE	FALSE	curated	FALSE	1513	1637	0	0.788	NA	NA
CPI-SS03165AD8C	ACKR2_CCL2	simple:O00590	simple:P13500	ENSG00000144648	ENSG00000108691	TRUE	TRUE	FALSE	curated	FALSE	0	1.01	0.196	0.166	0	0.267
CPI-SS0AE4CF4E7	ACKR2_CCL5	simple:O00590	simple:P13501	ENSG00000144648	ENSG00000274233	TRUE	TRUE	FALSE	curated	FALSE	0.53	0	0	0.068	0	0.447
CPI-SS073B0CE7A	ACKR2_CCL3L3	simple:O00590	simple:P16619	ENSG00000144648	ENSG00000277796	TRUE	TRUE	FALSE	I2D	FALSE	0.71	0	0	0.217	0	0.475
CPI-SS0ADA38C78	ACKR2_CCL7	simple:O00590	simple:P80098	ENSG00000144648	ENSG00000108688	TRUE	TRUE	FALSE	curated	FALSE	0.529	0	0.509	0.559	NA	NA
CPI-SS008EB600F	CCR2_CCL7	simple:P41597	simple:P80098	ENSG00000121807	ENSG00000108688	TRUE	TRUE	FALSE	curated	FALSE	0	0	3155	0.788	NA	NA
CPI-SS08B91FD2A	CCR1_CCL7	simple:P32246	simple:P80098	ENSG00000163823	ENSG00000108688	TRUE	TRUE	FALSE	curated	FALSE	0	0	0.353	0	NA	NA
CPI-SS0CBA3DA0D	CCR3_CCL7	simple:P51677	simple:P80098	ENSG00000183625	ENSG00000108688	TRUE	TRUE	FALSE	curated	FALSE	0.547	0	0.369	0	NA	NA
CPI-SS0B186A32C	CCR5_CCL7	simple:P51681	simple:P80098	ENSG00000160791	ENSG00000108688	TRUE	TRUE	FALSE	curated	FALSE	0	0	0	0	NA	NA
CPI-SS0D34B5517	ACKR2_CCL27	simple:O00590	simple:Q9Y4X3	ENSG00000144648	ENSG00000213927	TRUE	TRUE	FALSE	I2D	FALSE	0.559	0	0	0	NA	NA
CPI-SS09199F78C	CCR1_CCL23	simple:P32246	simple:P55773	ENSG00000163823	ENSG00000276114	TRUE	TRUE	FALSE	curated	FALSE	0	0	0.089	0	NA	NA
CPI-SS0D57FCA8C	IDE_CCL23	simple:P14735	simple:P55773	ENSG00000119912	ENSG00000276114	TRUE	TRUE	FALSE	InnateDB-All	FALSE	2578	0	0	1345	NA	NA
CPI-SS041751A4D	CCR1_CCL18	simple:P32246	simple:P55774	ENSG00000163823	ENSG00000278006	TRUE	TRUE	FALSE	guidetopharmacology.org	FALSE	0	0	0.033	1536	NA	NA
CPI-SS03188FD02	CCR8_CCL18	simple:P51685	simple:P55774	ENSG00000179934	ENSG00000278006	TRUE	TRUE	FALSE	curated	FALSE	0	0	0.036	0	NA	NA
CPI-SS08920B6FF	PODXL_SELL	simple:O00592	simple:P14151	ENSG00000128567	ENSG00000188404	FALSE	FALSE	FALSE	curated	FALSE	1723	0	1521	0	0	0.059
CPI-SS0A28DCA72	CXCL12_CXCR4	simple:P48061	simple:P61073	ENSG00000107562	ENSG00000121966	TRUE	FALSE	TRUE	curated	FALSE	0	0.42	0	0	0.796	0
CPI-SS04B547174	OXT_OXTR	simple:P01178	simple:P30559	ENSG00000101405	ENSG00000180914	TRUE	FALSE	TRUE	I2D	FALSE	0.69	0	0.341	0.274	0	0
CPI-SS053613259	NRG2_ERBB3	simple:O14511	simple:P21860	ENSG00000158458	ENSG00000065361	TRUE	FALSE	TRUE	curated	FALSE	0	0.288	0	0.108	NA	NA
CPI-SS0E063192D	NRG2_ERBB4	simple:O14511	simple:Q15303	ENSG00000158458	ENSG00000178568	TRUE	FALSE	TRUE	curated	FALSE	0	3346	0.106	0	NA	NA
CPI-SS0F0D7F25C	BTC_ERBB4	simple:P35070	simple:Q15303	ENSG00000174808	ENSG00000178568	TRUE	FALSE	TRUE	curated	FALSE	0	3851	0.092	0	0	0
CPI-SS0D5E30C6C	NRG3_ERBB4	simple:P56975	simple:Q15303	ENSG00000185737	ENSG00000178568	TRUE	FALSE	TRUE	curated	FALSE	0	3309	0	0	0	0.187
CPI-SS0BD5C2A23	NRG1_ERBB4	simple:Q02297	simple:Q15303	ENSG00000157168	ENSG00000178568	TRUE	TRUE	TRUE	curated	FALSE	3098	3474	0	0.042	0	0.26
CPI-SC0E5218AA4	NRG1_a6b4 complex	simple:Q02297	complex:a6b4 complex	ENSG00000157168		TRUE	TRUE	FALSE	curated	TRUE	2875	0	0	0	0.569	0.62
CPI-SC0A68C5F13	IGF1_a6b4 complex	simple:P05019	complex:a6b4 complex	ENSG00000017427		TRUE	FALSE	FALSE	curated	TRUE	0	0	0.208	0.276	0.736	1399
CPI-SS0708FE6FF	NRG1_LSR	simple:Q02297	simple:Q86X29	ENSG00000157168	ENSG00000105699	TRUE	TRUE	TRUE	InnateDB-All	FALSE	3258	0.828	0	0.063	0.608	0
CPI-SS0E075E5AF	NRG1_NETO2	simple:Q02297	simple:Q8NC67	ENSG00000157168	ENSG00000171208	TRUE	TRUE	TRUE	InnateDB-All	FALSE	3522	2105	0.22	0	0	2863
CPI-SS02572E1EF	NRG1_LGR4	simple:Q02297	simple:Q9BXB1	ENSG00000157168	ENSG00000205213	TRUE	TRUE	TRUE	InnateDB-All	FALSE	4567	1183	0	0	3253	0
CPI-SS01E3453DB	RSPO2_LGR4	simple:Q6UXX9	simple:Q9BXB1	ENSG00000147655	ENSG00000205213	TRUE	FALSE	TRUE	guidetopharmacology.org	FALSE	4588	0	0.294	0.276	0	2.53
CPI-SS019104E2E	RSPO2_LGR6	simple:Q6UXX9	simple:Q9HBX8	ENSG00000147655	ENSG00000133067	TRUE	FALSE	TRUE	guidetopharmacology.org	FALSE	2961	0	0	0.063	0.934	0
CPI-SS0EB5364D4	RSPO3_LGR6	simple:Q9BXY4	simple:Q9HBX8	ENSG00000146374	ENSG00000133067	TRUE	FALSE	TRUE	guidetopharmacology.org	FALSE	0	0.184	0	0.336	2164	2.76
CPI-SS027AFFC0E	NCR3_BAG6	simple:O14931	simple:P46379	ENSG00000236315	ENSG00000229524	FALSE	TRUE	FALSE	curated	FALSE	0.904	1498	0.109	0	NA	NA
CPI-SS0F94547B2	NCR3_NCR3LG1	simple:O14931	simple:Q68D85	ENSG00000236315	ENSG00000188211	FALSE	TRUE	FALSE	curated	FALSE	0.187	0	0	0	NA	NA
CPI-SS06A999D25	PLD2_ARF1	simple:O14939	simple:P84077	ENSG00000129219	ENSG00000143761	FALSE	FALSE	FALSE	guidetopharmacology.org	FALSE	0	1.36	0.539	0.312	0	1427
CPI-SS0F3A089DE	SEMA3E_PLXND1	simple:O15041	simple:Q9Y4D7	ENSG00000170381	ENSG00000004399	TRUE	FALSE	TRUE	curated	FALSE	1196	0	0	0.312	0	0.646
CPI-SS044C72D0D	SEMA4A_PLXND1	simple:Q9H3S1	simple:Q9Y4D7	ENSG00000196189	ENSG00000004399	FALSE	FALSE	TRUE	curated	FALSE	0.462	0	0.714	0.196	0	0
CPI-SS0BAB460FF	ANGPT2_TEK	simple:O15123	simple:Q02763	ENSG00000091879	ENSG00000120156	TRUE	FALSE	TRUE	curated	FALSE	0.319	2208	0	0	0	0.5
CPI-SS090FC28E1	EPHB6_EFNB2	simple:O15197	simple:P52799	ENSG00000275482	ENSG00000125266	TRUE	TRUE	TRUE	curated	FALSE	0	1.79	0	0	0.952	1639
CPI-SS04124F4E1	EPO_EFNB2	simple:P01588	simple:P52799	ENSG00000130427	ENSG00000125266	TRUE	FALSE	TRUE	IMEx,IntAct	FALSE	0	1.79	0	0	0	0.324
CPI-SS0B9E8C0DE	EPHB2_EFNB2	simple:P29323	simple:P52799	ENSG00000133216	ENSG00000125266	FALSE	TRUE	TRUE	curated	FALSE	0	1.79	0	0	0.212	0
CPI-SS0DC4D593E	EPHB6_EFNB1	simple:O15197	simple:P98172	ENSG00000275482	ENSG00000090776	TRUE	TRUE	FALSE	curated	FALSE	0	0.293	0	0.353	0.426	0.585
CPI-SS0111AAD26	EPHB2_EFNB1	simple:P29323	simple:P98172	ENSG00000133216	ENSG00000090776	FALSE	TRUE	FALSE	curated	FALSE	1135	0.293	0	0	2254	1.65
CPI-SS0F21D6CA0	EPHB4_EFNB1	simple:P54760	simple:P98172	ENSG00000196411	ENSG00000090776	FALSE	TRUE	FALSE	curated	FALSE	0	0.47	0	0.079	0.212	0
CPI-SS0470AF83E	EPHB1_EFNB1	simple:P54762	simple:P98172	ENSG00000154928	ENSG00000090776	FALSE	TRUE	FALSE	curated	FALSE	2.59	1018	0	0.157	0.339	3156
CPI-SS00046DCF3	EPHA4_EFNB1	simple:P54764	simple:P98172	ENSG00000116106	ENSG00000090776	FALSE	TRUE	FALSE	curated	FALSE	2556	0.429	0.078	0.066	0.339	2748
CPI-SS08718E4FB	EPHB6_EFNB3	simple:O15197	simple:Q15768	ENSG00000275482	ENSG00000108947	TRUE	TRUE	TRUE	curated	FALSE	0	0.557	0.328	1572	0.438	1363
CPI-SS0DA366C78	EPHB2_EFNB3	simple:P29323	simple:Q15768	ENSG00000133216	ENSG00000108947	FALSE	TRUE	TRUE	curated	FALSE	0	0.557	0.804	2042	2212	0
CPI-SS0865716E5	EPHB4_EFNB3	simple:P54760	simple:Q15768	ENSG00000196411	ENSG00000108947	FALSE	TRUE	TRUE	curated	FALSE	0	0.735	0	0.066	0.36	1432
CPI-SS0D41C7AF5	EPHB1_EFNB3	simple:P54762	simple:Q15768	ENSG00000154928	ENSG00000108947	FALSE	TRUE	TRUE	curated	FALSE	0	1283	0.784	0	2135	0
CPI-SS07CA5A6F1	EPHA4_EFNB3	simple:P54764	simple:Q15768	ENSG00000116106	ENSG00000108947	FALSE	TRUE	TRUE	curated	FALSE	0	0.693	0.089	0	0.292	0
CPI-SS087A17AD6	EPO_EPOR	simple:P01588	simple:P19235	ENSG00000130427	ENSG00000187266	TRUE	FALSE	TRUE	curated	FALSE	0	0.164	0	0	1484	0.662
CPI-SS0A0DE9CD6	EPO_EPHB4	simple:P01588	simple:P54760	ENSG00000130427	ENSG00000196411	TRUE	FALSE	TRUE	IMEx,InnateDB-All,IntAct	FALSE	0	0	0.073	0	0	0.31
CPI-SS08D0F9109	EFNB2_EPHB4	simple:P52799	simple:P54760	ENSG00000125266	ENSG00000196411	FALSE	TRUE	TRUE	curated	FALSE	1968	0	0.079	0	0.327	0.499
CPI-SS0586F2596	EPHB2_EFNA5	simple:P29323	simple:P52803	ENSG00000133216	ENSG00000184349	FALSE	TRUE	FALSE	curated	FALSE	0	0.683	0	0	0	0.384
CPI-SS03A2EFDD5	EPHA1_EFNA5	simple:P21709	simple:P52803	ENSG00000284816	ENSG00000184349	FALSE	TRUE	FALSE	curated	FALSE	0	0.685	0.106	0	0.773	0
CPI-SS0BEAB521F	EPHA3_EFNA5	simple:P29320	simple:P52803	ENSG00000044524	ENSG00000184349	TRUE	TRUE	FALSE	curated	FALSE	0	0.685	0.183	0.772	0.36	0.326
CPI-SS012CCE326	EPHA8_EFNA5	simple:P29322	simple:P52803	ENSG00000070886	ENSG00000184349	FALSE	TRUE	FALSE	curated	FALSE	0	0.694	0.203	0.265	0.103	0
CPI-SS0BFD8E056	EFNB2_EPHB1	simple:P52799	simple:P54762	ENSG00000125266	ENSG00000154928	FALSE	TRUE	TRUE	curated	FALSE	2516	0	0.183	0.285	1295	0
CPI-SS01A8F745A	EPHA1_EFNA3	simple:P21709	simple:P52797	ENSG00000284816	ENSG00000143590	FALSE	TRUE	FALSE	curated	FALSE	0	0.328	0.098	2095	0	0
CPI-SS0AB0604B5	EPHA3_EFNA3	simple:P29320	simple:P52797	ENSG00000044524	ENSG00000143590	TRUE	TRUE	FALSE	curated	FALSE	0	0.328	0.117	1588	0.188	0
CPI-SS0DF162C10	EPHA8_EFNA3	simple:P29322	simple:P52797	ENSG00000070886	ENSG00000143590	FALSE	TRUE	FALSE	curated	FALSE	0	0.338	0.098	1608	2.57	0.949
CPI-SS05E6D620E	EPHA1_EFNA4	simple:P21709	simple:P52798	ENSG00000284816	ENSG00000243364	TRUE	TRUE	FALSE	curated	FALSE	0.485	0	0.326	1423	1.47	0
CPI-SS041888D39	EPHA3_EFNA4	simple:P29320	simple:P52798	ENSG00000044524	ENSG00000243364	TRUE	TRUE	FALSE	curated	FALSE	0	0	0.345	0.916	1231	0
CPI-SS02B285B4D	EPHA8_EFNA4	simple:P29322	simple:P52798	ENSG00000070886	ENSG00000243364	TRUE	TRUE	FALSE	curated	FALSE	0.414	0	0.326	0.936	0	0
CPI-SS0AB647854	GPR37_PSAP	simple:O15354	simple:P07602	ENSG00000170775	ENSG00000197746	TRUE	TRUE	FALSE	guidetopharmacology.org	FALSE	4293	0	0.326	1166	2168	0
CPI-SS082900482	GPR37L1_PSAP	simple:O60883	simple:P07602	ENSG00000170075	ENSG00000197746	TRUE	TRUE	FALSE	guidetopharmacology.org	FALSE	0	1452	0.144	0	1845	0
CPI-SS070B0E458	GRIN2A_IL16	simple:Q12879	simple:Q14005	ENSG00000183454	ENSG00000172349	TRUE	TRUE	FALSE	I2D	FALSE	2096	1757	1747	0	0	0
CPI-SS0D529E576	GRIN2B_IL16	simple:Q13224	simple:Q14005	ENSG00000273079	ENSG00000172349	TRUE	TRUE	FALSE	I2D	FALSE	2059	2045	0.625	3083	2142	2.46
CPI-SS068C129D6	CSF1_SIRPA	simple:P09603	simple:P78324	ENSG00000184371	ENSG00000198053	TRUE	FALSE	TRUE	I2D	FALSE	0	1431	2214	3292	0	2109
CPI-SS086615F9B	CSF1_CELSR3	simple:P09603	simple:Q9NYQ7	ENSG00000184371	ENSG00000008300	TRUE	FALSE	TRUE	I2D	FALSE	0	0	0.106	0	0	2182
CPI-SS055B305F1	CEACAM1_CD209	simple:P13688	simple:Q9NNX6	ENSG00000079385	ENSG00000090659	TRUE	FALSE	TRUE	curated	FALSE	0	0.323	0.202	0.249	0	0.417
CPI-SS0A2D7895C	CEACAM1_CEACAM6	simple:P13688	simple:P40199	ENSG00000079385	ENSG00000086548	TRUE	FALSE	FALSE	curated	FALSE	0	0	0	0	NA	NA
CPI-SS08C411721	CEACAM8_CEACAM6	simple:P31997	simple:P40199	ENSG00000124469	ENSG00000086548	FALSE	FALSE	FALSE	curated	FALSE	0.169	0	0	0	NA	NA
CPI-SS001BF66E8	CEACAM6_CEACAM6	simple:P40199	simple:P40199	ENSG00000086548	ENSG00000086548	FALSE	FALSE	FALSE	curated	FALSE	0	0	0.08	0	NA	NA
CPI-SS0CCDBBBC0	CEACAM1_CEACAM8	simple:P13688	simple:P31997	ENSG00000079385	ENSG00000124469	TRUE	FALSE	FALSE	curated	FALSE	0	0.101	0	0.229	0.708	1115
CPI-SS042EB8C7A	TBXA2R_GHRL	simple:P21731	simple:Q9UBU3	ENSG00000006638	ENSG00000157017	TRUE	TRUE	FALSE	InnateDB-All	FALSE	0	0	0	0	NA	NA
CPI-SS043E0F61D	PTGER3_GHRL	simple:P43115	simple:Q9UBU3	ENSG00000050628	ENSG00000157017	TRUE	TRUE	FALSE	InnateDB-All	FALSE	0	0	0.122	0	NA	NA
CPI-SS090987D9C	GHRHR_GHRL	simple:Q02643	simple:Q9UBU3	ENSG00000106128	ENSG00000157017	TRUE	TRUE	FALSE	I2D	FALSE	0.459	0	0.127	0	NA	NA
CPI-SS07D40A3F3	GHSR_GHRL	simple:Q92847	simple:Q9UBU3	ENSG00000121853	ENSG00000157017	TRUE	TRUE	FALSE	guidetopharmacology.org	FALSE	0	0	0	0	NA	NA
CPI-SS085C150CE	ACE2_GHRL	simple:Q9BYF1	simple:Q9UBU3	ENSG00000130234	ENSG00000157017	TRUE	TRUE	FALSE	I2D	FALSE	3018	0	0.17	0	NA	NA
CPI-SS0EB3C2743	GHSR_LEAP2	simple:Q92847	simple:Q969E1	ENSG00000121853	ENSG00000164406	TRUE	TRUE	FALSE	guidetopharmacology.org	FALSE	0	0.583	0.171	0	NA	NA
CPI-SS08A819670	CD70_GPRC5B	simple:P32970	simple:Q9NZH0	ENSG00000125726	ENSG00000167191	TRUE	FALSE	TRUE	InnateDB-All	FALSE	0.205	0	0.106	0	0.829	0
CPI-SS0B9B3870A	VEGFA_FLT1	simple:P15692	simple:P17948	ENSG00000112715	ENSG00000102755	TRUE	FALSE	TRUE	curated	FALSE	0.433	2689	0.081	0	0.929	1115
CPI-SS02371A6D6	VEGFA_EPHB2	simple:P15692	simple:P29323	ENSG00000112715	ENSG00000133216	TRUE	FALSE	TRUE	I2D	FALSE	0.391	2118	0.068	0	0.818	0
CPI-SS0C694CB44	VEGFA_GRIN2B	simple:P15692	simple:Q13224	ENSG00000112715	ENSG00000273079	TRUE	FALSE	TRUE	I2D	FALSE	0.729	3658	0	0	0	3277
CPI-SS082AD7B6A	FZD6_WNT5A	simple:O60353	simple:P41221	ENSG00000164930	ENSG00000114251	TRUE	TRUE	FALSE	curated	FALSE	1565	1106	0.154	0	0	2344
CPI-SC0FDB4B6D9	GDF9_TGFR_BMPR2	simple:O60383	complex:TGFR_BMPR2	ENSG00000164404		TRUE	FALSE	TRUE	curated	FALSE	5448	1.68	0	0	0	2272
CPI-SS070C51D94	FZD7_WNT3	simple:O75084	simple:P56703	ENSG00000155760	ENSG00000277641	TRUE	TRUE	FALSE	curated	FALSE	0	0	0	0	0.649	0
CPI-SS0A4EE6FE1	LRP5_FAM3B	simple:O75197	simple:P58499	ENSG00000162337	ENSG00000183844	TRUE	TRUE	FALSE	InnateDB-All	FALSE	0	1195	0	0.635	0.76	0
CPI-SS0A874F65F	LGR4_RSPO3	simple:Q9BXB1	simple:Q9BXY4	ENSG00000205213	ENSG00000146374	TRUE	TRUE	FALSE	guidetopharmacology.org	FALSE	1019	0	0.637	0	0.065	0
CPI-SS05162C56B	NTF3_NTRK3	simple:P20783	simple:Q16288	ENSG00000185652	ENSG00000140538	TRUE	FALSE	TRUE	curated	FALSE	0.785	0	0.637	0	NA	NA
CPI-SS0829B8FD2	GRN_CLEC4M	simple:P28799	simple:Q9H2X3	ENSG00000030582	ENSG00000104938	TRUE	FALSE	TRUE	InnateDB-All	FALSE	1239	0	0.7	0	0.695	0
CPI-SS0BE567EFB	GAL_GALR1	simple:P22466	simple:P47211	ENSG00000069482	ENSG00000166573	TRUE	FALSE	TRUE	guidetopharmacology.org	FALSE	0	0.383	0.387	0.459	0.944	1677
CPI-SS03E48EFEA	C3_C3AR1	simple:P01024	simple:Q16581	ENSG00000125730	ENSG00000171860	TRUE	FALSE	TRUE	guidetopharmacology.org	FALSE	0.735	0	0.387	0.459	NA	NA
CPI-SS03E273233	ADORA2A_ENTPD1	simple:P29274	simple:P49961	ENSG00000128271	ENSG00000138185	FALSE	TRUE	FALSE	curated	FALSE	0	0.801	0.387	0.146	1241	1597
CPI-SS0FF6CFDCA	ADORA3_ENTPD1	simple:P0DMS8	simple:P49961	ENSG00000282608	ENSG00000138185	FALSE	TRUE	FALSE	curated	FALSE	0.698	0	0.102	0	0	1855
CPI-SS03E7587E4	ADORA1_ENTPD1	simple:P30542	simple:P49961	ENSG00000163485	ENSG00000138185	FALSE	TRUE	FALSE	curated	FALSE	0	0.67	0.133	0	2178	1988
CPI-SS05996C8FD	AGT_AGTR1	simple:P01019	simple:P30556	ENSG00000135744	ENSG00000144891	TRUE	FALSE	TRUE	guidetopharmacology.org	FALSE	0	0.26	0.2	0	1543	1651
CPI-SS00581282E	C5_C5AR1	simple:P01031	simple:P21730	ENSG00000106804	ENSG00000197405	TRUE	FALSE	TRUE	guidetopharmacology.org	FALSE	3144	0.503	0.151	0	0.249	1605
CPI-SS0A7E3A1AF	C5_C5AR2	simple:P01031	simple:Q9P296	ENSG00000106804	ENSG00000134830	TRUE	FALSE	TRUE	guidetopharmacology.org	FALSE	3016	0	0.101	0	0	2335
CPI-SS033180726	CGA_LHCGR	simple:P01215	simple:P22888	ENSG00000135346	ENSG00000138039	TRUE	FALSE	TRUE	I2D,InnateDB-All	FALSE	0.658	0	0.101	0	NA	NA
CPI-SS0DEF5D0CE	LHB_LHCGR	simple:P01229	simple:P22888	ENSG00000104826	ENSG00000138039	TRUE	FALSE	TRUE	I2D	FALSE	0	0	NA	NA	NA	NA
CPI-SS0577408A3	CGA_FSHR	simple:P01215	simple:P23945	ENSG00000135346	ENSG00000170820	TRUE	FALSE	TRUE	I2D,InnateDB-All	FALSE	1402	0	0.249	0	1955	0.657
CPI-SS00689751B	PRL_PRLR	simple:P01236	simple:P16471	ENSG00000172179	ENSG00000113494	TRUE	FALSE	TRUE	I2D,IMEx,InnateDB,IntAct	FALSE	2045	0	1222	0.118	0	0.644
CPI-SS01963C4CA	TG_ASGR1	simple:P01266	simple:P07306	ENSG00000042832	ENSG00000141505	TRUE	FALSE	TRUE	I2D	FALSE	0	0.728	0	0.049	0	0.814
CPI-SC09E5431A2	IFNG_Type II IFNR	simple:P01579	complex:Type II IFNR	ENSG00000111537		TRUE	FALSE	TRUE	curated	FALSE	0	1224	NA	NA	0	0.742
CPI-SS0F739D3DB	ANXA1_FPR1	simple:P04083	simple:P21462	ENSG00000135046	ENSG00000171051	TRUE	FALSE	TRUE	guidetopharmacology.org	FALSE	0	0	0	0	0.877	2203
CPI-SS045EC4F7D	RLN2_RXFP1	simple:P04090	simple:Q9HBX9	ENSG00000107014	ENSG00000171509	TRUE	FALSE	TRUE	guidetopharmacology.org	FALSE	1385	0	0	0	0	2733
CPI-SS0FAE75A75	RLN1_RXFP1	simple:P04808	simple:Q9HBX9	ENSG00000107018	ENSG00000171509	TRUE	FALSE	TRUE	guidetopharmacology.org	FALSE	1471	0	0.14	0	0	0.739
CPI-SS08805BBC2	INSL3_RXFP1	simple:P51460	simple:Q9HBX9	ENSG00000248099	ENSG00000171509	TRUE	FALSE	TRUE	guidetopharmacology.org	FALSE	0.285	0.526	0.65	0	0.609	0
CPI-SS01AD399A0	IL4_IL13RA2	simple:P05112	simple:Q14627	ENSG00000113520	ENSG00000123496	TRUE	FALSE	TRUE	I2D	FALSE	1857	0	0	0	0	0
CPI-SS0BCCDFA7A	NAMPT_IL13RA2	simple:P43490	simple:Q14627	ENSG00000105835	ENSG00000123496	TRUE	FALSE	TRUE	InnateDB-All	FALSE	1858	0	0	0	0	1983
CPI-SS0C85BC9AF	PROS1_AXL	simple:P07225	simple:P30530	ENSG00000184500	ENSG00000167601	TRUE	FALSE	TRUE	guidetopharmacology.org	FALSE	0	0.517	0.517	1038	0.289	1925
CPI-SS09C4988F8	PROS1_TYRO3	simple:P07225	simple:Q06418	ENSG00000184500	ENSG00000092445	TRUE	FALSE	TRUE	guidetopharmacology.org	FALSE	0	0.224	0	1098	0	2041
CPI-SS0B01CF3AB	CSF1R_CSF1	simple:P07333	simple:P09603	ENSG00000182578	ENSG00000184371	TRUE	TRUE	FALSE	curated	FALSE	1935	0	0	1064	0.393	0
CPI-SS061A7E099	CD55_ADGRE5	simple:P08174	simple:P48960	ENSG00000196352	ENSG00000123146	TRUE	TRUE	TRUE	curated	FALSE	3064	1878	0.075	0	3626	0.557
CPI-SS0CBC7840D	PTPRC_CD22	simple:P08575	simple:P20273	ENSG00000262418	ENSG00000012124	FALSE	FALSE	TRUE	curated	FALSE	0	0.072	0	1042	0	0.541
CPI-SS0822AEF5F	PTPRC_MRC1	simple:P08575	simple:P22897	ENSG00000262418	ENSG00000260314	FALSE	FALSE	TRUE	curated	FALSE	0	2234	0	0	2354	0
CPI-SS07F60834D	MET_HGF	simple:P08581	simple:P14210	ENSG00000105976	ENSG00000019991	TRUE	TRUE	FALSE	curated	FALSE	0	0.568	0	0	0	0
CPI-SS056FF4363	CD48_CD244	simple:P09326	simple:Q9BZW8	ENSG00000117091	ENSG00000122223	FALSE	FALSE	TRUE	curated	FALSE	0	0	0	0	NA	NA
CPI-SS080611C5B	ALOX5_ALOX5AP	simple:P09917	simple:P20292	ENSG00000275565	ENSG00000132965	FALSE	FALSE	FALSE	guidetopharmacology.org	FALSE	1248	0.641	0.165	0	2499	0
CPI-SS0270A2CA9	NPS_NPSR1	simple:P0C0P6	simple:Q6W5P4	ENSG00000214285	ENSG00000187258	TRUE	FALSE	TRUE	guidetopharmacology.org	FALSE	0	0.844	0	0	NA	NA
CPI-SS08719F19E	APELA_APLNR	simple:P0DMC3	simple:P35414	ENSG00000248329	ENSG00000134817	TRUE	FALSE	TRUE	guidetopharmacology.org	FALSE	0	0	0	0	NA	NA
CPI-SS02D7A1DDE	KIT_KITLG	simple:P10721	simple:P21583	ENSG00000157404	ENSG00000049130	TRUE	TRUE	FALSE	curated	FALSE	2584	0	0	0	0	0
CPI-SS0EDAE16B6	EPOR_KITLG	simple:P19235	simple:P21583	ENSG00000187266	ENSG00000049130	TRUE	TRUE	FALSE	I2D	FALSE	0.156	0	0	0	0	0
CPI-SS0EB5AEC83	SELL_CD34	simple:P14151	simple:P28906	ENSG00000188404	ENSG00000174059	FALSE	FALSE	FALSE	curated	FALSE	0	0	0	0	1026	0
CPI-SS015E1E2C6	SELP_CD34	simple:P16109	simple:P28906	ENSG00000174175	ENSG00000174059	FALSE	FALSE	FALSE	curated	FALSE	0.083	0	0	0	0	2239
CPI-SS087321EB5	SELL_SELPLG	simple:P14151	simple:Q14242	ENSG00000188404	ENSG00000110876	FALSE	FALSE	TRUE	curated	FALSE	0	0.244	0	0	0.458	1569
CPI-SS02B7540B0	SELP_SELPLG	simple:P16109	simple:Q14242	ENSG00000174175	ENSG00000110876	FALSE	FALSE	TRUE	curated	FALSE	0.214	0	0	0	0.596	1.74
CPI-SS02A170A99	SPN_SIGLEC1	simple:P16150	simple:Q9BZZ2	ENSG00000197471	ENSG00000088827	TRUE	FALSE	FALSE	curated	FALSE	0	0	0	0.124	0.497	0
CPI-SS03CC15FF3	PDGFRA_PDGFC	simple:P16234	simple:Q9NRA1	ENSG00000134853	ENSG00000145431	TRUE	TRUE	FALSE	curated	FALSE	0	0.815	0	0.219	0.481	0.61
CPI-SS03A3EE72E	FLT4_PDGFC	simple:P35916	simple:Q9NRA1	ENSG00000037280	ENSG00000145431	TRUE	TRUE	FALSE	guidetopharmacology.org	FALSE	0	0.743	0.294	0	0.549	2053
CPI-SS0F972435E	FLT4_VEGFC	simple:P35916	simple:P49767	ENSG00000037280	ENSG00000150630	TRUE	TRUE	FALSE	curated	FALSE	0	0.997	0	0.23	0.083	0
CPI-SS0273C9AED	KDR_VEGFC	simple:P35968	simple:P49767	ENSG00000128052	ENSG00000150630	TRUE	TRUE	FALSE	curated	FALSE	0	1077	0	0.153	0.244	0.223
CPI-SS0E0DEA7D5	PECAM1_CD38	simple:P16284	simple:P28907	ENSG00000261371	ENSG00000004468	FALSE	TRUE	TRUE	curated	FALSE	0	2726	0	0.066	0	0.396
CPI-SS081AD39D7	PECAM1_CD177	simple:P16284	simple:Q8N6Q3	ENSG00000261371	ENSG00000204936	FALSE	TRUE	FALSE	curated	FALSE	1983	0.444	0	0.042	NA	NA
CPI-SS01946BE5C	C5AR1_RPS19	simple:P21730	simple:P39019	ENSG00000197405	ENSG00000105372	FALSE	TRUE	FALSE	guidetopharmacology.org	FALSE	4092	2421	0	0.094	1214	0.102
CPI-SS05E63FBEC	CXCR1_CXCL5	simple:P25024	simple:P42830	ENSG00000163464	ENSG00000163735	TRUE	TRUE	FALSE	curated	FALSE	0.648	0	0	0.048	NA	NA
CPI-SS0C7012011	CXCR1_YARS	simple:P25024	simple:P54577	ENSG00000163464	ENSG00000134684	FALSE	TRUE	FALSE	guidetopharmacology.org	FALSE	1301	0.448	0	0.043	0	0.36
CPI-SS0231B999D	GUCY2C_GUCA2B	simple:P25092	simple:Q16661	ENSG00000070019	ENSG00000044012	TRUE	TRUE	FALSE	guidetopharmacology.org	FALSE	0.349	0	NA	NA	2151	0.493
CPI-SS03EACE0E0	MST1_MST1R	simple:P26927	simple:Q04912	ENSG00000173531	ENSG00000164078	TRUE	FALSE	TRUE	curated	FALSE	0.414	0	0.294	0.089	0	2854
CPI-SS08991B378	CD6_ALCAM	simple:P30203	simple:Q13740	ENSG00000013725	ENSG00000170017	TRUE	FALSE	FALSE	curated	FALSE	0	0	0	0.09	0	2.8
CPI-SS0D0252D87	AXL_IL15RA	simple:P30530	simple:Q13261	ENSG00000167601	ENSG00000134470	TRUE	TRUE	TRUE	I2D	FALSE	0	2267	0	0.204	0	1939
CPI-SS077B160B9	IL15_IL15RA	simple:P40933	simple:Q13261	ENSG00000164136	ENSG00000134470	TRUE	FALSE	TRUE	guidetopharmacology.org	FALSE	0	0.842	0	0	0	1885
CPI-SS03A4F7DC8	AXL_GAS6	simple:P30530	simple:Q14393	ENSG00000167601	ENSG00000183087	TRUE	TRUE	FALSE	guidetopharmacology.org	FALSE	0.631	0	0	0	0.825	0
CPI-SS085195142	TYRO3_GAS6	simple:Q06418	simple:Q14393	ENSG00000092445	ENSG00000183087	TRUE	TRUE	FALSE	guidetopharmacology.org	FALSE	0.338	0	0.052	0	0	0
CPI-SS0415CC75D	MERTK_GAS6	simple:Q12866	simple:Q14393	ENSG00000153208	ENSG00000183087	TRUE	TRUE	FALSE	guidetopharmacology.org	FALSE	1361	0	0	0.67	0	0
CPI-SS0B27088B4	CALCR_ADM	simple:P30988	simple:P35318	ENSG00000004948	ENSG00000148926	TRUE	TRUE	FALSE	guidetopharmacology.org	FALSE	0.203	0	0	0.65	0	0.096
CPI-SS032CFAE42	CALCR_ADM2	simple:P30988	simple:Q7Z4H4	ENSG00000004948	ENSG00000128165	TRUE	TRUE	FALSE	guidetopharmacology.org	FALSE	0	0.063	0	0.764	1923	3999
CPI-SS0E5593D5C	BMP8B_PLAUR	simple:P34820	simple:Q03405	ENSG00000116985	ENSG00000011422	TRUE	FALSE	TRUE	InnateDB-All	FALSE	0	0.302	0.121	0.614	0.156	0
CPI-SS0A91954A0	RYK_WNT3A	simple:P34925	simple:P56704	ENSG00000163785	ENSG00000154342	TRUE	TRUE	FALSE	I2D	FALSE	1404	0	0	0.596	1.05	0
CPI-SS0D8148841	APLNR_APLN	simple:P35414	simple:Q9ULZ1	ENSG00000134817	ENSG00000171388	TRUE	TRUE	FALSE	guidetopharmacology.org	FALSE	0	0	0	0	1042	0
CPI-SS066FE05CA	LEP_LEPR	simple:P41159	simple:P48357	ENSG00000174697	ENSG00000116678	TRUE	FALSE	TRUE	curated	FALSE	0	0.511	0	0	1105	0
CPI-SS04CD88411	GPR1_RARRES2	simple:P46091	simple:Q99969	ENSG00000283448	ENSG00000106538	TRUE	TRUE	FALSE	guidetopharmacology.org	FALSE	1974	4053	0	0	0	0
CPI-SS07D56EB05	CMKLR1_RARRES2	simple:Q99788	simple:Q99969	ENSG00000174600	ENSG00000106538	TRUE	TRUE	FALSE	guidetopharmacology.org	FALSE	1896	0	0.215	0	1017	0
CPI-SS07B3139A0	NMU_NMUR2	simple:P48645	simple:Q9GZQ4	ENSG00000109255	ENSG00000132911	TRUE	FALSE	TRUE	guidetopharmacology.org	FALSE	0	0	0	0	NA	NA
CPI-SS0C849D294	NMS_NMUR2	simple:Q5H8A3	simple:Q9GZQ4	ENSG00000204640	ENSG00000132911	TRUE	FALSE	TRUE	guidetopharmacology.org	FALSE	0	0	0	0.102	NA	NA
CPI-SS018BD4882	NMU_NMUR1	simple:P48645	simple:Q9HB89	ENSG00000109255	ENSG00000171596	TRUE	FALSE	TRUE	guidetopharmacology.org	FALSE	0	0.326	0	0.131	NA	NA
CPI-SS0148BDF1C	NMS_NMUR1	simple:Q5H8A3	simple:Q9HB89	ENSG00000204640	ENSG00000171596	TRUE	FALSE	TRUE	guidetopharmacology.org	FALSE	0	0.083	0	0.131	NA	NA
CPI-CS0C57A3081	PlexinA1_complex1_SEMA6D	complex:PlexinA1_complex1	simple:Q8NFY4		ENSG00000137872	FALSE	TRUE	FALSE	curated	FALSE	0	0.522	0	0.212	2629	0
CPI-SS0B6F0C894	DSG2_DSC3	simple:Q14126	simple:Q14574	ENSG00000046604	ENSG00000134762	FALSE	FALSE	FALSE	curated	FALSE	1425	0	0	0.095	NA	NA
CPI-SS06D13FCD3	DSC2_DSG2	simple:Q02487	simple:Q14126	ENSG00000134755	ENSG00000046604	FALSE	FALSE	FALSE	curated	FALSE	0	1542	0	0	0	0.262
CPI-SS08B94BEB2	DSC1_DSG2	simple:Q08554	simple:Q14126	ENSG00000134765	ENSG00000046604	FALSE	FALSE	FALSE	curated	FALSE	0	1462	0	0	0	0
CPI-SS0B337B316	TEK_ANGPT1	simple:Q02763	simple:Q15389	ENSG00000120156	ENSG00000154188	TRUE	TRUE	FALSE	curated	FALSE	0	0.454	0	0	0.341	0
CPI-SS00BBA318F	TEK_ANGPT4	simple:Q02763	simple:Q9Y264	ENSG00000120156	ENSG00000101280	TRUE	TRUE	FALSE	curated	FALSE	2066	0	0	0.042	0	0
CPI-SS09D5B5F9C	LRP1_ERFE	simple:Q07954	simple:Q4G0M1	ENSG00000123384	ENSG00000178752	TRUE	TRUE	FALSE	InnateDB-All	FALSE	0	1187	0	0.075	0	0
CPI-SS0E9015902	CD47_SIRPG	simple:Q08722	simple:Q9P1W8	ENSG00000196776	ENSG00000089012	FALSE	TRUE	FALSE	curated	FALSE	1384	0	0	0	0	0.351
CPI-SC0EB8DC52F	CD47_SIRB1 complex	simple:Q08722	complex:SIRB1 complex	ENSG00000196776		FALSE	TRUE	TRUE	curated	FALSE	1403	0	0	0	NA	NA
CPI-SS083E7D88C	CRHR2_UCN2	simple:Q13324	simple:Q96RP3	ENSG00000106113	ENSG00000145040	TRUE	TRUE	FALSE	guidetopharmacology.org	FALSE	0	0	0	0	NA	NA
CPI-SS0D00AAD2F	SEMA5A_PLXNB3	simple:Q13591	simple:Q9ULL4	ENSG00000112902	ENSG00000198753	FALSE	FALSE	TRUE	curated	FALSE	1512	0	0	0	NA	NA
CPI-SS0893BD6B6	IL16_GRIN2C	simple:Q14005	simple:Q14957	ENSG00000172349	ENSG00000161509	TRUE	FALSE	TRUE	I2D	FALSE	2076	0.199	0	0	0.211	3284
CPI-SS07DFEBFA8	GPR19_ENHO	simple:Q15760	simple:Q6UWT2	ENSG00000183150	ENSG00000168913	TRUE	TRUE	FALSE	guidetopharmacology.org	FALSE	0	0	0	0	0.249	3392
CPI-SS067BA9202	LAIR1_LILRB4	simple:Q6GTX8	simple:Q8NHJ6	ENSG00000276163	ENSG00000278555	FALSE	TRUE	TRUE	curated	FALSE	0	0	0.19	0	0.77	3359
CPI-SS033E857EB	VSTM1_ADGRG3	simple:Q6UX27	simple:Q86Y34	ENSG00000276363	ENSG00000182885	TRUE	TRUE	TRUE	IMEx,IntAct	FALSE	0	0	0	0	NA	NA
CPI-SC07B4ED8C9	IFNL1_Type III IFNR	simple:Q8IU54	complex:Type III IFNR	ENSG00000182393		TRUE	FALSE	TRUE	curated	FALSE	0	0	0.26	0	NA	NA
CPI-SS09EF54490	ADGRV1_GPHA2	simple:Q8WXG9	simple:Q96T91	ENSG00000164199	ENSG00000149735	TRUE	TRUE	FALSE	InnateDB-All	FALSE	1.17	1937	0	0	2447	3342
CPI-SS00797FD15	EDA_EDA2R	simple:Q92838	simple:Q9HAV5	ENSG00000158813	ENSG00000131080	TRUE	FALSE	TRUE	guidetopharmacology.org	FALSE	0.768	0.232	0	0	NA	NA
CPI-SS05A8552D7	EDA_EDAR	simple:Q92838	simple:Q9UNE0	ENSG00000158813	ENSG00000135960	TRUE	FALSE	TRUE	guidetopharmacology.org	FALSE	0.68	1542	0.385	0.171	1865	0.475
CPI-SC047CEF2DD	CRLF2_TSLPR	simple:Q9HC73	complex:TSLPR	ENSG00000205755		TRUE	TRUE	TRUE	curated	FALSE	0.649	0	0	0.109	0	0.347
CPI-SS04C672963	ESAM_ESAM	simple:Q96AP7	simple:Q96AP7	ENSG00000149564	ENSG00000149564	FALSE	FALSE	FALSE	curated	FALSE	0	0	0.143	0	NA	NA
CPI-SS08C78576B	GPHA2_EPHA6	simple:Q96T91	simple:Q9UF33	ENSG00000149735	ENSG00000080224	TRUE	FALSE	TRUE	InnateDB-All	FALSE	1806	0.216	0	0	NA	NA
CPI-SS0281839F1	IL37_IL1RAPL1	simple:Q9NZH6	simple:Q9NZN1	ENSG00000125571	ENSG00000169306	TRUE	FALSE	TRUE	InnateDB	FALSE	0	0	0	0.09	0	0.27
CPI-SS0A7B487D4	KLRG2_WNT11	simple:A4D1S0	simple:O96014	ENSG00000188883	ENSG00000085741	TRUE	TRUE	FALSE	InnateDB-All	FALSE	NA	NA	0	0.874	NA	NA
CPI-SS0FEC87269	KLRG2_TNFSF9	simple:A4D1S0	simple:P41273	ENSG00000188883	ENSG00000125657	TRUE	TRUE	FALSE	InnateDB-All	FALSE	NA	NA	0	0	NA	NA
CPI-SS00A8596B5	PVR_TNFSF9	simple:P15151	simple:P41273	ENSG00000073008	ENSG00000125657	TRUE	TRUE	FALSE	InnateDB-All	FALSE	NA	NA	0	0.136	2292	0.595
CPI-SS0E70DD97F	GALR3_GAL	simple:O60755	simple:P22466	ENSG00000128310	ENSG00000069482	TRUE	TRUE	FALSE	guidetopharmacology.org	FALSE	NA	NA	0.665	0.231	NA	NA
CPI-SS00550260E	CADM3_NECTIN3	simple:Q8N126	simple:Q9NQS3	ENSG00000162706	ENSG00000177707	FALSE	FALSE	FALSE	curated	FALSE	NA	NA	0.808	0.564	NA	NA
CPI-SS0FEAC3352	GALR3_GALP	simple:O60755	simple:Q9UBC7	ENSG00000128310	ENSG00000197487	TRUE	TRUE	FALSE	guidetopharmacology.org	FALSE	NA	NA	0	0.18	NA	NA
CPI-SS0B0E74BC0	GALR1_GALP	simple:P47211	simple:Q9UBC7	ENSG00000166573	ENSG00000197487	TRUE	TRUE	FALSE	guidetopharmacology.org	FALSE	NA	NA	0	1619	NA	NA
CPI-SS09C06644C	CADM3_CADM1	simple:Q8N126	simple:Q9BY67	ENSG00000162706	ENSG00000182985	FALSE	FALSE	FALSE	curated	FALSE	NA	NA	4202	1623	NA	NA
CPI-SS0C9696AAA	CRTAM_CADM1	simple:O95727	simple:Q9BY67	ENSG00000109943	ENSG00000182985	FALSE	FALSE	FALSE	curated	FALSE	NA	NA	0	2161	2876	1546
CPI-SS02D18D12B	CADM3_CADM4	simple:Q8N126	simple:Q8NFZ8	ENSG00000162706	ENSG00000105767	FALSE	FALSE	FALSE	curated	FALSE	NA	NA	0.359	2249	NA	NA
CPI-SS0B3829651	CADM3_EPB41L1	simple:Q8N126	simple:Q9H4G0	ENSG00000162706	ENSG00000088367	FALSE	FALSE	FALSE	curated	FALSE	NA	NA	2024	2254	NA	NA
CPI-SS00661A3A4	NECTIN1_CADM3	simple:Q15223	simple:Q8N126	ENSG00000110400	ENSG00000162706	TRUE	TRUE	FALSE	curated	FALSE	NA	NA	0	2069	NA	NA
CPI-SC0A199B69E	COL10A1_a10b1 complex	simple:Q03692	complex:a10b1 complex	ENSG00000123500		TRUE	FALSE	FALSE	curated	TRUE	NA	NA	0	0.581	NA	NA
CPI-SC08938BB1C	COL21A1_a10b1 complex	simple:Q96P44	complex:a10b1 complex	ENSG00000124749		TRUE	FALSE	FALSE	curated	TRUE	NA	NA	0	0.151	2448	0
CPI-SC0DF986F22	COL10A1_a11b1 complex	simple:Q03692	complex:a11b1 complex	ENSG00000123500		TRUE	FALSE	FALSE	curated	TRUE	NA	NA	0	1045	NA	NA
CPI-SC037C3901A	COL21A1_a11b1 complex	simple:Q96P44	complex:a11b1 complex	ENSG00000124749		TRUE	FALSE	FALSE	curated	TRUE	NA	NA	1291	1474	4241	0.955
CPI-SC01115AAD1	COL10A1_a1b1 complex	simple:Q03692	complex:a1b1 complex	ENSG00000123500		TRUE	FALSE	FALSE	curated	TRUE	NA	NA	0	1133	NA	NA
CPI-SC09C06C70F	COL21A1_a1b1 complex	simple:Q96P44	complex:a1b1 complex	ENSG00000124749		TRUE	FALSE	FALSE	curated	TRUE	NA	NA	0	0.146	0	0.891
CPI-SC03C093767	COL10A1_a2b1 complex	simple:Q03692	complex:a2b1 complex	ENSG00000123500		TRUE	FALSE	FALSE	curated	TRUE	NA	NA	0.358	0	NA	NA
CPI-SC040C26CBD	COL21A1_a2b1 complex	simple:Q96P44	complex:a2b1 complex	ENSG00000124749		TRUE	FALSE	FALSE	curated	TRUE	NA	NA	0.296	0.195	4306	0
CPI-SC08B6B74FB	FN1_a2Bb3 complex	simple:P02751	complex:a2Bb3 complex	ENSG00000115414		TRUE	FALSE	FALSE	curated	TRUE	NA	NA	0.307	0	NA	NA
CPI-SC0BAB29E69	F2_a2Bb3 complex	simple:P00734	complex:a2Bb3 complex	ENSG00000180210		TRUE	FALSE	FALSE	curated	TRUE	NA	NA	2682	0	NA	NA
CPI-SC04FDBA606	PLG_a2Bb3 complex	simple:P00747	complex:a2Bb3 complex	ENSG00000122194		TRUE	FALSE	FALSE	curated	TRUE	NA	NA	0.296	0	NA	NA
CPI-SC08067D831	VTN_a2Bb3 complex	simple:P04004	complex:a2Bb3 complex	ENSG00000109072		TRUE	FALSE	FALSE	curated	TRUE	NA	NA	0.951	1436	NA	NA
CPI-SC0200AC9E3	THBS1_a2Bb3 complex	simple:P07996	complex:a2Bb3 complex	ENSG00000137801		FALSE	FALSE	FALSE	curated	TRUE	NA	NA	0.913	1301	NA	NA
CPI-SC0974B60B7	CD40LG_a2Bb3 complex	simple:P29965	complex:a2Bb3 complex	ENSG00000102245		TRUE	FALSE	FALSE	curated	TRUE	NA	NA	1027	1395	NA	NA
CPI-SC090855C8E	FN1_aVb3 complex	simple:P02751	complex:aVb3 complex	ENSG00000115414		TRUE	FALSE	FALSE	curated	TRUE	NA	NA	0.474	0.594	NA	NA
CPI-SC0B9199C7F	LAMC1_aVb3 complex	simple:P11047	complex:aVb3 complex	ENSG00000135862		TRUE	FALSE	FALSE	curated	TRUE	NA	NA	2921	0.425	NA	NA
CPI-SC0EC380922	F2_aVb3 complex	simple:P00734	complex:aVb3 complex	ENSG00000180210		TRUE	FALSE	FALSE	curated	TRUE	NA	NA	0.593	0.708	NA	NA
CPI-SC0530C27A8	VTN_aVb3 complex	simple:P04004	complex:aVb3 complex	ENSG00000109072		TRUE	FALSE	FALSE	curated	TRUE	NA	NA	3.04	0.539	NA	NA
CPI-SC0755598EE	THBS1_aVb3 complex	simple:P07996	complex:aVb3 complex	ENSG00000137801		FALSE	FALSE	FALSE	curated	TRUE	NA	NA	0	0	NA	NA
CPI-SC044E3F9B6	FGF2_aVb3 complex	simple:P09038	complex:aVb3 complex	ENSG00000138685		TRUE	FALSE	FALSE	curated	TRUE	NA	NA	0	0	NA	NA
CPI-SC0988E0218	SPP1_aVb3 complex	simple:P10451	complex:aVb3 complex	ENSG00000118785		TRUE	FALSE	FALSE	curated	TRUE	NA	NA	0	0	NA	NA
CPI-SC0E2D0DC4B	FGF1_aVb3 complex	simple:P05230	complex:aVb3 complex	ENSG00000113578		TRUE	FALSE	FALSE	curated	TRUE	NA	NA	0	0.196	NA	NA
CPI-SC00756BB93	THY1_aVb3 complex	simple:P04216	complex:aVb3 complex	ENSG00000154096		FALSE	FALSE	FALSE	curated	TRUE	NA	NA	1862	0.245	NA	NA
CPI-SC0E1037D03	VWF_aVb3 complex	simple:P04275	complex:aVb3 complex	ENSG00000110799		TRUE	FALSE	FALSE	curated	TRUE	NA	NA	0	0.109	NA	NA
CPI-SC05A209BEC	FCER2_aVb3 complex	simple:P06734	complex:aVb3 complex	ENSG00000104921		TRUE	TRUE	FALSE	curated	TRUE	NA	NA	0	0.177	NA	NA
CPI-SC02E74AFA5	MMP2_aVb3 complex	simple:P08253	complex:aVb3 complex	ENSG00000087245		TRUE	FALSE	FALSE	curated	TRUE	NA	NA	0	0.242	NA	NA
CPI-SC0A58E6695	TNC_aVb3 complex	simple:P24821	complex:aVb3 complex	ENSG00000041982		TRUE	FALSE	FALSE	curated	TRUE	NA	NA	1467	0.383	NA	NA
CPI-SC06525B099	L1CAM_aVb3 complex	simple:P32004	complex:aVb3 complex	ENSG00000198910		FALSE	FALSE	FALSE	curated	TRUE	NA	NA	0	0.246	NA	NA
CPI-SC095A2C115	PLAUR_aVb3 complex	simple:Q03405	complex:aVb3 complex	ENSG00000011422		TRUE	TRUE	FALSE	curated	TRUE	NA	NA	0.265	0.224	NA	NA
CPI-SC0EFCE145F	OMD_aVb3 complex	simple:Q99983	complex:aVb3 complex	ENSG00000127083		TRUE	FALSE	FALSE	curated	TRUE	NA	NA	2409	1298	NA	NA
CPI-SC07BE7830D	SPP1_a4b1 complex	simple:P10451	complex:a4b1 complex	ENSG00000118785		TRUE	FALSE	FALSE	curated	TRUE	NA	NA	0.675	1405	0	0
CPI-SC01833C7FC	PLA2G2A_a4b1 complex	simple:P14555	complex:a4b1 complex	ENSG00000188257		TRUE	FALSE	FALSE	curated	TRUE	NA	NA	2125	0	NA	NA
CPI-SC0B4D7E0FF	FN1_a4b7 complex	simple:P02751	complex:a4b7 complex	ENSG00000115414		TRUE	FALSE	FALSE	curated	TRUE	NA	NA	0	0	2465	0
CPI-SC08E97F7CA	VCAM1_a4b7 complex	simple:P19320	complex:a4b7 complex	ENSG00000162692		FALSE	FALSE	FALSE	curated	TRUE	NA	NA	0.372	0	0.303	0
CPI-SC098B43B5A	MADCAM1_a4b7 complex	simple:Q13477	complex:a4b7 complex	ENSG00000099866		FALSE	FALSE	FALSE	curated	TRUE	NA	NA	1878	0	NA	NA
CPI-SC0C8B4C056	CD40LG_a5b1 complex	simple:P29965	complex:a5b1 complex	ENSG00000102245		TRUE	FALSE	FALSE	curated	TRUE	NA	NA	0.445	0	NA	NA
CPI-SC062C5C6C2	PLA2G2A_a5b1 complex	simple:P14555	complex:a5b1 complex	ENSG00000188257		TRUE	FALSE	FALSE	curated	TRUE	NA	NA	2354	0	NA	NA
CPI-SC067AD890A	VTN_aVb1 complex	simple:P04004	complex:aVb1 complex	ENSG00000109072		TRUE	FALSE	FALSE	curated	TRUE	NA	NA	2.11	0.212	0	0.362
CPI-SC007890A1C	CDH1_aEb7 complex	simple:P12830	complex:aEb7 complex	ENSG00000039068		FALSE	FALSE	FALSE	curated	TRUE	NA	NA	0.814	0.517	0	1621
CPI-SS02AB0C3E0	SPP1_CD44	simple:P10451	simple:P16070	ENSG00000118785	ENSG00000026508	TRUE	FALSE	TRUE	I2D,IMEx,InnateDB-All,IntAct	FALSE	NA	NA	1925	0.287	1119	0.236
CPI-SS0AC594A8E	FGF17_FGFR4	simple:O60258	simple:P22455	ENSG00000158815	ENSG00000160867	TRUE	FALSE	TRUE	I2D	FALSE	NA	NA	0	0.151	NA	NA
CPI-SS0D4CA5D92	FGF18_FGFR4	simple:O76093	simple:P22455	ENSG00000156427	ENSG00000160867	TRUE	FALSE	TRUE	I2D	FALSE	NA	NA	2353	2314	0	0.42
CPI-SS05ECF1933	FGF3_FGFR4	simple:P11487	simple:P22455	ENSG00000186895	ENSG00000160867	TRUE	FALSE	TRUE	I2D	FALSE	NA	NA	0	2178	1816	1499
CPI-SS066347638	FGF5_FGFR4	simple:P12034	simple:P22455	ENSG00000138675	ENSG00000160867	TRUE	FALSE	TRUE	I2D,IMEx,InnateDB-All,IntAct	FALSE	NA	NA	0	2311	0	1.44
CPI-SS0D95D41D6	FGF7_FGFR4	simple:P21781	simple:P22455	ENSG00000140285	ENSG00000160867	TRUE	FALSE	TRUE	I2D	FALSE	NA	NA	1844	0	0.156	1.46
CPI-SS0467AFD8A	FGF17_FGFR1	simple:O60258	simple:P11362	ENSG00000158815	ENSG00000077782	TRUE	FALSE	TRUE	I2D,InnateDB-All	FALSE	NA	NA	0	0	NA	NA
CPI-SS0F2C6A4D4	FGF18_FGFR1	simple:O76093	simple:P11362	ENSG00000156427	ENSG00000077782	TRUE	FALSE	TRUE	I2D	FALSE	NA	NA	0.435	0	0.294	1569
CPI-SS0330D939A	FGF17_FGFR2	simple:O60258	simple:P21802	ENSG00000158815	ENSG00000066468	TRUE	FALSE	TRUE	I2D,InnateDB-All	FALSE	NA	NA	0.441	0	NA	NA
CPI-SS0F6A7A4DF	FGF18_FGFR2	simple:O76093	simple:P21802	ENSG00000156427	ENSG00000066468	TRUE	FALSE	TRUE	I2D	FALSE	NA	NA	0	0	0	0.253
CPI-SS06D341996	FGF3_FGFR2	simple:P11487	simple:P21802	ENSG00000186895	ENSG00000066468	TRUE	FALSE	TRUE	I2D,InnateDB-All	FALSE	NA	NA	0	0.031	1209	0.382
CPI-SS02FEAF02E	FGF5_FGFR2	simple:P12034	simple:P21802	ENSG00000138675	ENSG00000066468	TRUE	FALSE	TRUE	I2D,IMEx,InnateDB-All,IntAct	FALSE	NA	NA	1243	0	1145	0.224
CPI-SS0E928B8C8	FGF7_FGFR2	simple:P21781	simple:P21802	ENSG00000140285	ENSG00000066468	TRUE	FALSE	TRUE	I2D,IMEx,InnateDB-All,IntAct	FALSE	NA	NA	1551	0	0	0.547
CPI-SS0BC9F7E9E	FGF17_FGFR3	simple:O60258	simple:P22607	ENSG00000158815	ENSG00000068078	TRUE	FALSE	TRUE	I2D	FALSE	NA	NA	1748	1134	NA	NA
CPI-SS0E134097C	FGF18_FGFR3	simple:O76093	simple:P22607	ENSG00000156427	ENSG00000068078	TRUE	FALSE	TRUE	I2D	FALSE	NA	NA	1337	0	NA	NA
CPI-SS0C2A73A10	FGF3_FGFR3	simple:P11487	simple:P22607	ENSG00000186895	ENSG00000068078	TRUE	FALSE	TRUE	I2D	FALSE	NA	NA	1403	3559	NA	NA
CPI-SS076D8A297	FGF5_FGFR3	simple:P12034	simple:P22607	ENSG00000138675	ENSG00000068078	TRUE	FALSE	TRUE	I2D	FALSE	NA	NA	0.409	3346	NA	NA
CPI-SS00E68BB92	FGF7_FGFR3	simple:P21781	simple:P22607	ENSG00000140285	ENSG00000068078	TRUE	FALSE	TRUE	I2D	FALSE	NA	NA	0.192	3141	NA	NA
CPI-SS04297753E	SPP1_CCR8	simple:P10451	simple:P51685	ENSG00000118785	ENSG00000179934	TRUE	FALSE	TRUE	IMEx,MINT	FALSE	NA	NA	0.585	3203	NA	NA
CPI-SS0ADC886E5	CCL4_CCR8	simple:P13236	simple:P51685	ENSG00000277943	ENSG00000179934	TRUE	FALSE	TRUE	I2D	FALSE	NA	NA	1311	0	NA	NA
CPI-SS03A875239	CCL16_CCR8	simple:O15467	simple:P51685	ENSG00000275095	ENSG00000179934	TRUE	FALSE	TRUE	I2D	FALSE	NA	NA	0.316	0	NA	NA
CPI-SS0C1BD22BC	SPP1_PTGER4	simple:P10451	simple:P35408	ENSG00000118785	ENSG00000171522	TRUE	FALSE	TRUE	IMEx,MINT	FALSE	NA	NA	0.099	0	2287	0.76
CPI-SC01AB9BED7	SPP1_a9b1 complex	simple:P10451	complex:a9b1 complex	ENSG00000118785		TRUE	FALSE	FALSE	curated	TRUE	NA	NA	0.492	0	2566	0.356
CPI-SS0D46E2B45	TGFB3_TGFBR3	simple:P10600	simple:Q03167	ENSG00000119699	ENSG00000069702	TRUE	FALSE	TRUE	curated	FALSE	NA	NA	1282	0	0	0.284
CPI-SC07312BD5C	FCER2_aMb2 complex	simple:P06734	complex:aMb2 complex	ENSG00000104921		TRUE	TRUE	FALSE	curated	TRUE	NA	NA	0.288	0	0.218	0.413
CPI-SC03446A95E	FCER2_aXb2 complex	simple:P06734	complex:aXb2 complex	ENSG00000104921		TRUE	TRUE	FALSE	curated	TRUE	NA	NA	0.463	0	0.154	0.255
CPI-SS000568A0E	FCER2_CR2	simple:P06734	simple:P20023	ENSG00000104921	ENSG00000117322	TRUE	TRUE	TRUE	curated	FALSE	NA	NA	1.35	0	0	0.578
CPI-SS027556893	IFNA1_CR2	simple:P01562	simple:P20023	ENSG00000197919	ENSG00000117322	TRUE	FALSE	TRUE	I2D,InnateDB,InnateDB-All	FALSE	NA	NA	0.426	1724	NA	NA
CPI-SC0E8575642	ICAM3_aDb2 complex	simple:P32942	complex:aDb2 complex	ENSG00000076662		FALSE	FALSE	FALSE	curated	TRUE	NA	NA	0	1371	NA	NA
CPI-CS0A97B38B6	ACVL1_BMPR2_BMP10	complex:ACVL1_BMPR2	simple:O95393		ENSG00000163217	TRUE	TRUE	FALSE	curated	FALSE	NA	NA	0.208	1353	NA	NA
CPI-SS0D41E15AC	FFAR2_BMP10	simple:O15552	simple:O95393	ENSG00000126262	ENSG00000163217	TRUE	TRUE	FALSE	IMEx,IntAct	FALSE	NA	NA	1714	1581	NA	NA
CPI-SS01158CABF	FFAR2_FAM3C	simple:O15552	simple:Q92520	ENSG00000126262	ENSG00000196937	TRUE	TRUE	FALSE	IMEx,IntAct	FALSE	NA	NA	0.281	1526	NA	NA
CPI-SS072E1E27A	FFAR2_TNF	simple:O15552	simple:P01375	ENSG00000126262	ENSG00000228978	TRUE	TRUE	FALSE	IMEx,IntAct	FALSE	NA	NA	2.19	1495	NA	NA
CPI-SS025CAD24A	BMP10_KIR2DL3	simple:O95393	simple:P43628	ENSG00000163217	ENSG00000273947	TRUE	FALSE	TRUE	IMEx,IntAct	FALSE	NA	NA	1682	1392	NA	NA
CPI-SS04A4A2334	ASGR2_ADIPOQ	simple:P07307	simple:Q15848	ENSG00000161944	ENSG00000181092	TRUE	TRUE	FALSE	IMEx,IntAct	FALSE	NA	NA	0.208	1519	NA	NA
CPI-SS00E3EB9FE	CNR2_ADIPOQ	simple:P34972	simple:Q15848	ENSG00000188822	ENSG00000181092	TRUE	TRUE	FALSE	IMEx,IntAct	FALSE	NA	NA	0.602	1581	NA	NA
CPI-SS0D26F639E	KIR2DL3_CXCL9	simple:P43628	simple:Q07325	ENSG00000273947	ENSG00000138755	TRUE	TRUE	FALSE	IMEx,IntAct	FALSE	NA	NA	0.279	2201	NA	NA
CPI-SS02246DA17	CXCR3_CXCL9	simple:P49682	simple:Q07325	ENSG00000186810	ENSG00000138755	TRUE	TRUE	FALSE	curated	FALSE	NA	NA	0.787	1856	NA	NA
CPI-SS0F52745F3	DPP4_CXCL9	simple:P27487	simple:Q07325	ENSG00000197635	ENSG00000138755	TRUE	TRUE	FALSE	curated	FALSE	NA	NA	0.962	1713	1297	0.791
CPI-SS0C17BB772	FCGR2A_CXCL9	simple:P12318	simple:Q07325	ENSG00000143226	ENSG00000138755	TRUE	TRUE	FALSE	IMEx,IntAct	FALSE	NA	NA	0	1749	1575	0.387
CPI-SS016EE0084	PDCD1_CD274	simple:Q15116	simple:Q9NZQ7	ENSG00000276977	ENSG00000120217	FALSE	TRUE	TRUE	curated	FALSE	NA	NA	0.386	1312	NA	NA
CPI-SS08F13AD5C	CD80_CD274	simple:P33681	simple:Q9NZQ7	ENSG00000121594	ENSG00000120217	FALSE	TRUE	TRUE	curated	FALSE	NA	NA	0.168	1107	0.065	0.205
CPI-CS0E4E75E3B	BMPR1A_BMPR2_BMP2	complex:BMPR1A_BMPR2	simple:P12643		ENSG00000125845	TRUE	TRUE	FALSE	curated	FALSE	NA	NA	0.637	2145	0.441	0
CPI-CS028ACED72	BMPR1B_BMPR2_BMP2	complex:BMPR1B_BMPR2	simple:P12643		ENSG00000125845	TRUE	TRUE	FALSE	curated	FALSE	NA	NA	0	2717	1734	0
CPI-CS075442484	BMR1A_ACR2A_BMP2	complex:BMR1A_ACR2A	simple:P12643		ENSG00000125845	TRUE	TRUE	FALSE	curated	FALSE	NA	NA	0	1346	0.631	2204
CPI-CS0BE59B43E	BMR1A_AVR2B_BMP2	complex:BMR1A_AVR2B	simple:P12643		ENSG00000125845	TRUE	TRUE	FALSE	curated	FALSE	NA	NA	0	0.125	0	1987
CPI-CS08A043594	BMR1B_AVR2A_BMP2	complex:BMR1B_AVR2A	simple:P12643		ENSG00000125845	TRUE	TRUE	FALSE	curated	FALSE	NA	NA	0.278	0.095	0.493	2.18
CPI-CS058910188	BMR1B_AVR2B_BMP2	complex:BMR1B_AVR2B	simple:P12643		ENSG00000125845	TRUE	TRUE	FALSE	curated	FALSE	NA	NA	0	1153	0.532	2021
CPI-CS09F35DDEB	ACVR_1B2A receptor_MSTN	complex:ACVR_1B2A receptor	simple:O14793		ENSG00000138379	TRUE	TRUE	FALSE	curated	FALSE	NA	NA	0	1157	0	2.09
CPI-CS0AED3F8E8	ACVR_1B2B receptor_MSTN	complex:ACVR_1B2B receptor	simple:O14793		ENSG00000138379	TRUE	TRUE	FALSE	curated	FALSE	NA	NA	0.31	1284	1411	0.23
CPI-CS0A66DB1CA	CD8 receptor_LCK	complex:CD8 receptor	simple:P06239		ENSG00000182866	FALSE	TRUE	FALSE	curated	FALSE	NA	NA	0	0	NA	NA
CPI-CS0B0B35928	CNTF-1R_CNTF	complex:CNTF-1R	simple:P26441		ENSG00000242689	TRUE	TRUE	FALSE	curated	FALSE	NA	NA	0.935	0.174	1947	1372
CPI-SS0D795AC00	EGFR_CNTF	simple:P00533	simple:P26441	ENSG00000146648	ENSG00000242689	TRUE	TRUE	FALSE	InnateDB-All	FALSE	NA	NA	3.59	0.606	0	1.05
CPI-CS0EB5F7B6F	CNTF-1R_CLCF1	complex:CNTF-1R	simple:Q9UBD9		ENSG00000175505	TRUE	TRUE	FALSE	curated	FALSE	NA	NA	0.756	0.183	0.102	1243
CPI-SS00EDDD458	EGFR_MIF	simple:P00533	simple:P14174	ENSG00000146648	ENSG00000276701	TRUE	TRUE	FALSE	IMEx,InnateDB-All	FALSE	NA	NA	0.448	0.174	NA	NA
CPI-SS0ABC5C1B8	CD74_MIF	simple:P04233	simple:P14174	ENSG00000019582	ENSG00000276701	TRUE	TRUE	FALSE	I2D,InnateDB-All	FALSE	NA	NA	3103	0.606	NA	NA
CPI-SS0481D83A4	EGFR_AREG	simple:P00533	simple:P15514	ENSG00000146648	ENSG00000109321	TRUE	TRUE	FALSE	curated	FALSE	NA	NA	0.269	0.183	NA	NA
CPI-SS0D4C221B8	ICAM1_AREG	simple:P05362	simple:P15514	ENSG00000090339	ENSG00000109321	TRUE	TRUE	FALSE	InnateDB-All	FALSE	NA	NA	0.678	0.174	NA	NA
CPI-SS07F042076	EGFR_EPGN	simple:P00533	simple:Q6UW88	ENSG00000146648	ENSG00000182585	TRUE	TRUE	FALSE	curated	FALSE	NA	NA	3333	0.606	NA	NA
CPI-SC0329D5397	ICAM3_aLb2 complex	simple:P32942	complex:aLb2 complex	ENSG00000076662		FALSE	FALSE	FALSE	curated	TRUE	NA	NA	0.499	0.183	NA	NA
CPI-SS0ADA587B4	NGFR_NTF3	simple:P08138	simple:P20783	ENSG00000064300	ENSG00000185652	TRUE	TRUE	FALSE	curated	FALSE	NA	NA	0.515	0.183	NA	NA
CPI-SS06F83AE58	CD44_SELE	simple:P16070	simple:P16581	ENSG00000026508	ENSG00000007908	FALSE	TRUE	FALSE	curated	FALSE	NA	NA	1838	0.098	0.14	1084
CPI-SS0BDC04683	CEACAM1_SELE	simple:P13688	simple:P16581	ENSG00000079385	ENSG00000007908	TRUE	FALSE	FALSE	curated	FALSE	NA	NA	0	2961	0	1153
CPI-SS04C8BC444	KLRF2_CLEC2A	simple:D3W0D1	simple:Q6UVW9	ENSG00000256797	ENSG00000188393	FALSE	TRUE	TRUE	curated	FALSE	NA	NA	0	2671	NA	NA
CPI-CS0C9EE65C2	FcRn complex_ALB	complex:FcRn complex	simple:P02768		ENSG00000163631	TRUE	TRUE	FALSE	curated	FALSE	NA	NA	0.91	2791	0	0
CPI-CS0210859AB	GMCSFR_CSF2	complex:GMCSFR	simple:P04141		ENSG00000164400	TRUE	TRUE	FALSE	curated	FALSE	NA	NA	0.861	2505	NA	NA
CPI-SS00F977575	BMP10_KIR3DL1	simple:O95393	simple:P43629	ENSG00000163217	ENSG00000273775	TRUE	FALSE	TRUE	IMEx,IntAct	FALSE	NA	NA	0	0.371	NA	NA
CPI-SS0B26EEF21	BMP10_GPR152	simple:O95393	simple:Q8TDT2	ENSG00000163217	ENSG00000175514	TRUE	FALSE	TRUE	IMEx,IntAct	FALSE	NA	NA	0	0	NA	NA
CPI-SS0268D47AD	CCL4_GPR152	simple:P13236	simple:Q8TDT2	ENSG00000277943	ENSG00000175514	TRUE	FALSE	TRUE	IMEx,IntAct	FALSE	NA	NA	0.567	0	NA	NA
CPI-SS016B111FE	IGF2_GPR152	simple:P01344	simple:Q8TDT2	ENSG00000167244	ENSG00000175514	TRUE	FALSE	TRUE	IMEx,IntAct	FALSE	NA	NA	0	0	NA	NA
CPI-SS000171CB7	IFNA8_GPR152	simple:P32881	simple:Q8TDT2	ENSG00000120242	ENSG00000175514	TRUE	FALSE	TRUE	IMEx,IntAct	FALSE	NA	NA	0	0	NA	NA
CPI-SS0E1389B57	ADIPOQ_GPR152	simple:Q15848	simple:Q8TDT2	ENSG00000181092	ENSG00000175514	TRUE	FALSE	TRUE	IMEx,IntAct	FALSE	NA	NA	0	0.051	NA	NA
CPI-SS0576E6C7D	BMP10_VSIR	simple:O95393	simple:Q9H7M9	ENSG00000163217	ENSG00000107738	TRUE	FALSE	TRUE	IMEx,IntAct	FALSE	NA	NA	0	0.089	NA	NA
CPI-SS03FA58286	TNF_VSIR	simple:P01375	simple:Q9H7M9	ENSG00000228978	ENSG00000107738	TRUE	FALSE	TRUE	IMEx,IntAct	FALSE	NA	NA	0	0.169	NA	NA
CPI-SS0D1D95883	CCL4_CCR5	simple:P13236	simple:P51681	ENSG00000277943	ENSG00000160791	TRUE	FALSE	TRUE	curated	FALSE	NA	NA	0	0.1	NA	NA
CPI-SS0C090A257	CCL3_CCR5	simple:P10147	simple:P51681	ENSG00000278567	ENSG00000160791	TRUE	FALSE	TRUE	curated	FALSE	NA	NA	0	0.065	NA	NA
CPI-SS0795802F6	CCL4_SLC7A1	simple:P13236	simple:P30825	ENSG00000277943	ENSG00000139514	TRUE	FALSE	TRUE	IMEx,IntAct	FALSE	NA	NA	0	0.159	NA	NA
CPI-SS05BA6D9C3	CCL4_CNR2	simple:P13236	simple:P34972	ENSG00000277943	ENSG00000188822	TRUE	FALSE	TRUE	IMEx,IntAct	FALSE	NA	NA	0	0	NA	NA
CPI-SS008F83E02	CCL4_GPRC5D	simple:P13236	simple:Q9NZD1	ENSG00000277943	ENSG00000111291	TRUE	FALSE	TRUE	IMEx,IntAct	FALSE	NA	NA	0	0	NA	NA
CPI-SS0A3569604	IGF2_IDE	simple:P01344	simple:P14735	ENSG00000167244	ENSG00000119912	TRUE	FALSE	TRUE	I2D,InnateDB-All	FALSE	NA	NA	0	0	NA	NA
CPI-SS076D8415B	CCL3_IDE	simple:P10147	simple:P14735	ENSG00000278567	ENSG00000119912	TRUE	FALSE	TRUE	IMEx,InnateDB-All,MINT	FALSE	NA	NA	0	0	NA	NA
CPI-SS01A29DD97	GCG_IDE	simple:P01275	simple:P14735	ENSG00000115263	ENSG00000119912	TRUE	FALSE	TRUE	IMEx	FALSE	NA	NA	0.367	2417	0.36	0
CPI-SS0FC2B68F1	IAPP_IDE	simple:P10997	simple:P14735	ENSG00000121351	ENSG00000119912	TRUE	FALSE	TRUE	IMEx	FALSE	NA	NA	0	0.074	0.398	0
CPI-SS0579FA162	IGF2_IGF1R	simple:P01344	simple:P08069	ENSG00000167244	ENSG00000140443	TRUE	FALSE	TRUE	curated	FALSE	NA	NA	0.204	0.057	NA	NA
CPI-SS042A6F835	IGF2_IGF2R	simple:P01344	simple:P11717	ENSG00000167244	ENSG00000197081	TRUE	FALSE	TRUE	curated	FALSE	NA	NA	0	0	NA	NA
CPI-SS088C1035B	NTF4_NTRK2	simple:P34130	simple:Q16620	ENSG00000225950	ENSG00000148053	TRUE	FALSE	TRUE	I2D,IMEx,InnateDB-All,IntAct	FALSE	NA	NA	0.195	0	0	0
CPI-SC09AF1889C	IFNA8_Type I IFNR	simple:P32881	complex:Type I IFNR	ENSG00000120242		TRUE	FALSE	TRUE	curated	FALSE	NA	NA	0	0.146	3612	0.344
CPI-SC064937925	IFNA1_Type I IFNR	simple:P01562	complex:Type I IFNR	ENSG00000197919		TRUE	FALSE	TRUE	curated	FALSE	NA	NA	0.205	0.129	NA	NA
CPI-SC0B4211EFF	IFNA2_Type I IFNR	simple:P01563	complex:Type I IFNR	ENSG00000188379		TRUE	FALSE	TRUE	curated	FALSE	NA	NA	0	0.599	NA	NA
CPI-SC0A8A78670	IFNA21_Type I IFNR	simple:P01568	complex:Type I IFNR	ENSG00000137080		TRUE	FALSE	TRUE	curated	FALSE	NA	NA	0.112	0.581	NA	NA
CPI-SC09458C6C0	IFNA5_Type I IFNR	simple:P01569	complex:Type I IFNR	ENSG00000147873		TRUE	FALSE	TRUE	curated	FALSE	NA	NA	0	0.107	0	0.344
CPI-SC0AF90F422	IFNA14_Type I IFNR	simple:P01570	complex:Type I IFNR	ENSG00000228083		TRUE	FALSE	TRUE	curated	FALSE	NA	NA	0.33	0.089	0.164	1082
CPI-SC07A2679B1	IFNA17_Type I IFNR	simple:P01571	complex:Type I IFNR	ENSG00000234829		TRUE	FALSE	TRUE	curated	FALSE	NA	NA	1835	0.317	NA	NA
CPI-SC091D10DFA	IFNB1_Type I IFNR	simple:P01574	complex:Type I IFNR	ENSG00000171855		TRUE	FALSE	TRUE	curated	FALSE	NA	NA	0.402	0.262	NA	NA
CPI-SC0C1B5BAA1	IFNA6_Type I IFNR	simple:P05013	complex:Type I IFNR	ENSG00000120235		TRUE	FALSE	TRUE	curated	FALSE	NA	NA	2311	0.231	1681	1102
CPI-SC0D089F0A9	IFNK_Type I IFNR	simple:Q9P0W0	complex:Type I IFNR	ENSG00000147896		TRUE	FALSE	TRUE	curated	FALSE	NA	NA	0.813	3995	NA	NA
CPI-SS04A8E4200	ADIPOQ_CD200R1	simple:Q15848	simple:Q8TD46	ENSG00000181092	ENSG00000163606	TRUE	FALSE	TRUE	IMEx,IntAct	FALSE	NA	NA	0	3617	NA	NA
CPI-SS0A9E884E0	CD200_CD200R1	simple:P41217	simple:Q8TD46	ENSG00000091972	ENSG00000163606	TRUE	FALSE	TRUE	curated	FALSE	NA	NA	0.834	1589	2356	1335
CPI-SS0518D683C	ADIPOQ_PROKR2	simple:Q15848	simple:Q8NFJ6	ENSG00000181092	ENSG00000101292	TRUE	FALSE	TRUE	IMEx,IntAct	FALSE	NA	NA	0	1211	NA	NA
CPI-SS04465565A	PROK1_PROKR2	simple:P58294	simple:Q8NFJ6	ENSG00000143125	ENSG00000101292	TRUE	FALSE	TRUE	guidetopharmacology.org	FALSE	NA	NA	0.433	0	NA	NA
CPI-SS06E42DB13	ADIPOQ_CLEC2D	simple:Q15848	simple:Q9UHP7	ENSG00000181092	ENSG00000069493	TRUE	FALSE	TRUE	IMEx,IntAct	FALSE	NA	NA	0	0	NA	NA
CPI-SS0E292C126	KLRB1_CLEC2D	simple:Q12918	simple:Q9UHP7	ENSG00000111796	ENSG00000069493	FALSE	TRUE	TRUE	curated	FALSE	NA	NA	0.158	0	NA	NA
CPI-SS0471FCFF3	GAL_GPR151	simple:P22466	simple:Q8TDV0	ENSG00000069482	ENSG00000173250	TRUE	FALSE	TRUE	I2D	FALSE	NA	NA	0	0	0	1.09
CPI-SS0F8EFEECF	TNF_DAG1	simple:P01375	simple:Q14118	ENSG00000228978	ENSG00000173402	TRUE	FALSE	TRUE	InnateDB-All	FALSE	NA	NA	0	0	NA	NA
CPI-SS02EBC1BB0	TNF_NOTCH1	simple:P01375	simple:P46531	ENSG00000228978	ENSG00000148400	TRUE	FALSE	TRUE	I2D	FALSE	NA	NA	0.146	0	NA	NA
CPI-SS0B81F1BF5	TNF_SEMA4C	simple:P01375	simple:Q9C0C4	ENSG00000228978	ENSG00000168758	TRUE	FALSE	TRUE	InnateDB-All	FALSE	NA	NA	0	0	NA	NA
CPI-SS09C917D22	TNF_FLT4	simple:P01375	simple:P35916	ENSG00000228978	ENSG00000037280	TRUE	FALSE	TRUE	InnateDB-All	FALSE	NA	NA	0	0	NA	NA
CPI-SS03B8E2D7A	TNF_ICOS	simple:P01375	simple:Q9Y6W8	ENSG00000228978	ENSG00000163600	TRUE	FALSE	TRUE	InnateDB-All	FALSE	NA	NA	0	0	NA	NA
CPI-SS0E4B1484B	ICOSLG_ICOS	simple:O75144	simple:Q9Y6W8	ENSG00000160223	ENSG00000163600	TRUE	FALSE	TRUE	curated	FALSE	NA	NA	0	0	NA	NA
CPI-SS04B4619D0	TNF_TNFRSF1A	simple:P01375	simple:P19438	ENSG00000228978	ENSG00000067182	TRUE	FALSE	TRUE	curated	FALSE	NA	NA	0	0	NA	NA
CPI-SS084BE3E4B	LTA_TNFRSF1A	simple:P01374	simple:P19438	ENSG00000230279	ENSG00000067182	TRUE	FALSE	TRUE	curated	FALSE	NA	NA	0	0	NA	NA
CPI-SS0F9B3B259	TNFSF13_TNFRSF1A	simple:O75888	simple:P19438	ENSG00000161955	ENSG00000067182	TRUE	FALSE	TRUE	I2D,InnateDB-All	FALSE	NA	NA	0	0	NA	NA
CPI-SS08B7D54A3	TNF_FAS	simple:P01375	simple:P25445	ENSG00000228978	ENSG00000026103	TRUE	FALSE	TRUE	InnateDB-All	FALSE	NA	NA	0	3487	NA	NA
CPI-SS0A83A7E30	TNFSF13_FAS	simple:O75888	simple:P25445	ENSG00000161955	ENSG00000026103	TRUE	FALSE	TRUE	I2D,InnateDB-All	FALSE	NA	NA	0	3135	NA	NA
CPI-SS0E7D5974D	TNF_TNFRSF1B	simple:P01375	simple:P20333	ENSG00000228978	ENSG00000028137	TRUE	FALSE	TRUE	curated	FALSE	NA	NA	0.09	1018	NA	NA
CPI-SS07D9A48A2	LTA_TNFRSF1B	simple:P01374	simple:P20333	ENSG00000230279	ENSG00000028137	TRUE	FALSE	TRUE	curated	FALSE	NA	NA	1576	0	NA	NA
CPI-SS048A2311A	TNF_RIPK1	simple:P01375	simple:Q13546	ENSG00000228978	ENSG00000137275	TRUE	FALSE	TRUE	I2D,IMEx,InnateDB,InnateDB-All,IntAct,MINT	FALSE	NA	NA	1613	0	NA	NA
CPI-SS0D5C54214	LTA_RIPK1	simple:P01374	simple:Q13546	ENSG00000230279	ENSG00000137275	TRUE	FALSE	TRUE	IMEx,InnateDB-All,MINT	FALSE	NA	NA	1534	0	NA	NA
CPI-SS0FBC9234C	TNF_PTPRS	simple:P01375	simple:Q13332	ENSG00000228978	ENSG00000105426	TRUE	FALSE	TRUE	InnateDB-All	FALSE	NA	NA	1543	0	NA	NA
CPI-SS034B442CE	TNF_CELSR2	simple:P01375	simple:Q9HCU4	ENSG00000228978	ENSG00000143126	TRUE	FALSE	TRUE	InnateDB-All	FALSE	NA	NA	0.058	0	NA	NA
CPI-SS0EA96C304	CCK_CCKAR	simple:P06307	simple:P32238	ENSG00000187094	ENSG00000163394	TRUE	FALSE	TRUE	guidetopharmacology.org	FALSE	NA	NA	0	0.186	NA	NA
CPI-SS003610FF9	CXCR3_CCL19	simple:P49682	simple:Q99731	ENSG00000186810	ENSG00000172724	TRUE	TRUE	FALSE	guidetopharmacology.org	FALSE	NA	NA	1529	0	NA	NA
CPI-SS056BE1011	CCRL2_CCL19	simple:O00421	simple:Q99731	ENSG00000121797	ENSG00000172724	TRUE	TRUE	FALSE	guidetopharmacology.org	FALSE	NA	NA	0	0	NA	NA
CPI-SS098EFF959	CCR7_CCL19	simple:P32248	simple:Q99731	ENSG00000126353	ENSG00000172724	TRUE	TRUE	FALSE	curated	FALSE	NA	NA	0	0	NA	NA
CPI-SS0F8C664D9	CXCR3_CCL20	simple:P49682	simple:P78556	ENSG00000186810	ENSG00000115009	TRUE	TRUE	FALSE	guidetopharmacology.org	FALSE	NA	NA	1051	0	NA	NA
CPI-SS0FAF4BB9E	DPP4_CCL11	simple:P27487	simple:P51671	ENSG00000197635	ENSG00000172156	TRUE	TRUE	FALSE	curated	FALSE	NA	NA	0	0	NA	NA
CPI-SS08E13FAF2	ACKR2_CCL11	simple:O00590	simple:P51671	ENSG00000144648	ENSG00000172156	TRUE	TRUE	FALSE	curated	FALSE	NA	NA	0	0	NA	NA
CPI-SS0DD547726	CCR2_CCL11	simple:P41597	simple:P51671	ENSG00000121807	ENSG00000172156	TRUE	TRUE	FALSE	guidetopharmacology.org	FALSE	NA	NA	1579	0	NA	NA
CPI-SS0DCA69916	TNFRSF13B_TNFSF13	simple:O14836	simple:O75888	ENSG00000240505	ENSG00000161955	TRUE	TRUE	FALSE	curated	FALSE	NA	NA	0	0	NA	NA
CPI-SS083296041	CD40_CD40LG	simple:P25942	simple:P29965	ENSG00000101017	ENSG00000102245	TRUE	TRUE	FALSE	curated	FALSE	NA	NA	1101	0	NA	NA
CPI-CS06072FF4E	IL1 receptor_IL1A	complex:IL1 receptor	simple:P01583		ENSG00000115008	TRUE	TRUE	FALSE	curated	FALSE	NA	NA	1517	0	0	0.706
CPI-CS0AC5142FA	IL1 receptor inhibitor_IL1A	complex:IL1 receptor inhibitor	simple:P01583		ENSG00000115008	TRUE	TRUE	FALSE	curated	FALSE	NA	NA	0	0	0.093	0.159
CPI-CS05426BFFA	IL1 receptor_IL1B	complex:IL1 receptor	simple:P01584		ENSG00000125538	TRUE	TRUE	FALSE	curated	FALSE	NA	NA	0	0	0.23	0
CPI-CS008C9D6E5	IL1 receptor inhibitor_IL1B	complex:IL1 receptor inhibitor	simple:P01584		ENSG00000125538	TRUE	TRUE	FALSE	curated	FALSE	NA	NA	1038	0	0	0.206
CPI-CS04CBDE052	IL10 receptor_IL10	complex:IL10 receptor	simple:P22301		ENSG00000136634	TRUE	TRUE	FALSE	curated	FALSE	NA	NA	1.71	0	NA	NA
CPI-CS0DDFD82E7	IL11 receptor_IL11	complex:IL11 receptor	simple:P20809		ENSG00000095752	TRUE	TRUE	FALSE	curated	FALSE	NA	NA	1231	0	0	0
CPI-CC0041E1D30	IL12_IL12 receptor	complex:IL12	complex:IL12 receptor			TRUE	FALSE	TRUE	curated	FALSE	NA	NA	0	0	NA	NA
CPI-CS0EE8AEA34	IL13 receptor_IL13	complex:IL13 receptor	simple:P35225		ENSG00000169194	TRUE	TRUE	FALSE	curated	FALSE	NA	NA	1511	0.405	0	0
CPI-CC0B39F327D	IL17 AF_IL17 receptor AC	complex:IL17 AF	complex:IL17 receptor AC			TRUE	FALSE	TRUE	curated	FALSE	NA	NA	0	0.288	NA	NA
CPI-CS04F158618	IL17 receptor AC_IL17A	complex:IL17 receptor AC	simple:Q16552		ENSG00000112115	TRUE	TRUE	FALSE	curated	FALSE	NA	NA	0	0	NA	NA
CPI-CS0558AB6A5	IL17 receptor AC_IL17F	complex:IL17 receptor AC	simple:Q96PD4		ENSG00000112116	TRUE	TRUE	FALSE	curated	FALSE	NA	NA	0	0	0.449	2758
CPI-CS09831CCFD	IL18 receptor_IL18	complex:IL18 receptor	simple:Q14116		ENSG00000150782	TRUE	TRUE	FALSE	curated	FALSE	NA	NA	1059	0	NA	NA
CPI-CS0D48BE017	IL2 receptor_HA_IL2	complex:IL2 receptor_HA	simple:P60568		ENSG00000109471	TRUE	TRUE	FALSE	curated	FALSE	NA	NA	0	0	NA	NA
CPI-CS0A34112A6	IL2 receptor_I_IL2	complex:IL2 receptor_I	simple:P60568		ENSG00000109471	TRUE	TRUE	FALSE	curated	FALSE	NA	NA	2.07	0	NA	NA
CPI-SS09F430F14	NGFR_IL2	simple:P08138	simple:P60568	ENSG00000064300	ENSG00000109471	TRUE	TRUE	FALSE	I2D	FALSE	NA	NA	0	0	0.521	2191
CPI-SS0A93C11C8	NGFR_BDNF	simple:P08138	simple:P23560	ENSG00000064300	ENSG00000176697	TRUE	TRUE	FALSE	curated	FALSE	NA	NA	0	0	0.699	4244
CPI-SS0BA3A1C3A	NGFR_NTF4	simple:P08138	simple:P34130	ENSG00000064300	ENSG00000225950	TRUE	TRUE	FALSE	curated	FALSE	NA	NA	0	0	0.892	1323
CPI-SS0C23EF34B	NCAM1_GDNF	simple:P13591	simple:P39905	ENSG00000149294	ENSG00000168621	TRUE	TRUE	FALSE	I2D	FALSE	NA	NA	1033	0	NA	NA
CPI-CS0553FFC41	IL20 receptor Type I_IL24	complex:IL20 receptor Type I	simple:Q13007		ENSG00000162892	TRUE	TRUE	FALSE	curated	FALSE	NA	NA	2481	0	4762	1164
CPI-CS0CF47221A	IL20 receptor Type II_IL24	complex:IL20 receptor Type II	simple:Q13007		ENSG00000162892	TRUE	TRUE	FALSE	curated	FALSE	NA	NA	0.107	0	0.105	0
CPI-CS0AB365861	IL20 receptor Type I_IL20	complex:IL20 receptor Type I	simple:Q9NYY1		ENSG00000162891	TRUE	TRUE	FALSE	curated	FALSE	NA	NA	0	0	NA	NA
CPI-CS0E8ADC968	IL20 receptor Type II_IL20	complex:IL20 receptor Type II	simple:Q9NYY1		ENSG00000162891	TRUE	TRUE	FALSE	curated	FALSE	NA	NA	0.433	0	NA	NA
CPI-CS0645666B0	IL20 receptor Type I_IL19	complex:IL20 receptor Type I	simple:Q9UHD0		ENSG00000142224	TRUE	TRUE	FALSE	curated	FALSE	NA	NA	0	0	0	0.705
CPI-SS0B42AD9EF	NOTCH1_WNT4	simple:P46531	simple:P56705	ENSG00000148400	ENSG00000162552	TRUE	TRUE	FALSE	I2D	FALSE	NA	NA	0	0	0	1453
CPI-SS0FA326344	FZD6_WNT4	simple:O60353	simple:P56705	ENSG00000164930	ENSG00000162552	TRUE	TRUE	FALSE	curated	FALSE	NA	NA	0	0.068	0.215	0
CPI-SS0E5AF12B6	NOTCH1_NOV	simple:P46531	simple:P48745	ENSG00000148400	ENSG00000136999	TRUE	TRUE	FALSE	I2D,InnateDB-All	FALSE	NA	NA	0	0.046	NA	NA
CPI-CS0E80B08E2	IL21 receptor_IL21	complex:IL21 receptor	simple:Q9HBE4		ENSG00000138684	TRUE	TRUE	FALSE	curated	FALSE	NA	NA	0.51	0.386	NA	NA
CPI-CS0A8A0A053	IL22 receptor_IL22	complex:IL22 receptor	simple:Q9GZX6		ENSG00000127318	TRUE	TRUE	FALSE	curated	FALSE	NA	NA	0.522	3586	NA	NA
CPI-CS0317FAF76	IL26 receptor_IL26	complex:IL26 receptor	simple:Q9NPH9		ENSG00000111536	TRUE	TRUE	FALSE	curated	FALSE	NA	NA	0	3603	NA	NA
CPI-CS0A659AAAD	IL28 receptor_IFNL3	complex:IL28 receptor	simple:Q8IZI9		ENSG00000197110	TRUE	TRUE	FALSE	curated	FALSE	NA	NA	0	3579	NA	NA
CPI-CS03037FE90	IL3 receptor_IL3	complex:IL3 receptor	simple:P08700		ENSG00000164399	TRUE	TRUE	FALSE	curated	FALSE	NA	NA	0	3511	NA	NA
CPI-CC0C3ECBD1F	IL35_IL35 receptor	complex:IL35	complex:IL35 receptor			TRUE	FALSE	TRUE	curated	FALSE	NA	NA	2583	3665	NA	NA
CPI-CS04C628758	IL36 receptor_IL1F10	complex:IL36 receptor	simple:Q8WWZ1		ENSG00000136697	TRUE	TRUE	FALSE	curated	FALSE	NA	NA	0	0	NA	NA
CPI-CS0D9B5AB86	IL36 receptor_IL36G	complex:IL36 receptor	simple:Q9NZH8		ENSG00000136688	TRUE	TRUE	FALSE	curated	FALSE	NA	NA	2.36	0.307	NA	NA
CPI-CS04BB8F1EC	IL36 receptor_IL36RN	complex:IL36 receptor	simple:Q9UBH0		ENSG00000136695	TRUE	TRUE	FALSE	curated	FALSE	NA	NA	0.318	0.195	NA	NA
CPI-CS0F6472748	IL36 receptor_IL36A	complex:IL36 receptor	simple:Q9UHA7		ENSG00000136694	TRUE	TRUE	FALSE	curated	FALSE	NA	NA	2148	0.601	NA	NA
CPI-CS040DDEBFB	IL37 receptor_IL37	complex:IL37 receptor	simple:Q9NZH6		ENSG00000125571	TRUE	TRUE	FALSE	curated	FALSE	NA	NA	2283	1946	0	2.57
CPI-CS0FB8775FC	IL5 receptor_IL5	complex:IL5 receptor	simple:P05113		ENSG00000113525	TRUE	TRUE	FALSE	curated	FALSE	NA	NA	2274	0	NA	NA
CPI-CS063AE1C91	IL6 receptor_IL6	complex:IL6 receptor	simple:P05231		ENSG00000136244	TRUE	TRUE	FALSE	curated	FALSE	NA	NA	2497	1151	NA	NA
CPI-CS0E661878B	LIFR_OSM	complex:LIFR	simple:P13725		ENSG00000099985	TRUE	TRUE	FALSE	curated	FALSE	NA	NA	0	0.925	NA	NA
CPI-CS06D50EBF8	OSMR_OSM	complex:OSMR	simple:P13725		ENSG00000099985	TRUE	TRUE	FALSE	curated	FALSE	NA	NA	0	1.14	NA	NA
CPI-CS07B61574B	LIFR_LIF	complex:LIFR	simple:P15018		ENSG00000128342	TRUE	TRUE	FALSE	curated	FALSE	NA	NA	3348	1096	NA	NA
CPI-CS0A9D23000	NKG2D II receptor_MICB	complex:NKG2D II receptor	simple:Q29980		ENSG00000231179	FALSE	TRUE	FALSE	curated	FALSE	NA	NA	0	0	NA	NA
CPI-CS06C6E2321	NKG2D II receptor_MICA	complex:NKG2D II receptor	simple:Q29983		ENSG00000233051	FALSE	TRUE	FALSE	curated	FALSE	NA	NA	0	0	NA	NA
CPI-CS08F4E5D70	NKG2D II receptor_RAET1L	complex:NKG2D II receptor	simple:Q5VY80		ENSG00000155918	FALSE	TRUE	FALSE	curated	FALSE	NA	NA	3154	0	NA	NA
CPI-CS0A71F2AAD	NKG2D II receptor_RAET1G	complex:NKG2D II receptor	simple:Q6H3X3		ENSG00000203722	TRUE	TRUE	FALSE	curated	FALSE	NA	NA	0	0	NA	NA
CPI-CS09F211C3E	NKG2D II receptor_RAET1E	complex:NKG2D II receptor	simple:Q8TD07		ENSG00000164520	TRUE	TRUE	FALSE	curated	FALSE	NA	NA	0	0.656	NA	NA
CPI-CS0A269FA16	NKG2D II receptor_ULBP2	complex:NKG2D II receptor	simple:Q9BZM5		ENSG00000131015	TRUE	TRUE	FALSE	curated	FALSE	NA	NA	0	1122	NA	NA
CPI-CS0007697A7	NKG2D II receptor_ULBP1	complex:NKG2D II receptor	simple:Q9BZM6		ENSG00000111981	FALSE	TRUE	TRUE	curated	FALSE	NA	NA	0	0.064	NA	NA
CPI-SS05C2D0200	FZD9_WNT1	simple:O00144	simple:P04628	ENSG00000188763	ENSG00000125084	TRUE	TRUE	FALSE	I2D	FALSE	NA	NA	0.538	1771	0.148	0.407
CPI-SS09FF3A1EA	FZD9_WNT2	simple:O00144	simple:P09544	ENSG00000188763	ENSG00000105989	TRUE	TRUE	FALSE	curated	FALSE	NA	NA	1111	0.485	0.825	2143
CPI-SS0EECD7662	GPR25_RETN	simple:O00155	simple:Q9HD89	ENSG00000170128	ENSG00000104918	TRUE	TRUE	FALSE	IMEx,IntAct	FALSE	NA	NA	0	0.349	NA	NA
CPI-SS093922D5A	CCL16_CCR2	simple:O15467	simple:P41597	ENSG00000275095	ENSG00000121807	TRUE	FALSE	TRUE	curated	FALSE	NA	NA	0.746	0.915	1432	0
CPI-SS08BFF4F9B	CCL3_CCR3	simple:P10147	simple:P51677	ENSG00000278567	ENSG00000183625	TRUE	FALSE	TRUE	curated	FALSE	NA	NA	0	1845	NA	NA
CPI-SS0F33890C0	CCL11_CCR3	simple:P51671	simple:P51677	ENSG00000172156	ENSG00000183625	TRUE	FALSE	TRUE	curated	FALSE	NA	NA	0.112	1656	NA	NA
CPI-SS0348B76E5	CCL16_CCR1	simple:O15467	simple:P32246	ENSG00000275095	ENSG00000163823	TRUE	FALSE	TRUE	curated	FALSE	NA	NA	0.167	1933	NA	NA
CPI-SS08DA48A5A	CCL3_CCR1	simple:P10147	simple:P32246	ENSG00000278567	ENSG00000163823	TRUE	FALSE	TRUE	curated	FALSE	NA	NA	0	0.385	NA	NA
CPI-SS04587A7C5	CCL16_HRH4	simple:O15467	simple:Q9H3N8	ENSG00000275095	ENSG00000134489	TRUE	FALSE	TRUE	guidetopharmacology.org	FALSE	NA	NA	0.481	0.473	1347	0
CPI-SS0DBFB8BEA	CCL2_ACKR1	simple:P13500	simple:Q16570	ENSG00000108691	ENSG00000213088	TRUE	FALSE	TRUE	curated	FALSE	NA	NA	0	0.158	2403	0
CPI-SS05B7D3407	CCL5_ACKR1	simple:P13501	simple:Q16570	ENSG00000274233	ENSG00000213088	TRUE	FALSE	TRUE	curated	FALSE	NA	NA	0.39	0.229	0	0
CPI-SS052BBD9F9	CXCL1_ACKR1	simple:P09341	simple:Q16570	ENSG00000163739	ENSG00000213088	TRUE	FALSE	TRUE	curated	FALSE	NA	NA	1946	0.292	0.138	0
CPI-SS0911EECCC	CXCL8_ACKR1	simple:P10145	simple:Q16570	ENSG00000169429	ENSG00000213088	TRUE	FALSE	TRUE	curated	FALSE	NA	NA	1706	0.221	NA	NA
CPI-SS0ABF41CAA	CXCL5_ACKR1	simple:P42830	simple:Q16570	ENSG00000163735	ENSG00000213088	TRUE	FALSE	TRUE	I2D	FALSE	NA	NA	0	0.463	NA	NA
CPI-SS07EC65CED	CCL7_ACKR1	simple:P80098	simple:Q16570	ENSG00000108688	ENSG00000213088	TRUE	FALSE	TRUE	I2D	FALSE	NA	NA	0.142	0.551	NA	NA
CPI-SS08B249DBA	CCL2_CCR10	simple:P13500	simple:P46092	ENSG00000108691	ENSG00000184451	TRUE	FALSE	TRUE	I2D	FALSE	NA	NA	0	0.236	NA	NA
CPI-SS0EA05941A	CCL5_CCR4	simple:P13501	simple:P51679	ENSG00000274233	ENSG00000183813	TRUE	FALSE	TRUE	curated	FALSE	NA	NA	0.051	0.307	0.88	0.827
CPI-SS052B38F1C	CCL22_CCR4	simple:O00626	simple:P51679	ENSG00000102962	ENSG00000183813	TRUE	FALSE	TRUE	curated	FALSE	NA	NA	1607	0.37	NA	NA
CPI-SS006FB5198	GCG_DPP4	simple:P01275	simple:P27487	ENSG00000115263	ENSG00000197635	TRUE	FALSE	TRUE	InnateDB-All,MINT	FALSE	NA	NA	1366	0.3	0.88	0
CPI-SS0F9BBC31B	VIP_DPP4	simple:P01282	simple:P27487	ENSG00000146469	ENSG00000197635	TRUE	FALSE	TRUE	InnateDB-All,MINT	FALSE	NA	NA	0.086	0.274	NA	NA
CPI-SS0FDAB7BA8	CXCL10_DPP4	simple:P02778	simple:P27487	ENSG00000169245	ENSG00000197635	TRUE	FALSE	TRUE	curated	FALSE	NA	NA	0.252	0.182	NA	NA
CPI-SS0FAE7ABEF	PYY_DPP4	simple:P10082	simple:P27487	ENSG00000131096	ENSG00000197635	TRUE	FALSE	TRUE	InnateDB-All,MINT	FALSE	NA	NA	1689	0.076	NA	NA
CPI-SS0CDAC688B	CXCL2_DPP4	simple:P19875	simple:P27487	ENSG00000081041	ENSG00000197635	TRUE	FALSE	TRUE	curated	FALSE	NA	NA	0.27	2441	NA	NA
CPI-SS09FAC4977	CXCL11_CXCR3	simple:O14625	simple:P49682	ENSG00000169248	ENSG00000186810	TRUE	FALSE	TRUE	curated	FALSE	NA	NA	0.198	2185	NA	NA
CPI-SS080683E15	CXCL10_CXCR3	simple:P02778	simple:P49682	ENSG00000169245	ENSG00000186810	TRUE	FALSE	TRUE	curated	FALSE	NA	NA	0	2176	NA	NA
CPI-SS0EFE0B07A	CXCL12_CXCR3	simple:P48061	simple:P49682	ENSG00000107562	ENSG00000186810	TRUE	FALSE	TRUE	guidetopharmacology.org	FALSE	NA	NA	0.27	2187	NA	NA
CPI-SS0C62E5DD8	CXCL1_CXCR1	simple:P09341	simple:P25024	ENSG00000163739	ENSG00000163464	TRUE	FALSE	TRUE	curated	FALSE	NA	NA	0.723	2094	0.842	0.835
CPI-SS0698C4DC4	CXCL8_CXCR1	simple:P10145	simple:P25024	ENSG00000169429	ENSG00000163464	TRUE	FALSE	TRUE	curated	FALSE	NA	NA	1618	0	NA	NA
CPI-SS040630206	CXCL2_CXCR1	simple:P19875	simple:P25024	ENSG00000081041	ENSG00000163464	TRUE	FALSE	TRUE	I2D	FALSE	NA	NA	1752	1632	NA	NA
CPI-SS0D04AE221	CXCL3_CXCR1	simple:P19876	simple:P25024	ENSG00000163734	ENSG00000163464	TRUE	FALSE	TRUE	I2D	FALSE	NA	NA	0.284	1709	NA	NA
CPI-SS08102DC9E	CXCL1_CXCR2	simple:P09341	simple:P25025	ENSG00000163739	ENSG00000180871	TRUE	FALSE	TRUE	curated	FALSE	NA	NA	0	1.7	0	1089
CPI-SS0315F51DD	CXCL8_CXCR2	simple:P10145	simple:P25025	ENSG00000169429	ENSG00000180871	TRUE	FALSE	TRUE	curated	FALSE	NA	NA	0.356	1.71	NA	NA
CPI-SS0F562FEA5	CXCL2_CXCR2	simple:P19875	simple:P25025	ENSG00000081041	ENSG00000180871	TRUE	FALSE	TRUE	curated	FALSE	NA	NA	0.809	1617	NA	NA
CPI-SS0C491A3C1	PPBP_CXCR2	simple:P02775	simple:P25025	ENSG00000163736	ENSG00000180871	TRUE	FALSE	TRUE	curated	FALSE	NA	NA	0.229	0.276	NA	NA
CPI-SS09185EA8F	CXCL3_CXCR2	simple:P19876	simple:P25025	ENSG00000163734	ENSG00000180871	TRUE	FALSE	TRUE	curated	FALSE	NA	NA	0	0.267	NA	NA
CPI-SS00D9A2FD0	IAPP_CALCR	simple:P10997	simple:P30988	ENSG00000121351	ENSG00000004948	TRUE	FALSE	TRUE	guidetopharmacology.org	FALSE	NA	NA	0.302	0.277	0	0
CPI-SS06C0074BD	CCL21_CCR7	simple:O00585	simple:P32248	ENSG00000137077	ENSG00000126353	TRUE	FALSE	TRUE	curated	FALSE	NA	NA	0.754	0.184	NA	NA
CPI-SS039863E62	CCL25_CCR9	simple:O15444	simple:P51686	ENSG00000131142	ENSG00000173585	TRUE	FALSE	TRUE	curated	FALSE	NA	NA	0	0	NA	NA
CPI-SS0C2437E0D	CXCL13_CXCR5	simple:O43927	simple:P32302	ENSG00000156234	ENSG00000160683	TRUE	FALSE	TRUE	curated	FALSE	NA	NA	0	0	NA	NA
CPI-SS07835EECF	VIP_AVPR1A	simple:P01282	simple:P37288	ENSG00000146469	ENSG00000166148	TRUE	FALSE	TRUE	IMEx,IntAct	FALSE	NA	NA	0	0.068	NA	NA
CPI-SS00399ED03	AVP_AVPR1A	simple:P01185	simple:P37288	ENSG00000101200	ENSG00000166148	TRUE	FALSE	TRUE	I2D,IMEx,IntAct	FALSE	NA	NA	0.079	0.155	3423	0.669
CPI-SS0C8A09915	VIP_VIPR1	simple:P01282	simple:P32241	ENSG00000146469	ENSG00000114812	TRUE	FALSE	TRUE	guidetopharmacology.org	FALSE	NA	NA	0.397	1514	NA	NA
CPI-SS062DED513	ADCYAP1_VIPR1	simple:P18509	simple:P32241	ENSG00000141433	ENSG00000114812	TRUE	FALSE	TRUE	I2D	FALSE	NA	NA	0.131	0	NA	NA
CPI-SS003AFD9BA	GHRH_VIPR1	simple:P01286	simple:P32241	ENSG00000118702	ENSG00000114812	TRUE	FALSE	TRUE	guidetopharmacology.org	FALSE	NA	NA	3153	0.895	3.43	0.438
CPI-SS05B60E59C	VIP_VIPR2	simple:P01282	simple:P41587	ENSG00000146469	ENSG00000106018	TRUE	FALSE	TRUE	I2D	FALSE	NA	NA	0	0.945	NA	NA
CPI-SS0A82945AA	PYY_NPY4R	simple:P10082	simple:P50391	ENSG00000131096	ENSG00000204174	TRUE	FALSE	TRUE	guidetopharmacology.org	FALSE	NA	NA	0	1115	NA	NA
CPI-SS0A06F86B9	PPY_NPY4R	simple:P01298	simple:P50391	ENSG00000108849	ENSG00000204174	TRUE	FALSE	TRUE	guidetopharmacology.org	FALSE	NA	NA	1.48	1664	2233	0
CPI-SS0445D021B	PYY_NPY5R	simple:P10082	simple:Q15761	ENSG00000131096	ENSG00000164129	TRUE	FALSE	TRUE	I2D	FALSE	NA	NA	2008	1515	NA	NA
CPI-SS0C2000B56	PPY_NPY5R	simple:P01298	simple:Q15761	ENSG00000108849	ENSG00000164129	TRUE	FALSE	TRUE	guidetopharmacology.org	FALSE	NA	NA	0	1827	NA	NA
CPI-SS0A9F17199	PYY_NPY1R	simple:P10082	simple:P25929	ENSG00000131096	ENSG00000164128	TRUE	FALSE	TRUE	guidetopharmacology.org	FALSE	NA	NA	0	0.686	NA	NA
CPI-SS0FEF2FF5D	PYY_NPY2R	simple:P10082	simple:P49146	ENSG00000131096	ENSG00000185149	TRUE	FALSE	TRUE	guidetopharmacology.org	FALSE	NA	NA	0	0.186	NA	NA
CPI-SS04A7BCE8D	NPPA_NPR3	simple:P01160	simple:P17342	ENSG00000175206	ENSG00000113389	TRUE	FALSE	TRUE	I2D,InnateDB-All	FALSE	NA	NA	0.309	0.077	NA	NA
CPI-SS0230EE330	NPPA_NPR2	simple:P01160	simple:P20594	ENSG00000175206	ENSG00000159899	TRUE	FALSE	TRUE	I2D,InnateDB-All	FALSE	NA	NA	0	0	NA	NA
CPI-SS0D3C90DDA	WISP3_SORL1	simple:O95389	simple:Q92673	ENSG00000112761	ENSG00000137642	TRUE	FALSE	TRUE	InnateDB-All	FALSE	NA	NA	0.128	0	NA	NA
CPI-SS023ABAE18	XCL1_ADGRV1	simple:P47992	simple:Q8WXG9	ENSG00000143184	ENSG00000164199	TRUE	FALSE	TRUE	InnateDB-All	FALSE	NA	NA	0.138	0	NA	NA
CPI-SS048604E28	WNT3A_FZD8	simple:P56704	simple:Q9H461	ENSG00000154342	ENSG00000177283	TRUE	FALSE	TRUE	IMEx,IntAct	FALSE	NA	NA	0	0	NA	NA
CPI-SS0193C3064	WNT1_FZD8	simple:P04628	simple:Q9H461	ENSG00000125084	ENSG00000177283	TRUE	FALSE	TRUE	I2D,InnateDB-All	FALSE	NA	NA	0	0.217	NA	NA
CPI-SS0D782F60B	WNT4_FZD8	simple:P56705	simple:Q9H461	ENSG00000162552	ENSG00000177283	TRUE	FALSE	TRUE	I2D	FALSE	NA	NA	0	0	NA	NA
CPI-SS0DC5ADBF1	WNT1_FZD1	simple:P04628	simple:Q9UP38	ENSG00000125084	ENSG00000157240	TRUE	FALSE	TRUE	curated	FALSE	NA	NA	0	0	0	0.119
CPI-SS0CA020C34	WNT4_FZD1	simple:P56705	simple:Q9UP38	ENSG00000162552	ENSG00000157240	TRUE	FALSE	TRUE	I2D	FALSE	NA	NA	0	0	1316	0
CPI-SS0E4DE8215	WNT2_FZD1	simple:P09544	simple:Q9UP38	ENSG00000105989	ENSG00000157240	TRUE	FALSE	TRUE	I2D	FALSE	NA	NA	0.06	0	0	0.386
CPI-SS0097929A7	BMP7_SLAMF1	simple:P18075	simple:Q13291	ENSG00000101144	ENSG00000117090	TRUE	FALSE	TRUE	InnateDB-All	FALSE	NA	NA	0	0	0	0
CPI-SS01DCC7684	EFNA2_EPHA7	simple:O43921	simple:Q15375	ENSG00000099617	ENSG00000135333	FALSE	FALSE	TRUE	curated	FALSE	NA	NA	0.096	0	NA	NA
CPI-SS00A6240B6	WNT1_ROR2	simple:P04628	simple:Q01974	ENSG00000125084	ENSG00000169071	TRUE	FALSE	TRUE	InnateDB-All	FALSE	NA	NA	0	0	NA	NA
CPI-SS014B0FCD2	WNT1_FZD3	simple:P04628	simple:Q9NPG1	ENSG00000125084	ENSG00000104290	TRUE	FALSE	TRUE	I2D	FALSE	NA	NA	1897	0	0	0
CPI-SS0F26BB901	WNT2_FZD3	simple:P09544	simple:Q9NPG1	ENSG00000105989	ENSG00000104290	TRUE	FALSE	TRUE	curated	FALSE	NA	NA	0	0	0.141	0.702
CPI-SS01ECFDA18	TNFRSF10C_TNFSF10	simple:O14798	simple:P50591	ENSG00000173535	ENSG00000121858	TRUE	TRUE	FALSE	curated	FALSE	NA	NA	0	0.185	NA	NA
CPI-SS01F908B16	TFF1_FCRL4	simple:P04155	simple:Q96PJ5	ENSG00000160182	ENSG00000163518	TRUE	FALSE	TRUE	IMEx,InnateDB-All,IntAct	FALSE	NA	NA	0	0.216	NA	NA
CPI-SS023738D54	FGFR1_FGF3	simple:P11362	simple:P11487	ENSG00000077782	ENSG00000186895	TRUE	TRUE	FALSE	I2D,InnateDB-All	FALSE	NA	NA	0	0.278	0	0.808
CPI-SS0E0BCE16F	FGFR1_FGF5	simple:P11362	simple:P12034	ENSG00000077782	ENSG00000138675	TRUE	TRUE	FALSE	I2D,InnateDB-All	FALSE	NA	NA	0	0	0.311	0.132
CPI-SS07833475A	FGFR1_FGF7	simple:P11362	simple:P21781	ENSG00000077782	ENSG00000140285	TRUE	TRUE	FALSE	I2D	FALSE	NA	NA	0	0.075	0.253	2512
CPI-SS0769B1FF3	FGFR1_FGF8	simple:P11362	simple:P55075	ENSG00000077782	ENSG00000107831	TRUE	TRUE	FALSE	I2D,IMEx,InnateDB-All,IntAct	FALSE	NA	NA	0	0	0.405	0
CPI-SS07BA4A3B7	FGFR2_FGF8	simple:P21802	simple:P55075	ENSG00000066468	ENSG00000107831	TRUE	TRUE	FALSE	I2D,IMEx,InnateDB-All,IntAct	FALSE	NA	NA	0	0	0.256	0
CPI-SS05C077A1E	FGFR4_FGF8	simple:P22455	simple:P55075	ENSG00000160867	ENSG00000107831	TRUE	TRUE	FALSE	I2D	FALSE	NA	NA	0.422	0.899	0	0
CPI-SS0D99CC068	FGFR3_FGF8	simple:P22607	simple:P55075	ENSG00000068078	ENSG00000107831	TRUE	TRUE	FALSE	I2D,IMEx,InnateDB-All	FALSE	NA	NA	0.625	0.83	NA	NA
CPI-SS0BF490275	FGFR1_KL	simple:P11362	simple:Q9UEF7	ENSG00000077782	ENSG00000133116	TRUE	TRUE	FALSE	I2D	FALSE	NA	NA	0.701	2477	0	0
CPI-SS0E63AB61E	EFNA2_EPHA4	simple:O43921	simple:P54764	ENSG00000099617	ENSG00000116106	FALSE	FALSE	TRUE	curated	FALSE	NA	NA	1815	1969	NA	NA
CPI-SS0EB136379	WNT1_CD36	simple:P04628	simple:P16671	ENSG00000125084	ENSG00000135218	TRUE	FALSE	TRUE	InnateDB	FALSE	NA	NA	4646	1627	0.755	0
CPI-SS0D8972B21	WNT1_RYK	simple:P04628	simple:P34925	ENSG00000125084	ENSG00000163785	TRUE	FALSE	TRUE	I2D	FALSE	NA	NA	0.213	0.388	1242	0
CPI-SS0A69F13A3	WNT4_SMO	simple:P56705	simple:Q99835	ENSG00000162552	ENSG00000128602	TRUE	FALSE	TRUE	I2D	FALSE	NA	NA	0	1465	0.119	0
CPI-SS016B7C7D6	BMP2_SMO	simple:P12643	simple:Q99835	ENSG00000125845	ENSG00000128602	TRUE	FALSE	TRUE	I2D	FALSE	NA	NA	0.508	0	0	0
CPI-SS0C2561156	WNT2_FZD4	simple:P09544	simple:Q9ULV1	ENSG00000105989	ENSG00000174804	TRUE	FALSE	TRUE	curated	FALSE	NA	NA	0	0	0	0
CPI-SS0A683CBC1	WNT7B_FZD10	simple:P56706	simple:Q9ULW2	ENSG00000188064	ENSG00000111432	TRUE	FALSE	TRUE	curated	FALSE	NA	NA	0	0	0	0.325
CPI-SS03156A825	LTA_LTBR	simple:P01374	simple:P36941	ENSG00000230279	ENSG00000111321	TRUE	FALSE	TRUE	I2D	FALSE	NA	NA	0	3141	NA	NA
CPI-SS0859C173B	TNFSF14_LTBR	simple:O43557	simple:P36941	ENSG00000125735	ENSG00000111321	TRUE	FALSE	TRUE	curated	FALSE	NA	NA	0	0	0.24	0
CPI-SS0110361CB	LTA_TNFRSF14	simple:P01374	simple:Q92956	ENSG00000230279	ENSG00000273936	TRUE	FALSE	TRUE	curated	FALSE	NA	NA	1059	0	NA	NA
CPI-SS0C28FEC7D	TNFSF13_TNFRSF14	simple:O75888	simple:Q92956	ENSG00000161955	ENSG00000273936	TRUE	FALSE	TRUE	I2D,InnateDB-All	FALSE	NA	NA	2203	0	NA	NA
CPI-SS019C98396	TNFSF14_TNFRSF14	simple:O43557	simple:Q92956	ENSG00000125735	ENSG00000273936	TRUE	FALSE	TRUE	curated	FALSE	NA	NA	0.513	2213	0.102	0
CPI-SS0879B8E95	CD160_TNFRSF14	simple:O95971	simple:Q92956	ENSG00000117281	ENSG00000273936	FALSE	TRUE	TRUE	curated	FALSE	NA	NA	1273	0.342	NA	NA
CPI-SS02ACCF1F7	MIF_TNFRSF14	simple:P14174	simple:Q92956	ENSG00000276701	ENSG00000273936	TRUE	FALSE	TRUE	I2D,IntAct	FALSE	NA	NA	0.154	0.06	NA	NA
CPI-SS08330207B	BTLA_TNFRSF14	simple:Q7Z6A9	simple:Q92956	ENSG00000186265	ENSG00000273936	FALSE	TRUE	TRUE	guidetopharmacology.org	FALSE	NA	NA	1047	0	0.512	0
CPI-SS0B89DD8C1	TNFSF13_TNFRSF17	simple:O75888	simple:Q02223	ENSG00000161955	ENSG00000048462	TRUE	FALSE	TRUE	curated	FALSE	NA	NA	1995	0	NA	NA
CPI-SS059EEFDC6	MIF_TNFRSF10D	simple:P14174	simple:Q9UBN6	ENSG00000276701	ENSG00000173530	TRUE	FALSE	TRUE	I2D,IntAct	FALSE	NA	NA	0	0.09	NA	NA
CPI-SS0B34CBA4B	EFNA2_EPHA1	simple:O43921	simple:P21709	ENSG00000099617	ENSG00000284816	FALSE	FALSE	TRUE	curated	FALSE	NA	NA	0.593	0	NA	NA
CPI-SS08A54963F	EFNA2_EPHA2	simple:O43921	simple:P29317	ENSG00000099617	ENSG00000142627	FALSE	FALSE	TRUE	curated	FALSE	NA	NA	0	0	NA	NA
CPI-SS046F6F0C1	EFNA1_EPHA2	simple:P20827	simple:P29317	ENSG00000169242	ENSG00000142627	TRUE	FALSE	TRUE	curated	FALSE	NA	NA	1145	0	NA	NA
CPI-SS0C875BA24	EFNA2_EPHA3	simple:O43921	simple:P29320	ENSG00000099617	ENSG00000044524	TRUE	FALSE	TRUE	curated	FALSE	NA	NA	0	0	NA	NA
CPI-SS0830C7910	EFNA2_EPHA8	simple:O43921	simple:P29322	ENSG00000099617	ENSG00000070886	FALSE	FALSE	TRUE	curated	FALSE	NA	NA	0.076	0	NA	NA
CPI-SS0D81D9F5E	EFNA2_EPHA5	simple:O43921	simple:P54756	ENSG00000099617	ENSG00000145242	FALSE	FALSE	TRUE	curated	FALSE	NA	NA	0	0.327	NA	NA
CPI-SC023986FB9	MSTN_TGFR_AVR2A	simple:O14793	complex:TGFR_AVR2A	ENSG00000138379		TRUE	FALSE	TRUE	curated	FALSE	NA	NA	0.569	0.362	2303	0
CPI-SC08968AFE6	MSTN_TGFR_AVR2B	simple:O14793	complex:TGFR_AVR2B	ENSG00000138379		TRUE	FALSE	TRUE	curated	FALSE	NA	NA	0	0.266	2371	0.763
CPI-SS073811AB3	TNFRSF11B_TNFSF11	simple:O00300	simple:O14788	ENSG00000164761	ENSG00000120659	TRUE	FALSE	TRUE	curated	FALSE	NA	NA	0.583	0.343	0.593	0
CPI-SC0D5CFA431	TGFB3_TGFbeta receptor1	simple:P10600	complex:TGFbeta receptor1	ENSG00000119699		TRUE	FALSE	TRUE	curated	FALSE	NA	NA	0.088	0	NA	NA
CPI-SC0077CEB82	TGFB3_TGFbeta receptor2	simple:P10600	complex:TGFbeta receptor2	ENSG00000119699		TRUE	FALSE	TRUE	curated	FALSE	NA	NA	0.062	0.266	NA	NA
CPI-SS0522A6CFA	ADM_MRGPRX2	simple:P35318	simple:Q96LB1	ENSG00000148926	ENSG00000183695	TRUE	FALSE	TRUE	guidetopharmacology.org	FALSE	NA	NA	2347	0.814	NA	NA
CPI-SS098F8DB82	POMC_MC4R	simple:P01189	simple:P32245	ENSG00000115138	ENSG00000166603	TRUE	FALSE	TRUE	guidetopharmacology.org	FALSE	NA	NA	2429	0.958	NA	NA
CPI-SS0BE6DBE1A	POMC_MC5R	simple:P01189	simple:P33032	ENSG00000115138	ENSG00000176136	TRUE	FALSE	TRUE	guidetopharmacology.org	FALSE	NA	NA	0	0	NA	NA
CPI-SS0B1F94CD2	POMC_MC3R	simple:P01189	simple:P41968	ENSG00000115138	ENSG00000124089	TRUE	FALSE	TRUE	guidetopharmacology.org	FALSE	NA	NA	0	0	NA	NA
CPI-SS0C0E2C69C	POMC_MC2R	simple:P01189	simple:Q01718	ENSG00000115138	ENSG00000185231	TRUE	FALSE	TRUE	I2D	FALSE	NA	NA	0	0	0.571	0
CPI-SS00BD8FF72	POMC_MC1R	simple:P01189	simple:Q01726	ENSG00000115138	ENSG00000258839	TRUE	FALSE	TRUE	guidetopharmacology.org	FALSE	NA	NA	0	0	0	0.054
CPI-SS00F282936	CXCR6_CXCL16	simple:O00574	simple:Q9H2A7	ENSG00000172215	ENSG00000161921	TRUE	TRUE	TRUE	guidetopharmacology.org	FALSE	NA	NA	0	0	0	0
CPI-SS04318D03E	ACKR2_CCL3	simple:O00590	simple:P10147	ENSG00000144648	ENSG00000278567	TRUE	TRUE	FALSE	curated	FALSE	NA	NA	0	0	NA	NA
CPI-SS0AFE077D8	ACKR2_CCL4	simple:O00590	simple:P13236	ENSG00000144648	ENSG00000277943	TRUE	TRUE	FALSE	curated	FALSE	NA	NA	0.653	0.672	NA	NA
CPI-SS0DA291AD9	GPR75_CCL5	simple:O95800	simple:P13501	ENSG00000119737	ENSG00000274233	TRUE	TRUE	FALSE	guidetopharmacology.org	FALSE	NA	NA	0.616	0.649	NA	NA
CPI-SS0638E0E29	CCR10_CCL7	simple:P46092	simple:P80098	ENSG00000184451	ENSG00000108688	TRUE	TRUE	FALSE	I2D	FALSE	NA	NA	0.323	0.061	NA	NA
CPI-SS045A5FC60	ACKR2_CCL14	simple:O00590	simple:Q16627	ENSG00000144648	ENSG00000277236	TRUE	TRUE	FALSE	curated	FALSE	NA	NA	0	0.056	NA	NA
CPI-SS059CC19A3	CCR1_CCL14	simple:P32246	simple:Q16627	ENSG00000163823	ENSG00000277236	TRUE	TRUE	FALSE	curated	FALSE	NA	NA	0.08	0.557	NA	NA
CPI-SS0FA7A69D9	CCR3_CCL14	simple:P51677	simple:Q16627	ENSG00000183625	ENSG00000277236	TRUE	TRUE	FALSE	curated	FALSE	NA	NA	0	1097	NA	NA
CPI-SS06B0861F1	ACKR2_CCL13	simple:O00590	simple:Q99616	ENSG00000144648	ENSG00000181374	TRUE	TRUE	FALSE	curated	FALSE	NA	NA	0.465	1263	NA	NA
CPI-SS0C98C08DA	CCR2_CCL13	simple:P41597	simple:Q99616	ENSG00000121807	ENSG00000181374	TRUE	TRUE	FALSE	curated	FALSE	NA	NA	0	0.348	NA	NA
CPI-SS0B887F7AC	CCR1_CCL13	simple:P32246	simple:Q99616	ENSG00000163823	ENSG00000181374	TRUE	TRUE	FALSE	guidetopharmacology.org	FALSE	NA	NA	0.34	0.515	NA	NA
CPI-SS0EDD062F7	CCR3_CCL13	simple:P51677	simple:Q99616	ENSG00000183625	ENSG00000181374	TRUE	TRUE	FALSE	curated	FALSE	NA	NA	0.391	2069	NA	NA
CPI-SS091B461CB	ACKR2_CCL28	simple:O00590	simple:Q9NRJ3	ENSG00000144648	ENSG00000151882	TRUE	TRUE	FALSE	I2D	FALSE	NA	NA	0	0	NA	NA
CPI-SS05B92CCC4	CCR3_CCL28	simple:P51677	simple:Q9NRJ3	ENSG00000183625	ENSG00000151882	TRUE	TRUE	FALSE	guidetopharmacology.org	FALSE	NA	NA	0	0.16	NA	NA
CPI-SS064C772FE	CCR10_CCL28	simple:P46092	simple:Q9NRJ3	ENSG00000184451	ENSG00000151882	TRUE	TRUE	FALSE	guidetopharmacology.org	FALSE	NA	NA	0	0	NA	NA
CPI-SS0B2979A10	CCR10_CCL27	simple:P46092	simple:Q9Y4X3	ENSG00000184451	ENSG00000213927	TRUE	TRUE	FALSE	curated	FALSE	NA	NA	0	0	NA	NA
CPI-SS092C1B321	CCR2_CCL26	simple:P41597	simple:Q9Y258	ENSG00000121807	ENSG00000006606	TRUE	TRUE	FALSE	curated	FALSE	NA	NA	0	0	0	0
CPI-SS04EE957D8	CCR1_CCL26	simple:P32246	simple:Q9Y258	ENSG00000163823	ENSG00000006606	TRUE	TRUE	FALSE	curated	FALSE	NA	NA	0.516	0	NA	NA
CPI-SS0815A0EE0	CCR3_CCL26	simple:P51677	simple:Q9Y258	ENSG00000183625	ENSG00000006606	TRUE	TRUE	FALSE	curated	FALSE	NA	NA	0.96	0	0	2531
CPI-SS0C84DF380	CCR1_CCL15	simple:P32246	simple:Q16663	ENSG00000163823	ENSG00000275528	TRUE	TRUE	FALSE	curated	FALSE	NA	NA	0.93	0	NA	NA
CPI-SS006C89002	CCR3_CCL15	simple:P51677	simple:Q16663	ENSG00000183625	ENSG00000275528	TRUE	TRUE	FALSE	curated	FALSE	NA	NA	0	0	NA	NA
CPI-SS0C916344D	AVP_OXTR	simple:P01185	simple:P30559	ENSG00000101200	ENSG00000180914	TRUE	FALSE	TRUE	I2D	FALSE	NA	NA	1.08	0.105	0	0.337
CPI-SS0FCF733EA	AVP_AVPR2	simple:P01185	simple:P30518	ENSG00000101200	ENSG00000126895	TRUE	FALSE	TRUE	I2D,InnateDB-All	FALSE	NA	NA	1.05	0.063	1874	0
CPI-SS02D4E44C7	AVP_AVPR1B	simple:P01185	simple:P47901	ENSG00000101200	ENSG00000198049	TRUE	FALSE	TRUE	I2D	FALSE	NA	NA	0	0.31	0	1285
CPI-SS074050495	GHRH_GHRHR	simple:P01286	simple:Q02643	ENSG00000118702	ENSG00000106128	TRUE	FALSE	TRUE	guidetopharmacology.org	FALSE	NA	NA	0.791	0	2413	0
CPI-SS032AD1183	NPPA_NPR1	simple:P01160	simple:P16066	ENSG00000175206	ENSG00000169418	TRUE	FALSE	TRUE	guidetopharmacology.org	FALSE	NA	NA	0	1865	NA	NA
CPI-SS0FC42EC80	EREG_ERBB4	simple:O14944	simple:Q15303	ENSG00000124882	ENSG00000178568	TRUE	FALSE	TRUE	curated	FALSE	NA	NA	0.321	0.056	0	0
CPI-SS004C23DCE	EREG_EGFR	simple:O14944	simple:P00533	ENSG00000124882	ENSG00000146648	TRUE	FALSE	TRUE	curated	FALSE	NA	NA	0.205	0.231	0	2.05
CPI-SS0978D28AB	NRG1_MS4A4A	simple:Q02297	simple:Q96JQ5	ENSG00000157168	ENSG00000110079	TRUE	TRUE	TRUE	IMEx,IntAct	FALSE	NA	NA	0.183	0.039	0.15	0
CPI-SS034D3988F	RSPO4_LGR4	simple:Q2I0M5	simple:Q9BXB1	ENSG00000101282	ENSG00000205213	TRUE	FALSE	TRUE	guidetopharmacology.org	FALSE	NA	NA	1958	0.454	NA	NA
CPI-SS0057AB387	RSPO1_LGR4	simple:Q2MKA7	simple:Q9BXB1	ENSG00000169218	ENSG00000205213	TRUE	FALSE	TRUE	guidetopharmacology.org	FALSE	NA	NA	0.355	1584	0	0.212
CPI-SS0609FCF76	RSPO4_LGR6	simple:Q2I0M5	simple:Q9HBX8	ENSG00000101282	ENSG00000133067	TRUE	FALSE	TRUE	guidetopharmacology.org	FALSE	NA	NA	0.251	0.509	NA	NA
CPI-SS0E5397537	RSPO1_LGR6	simple:Q2MKA7	simple:Q9HBX8	ENSG00000169218	ENSG00000133067	TRUE	FALSE	TRUE	guidetopharmacology.org	FALSE	NA	NA	0.15	0	0	0.212
CPI-SS0ED2573CA	TNFSF11_TNFRSF11A	simple:O14788	simple:Q9Y6Q6	ENSG00000120659	ENSG00000141655	TRUE	TRUE	TRUE	curated	FALSE	NA	NA	0	0.314	0.383	0.537
CPI-SS0FF55B42C	EPHB3_EFNB1	simple:P54753	simple:P98172	ENSG00000182580	ENSG00000090776	FALSE	TRUE	FALSE	curated	FALSE	NA	NA	0	0.062	2259	0
CPI-SS0A5B945E3	EPHB3_EFNB3	simple:P54753	simple:Q15768	ENSG00000182580	ENSG00000108947	FALSE	TRUE	TRUE	curated	FALSE	NA	NA	0.206	0	0.221	0
CPI-SS02AFCED82	EPHA2_EFNA5	simple:P29317	simple:P52803	ENSG00000142627	ENSG00000184349	FALSE	TRUE	FALSE	curated	FALSE	NA	NA	0.129	0	0	0
CPI-SS082ABF1EA	EFNB2_EPHB3	simple:P52799	simple:P54753	ENSG00000125266	ENSG00000182580	FALSE	TRUE	TRUE	curated	FALSE	NA	NA	0	0	0.24	0
CPI-SS07BECB892	EPHA2_EFNA3	simple:P29317	simple:P52797	ENSG00000142627	ENSG00000143590	FALSE	TRUE	FALSE	curated	FALSE	NA	NA	0	0	0	0
CPI-SS09F973C1A	EPHA2_EFNA4	simple:P29317	simple:P52798	ENSG00000142627	ENSG00000243364	TRUE	TRUE	FALSE	curated	FALSE	NA	NA	0	0.56	0.227	0
CPI-SS04C396C5D	VGF_NTRK1	simple:O15240	simple:P04629	ENSG00000128564	ENSG00000198400	TRUE	FALSE	TRUE	InnateDB-All	FALSE	NA	NA	0	0.815	NA	NA
CPI-SS052127A00	NGF_NTRK1	simple:P01138	simple:P04629	ENSG00000134259	ENSG00000198400	TRUE	FALSE	TRUE	curated	FALSE	NA	NA	2124	0	NA	NA
CPI-SS0EDD4928A	NGF_NGFR	simple:P01138	simple:P08138	ENSG00000134259	ENSG00000064300	TRUE	FALSE	TRUE	curated	FALSE	NA	NA	1836	0	NA	NA
CPI-SS08B85996F	TTR_NGFR	simple:P02766	simple:P08138	ENSG00000118271	ENSG00000064300	TRUE	FALSE	TRUE	IMEx,InnateDB-All,MINT	FALSE	NA	NA	1942	0.486	NA	NA
CPI-SS00D3CD86E	TTR_DDR1	simple:P02766	simple:Q08345	ENSG00000118271	ENSG00000223680	TRUE	FALSE	TRUE	I2D,IMEx,InnateDB-All,IntAct	FALSE	NA	NA	0.056	0.079	NA	NA
CPI-SS06006F870	TTR_AGER	simple:P02766	simple:Q15109	ENSG00000118271	ENSG00000230514	TRUE	FALSE	TRUE	I2D,IMEx,InnateDB-All,MINT	FALSE	NA	NA	2674	1989	NA	NA
CPI-SS0A915097A	GRIN2D_IL16	simple:O15399	simple:Q14005	ENSG00000105464	ENSG00000172349	TRUE	TRUE	FALSE	I2D	FALSE	NA	NA	0.487	0.486	0	0.4
CPI-SS0A2949959	ICAM3_CD209	simple:P32942	simple:Q9NNX6	ENSG00000076662	ENSG00000090659	TRUE	FALSE	TRUE	curated	FALSE	NA	NA	0.221	2261	NA	NA
CPI-SS0322747C2	CEACAM5_CEACAM6	simple:P06731	simple:P40199	ENSG00000105388	ENSG00000086548	FALSE	FALSE	FALSE	curated	FALSE	NA	NA	0	0.321	NA	NA
CPI-SS014BDDB65	MLNR_MLN	simple:O43193	simple:P12872	ENSG00000102539	ENSG00000096395	TRUE	TRUE	FALSE	I2D	FALSE	NA	NA	0	0	NA	NA
CPI-SS0D449DE26	MLNR_GHRL	simple:O43193	simple:Q9UBU3	ENSG00000102539	ENSG00000157017	TRUE	TRUE	FALSE	I2D,InnateDB-All	FALSE	NA	NA	0.168	0	NA	NA
CPI-SS05D406038	PTGIR_GHRL	simple:P43119	simple:Q9UBU3	ENSG00000160013	ENSG00000157017	TRUE	TRUE	FALSE	InnateDB-All	FALSE	NA	NA	0	0	NA	NA
CPI-SS079DDF890	TNFSF12_TNFRSF25	simple:O43508	simple:Q93038	ENSG00000239697	ENSG00000215788	TRUE	FALSE	TRUE	I2D	FALSE	NA	NA	0	0	NA	NA
CPI-SS0B0CF0EDF	TNFSF15_TNFRSF25	simple:O95150	simple:Q93038	ENSG00000181634	ENSG00000215788	TRUE	FALSE	TRUE	guidetopharmacology.org	FALSE	NA	NA	0	0	NA	NA
CPI-SS02EF3E1BA	TNFSF12_TNFRSF12A	simple:O43508	simple:Q9NP84	ENSG00000239697	ENSG00000006327	TRUE	FALSE	TRUE	curated	FALSE	NA	NA	0.258	0	0	0.269
CPI-SS0D9EFC4F7	GNRH1_GNRHR	simple:P01148	simple:P30968	ENSG00000147437	ENSG00000109163	TRUE	FALSE	TRUE	I2D	FALSE	NA	NA	0.102	0	0	0.243
CPI-SS084816B12	HCRT_HCRTR1	simple:O43612	simple:O43613	ENSG00000161610	ENSG00000121764	TRUE	FALSE	TRUE	guidetopharmacology.org	FALSE	NA	NA	2.33	0.392	NA	NA
CPI-SS02461AE98	HCRT_HCRTR2	simple:O43612	simple:O43614	ENSG00000161610	ENSG00000137252	TRUE	FALSE	TRUE	guidetopharmacology.org	FALSE	NA	NA	0.307	0.101	NA	NA
CPI-SC0BD56F4CB	PSPN_RET receptor 4	simple:O60542	complex:RET receptor 4	ENSG00000125650		TRUE	FALSE	TRUE	curated	FALSE	NA	NA	0	0	0	0.113
CPI-SS05E001125	LGR5_RSPO4	simple:O75473	simple:Q2I0M5	ENSG00000139292	ENSG00000101282	TRUE	TRUE	FALSE	guidetopharmacology.org	FALSE	NA	NA	0.148	0	NA	NA
CPI-SS0F102AAC5	LGR5_RSPO1	simple:O75473	simple:Q2MKA7	ENSG00000139292	ENSG00000169218	TRUE	TRUE	FALSE	guidetopharmacology.org	FALSE	NA	NA	0	0	0	0.293
CPI-SS0FC0CA5ED	LGR5_RSPO2	simple:O75473	simple:Q6UXX9	ENSG00000139292	ENSG00000147655	TRUE	TRUE	FALSE	guidetopharmacology.org	FALSE	NA	NA	0.273	0	0	0
CPI-SS0DCA749B0	LGR5_RSPO3	simple:O75473	simple:Q9BXY4	ENSG00000139292	ENSG00000146374	TRUE	TRUE	FALSE	guidetopharmacology.org	FALSE	NA	NA	0	0.181	0	1109
CPI-SS05B1FA8A8	LRP6_CKLF	simple:O75581	simple:Q9UBR5	ENSG00000281324	ENSG00000217555	TRUE	TRUE	FALSE	IMEx,IntAct	FALSE	NA	NA	0.245	0.201	NA	NA
CPI-SS00F979E99	ICAM3_CLEC4M	simple:P32942	simple:Q9H2X3	ENSG00000076662	ENSG00000104938	TRUE	FALSE	TRUE	curated	FALSE	NA	NA	0	0.168	NA	NA
CPI-SS065F7DA2A	COPA_P2RY6	simple:P53621	simple:Q15077	ENSG00000122218	ENSG00000171631	TRUE	FALSE	TRUE	IMEx,IntAct	FALSE	NA	NA	0.051	0.189	0	0
CPI-SS09A3FA737	NAMPT_P2RY6	simple:P43490	simple:Q15077	ENSG00000105835	ENSG00000171631	TRUE	FALSE	TRUE	IMEx,IntAct	FALSE	NA	NA	0.07	0.287	0	0
CPI-SS04FB6F38D	PROK1_PROKR1	simple:P58294	simple:Q8TCW9	ENSG00000143125	ENSG00000169618	TRUE	FALSE	TRUE	guidetopharmacology.org	FALSE	NA	NA	0.078	0	NA	NA
CPI-SS033C67295	UTS2_UTS2R	simple:O95399	simple:Q9UKP6	ENSG00000049247	ENSG00000181408	TRUE	FALSE	TRUE	guidetopharmacology.org	FALSE	NA	NA	0.56	2.37	NA	NA
CPI-SS0706A559F	UTS2B_UTS2R	simple:Q765I0	simple:Q9UKP6	ENSG00000188958	ENSG00000181408	TRUE	FALSE	TRUE	I2D,InnateDB-All	FALSE	NA	NA	0	3681	NA	NA
CPI-SS00EC753E6	GLP2R_GCG	simple:O95838	simple:P01275	ENSG00000065325	ENSG00000115263	TRUE	TRUE	FALSE	guidetopharmacology.org	FALSE	NA	NA	0.108	0.251	0	0
CPI-SS079728E8B	ADORA2B_ENTPD1	simple:P29275	simple:P49961	ENSG00000170425	ENSG00000138185	FALSE	TRUE	FALSE	curated	FALSE	NA	NA	0.082	0	NA	NA
CPI-SS069924427	AGT_AGTR2	simple:P01019	simple:P50052	ENSG00000135744	ENSG00000180772	TRUE	FALSE	TRUE	guidetopharmacology.org	FALSE	NA	NA	0.146	0	2877	2733
CPI-SS075D9B9AD	KNG1_BDKRB1	simple:P01042	simple:P46663	ENSG00000113889	ENSG00000100739	TRUE	FALSE	TRUE	guidetopharmacology.org	FALSE	NA	NA	0	0	NA	NA
CPI-SS06AC5AF53	PENK_MRGPRX1	simple:P01210	simple:Q96LB2	ENSG00000181195	ENSG00000170255	TRUE	FALSE	TRUE	guidetopharmacology.org	FALSE	NA	NA	0.288	0	NA	NA
CPI-SS035A3ADDF	FSHB_FSHR	simple:P01225	simple:P23945	ENSG00000131808	ENSG00000170820	TRUE	FALSE	TRUE	I2D,IMEx,InnateDB-All,IntAct	FALSE	NA	NA	0	0.06	NA	NA
CPI-SS0C7833961	TSHB_TSHR	simple:P01222	simple:P16473	ENSG00000134200	ENSG00000165409	TRUE	FALSE	TRUE	I2D	FALSE	NA	NA	0	0.582	0	2644
CPI-SS0A606E2DA	GH1_PRLR	simple:P01241	simple:P16471	ENSG00000259384	ENSG00000113494	TRUE	FALSE	TRUE	I2D,InnateDB-All,IntAct	FALSE	NA	NA	3.16	1115	0	0.376
CPI-SS0ACD3CCEE	GH1_GHR	simple:P01241	simple:P10912	ENSG00000259384	ENSG00000112964	TRUE	FALSE	TRUE	guidetopharmacology.org	FALSE	NA	NA	0.296	1458	0	0.342
CPI-SS0DB45E7DF	GH2_GHR	simple:P01242	simple:P10912	ENSG00000136487	ENSG00000112964	TRUE	FALSE	TRUE	guidetopharmacology.org	FALSE	NA	NA	0	1077	0	2403
CPI-SS0D87F8BD7	PTH_PTH2R	simple:P01270	simple:P49190	ENSG00000152266	ENSG00000144407	TRUE	FALSE	TRUE	I2D,InnateDB-All	FALSE	NA	NA	2394	1933	NA	NA
CPI-SS012B216F6	PTHLH_PTH2R	simple:P12272	simple:P49190	ENSG00000087494	ENSG00000144407	TRUE	FALSE	TRUE	guidetopharmacology.org	FALSE	NA	NA	2271	0.352	0	0.303
CPI-SS0F32DB87D	PTH_PTH1R	simple:P01270	simple:Q03431	ENSG00000152266	ENSG00000160801	TRUE	FALSE	TRUE	I2D,IMEx,InnateDB-All,IntAct	FALSE	NA	NA	0.661	0	NA	NA
CPI-SS0483CE4ED	PTHLH_PTH1R	simple:P12272	simple:Q03431	ENSG00000087494	ENSG00000160801	TRUE	FALSE	TRUE	guidetopharmacology.org	FALSE	NA	NA	0	0.081	3572	1325
CPI-SS058E608D0	PTHLH_PRLHR	simple:P12272	simple:P49683	ENSG00000087494	ENSG00000119973	TRUE	FALSE	TRUE	guidetopharmacology.org	FALSE	NA	NA	0	0	1209	0.138
CPI-SS0C6448B94	IL1B_ADRB2	simple:P01584	simple:P07550	ENSG00000125538	ENSG00000169252	TRUE	FALSE	TRUE	I2D	FALSE	NA	NA	1643	1661	0.448	0
CPI-SS0C1F25516	CD8A_CEACAM5	simple:P01732	simple:P06731	ENSG00000153563	ENSG00000105388	TRUE	TRUE	FALSE	curated	FALSE	NA	NA	0.081	0	0	0
CPI-SS06CCF5A54	ANXA1_FPR3	simple:P04083	simple:P25089	ENSG00000135046	ENSG00000187474	TRUE	FALSE	TRUE	guidetopharmacology.org	FALSE	NA	NA	0.587	0	NA	NA
CPI-SS030BB46BB	ANXA1_FPR2	simple:P04083	simple:P25090	ENSG00000135046	ENSG00000171049	TRUE	FALSE	TRUE	curated	FALSE	NA	NA	0	0	NA	NA
CPI-SS0F66EA6BE	APP_FPR2	simple:P05067	simple:P25090	ENSG00000142192	ENSG00000171049	FALSE	FALSE	TRUE	guidetopharmacology.org	FALSE	NA	NA	1099	0	NA	NA
CPI-SS018FB4D9F	RLN2_RXFP2	simple:P04090	simple:Q8WXD0	ENSG00000107014	ENSG00000133105	TRUE	FALSE	TRUE	guidetopharmacology.org	FALSE	NA	NA	0.714	0	2826	0
CPI-SS0D3A5646A	RLN1_RXFP2	simple:P04808	simple:Q8WXD0	ENSG00000107018	ENSG00000133105	TRUE	FALSE	TRUE	guidetopharmacology.org	FALSE	NA	NA	0	0	2815	0
CPI-SS06CF55F94	INSL3_RXFP2	simple:P51460	simple:Q8WXD0	ENSG00000248099	ENSG00000133105	TRUE	FALSE	TRUE	guidetopharmacology.org	FALSE	NA	NA	0	0	0.316	0
CPI-SS0F8DE3306	RLN2_RXFP3	simple:P04090	simple:Q9NSD7	ENSG00000107014	ENSG00000277069	TRUE	FALSE	TRUE	guidetopharmacology.org	FALSE	NA	NA	0	0	NA	NA
CPI-SS092E57263	CSF2_CSF1R	simple:P04141	simple:P07333	ENSG00000164400	ENSG00000182578	TRUE	FALSE	TRUE	guidetopharmacology.org	FALSE	NA	NA	0.487	0.299	NA	NA
CPI-SS066FBE098	IL13_IL13RA2	simple:P35225	simple:Q14627	ENSG00000169194	ENSG00000123496	TRUE	FALSE	TRUE	curated	FALSE	NA	NA	0.188	0	0.567	0.206
CPI-SS0186F8AED	TNFSF9_IL13RA2	simple:P41273	simple:Q14627	ENSG00000125657	ENSG00000123496	TRUE	FALSE	TRUE	InnateDB-All	FALSE	NA	NA	3689	0	2491	0
CPI-SS0073098F3	IL13_TMEM219	simple:P35225	simple:Q86XT9	ENSG00000169194	ENSG00000149932	TRUE	FALSE	TRUE	IMEx,IntAct	FALSE	NA	NA	0.461	0.129	0	0
CPI-SS0431D2256	TNFSF9_TNFRSF9	simple:P41273	simple:Q07011	ENSG00000125657	ENSG00000049249	TRUE	FALSE	TRUE	curated	FALSE	NA	NA	0	0.193	2991	2149
CPI-SS047CD2E9F	TNFSF9_ADGRG5	simple:P41273	simple:Q8IZF4	ENSG00000125657	ENSG00000159618	TRUE	FALSE	TRUE	InnateDB-All	FALSE	NA	NA	0.394	3483	0.797	0.649
CPI-SS0DC2A6D35	IL6_HRH1	simple:P05231	simple:P35367	ENSG00000136244	ENSG00000196639	TRUE	FALSE	TRUE	IMEx,InnateDB-All,IntAct	FALSE	NA	NA	0	0.2	NA	NA
CPI-SS00B1BEE64	CD2_CD58	simple:P06729	simple:P19256	ENSG00000116824	ENSG00000116815	FALSE	TRUE	FALSE	curated	FALSE	NA	NA	0.869	3616	NA	NA
CPI-SS0B537DD3F	CEACAM5_CEACAM1	simple:P06731	simple:P13688	ENSG00000105388	ENSG00000079385	TRUE	FALSE	FALSE	curated	FALSE	NA	NA	1125	0.508	1679	0.171
CPI-SS0AC66088D	CEACAM5_CD1D	simple:P06731	simple:P15813	ENSG00000105388	ENSG00000158473	FALSE	FALSE	FALSE	curated	FALSE	NA	NA	2.52	0.645	0	0
CPI-SS0A05319F5	CRH_CRHR2	simple:P06850	simple:Q13324	ENSG00000147571	ENSG00000106113	TRUE	FALSE	TRUE	I2D,InnateDB-All	FALSE	NA	NA	0.059	0	0.309	0.227
CPI-SS0E654708F	UCN_CRHR2	simple:P55089	simple:Q13324	ENSG00000163794	ENSG00000106113	TRUE	FALSE	TRUE	guidetopharmacology.org	FALSE	NA	NA	0.146	0.271	NA	NA
CPI-SS05BE83BC6	CSF1R_CSF3	simple:P07333	simple:P09919	ENSG00000182578	ENSG00000108342	TRUE	TRUE	FALSE	guidetopharmacology.org	FALSE	NA	NA	0.177	0	NA	NA
CPI-SS0DFA98A14	CSF1R_IL34	simple:P07333	simple:Q6ZMJ4	ENSG00000182578	ENSG00000157368	TRUE	TRUE	FALSE	curated	FALSE	NA	NA	0	1632	0.299	0
CPI-SS07AF9303D	GRP_GRPR	simple:P07492	simple:P30550	ENSG00000134443	ENSG00000126010	TRUE	FALSE	TRUE	guidetopharmacology.org	FALSE	NA	NA	0.127	0.821	NA	NA
CPI-SS0D954EA1C	PDGFRB_PDGFD	simple:P09619	simple:Q9GZP0	ENSG00000113721	ENSG00000170962	TRUE	TRUE	FALSE	curated	FALSE	NA	NA	1433	0	0	0
CPI-CS0BAF97962	PDGFR complex_PDGFD	complex:PDGFR complex	simple:Q9GZP0		ENSG00000170962	TRUE	TRUE	FALSE	curated	FALSE	NA	NA	0	0	0	2.11
CPI-SS08376F0E6	CSF3_CSF3R	simple:P09919	simple:Q99062	ENSG00000108342	ENSG00000119535	TRUE	FALSE	TRUE	curated	FALSE	NA	NA	0.759	0	NA	NA
CPI-SS07327E587	CD28_CD80	simple:P10747	simple:P33681	ENSG00000178562	ENSG00000121594	FALSE	FALSE	TRUE	curated	FALSE	NA	NA	0.168	0.147	0.278	0
CPI-SS0320FFAFC	CTLA4_CD80	simple:P16410	simple:P33681	ENSG00000163599	ENSG00000121594	FALSE	FALSE	TRUE	curated	FALSE	NA	NA	0	0.63	0	0.106
CPI-SS077D7365D	CD28_CD86	simple:P10747	simple:P42081	ENSG00000178562	ENSG00000114013	FALSE	FALSE	TRUE	curated	FALSE	NA	NA	0	0.44	0	0.106
CPI-SS0B0E09B1C	CTLA4_CD86	simple:P16410	simple:P42081	ENSG00000163599	ENSG00000114013	FALSE	FALSE	TRUE	curated	FALSE	NA	NA	0	0.44	0	0.249
CPI-SS086A1C18B	SELE_SELPLG	simple:P16581	simple:Q14242	ENSG00000007908	ENSG00000110876	FALSE	FALSE	TRUE	curated	FALSE	NA	NA	0	0	2067	2.93
CPI-SS06ABF2F5A	SELP_CD24	simple:P16109	simple:P25063	ENSG00000174175	ENSG00000272398	FALSE	FALSE	FALSE	curated	FALSE	NA	NA	0	0.069	1547	0
CPI-SS04F90EE0D	SELE_GLG1	simple:P16581	simple:Q92896	ENSG00000007908	ENSG00000090863	FALSE	FALSE	FALSE	curated	FALSE	NA	NA	1106	2008	0	0
CPI-SS01560CA22	CD99_PILRA	simple:P14209	simple:Q9UKJ1	ENSG00000002586	ENSG00000085514	TRUE	FALSE	TRUE	curated	FALSE	NA	NA	1.45	1752	NA	NA
CPI-SS08E6EA18C	NPR1_NPPB	simple:P16066	simple:P16860	ENSG00000169418	ENSG00000120937	TRUE	TRUE	FALSE	guidetopharmacology.org	FALSE	NA	NA	0.681	0.051	0.156	0
CPI-SS0A1864A37	NPR1_NPPC	simple:P16066	simple:P23582	ENSG00000169418	ENSG00000163273	TRUE	TRUE	FALSE	InnateDB-All	FALSE	NA	NA	0.671	0	NA	NA
CPI-SS0EB4002A2	NPR3_NPPC	simple:P17342	simple:P23582	ENSG00000113389	ENSG00000163273	TRUE	TRUE	FALSE	I2D,InnateDB-All	FALSE	NA	NA	0	0	NA	NA
CPI-SS06B94F144	NPR2_NPPC	simple:P20594	simple:P23582	ENSG00000159899	ENSG00000163273	TRUE	TRUE	FALSE	guidetopharmacology.org	FALSE	NA	NA	0	0	NA	NA
CPI-SS05F0AFA81	NPR3_OSTN	simple:P17342	simple:P61366	ENSG00000113389	ENSG00000188729	TRUE	TRUE	FALSE	guidetopharmacology.org	FALSE	NA	NA	0	0	0	0
CPI-SS02C0BCFFE	PRLR_CSHL1	simple:P16471	simple:Q14406	ENSG00000113494	ENSG00000204414	TRUE	TRUE	FALSE	guidetopharmacology.org	FALSE	NA	NA	0	0	NA	NA
CPI-SS00F69C501	TRH_TRHR	simple:P20396	simple:P34981	ENSG00000170893	ENSG00000174417	TRUE	FALSE	TRUE	I2D	FALSE	NA	NA	0	0	NA	NA
CPI-SS056AA08CF	EDN2_EDNRA	simple:P20800	simple:P25101	ENSG00000127129	ENSG00000151617	TRUE	FALSE	TRUE	guidetopharmacology.org	FALSE	NA	NA	0	0	0	1911
CPI-SS04456F441	TNFSF4_TNFRSF4	simple:P23510	simple:P43489	ENSG00000117586	ENSG00000186827	FALSE	FALSE	TRUE	curated	FALSE	NA	NA	0.201	0	NA	NA
CPI-SS087BD262F	CXCR2_CXCL5	simple:P25025	simple:P42830	ENSG00000180871	ENSG00000163735	TRUE	TRUE	FALSE	curated	FALSE	NA	NA	0	0	NA	NA
CPI-SS0288E42FB	CXCR1_CXCL6	simple:P25024	simple:P80162	ENSG00000163464	ENSG00000124875	TRUE	TRUE	FALSE	curated	FALSE	NA	NA	0	1282	NA	NA
CPI-SS0C7915758	CXCR2_CXCL6	simple:P25025	simple:P80162	ENSG00000180871	ENSG00000124875	TRUE	TRUE	FALSE	curated	FALSE	NA	NA	0	0	NA	NA
CPI-SS0D2539AEB	FPR3_HEBP1	simple:P25089	simple:Q9NRV9	ENSG00000187474	ENSG00000013583	FALSE	TRUE	FALSE	guidetopharmacology.org	FALSE	NA	NA	0	0	NA	NA
CPI-SS0C321CE6D	FPR2_CAMP	simple:P25090	simple:P49913	ENSG00000171049	ENSG00000164047	TRUE	TRUE	FALSE	guidetopharmacology.org	FALSE	NA	NA	0	0.292	NA	NA
CPI-SS09A3A441F	GUCY2C_GUCA2A	simple:P25092	simple:Q02747	ENSG00000070019	ENSG00000197273	TRUE	TRUE	FALSE	guidetopharmacology.org	FALSE	NA	NA	0	0.065	NA	NA
CPI-SS099C401F7	ACVR2A_INHBE	simple:P27037	simple:P58166	ENSG00000121989	ENSG00000139269	TRUE	TRUE	FALSE	curated	FALSE	NA	NA	0.514	0.164	0	1.9
CPI-SS0412C803A	TNFRSF8_TNFSF8	simple:P28908	simple:P32971	ENSG00000120949	ENSG00000106952	FALSE	TRUE	FALSE	curated	FALSE	NA	NA	0.217	0	0	0.117
CPI-SS083319328	NTSR1_NTS	simple:P30989	simple:P30990	ENSG00000101188	ENSG00000133636	TRUE	TRUE	FALSE	guidetopharmacology.org	FALSE	NA	NA	0.374	0	NA	NA
CPI-SS073C1B796	CD52_SIGLEC10	simple:P31358	simple:Q96LC7	ENSG00000169442	ENSG00000142512	TRUE	FALSE	FALSE	curated	FALSE	NA	NA	1622	0	NA	NA
CPI-SS08833E2DA	CHRNA7_SLURP1	simple:P36544	simple:P55000	ENSG00000175344	ENSG00000126233	TRUE	TRUE	FALSE	IMEx,InnateDB-All,UniProt	FALSE	NA	NA	0.323	1762	NA	NA
CPI-SS076FEB261	FLT3_FLT3LG	simple:P36888	simple:P49771	ENSG00000122025	ENSG00000090554	TRUE	TRUE	FALSE	curated	FALSE	NA	NA	0	1465	NA	NA
CPI-SC00ACA947E	GDNF_RET receptor 1	simple:P39905	complex:RET receptor 1	ENSG00000168621		TRUE	FALSE	TRUE	curated	FALSE	NA	NA	1047	0.266	NA	NA
CPI-SC0EB9D030F	ARTN_RET receptor 1	simple:Q5T4W7	complex:RET receptor 1	ENSG00000117407		TRUE	FALSE	TRUE	curated	FALSE	NA	NA	0.83	0	1156	0.638
CPI-SC0273E24EB	ARTN_RET receptor 3	simple:Q5T4W7	complex:RET receptor 3	ENSG00000117407		TRUE	FALSE	TRUE	curated	FALSE	NA	NA	0.191	0.813	0	0
CPI-SS0DC2DD9D7	THPO_MPL	simple:P40225	simple:P40238	ENSG00000090534	ENSG00000117400	TRUE	FALSE	TRUE	curated	FALSE	NA	NA	1.67	0	NA	NA
CPI-SS0B6643F31	XCR1_XCL1	simple:P46094	simple:P47992	ENSG00000173578	ENSG00000143184	TRUE	TRUE	FALSE	curated	FALSE	NA	NA	1568	0	NA	NA
CPI-SS052D34F0B	XCR1_XCL2	simple:P46094	simple:Q9UBD3	ENSG00000173578	ENSG00000143185	TRUE	TRUE	FALSE	curated	FALSE	NA	NA	0	0.142	NA	NA
CPI-SS0B7A7E932	NPBWR2_NPW	simple:P48146	simple:Q8N729	ENSG00000277339	ENSG00000183971	TRUE	TRUE	FALSE	guidetopharmacology.org	FALSE	NA	NA	0	0	NA	NA
CPI-SS032E9A219	CX3CR1_CX3CL1	simple:P49238	simple:P78423	ENSG00000168329	ENSG00000006210	TRUE	TRUE	TRUE	curated	FALSE	NA	NA	1895	0	0	0
CPI-SS0EF1A7415	CCR4_CCL17	simple:P51679	simple:Q92583	ENSG00000183813	ENSG00000102970	TRUE	TRUE	FALSE	curated	FALSE	NA	NA	1345	0.27	0	1.52
CPI-SS0974EB232	ACKR1_CCL17	simple:Q16570	simple:Q92583	ENSG00000213088	ENSG00000102970	TRUE	TRUE	FALSE	I2D	FALSE	NA	NA	0.081	0	0	1421
CPI-SS09CCC0451	INHBE_ACVR2B	simple:P58166	simple:Q13705	ENSG00000139269	ENSG00000114739	TRUE	FALSE	TRUE	curated	FALSE	NA	NA	0	0.667	0	0.692
CPI-SS095DCA7F7	LILRA4_BST2	simple:P59901	simple:Q10589	ENSG00000276798	ENSG00000130303	FALSE	TRUE	FALSE	curated	FALSE	NA	NA	0	0	1286	0
CPI-SS0BC884A75	QRFP_QRFPR	simple:P83859	simple:Q96P65	ENSG00000188710	ENSG00000186867	TRUE	FALSE	TRUE	guidetopharmacology.org	FALSE	NA	NA	0	0.201	NA	NA
CPI-CS0123BC66C	PlexinA1_complex2_SEMA6D	complex:PlexinA1_complex2	simple:Q8NFY4		ENSG00000137872	FALSE	TRUE	FALSE	curated	FALSE	NA	NA	0.115	0.17	NA	NA
CPI-SS036437279	DSG1_DSC2	simple:Q02413	simple:Q02487	ENSG00000134760	ENSG00000134755	FALSE	FALSE	FALSE	curated	FALSE	NA	NA	0	0.167	0.212	0.736
CPI-SS062307CFE	DSG1_DSC1	simple:Q02413	simple:Q08554	ENSG00000134760	ENSG00000134765	FALSE	FALSE	FALSE	curated	FALSE	NA	NA	0	0.549	2806	0
CPI-SS09000F32A	DSG1_DSC3	simple:Q02413	simple:Q14574	ENSG00000134760	ENSG00000134762	FALSE	FALSE	FALSE	curated	FALSE	NA	NA	0	0	NA	NA
CPI-SS02EDE5894	CRHR2_UCN3	simple:Q13324	simple:Q969E3	ENSG00000106113	ENSG00000178473	TRUE	TRUE	FALSE	guidetopharmacology.org	FALSE	NA	NA	0	0	NA	NA
CPI-SS0F856A80F	KISS1_KISS1R	simple:Q15726	simple:Q969F8	ENSG00000170498	ENSG00000116014	TRUE	FALSE	TRUE	guidetopharmacology.org	FALSE	NA	NA	0	0	NA	NA
CPI-SS00ABEE10B	IGFL1_IGFLR1	simple:Q6UW32	simple:Q9H665	ENSG00000188293	ENSG00000126246	TRUE	FALSE	TRUE	IMEx,InnateDB-All,UniProt	FALSE	NA	NA	0	0	1414	0.238
CPI-SS08EDE5442	IGFL2_IGFLR1	simple:Q6UWQ7	simple:Q9H665	ENSG00000204866	ENSG00000126246	TRUE	FALSE	TRUE	IMEx,InnateDB-All,UniProt	FALSE	NA	NA	0	0	NA	NA
CPI-SS0327E1782	IGFL3_IGFLR1	simple:Q6UXB1	simple:Q9H665	ENSG00000188624	ENSG00000126246	TRUE	FALSE	TRUE	IMEx,InnateDB-All,UniProt	FALSE	NA	NA	0	0	NA	NA
CPI-SS08C995EB4	CXCL17_GPR35	simple:Q6UXB2	simple:Q9HC97	ENSG00000189377	ENSG00000178623	TRUE	FALSE	TRUE	guidetopharmacology.org	FALSE	NA	NA	0.057	0	NA	NA
CPI-SS0BA87E94E	GFRAL_GDF15	simple:Q6UXV0	simple:Q99988	ENSG00000187871	ENSG00000130513	TRUE	TRUE	FALSE	guidetopharmacology.org	FALSE	NA	NA	0	0	NA	NA
CPI-SC0F486460D	IFNL3_Type III IFNR	simple:Q8IZI9	complex:Type III IFNR	ENSG00000197110		TRUE	FALSE	TRUE	curated	FALSE	NA	NA	0	0	NA	NA
CPI-SC077B6280E	IFNL2_Type III IFNR	simple:Q8IZJ0	complex:Type III IFNR	ENSG00000183709		TRUE	FALSE	TRUE	curated	FALSE	NA	NA	1299	2124	NA	NA
CPI-SS027E57635	PROKR2_PROK2	simple:Q8NFJ6	simple:Q9HC23	ENSG00000101292	ENSG00000163421	TRUE	TRUE	FALSE	guidetopharmacology.org	FALSE	NA	NA	0	0	NA	NA
CPI-SS01CE67526	PROKR1_PROK2	simple:Q8TCW9	simple:Q9HC23	ENSG00000169618	ENSG00000163421	TRUE	TRUE	FALSE	guidetopharmacology.org	FALSE	NA	NA	0.904	0	NA	NA
CPI-SS0799949D7	RXFP4_INSL5	simple:Q8TDU9	simple:Q9Y5Q6	ENSG00000173080	ENSG00000172410	TRUE	TRUE	FALSE	guidetopharmacology.org	FALSE	NA	NA	1014	1242	NA	NA
CPI-SS0ACCAC836	RXFP3_INSL5	simple:Q9NSD7	simple:Q9Y5Q6	ENSG00000277069	ENSG00000172410	TRUE	TRUE	FALSE	guidetopharmacology.org	FALSE	NA	NA	0	0.239	NA	NA
CPI-SS025C8F785	CLEC2B_KLRF1	simple:Q92478	simple:Q9NZS2	ENSG00000110852	ENSG00000150045	FALSE	TRUE	TRUE	curated	FALSE	NA	NA	0.162	0.162	NA	NA
CPI-SC090068F7B	TSLP_TSLPR	simple:Q969D9	complex:TSLPR	ENSG00000145777		TRUE	FALSE	TRUE	curated	FALSE	NA	NA	0	0	0	0.442
CPI-SS050123B31	NPFFR1_NPVF	simple:Q9GZQ6	simple:Q9HCQ7	ENSG00000148734	ENSG00000105954	TRUE	TRUE	FALSE	guidetopharmacology.org	FALSE	NA	NA	1564	0	NA	NA
CPI-SS0FF51A757	TNFSF18_TNFRSF18	simple:Q9UNG2	simple:Q9Y5U5	ENSG00000120337	ENSG00000186891	TRUE	FALSE	TRUE	curated	FALSE	NA	NA	0	0.134	NA	NA
CPI-CC0D5F9D20F	a2Bb3 complex_fibrinogen	complex:a2Bb3 complex	complex:fibrinogen			FALSE	FALSE	FALSE	curated	TRUE	NA	NA	0	1096	NA	NA
CPI-CC08A4A83F1	aMb2 complex_fibrinogen	complex:aMb2 complex	complex:fibrinogen			FALSE	FALSE	FALSE	curated	TRUE	NA	NA	0	0	NA	NA
CPI-CC0F3691D07	aXb2 complex_fibrinogen	complex:aXb2 complex	complex:fibrinogen			FALSE	FALSE	FALSE	curated	TRUE	NA	NA	0	0	NA	NA
CPI-SS03821C2C6	PF4_ACKR1	simple:P02776	simple:Q16570	ENSG00000163737	ENSG00000213088	TRUE	FALSE	TRUE	I2D,InnateDB	FALSE	NA	NA	NA	NA	0	0
CPI-SS083B5EBAB	CXCL13_ACKR4	simple:O43927	simple:Q9NPB9	ENSG00000156234	ENSG00000129048	TRUE	FALSE	TRUE	curated	FALSE	NA	NA	NA	NA	0	0
CPI-SS02C418D99	WNT2_FZD2	simple:P09544	simple:Q14332	ENSG00000105989	ENSG00000180340	TRUE	FALSE	TRUE	curated	FALSE	NA	NA	NA	NA	0	0.829
CPI-SS008509DBD	CORT_SSTR4	simple:O00230	simple:P31391	ENSG00000241563	ENSG00000132671	TRUE	FALSE	TRUE	guidetopharmacology.org	FALSE	NA	NA	NA	NA	0.27	1085
CPI-SS0D53B88CC	ACVR2A_INHBC	simple:P27037	simple:P55103	ENSG00000121989	ENSG00000175189	TRUE	TRUE	FALSE	curated	FALSE	NA	NA	NA	NA	0.188	0
CPI-SS024E1CF41	SSTR4_SST	simple:P31391	simple:P61278	ENSG00000132671	ENSG00000157005	TRUE	TRUE	FALSE	I2D	FALSE	NA	NA	NA	NA	0	0
CPI-SS04BE14432	INHBC_ACVR2B	simple:P55103	simple:Q13705	ENSG00000175189	ENSG00000114739	TRUE	FALSE	TRUE	curated	FALSE	NA	NA	NA	NA	0	0.98
CPI-SS027556893	IFNA13_CR2	simple:P01562	simple:P20023	ENSG00000233816	ENSG00000117322	TRUE	FALSE	TRUE	I2D,InnateDB,InnateDB-All	FALSE	NA	NA	0.347	1997	NA	NA
CPI-SC064937925	IFNA13_Type I IFNR	simple:P01562	complex:Type I IFNR	ENSG00000233816		TRUE	FALSE	TRUE	curated	FALSE	NA	NA	0	0.298	NA	NA
